# Supplementary material for: Zvěstovite-(Fe), Ag6(Ag4Fe2)As4S13, a new member of the tetrahedrite group from the Ulatayskoe Ag–Cu–Co occurrence, eastern Siberia, Russia
Source: Copernicus journal article supplement (doi:10.5194/ejm-36-529-2024), 2024-06-26

## checkCIF/PLATON report

Structure factors have been supplied for datablock(s) shelx

THIS REPORT IS FOR GUIDANCE ONLY. IF USED AS PART OF A REVIEW PROCEDURE FOR PUBLICATION, IT SHOULD NOT REPLACE THE EXPERTISE OF AN EXPERIENCED CRYSTALLOGRAPHIC REFEREE.

No syntax errors found.      CIF dictionary      Interpreting this report

### Datablock: shelx

---

|                        |                                                                                                 |                                                                                                 |                          |
|------------------------|-------------------------------------------------------------------------------------------------|-------------------------------------------------------------------------------------------------|--------------------------|
| Bond precision:        | = 0.0000 A                                                                                      | Wavelength=0.71073                                                                              |                          |
| Cell:                  | a=10.8601(3)<br>alpha=90                                                                        | b=10.8601(3)<br>beta=90                                                                         | c=10.8601(3)<br>gamma=90 |
| Temperature:           | 293 K                                                                                           |                                                                                                 |                          |
|                        | Calculated                                                                                      | Reported                                                                                        |                          |
| Volume                 | 1280.86(11)                                                                                     | 1280.86(11)                                                                                     |                          |
| Space group            | I -4 3 m                                                                                        | I -4 3 m                                                                                        |                          |
| Hall group             | I -4 2 3                                                                                        | I -4 2 3                                                                                        |                          |
| Moiety formula         | Ag <sub>20.75</sub> As <sub>7.16</sub> Fe <sub>3.24</sub> S <sub>26</sub><br>Sb <sub>0.84</sub> | ?                                                                                               |                          |
| Sum formula            | Ag <sub>20.75</sub> As <sub>7.16</sub> Fe <sub>3.24</sub> S <sub>26</sub><br>Sb <sub>0.84</sub> | Ag <sub>10.37</sub> As <sub>3.58</sub> Fe <sub>1.62</sub> S <sub>13</sub><br>Sb <sub>0.42</sub> |                          |
| Mr                     | 3891.31                                                                                         | 1945.66                                                                                         |                          |
| Dx, g cm <sup>-3</sup> | 5.045                                                                                           | 5.045                                                                                           |                          |
| Z                      | 1                                                                                               | 2                                                                                               |                          |
| Mu (mm <sup>-1</sup> ) | 14.702                                                                                          | 14.702                                                                                          |                          |
| F000                   | 1754.5                                                                                          | 1754.5                                                                                          |                          |
| F000'                  | 1740.52                                                                                         |                                                                                                 |                          |
| h, k, lmax             | 16, 16, 16                                                                                      | 16, 16, 16                                                                                      |                          |
| Nref                   | 438[ 249]                                                                                       | 438                                                                                             |                          |
| Tmin, Tmax             | 0.499, 0.643                                                                                    | 0.915, 0.946                                                                                    |                          |
| Tmin'                  | 0.475                                                                                           |                                                                                                 |                          |

Correction method= # Reported T Limits: Tmin=0.915 Tmax=0.946  
AbsCorr = MULTI-SCAN

Data completeness= 1.76/1.00      Theta(max)= 31.708

R(reflections)= 0.0551( 400)

wR2(reflections)=  
0.1616( 438)

S = 1.160

Npar= 22

---

The following ALERTS were generated. Each ALERT has the format

**test-name\_ALERT\_alert-type\_alert-level.**

Click on the hyperlinks for more details of the test.

---

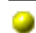

### Alert level C

|                   |                                                  |              |
|-------------------|--------------------------------------------------|--------------|
| PLAT077_ALERT_4_C | Unitcell Contains Non-integer Number of Atoms .. | Please Check |
| PLAT971_ALERT_2_C | Check Calcd Resid. Dens. 0.55Ang From M2B        | 1.97 eA-3    |
| PLAT971_ALERT_2_C | Check Calcd Resid. Dens. 0.58Ang From M2B        | 1.81 eA-3    |

---

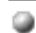

### Alert level G

|                   |                                                                                                          |              |
|-------------------|----------------------------------------------------------------------------------------------------------|--------------|
| PLAT004_ALERT_5_G | Polymeric Structure Found with Maximum Dimension                                                         | 2 Info       |
| PLAT017_ALERT_1_G | Check Scattering Type Consistency of M2A as                                                              | AG           |
| PLAT017_ALERT_1_G | Check Scattering Type Consistency of M2B as                                                              | AG           |
| PLAT045_ALERT_1_G | Calculated and Reported Z Differ by a Factor ...                                                         | 0.500 Check  |
| PLAT083_ALERT_2_G | SHELXL Second Parameter in WGHT Unusually Large                                                          | 18.28 Why ?  |
| PLAT168_ALERT_4_G | The CIF-Embedded .res File Contains EXYZ Records                                                         | 2 Report     |
| PLAT171_ALERT_4_G | The CIF-Embedded .res File Contains EADP Records                                                         | 3 Report     |
| PLAT199_ALERT_1_G | Reported _cell_measurement_temperature ..... (K)                                                         | 293 Check    |
| PLAT200_ALERT_1_G | Reported _diffrn_ambient_temperature ..... (K)                                                           | 293 Check    |
| PLAT300_ALERT_4_G | Atom Site Occupancy of X3SB Constrained at                                                               | 0.105 Check  |
| PLAT300_ALERT_4_G | Atom Site Occupancy of X3AS Constrained at                                                               | 0.895 Check  |
| PLAT301_ALERT_3_G | Main Residue Disorder .....(Resd 1)                                                                      | 78% Note     |
| PLAT720_ALERT_4_G | Number of Unusual/Non-Standard Labels .....<br>M2A M2B M1AG M1FE X3AS X3SB                               | 6 Note       |
| PLAT811_ALERT_5_G | No ADDSYM Analysis: Too Many Excluded Atoms ....                                                         | ! Info       |
| PLAT850_ALERT_4_G | Check Flack Parameter Exact Value 0.00 with s.u.                                                         | 0.11 Check   |
| PLAT883_ALERT_1_G | No Info/Value for _atom_sites_solution_primary .                                                         | Please Do !  |
| PLAT899_ALERT_4_G | SHELXL2018 is Deprecated and Succeeded by SHELXL                                                         | 2019/3 Note  |
| PLAT965_ALERT_2_G | The SHELXL WEIGHT Optimisation has not Converged                                                         | Please Check |
| PLAT969_ALERT_5_G | The 'Henn et al.' R-Factor-gap value .....<br>Predicted wR2: Based on SigI**2 2.61 or SHELX Weight 14.30 | 6.20 Note    |

---

- 0 **ALERT level A** = Most likely a serious problem - resolve or explain  
0 **ALERT level B** = A potentially serious problem, consider carefully  
3 **ALERT level C** = Check. Ensure it is not caused by an omission or oversight  
19 **ALERT level G** = General information/check it is not something unexpected
- 6 ALERT type 1 CIF construction/syntax error, inconsistent or missing data  
4 ALERT type 2 Indicator that the structure model may be wrong or deficient  
1 ALERT type 3 Indicator that the structure quality may be low  
8 ALERT type 4 Improvement, methodology, query or suggestion  
3 ALERT type 5 Informative message, check
- 
-

It is advisable to attempt to resolve as many as possible of the alerts in all categories. Often the minor alerts point to easily fixed oversights, errors and omissions in your CIF or refinement strategy, so attention to these fine details can be worthwhile. In order to resolve some of the more serious problems it may be necessary to carry out additional measurements or structure refinements. However, the purpose of your study may justify the reported deviations and the more serious of these should normally be commented upon in the discussion or experimental section of a paper or in the "special\_details" fields of the CIF. checkCIF was carefully designed to identify outliers and unusual parameters, but every test has its limitations and alerts that are not important in a particular case may appear. Conversely, the absence of alerts does not guarantee there are no aspects of the results needing attention. It is up to the individual to critically assess their own results and, if necessary, seek expert advice.

### **Publication of your CIF in IUCr journals**

A basic structural check has been run on your CIF. These basic checks will be run on all CIFs submitted for publication in IUCr journals (*Acta Crystallographica*, *Journal of Applied Crystallography*, *Journal of Synchrotron Radiation*); however, if you intend to submit to *Acta Crystallographica Section C* or *E* or *IUCrData*, you should make sure that full publication checks are run on the final version of your CIF prior to submission.

### **Publication of your CIF in other journals**

Please refer to the *Notes for Authors* of the relevant journal for any special instructions relating to CIF submission.

Datablock shelx - ellipsoid plot

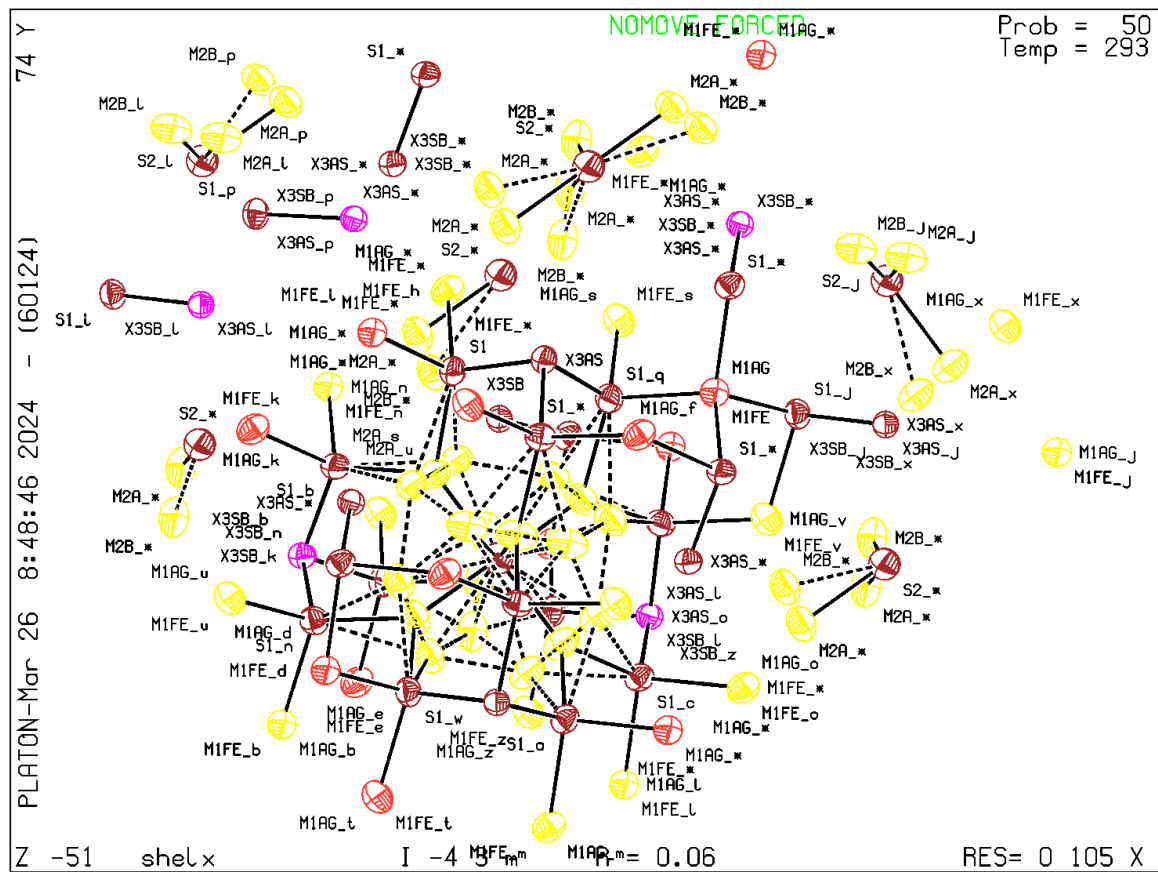

Supplement: Supplementary file 1 [file ejm-36-529-2024-supplement.zip › checkcif.pdf]
