# Supplementary material for: Zvěstovite-(Fe), Ag6(Ag4Fe2)As4S13, a new member of the tetrahedrite group from the Ulatayskoe Ag–Cu–Co occurrence, eastern Siberia, Russia
Source: Copernicus journal article supplement (doi:10.5194/ejm-36-529-2024), 2024-06-26
Supplement: Supplementary file 1 [file ejm-36-529-2024-supplement.zip]

Archive with 3 entries (3 files):
- checkcif.pdf
- ejm-36-529-2024-supplement-title-page.pdf
- zvestovite-(Fe).cif
