# Supplementary material for: Zvěstovite-(Fe), Ag6(Ag4Fe2)As4S13, a new member of the tetrahedrite group from the Ulatayskoe Ag–Cu–Co occurrence, eastern Siberia, Russia
Source: Copernicus journal article supplement (doi:10.5194/ejm-36-529-2024), 2024-06-26
Supplement: Supplementary file 1 [file ejm-36-529-2024-supplement.zip › ejm-36-529-2024-supplement-title-page.pdf]

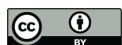

*Supplement of*

**Zvěstovite-(Fe),  $\text{Ag}_6(\text{Ag}_4\text{Fe}_2)\text{As}_4\text{S}_{13}$ , a new member of the tetrahedrite group from the Ulatayskoe Ag–Cu–Co occurrence, eastern Siberia, Russia**

**Cristian Biagioni et al.**

*Correspondence to:* Cristian Biagioni ([cristian.biagioni@unipi.it](mailto:cristian.biagioni@unipi.it))

- [ejm-36-529-2024-supplement-title-page.pdf](#)
- [checkcif.pdf](#)
- [zvestovite-\(Fe\).cif](#)

The copyright of individual parts of the supplement might differ from the article licence.
