# Supplementary material for: Zvěstovite-(Fe), Ag6(Ag4Fe2)As4S13, a new member of the tetrahedrite group from the Ulatayskoe Ag–Cu–Co occurrence, eastern Siberia, Russia
Source: Copernicus journal article supplement (doi:10.5194/ejm-36-529-2024), 2024-06-26
Supplement: Supplementary file 1 [file ejm-36-529-2024-supplement.zip › zvestovite-(Fe).cif]

 
data_shelx
 
_audit_creation_method            'SHELXL-2018/1'
_shelx_SHELXL_version_number      '2018/1'
_chemical_name_mineral            'zvestovite-(Fe)'
_chemical_compound_source         'Ulatayskoe, Russia'
_chemical_formula_analytical
;      
Ag9.93 As3.54 Cu0.54 Fe1.58 S12.83 Sb0.41
; 
_chemical_formula_sum
 'Ag10.37 As3.58 Fe1.62 S13 Sb0.42' 
_chemical_formula_weight         1945.66

loop_
 _atom_type_symbol
 _atom_type_description
 _atom_type_scat_dispersion_real
 _atom_type_scat_dispersion_imag
 _atom_type_scat_source
 'Ag'  'Ag'  -0.8971   1.1015
 'International Tables Vol C Tables 4.2.6.8 and 6.1.1.4'
 'As'  'As'   0.0499   2.0058
 'International Tables Vol C Tables 4.2.6.8 and 6.1.1.4'
 'Fe'  'Fe'   0.3463   0.8444
 'International Tables Vol C Tables 4.2.6.8 and 6.1.1.4'
 'S'  'S'   0.1246   0.1234
 'International Tables Vol C Tables 4.2.6.8 and 6.1.1.4'
 'Sb'  'Sb'  -0.5866   1.5461
 'International Tables Vol C Tables 4.2.6.8 and 6.1.1.4'
 'Cu'  'Cu'   0.3201   1.2651
 'International Tables Vol C Tables 4.2.6.8 and 6.1.1.4'
 
_space_group_crystal_system       cubic
_space_group_IT_number            217
_space_group_name_H-M_alt         'I -4 3 m'
_space_group_name_Hall            'I -4 2 3'
 
_shelx_space_group_comment
;
The symmetry employed for this shelxl refinement is uniquely defined
by the following loop, which should always be used as a source of
symmetry information in preference to the above space-group names.
They are only intended as comments.
;
 
loop_
 _space_group_symop_operation_xyz
 'x, y, z'
 'x, -y, -z'
 '-x, -y, z'
 '-x, y, -z'
 'y, -x, -z'
 '-y, -x, z'
 '-y, x, -z'
 'y, x, z'
 'y, z, x'
 '-y, -z, x'
 'y, -z, -x'
 '-y, z, -x'
 'z, -y, -x'
 'z, y, x'
 '-z, y, -x'
 '-z, -y, x'
 'z, x, y'
 '-z, x, -y'
 '-z, -x, y'
 'z, -x, -y'
 'x, z, y'
 'x, -z, -y'
 '-x, z, -y'
 '-x, -z, y'
 'x+1/2, y+1/2, z+1/2'
 'x+1/2, -y+1/2, -z+1/2'
 '-x+1/2, -y+1/2, z+1/2'
 '-x+1/2, y+1/2, -z+1/2'
 'y+1/2, -x+1/2, -z+1/2'
 '-y+1/2, -x+1/2, z+1/2'
 '-y+1/2, x+1/2, -z+1/2'
 'y+1/2, x+1/2, z+1/2'
 'y+1/2, z+1/2, x+1/2'
 '-y+1/2, -z+1/2, x+1/2'
 'y+1/2, -z+1/2, -x+1/2'
 '-y+1/2, z+1/2, -x+1/2'
 'z+1/2, -y+1/2, -x+1/2'
 'z+1/2, y+1/2, x+1/2'
 '-z+1/2, y+1/2, -x+1/2'
 '-z+1/2, -y+1/2, x+1/2'
 'z+1/2, x+1/2, y+1/2'
 '-z+1/2, x+1/2, -y+1/2'
 '-z+1/2, -x+1/2, y+1/2'
 'z+1/2, -x+1/2, -y+1/2'
 'x+1/2, z+1/2, y+1/2'
 'x+1/2, -z+1/2, -y+1/2'
 '-x+1/2, z+1/2, -y+1/2'
 '-x+1/2, -z+1/2, y+1/2'
 
_cell_length_a                    10.8601(3)
_cell_length_b                    10.8601(3)
_cell_length_c                    10.8601(3)
_cell_angle_alpha                 90
_cell_angle_beta                  90
_cell_angle_gamma                 90
_cell_volume                      1280.86(11)
_cell_formula_units_Z             2
_cell_measurement_temperature     293(2)
_cell_measurement_reflns_used     4819
_cell_measurement_theta_min       2.607
_cell_measurement_theta_max       29.80
 
_exptl_crystal_description        'anhedral'
_exptl_crystal_colour             'black'
_exptl_crystal_density_meas       'not measured'
_exptl_crystal_density_method     ?
_exptl_crystal_density_diffrn     5.045          
_exptl_crystal_F_000              1754.5
_exptl_transmission_factor_min    ?
_exptl_transmission_factor_max    ?
_exptl_crystal_size_max           0.050
_exptl_crystal_size_mid           0.040
_exptl_crystal_size_min           0.030
_exptl_absorpt_coefficient_mu     14.702
_shelx_estimated_absorpt_T_min    ?
_shelx_estimated_absorpt_T_max    ?
_exptl_absorpt_correction_type    multi-scan
_exptl_absorpt_correction_T_min   0.915
_exptl_absorpt_correction_T_max   0.946
_exptl_absorpt_process_details    
;
 SADABS 2016/2: Krause, L., Herbst-Irmer, R., Sheldrick G.M. & Stalke D.,
 J. Appl. Cryst. 48 (2015) 3-10
;
_exptl_absorpt_special_details    ?
_diffrn_ambient_temperature       293(2)
_diffrn_radiation_wavelength      0.71073
_diffrn_radiation_type            MoK\a
_diffrn_source                    'micro-focus'
_diffrn_measurement_device_type   'Supernova Rigaku Oxford'
_diffrn_reflns_number             19315
_diffrn_reflns_av_unetI/netI      0.0228
_diffrn_reflns_av_R_equivalents   0.1026
_diffrn_reflns_limit_h_min        -16
_diffrn_reflns_limit_h_max        15
_diffrn_reflns_limit_k_min        -16
_diffrn_reflns_limit_k_max        16
_diffrn_reflns_limit_l_min        -16
_diffrn_reflns_limit_l_max        16
_diffrn_reflns_theta_min          2.652
_diffrn_reflns_theta_max          31.708
_diffrn_reflns_theta_full         25.242
_diffrn_measured_fraction_theta_max   1.000
_diffrn_measured_fraction_theta_full  1.000
_diffrn_reflns_Laue_measured_fraction_max    1.000
_diffrn_reflns_Laue_measured_fraction_full   1.000
_diffrn_reflns_point_group_measured_fraction_max   1.000
_diffrn_reflns_point_group_measured_fraction_full  1.000
_reflns_number_total              438
_reflns_number_gt                 400
_reflns_threshold_expression      'I > 2\s(I)'
_reflns_Friedel_coverage          0.759
_reflns_Friedel_fraction_max      1.000
_reflns_Friedel_fraction_full     1.000
 
_reflns_special_details
;
 Reflections were merged by SHELXL according to the crystal
 class for the calculation of statistics and refinement.
 
 _reflns_Friedel_fraction is defined as the number of unique
 Friedel pairs measured divided by the number that would be
 possible theoretically, ignoring centric projections and
 systematic absences.
;
 
_computing_data_collection        'Crysalis Pro'
_computing_cell_refinement        'Crysalis Pro'
_computing_data_reduction         'Crysalis Pro'
_computing_structure_refinement 'SHELXL-2018/1 (Sheldrick, 2018)'
_computing_molecular_graphics     ?
_computing_publication_material   ?
_refine_special_details
;
 Refined as a 2-component inversion twin.
;
_refine_ls_structure_factor_coef  Fsqd
_refine_ls_matrix_type            full
_refine_ls_weighting_scheme       calc
_refine_ls_weighting_details
'w=1/[\s^2^(Fo^2^)+(0.0776P)^2^+18.2805P] where P=(Fo^2^+2Fc^2^)/3'
_atom_sites_solution_primary      ?
_atom_sites_solution_secondary    ?
_atom_sites_solution_hydrogens    .
_refine_ls_hydrogen_treatment     undef
_refine_ls_extinction_method      none
_refine_ls_extinction_coef        .
_refine_ls_abs_structure_details
;
 Refined as an inversion twin.
;
_refine_ls_abs_structure_Flack    0.00(11)
_chemical_absolute_configuration  ?
_refine_ls_number_reflns          438
_refine_ls_number_parameters      22
_refine_ls_number_restraints      0
_refine_ls_R_factor_all           0.0618
_refine_ls_R_factor_gt            0.0551
_refine_ls_wR_factor_ref          0.1616
_refine_ls_wR_factor_gt           0.1578
_refine_ls_goodness_of_fit_ref    1.160
_refine_ls_restrained_S_all       1.160
_refine_ls_shift/su_max           0.000
_refine_ls_shift/su_mean          0.000
 
loop_
 _atom_site_label
 _atom_site_type_symbol
 _atom_site_fract_x
 _atom_site_fract_y
 _atom_site_fract_z
 _atom_site_U_iso_or_equiv
 _atom_site_adp_type
 _atom_site_occupancy
 _atom_site_site_symmetry_order  
 _atom_site_calc_flag
 _atom_site_refinement_flags_posn
 _atom_site_refinement_flags_adp
 _atom_site_refinement_flags_occupancy
 _atom_site_disorder_assembly
 _atom_site_disorder_group
M2A Ag 0.2138(4) 0.000000 0.000000 0.0555(10) Uani 0.511(5) 4 d S T P . .
M2B Ag 0.2160(6) -0.0734(6) 0.0734(6) 0.0555(10) Uani 0.244(3) 2 d S T P . .
M1AG Ag 0.250000 0.500000 0.000000 0.0470(8) Uani 0.73(2) 4 d S T P . .
M1FE Fe 0.250000 0.500000 0.000000 0.0470(8) Uani 0.27(2) 4 d S T P . .
X3AS As 0.2537(2) 0.2537(2) 0.2537(2) 0.0346(7) Uani 0.895 6 d S T P . .
X3SB Sb 0.2537(2) 0.2537(2) 0.2537(2) 0.0346(7) Uani 0.105 6 d S T P . .
S1 S 0.1233(3) 0.1233(3) 0.3518(4) 0.0397(11) Uani 1 2 d S T P . .
S2 S 0.000000 0.000000 0.000000 0.050(3) Uani 1 24 d S T P . .
 
loop_
 _atom_site_aniso_label
 _atom_site_aniso_U_11
 _atom_site_aniso_U_22
 _atom_site_aniso_U_33
 _atom_site_aniso_U_23
 _atom_site_aniso_U_13
 _atom_site_aniso_U_12
M2A 0.0383(16) 0.0641(13) 0.0641(13) -0.021(2) 0.000 0.000
M2B 0.0383(16) 0.0641(13) 0.0641(13) -0.021(2) 0.000 0.000
M1AG 0.0600(15) 0.0405(9) 0.0405(9) 0.000 0.000 0.000
M1FE 0.0600(15) 0.0405(9) 0.0405(9) 0.000 0.000 0.000
X3AS 0.0346(7) 0.0346(7) 0.0346(7) 0.0020(5) 0.0020(5) 0.0020(5)
X3SB 0.0346(7) 0.0346(7) 0.0346(7) 0.0020(5) 0.0020(5) 0.0020(5)
S1 0.0417(17) 0.0417(17) 0.036(2) 0.0034(11) 0.0034(11) -0.0059(17)
S2 0.050(3) 0.050(3) 0.050(3) 0.000 0.000 0.000
 
_geom_special_details
;
 All esds (except the esd in the dihedral angle between two l.s. planes)
 are estimated using the full covariance matrix.  The cell esds are taken
 into account individually in the estimation of esds in distances, angles
 and torsion angles; correlations between esds in cell parameters are only
 used when they are defined by crystal symmetry.  An approximate (isotropic)
 treatment of cell esds is used for estimating esds involving l.s. planes.
;
 
loop_
 _geom_bond_atom_site_label_1
 _geom_bond_atom_site_label_2
 _geom_bond_distance
 _geom_bond_site_symmetry_2
 _geom_bond_publ_flag
M2A M2B 1.127(9) 2 ?
M2A M2B 1.128(9) . ?
M2A S2 2.322(4) . ?
M2A S1 2.415(5) 14 ?
M2A S1 2.415(5) 13 ?
M2A M2B 2.909(5) 12 ?
M2A M2B 2.909(5) 6 ?
M2A M2B 2.909(5) 10 ?
M2A M2B 2.909(5) 7 ?
M2A M2A 3.283(6) 11 ?
M2A M2A 3.283(6) 5 ?
M2A M2A 3.283(6) 7 ?
M2B M2B 2.191(12) 6 ?
M2B M2B 2.191(12) 10 ?
M2B M2B 2.254(17) 2 ?
M2B S2 2.603(7) . ?
M2B S1 2.651(6) 14 ?
M2B S1 2.651(6) 13 ?
M2B X3AS 2.676(9) 28_545 ?
M1AG S1 2.505(3) 28 ?
M1AG S1 2.505(3) 9 ?
M1AG S1 2.505(3) 27_554 ?
M1AG S1 2.505(3) 11_565 ?
X3AS S1 2.269(4) . ?
X3AS S1 2.269(4) 14 ?
X3AS S1 2.269(4) 9 ?
 
loop_
 _geom_angle_atom_site_label_1
 _geom_angle_atom_site_label_2
 _geom_angle_atom_site_label_3
 _geom_angle
 _geom_angle_site_symmetry_1
 _geom_angle_site_symmetry_3
 _geom_angle_publ_flag
M2B M2A M2B 177.5(8) 2 . ?
M2B M2A S2 91.2(4) 2 . ?
M2B M2A S2 91.2(4) . . ?
M2B M2A S1 89.2(3) 2 14 ?
M2B M2A S1 89.2(3) . 14 ?
S2 M2A S1 128.37(13) . 14 ?
M2B M2A S1 89.2(3) 2 13 ?
M2B M2A S1 89.2(3) . 13 ?
S2 M2A S1 128.37(13) . 13 ?
S1 M2A S1 103.3(3) 14 13 ?
M2B M2A M2B 41.2(3) 2 12 ?
M2B M2A M2B 140.8(4) . 12 ?
S2 M2A M2B 58.40(16) . 12 ?
S1 M2A M2B 128.35(16) 14 12 ?
S1 M2A M2B 91.72(9) 13 12 ?
M2B M2A M2B 140.8(4) 2 6 ?
M2B M2A M2B 41.2(3) . 6 ?
S2 M2A M2B 58.40(16) . 6 ?
S1 M2A M2B 128.35(16) 14 6 ?
S1 M2A M2B 91.72(9) 13 6 ?
M2B M2A M2B 99.6(4) 12 6 ?
M2B M2A M2B 140.8(4) 2 10 ?
M2B M2A M2B 41.2(3) . 10 ?
S2 M2A M2B 58.40(16) . 10 ?
S1 M2A M2B 91.72(9) 14 10 ?
S1 M2A M2B 128.35(16) 13 10 ?
M2B M2A M2B 116.8(3) 12 10 ?
M2B M2A M2B 44.2(2) 6 10 ?
M2B M2A M2B 41.2(3) 2 7 ?
M2B M2A M2B 140.8(4) . 7 ?
S2 M2A M2B 58.40(16) . 7 ?
S1 M2A M2B 91.72(9) 14 7 ?
S1 M2A M2B 128.35(16) 13 7 ?
M2B M2A M2B 44.2(2) 12 7 ?
M2B M2A M2B 116.8(3) 6 7 ?
M2B M2A M2B 99.6(4) 10 7 ?
M2B M2A M2A 61.0(3) 2 11 ?
M2B M2A M2A 121.0(3) . 11 ?
S2 M2A M2A 45.0 . 11 ?
S1 M2A M2A 146.19(6) 14 11 ?
S1 M2A M2A 92.69(11) 13 11 ?
M2B M2A M2A 19.82(18) 12 11 ?
M2B M2A M2A 79.81(18) 6 11 ?
M2B M2A M2A 101.52(14) 10 11 ?
M2B M2A M2A 55.65(9) 7 11 ?
M2B M2A M2A 121.0(3) 2 5 ?
M2B M2A M2A 61.0(3) . 5 ?
S2 M2A M2A 45.0 . 5 ?
S1 M2A M2A 146.19(6) 14 5 ?
S1 M2A M2A 92.69(11) 13 5 ?
M2B M2A M2A 79.81(18) 12 5 ?
M2B M2A M2A 19.82(18) 6 5 ?
M2B M2A M2A 55.65(9) 10 5 ?
M2B M2A M2A 101.52(14) 7 5 ?
M2A M2A M2A 60.0 11 5 ?
M2B M2A M2A 61.0(3) 2 7 ?
M2B M2A M2A 121.0(3) . 7 ?
S2 M2A M2A 45.0 . 7 ?
S1 M2A M2A 92.69(11) 14 7 ?
S1 M2A M2A 146.19(6) 13 7 ?
M2B M2A M2A 55.65(9) 12 7 ?
M2B M2A M2A 101.52(14) 6 7 ?
M2B M2A M2A 79.81(18) 10 7 ?
M2B M2A M2A 19.82(18) 7 7 ?
M2A M2A M2A 60.0 11 7 ?
M2A M2A M2A 90.0 5 7 ?
M2A M2B M2B 119.0(3) . 6 ?
M2A M2B M2B 119.0(3) . 10 ?
M2B M2B M2B 60.0 6 10 ?
M2A M2B M2B 1.2(4) . 2 ?
M2B M2B M2B 120.0 6 2 ?
M2B M2B M2B 120.0 10 2 ?
M2A M2B S2 63.1(4) . . ?
M2B M2B S2 65.11(15) 6 . ?
M2B M2B S2 65.11(15) 10 . ?
M2B M2B S2 64.34(18) 2 . ?
M2A M2B S1 65.6(3) . 14 ?
M2B M2B S1 164.34(13) 6 14 ?
M2B M2B S1 104.40(13) 10 14 ?
M2B M2B S1 64.84(18) 2 14 ?
S2 M2B S1 108.5(2) . 14 ?
M2A M2B S1 65.6(3) . 13 ?
M2B M2B S1 104.40(14) 6 13 ?
M2B M2B S1 164.34(13) 10 13 ?
M2B M2B S1 64.84(18) 2 13 ?
S2 M2B S1 108.5(2) . 13 ?
S1 M2B S1 91.1(3) 14 13 ?
M2A M2B X3AS 174.2(5) . 28_545 ?
M2B M2B X3AS 65.84(12) 6 28_545 ?
M2B M2B X3AS 65.84(12) 10 28_545 ?
M2B M2B X3AS 172.95(14) 2 28_545 ?
S2 M2B X3AS 122.7(3) . 28_545 ?
S1 M2B X3AS 110.7(2) 14 28_545 ?
S1 M2B X3AS 110.7(2) 13 28_545 ?
M2A M2B M2A 99.2(4) . 5 ?
M2B M2B M2A 19.82(18) 6 5 ?
M2B M2B M2A 67.88(10) 10 5 ?
M2B M2B M2A 100.18(18) 2 5 ?
S2 M2B M2A 49.44(13) . 5 ?
S1 M2B M2A 157.9(3) 14 5 ?
S1 M2B M2A 96.93(11) 13 5 ?
X3AS M2B M2A 85.6(2) 28_545 5 ?
M2A M2B M2A 99.2(4) . 9 ?
M2B M2B M2A 67.88(10) 6 9 ?
M2B M2B M2A 19.82(18) 10 9 ?
M2B M2B M2A 100.18(18) 2 9 ?
S2 M2B M2A 49.44(13) . 9 ?
S1 M2B M2A 96.93(11) 14 9 ?
S1 M2B M2A 157.9(3) 13 9 ?
X3AS M2B M2A 85.6(2) 28_545 9 ?
M2A M2B M2A 68.71(18) 5 9 ?
S1 M1AG S1 107.56(8) 28 9 ?
S1 M1AG S1 113.37(17) 28 27_554 ?
S1 M1AG S1 107.56(8) 9 27_554 ?
S1 M1AG S1 107.56(8) 28 11_565 ?
S1 M1AG S1 113.37(17) 9 11_565 ?
S1 M1AG S1 107.56(8) 27_554 11_565 ?
S1 X3AS S1 101.34(16) . 14 ?
S1 X3AS S1 101.34(16) . 9 ?
S1 X3AS S1 101.34(16) 14 9 ?
S1 X3AS M2B 100.67(14) . 28 ?
S1 X3AS M2B 144.9(2) 14 28 ?
S1 X3AS M2B 100.68(14) 9 28 ?
S1 X3AS M2B 144.9(2) . 35 ?
S1 X3AS M2B 100.68(14) 14 35 ?
S1 X3AS M2B 100.68(14) 9 35 ?
M2B X3AS M2B 48.3(2) 28 35 ?
S1 X3AS M2B 100.67(14) . 29 ?
S1 X3AS M2B 100.68(14) 14 29 ?
S1 X3AS M2B 144.9(2) 9 29 ?
M2B X3AS M2B 48.3(2) 28 29 ?
M2B X3AS M2B 48.3(2) 35 29 ?
X3AS S1 M2A 113.6(2) . 9 ?
X3AS S1 M1AG 107.00(11) . 29_455 ?
M2A S1 M1AG 114.01(12) 9 29_455 ?
X3AS S1 M1AG 107.00(11) . 27 ?
M2A S1 M1AG 114.01(12) 9 27 ?
M1AG S1 M1AG 100.05(16) 29_455 27 ?
X3AS S1 M2B 111.7(2) . 9 ?
M2A S1 M2B 25.16(18) 9 9 ?
M1AG S1 M2B 92.23(18) 29_455 9 ?
M1AG S1 M2B 133.7(2) 27 9 ?
X3AS S1 M2B 111.7(2) . 10 ?
M2A S1 M2B 25.16(18) 9 10 ?
M1AG S1 M2B 133.7(2) 29_455 10 ?
M1AG S1 M2B 92.23(18) 27 10 ?
M2B S1 M2B 50.3(4) 9 10 ?
M2A S2 M2A 90.0 . 11 ?
M2A S2 M2A 90.0 . 9 ?
M2A S2 M2A 180.0 11 9 ?
M2A S2 M2A 180.0 . 3 ?
M2A S2 M2A 90.0 11 3 ?
M2A S2 M2A 90.0 9 3 ?
M2A S2 M2A 90.0 . 5 ?
M2A S2 M2A 90.0 11 5 ?
M2A S2 M2A 90.0 9 5 ?
M2A S2 M2A 90.0 3 5 ?
M2A S2 M2A 90.0 . 7 ?
M2A S2 M2A 90.0 11 7 ?
M2A S2 M2A 90.0 9 7 ?
M2A S2 M2A 90.0 3 7 ?
M2A S2 M2A 180.0 5 7 ?
M2A S2 M2B 107.83(12) . 11 ?
M2A S2 M2B 25.66(18) 11 11 ?
M2A S2 M2B 154.34(18) 9 11 ?
M2A S2 M2B 72.17(12) 3 11 ?
M2A S2 M2B 72.17(12) 5 11 ?
M2A S2 M2B 107.83(12) 7 11 ?
M2A S2 M2B 107.83(12) . 5 ?
M2A S2 M2B 72.17(12) 11 5 ?
M2A S2 M2B 107.83(12) 9 5 ?
M2A S2 M2B 72.17(12) 3 5 ?
M2A S2 M2B 25.66(18) 5 5 ?
M2A S2 M2B 154.34(18) 7 5 ?
M2B S2 M2B 49.8(3) 11 5 ?
M2A S2 M2B 154.34(18) . 4 ?
M2A S2 M2B 72.17(12) 11 4 ?
M2A S2 M2B 107.83(12) 9 4 ?
M2A S2 M2B 25.66(18) 3 4 ?
M2A S2 M2B 72.17(12) 5 4 ?
M2A S2 M2B 107.83(12) 7 4 ?
M2B S2 M2B 49.8(3) 11 4 ?
M2B S2 M2B 49.8(3) 5 4 ?
M2A S2 M2B 72.17(12) . 10 ?
M2A S2 M2B 154.34(18) 11 10 ?
M2A S2 M2B 25.66(18) 9 10 ?
M2A S2 M2B 107.83(12) 3 10 ?
M2A S2 M2B 72.17(12) 5 10 ?
M2A S2 M2B 107.83(12) 7 10 ?
M2B S2 M2B 144.3(2) 11 10 ?
M2B S2 M2B 95.38(7) 5 10 ?
M2B S2 M2B 117.27(10) 4 10 ?
M2A S2 M2B 107.83(12) . 9 ?
M2A S2 M2B 154.34(18) 11 9 ?
M2A S2 M2B 25.66(18) 9 9 ?
M2A S2 M2B 72.17(12) 3 9 ?
M2A S2 M2B 107.83(12) 5 9 ?
M2A S2 M2B 72.17(12) 7 9 ?
M2B S2 M2B 144.3(2) 11 9 ?
M2B S2 M2B 117.27(10) 5 9 ?
M2B S2 M2B 95.38(7) 4 9 ?
M2B S2 M2B 51.3(4) 10 9 ?
M2A S2 M2B 25.66(18) . 2 ?
M2A S2 M2B 72.17(12) 11 2 ?
M2A S2 M2B 107.83(12) 9 2 ?
M2A S2 M2B 154.34(18) 3 2 ?
M2A S2 M2B 107.83(12) 5 2 ?
M2A S2 M2B 72.17(12) 7 2 ?
M2B S2 M2B 95.38(7) 11 2 ?
M2B S2 M2B 117.27(10) 5 2 ?
M2B S2 M2B 144.3(2) 4 2 ?
M2B S2 M2B 95.38(7) 10 2 ?
M2B S2 M2B 117.27(10) 9 2 ?
 
_refine_diff_density_max    1.698
_refine_diff_density_min   -0.956
_refine_diff_density_rms    0.265

_shelx_res_file
;

TITL   zvestovite-(Fe)
    shelx.res
    created by SHELXL-2018/1 at 13:10:14 on 05-Mar-2024
CELL   0.71073  10.8601  10.8601  10.8601  90.000  90.000  90.000
ZERR     1       0.0003   0.0003   0.0003   0.000   0.000   0.000
LATT   -2
SYMM   +X,-Y,-Z
SYMM   -X,-Y,+Z
SYMM   -X,+Y,-Z
SYMM   +Y,-X,-Z
SYMM   -Y,-X,+Z
SYMM   -Y,+X,-Z
SYMM   +Y,+X,+Z
SYMM   +Y,+Z,+X
SYMM   -Y,-Z,+X
SYMM   +Y,-Z,-X
SYMM   -Y,+Z,-X
SYMM   +Z,-Y,-X
SYMM   +Z,+Y,+X
SYMM   -Z,+Y,-X
SYMM   -Z,-Y,+X
SYMM   +Z,+X,+Y
SYMM   -Z,+X,-Y
SYMM   -Z,-X,+Y
SYMM   +Z,-X,-Y
SYMM   +X,+Z,+Y
SYMM   +X,-Z,-Y
SYMM   -X,+Z,-Y
SYMM   -X,-Z,+Y
SFAC  Ag   As   Fe   S    Sb Cu
UNIT  1    1    1    1    1   1
L.S. 10
ACTA
TWIN
BOND
FMAP 2
PLAN 20
EADP M2a M2b
EXYZ M1AG M1FE
EADP M1AG M1Fe
EXYZ X3AS X3SB
EADP X3AS X3Sb
WGHT    0.077600   18.280500
BASF   0.00250
FVAR       0.10361   0.51125   0.73352
M2A   1    0.213782    0.000000    0.000000    20.25000    0.03833    0.06414 =
         0.06414   -0.02071    0.00000    0.00000
M2B   1    0.216035   -0.073396    0.073396   -20.25000    0.03833    0.06414 =
         0.06414   -0.02071    0.00000    0.00000
M1AG  1    0.250000    0.500000    0.000000    30.25000    0.05999    0.04050 =
         0.04050    0.00000    0.00000    0.00000
M1FE  3    0.250000    0.500000    0.000000   -30.25000    0.05999    0.04050 =
         0.04050    0.00000    0.00000    0.00000
X3AS  2    0.253710    0.253710    0.253710    10.14917    0.03457    0.03457 =
         0.03457    0.00204    0.00204    0.00204
X3SB  5    0.253710    0.253710    0.253710    10.01750    0.03457    0.03457 =
         0.03457    0.00204    0.00204    0.00204
S1    4    0.123293    0.123293    0.351808    10.50000    0.04173    0.04173 =
         0.03558    0.00340    0.00340   -0.00593
S2    4    0.000000    0.000000    0.000000    10.04167    0.04982    0.04982 =
         0.04982    0.00000    0.00000    0.00000
HKLF  4


REM    zvestovite-(Fe)
REM R1 =  0.0551 for     400 Fo > 4sig(Fo)  and  0.0618 for all     438 data
REM     22 parameters refined using      0 restraints

END

WGHT      0.0775     18.2997

REM Highest difference peak  1.698,  deepest hole -0.956,  1-sigma level  0.265
Q1    1   0.2468 -0.0401  0.0401  10.50000  0.05    1.70
Q2    1   0.1804 -0.1188  0.0878  11.00000  0.05    1.58
Q3    1   0.3032  0.2278  0.2278  10.50000  0.05    0.96
Q4    1   0.2885  0.2885  0.2885  10.16667  0.05    0.91
Q5    1   0.1872 -0.1415 -0.0751  11.00000  0.05    0.86
Q6    1   0.0265  0.0518  0.0518  10.50000  0.05    0.77
Q7    1   0.1985  0.5000  0.0000  10.50000  0.05    0.69
Q8    1   0.2769  0.5143 -0.0370  11.00000  0.05    0.69
Q9    1   0.2897  0.0000  0.0000  10.25000  0.05    0.67
Q10   1   0.2475  0.4603  0.0371  11.00000  0.05    0.64
Q11   1   0.1291 -0.0437 -0.0437  10.50000  0.05    0.55
Q12   1   0.1344 -0.0790  0.0200  11.00000  0.05    0.47
Q13   1   0.1541  0.1828  0.3323  11.00000  0.05    0.43
Q14   1   0.1725  0.1725  0.3770  10.50000  0.05    0.37
Q15   1   0.1102 -0.0189  0.1102  10.50000  0.05    0.37
Q16   1   0.2380 -0.1586  0.0160  11.00000  0.05    0.37
Q17   1   0.0889  0.0682  0.3779  11.00000  0.05    0.35
Q18   1   0.1790  0.1337  0.3082  11.00000  0.05    0.33
Q19   1   0.3247 -0.1067  0.1067  10.50000  0.05    0.32
Q20   1   0.1492  0.1050  0.3047  11.00000  0.05    0.30
;
_shelx_res_checksum   66707

_shelx_hkl_file
;
  -1  -1   0 89.1990 7.84943   4
  -1  -1   0 91.0605 7.86637   5
  -1   0  -1 97.6631 7.86039   5
  -1   0   1 90.7754 7.92187   5
   1   1   0 92.1551 7.84612   1
   0  -1  -1 120.845 8.00437   3
  -1   0   1 116.184 7.84948   2
  -1   1   0 102.966 7.93637   2
  -1   1   0 100.417 7.90841  27
   1  -1   0 80.3979 7.84074  28
   1   1   0 73.7801 7.76228  29
  -1   0  -1 75.9957 7.85915  27
   0  -1  -1 91.9298 7.84175  12
  -1   0   1 117.438 7.89692  13
  -1   1   0 75.7006 7.75477  13
  -1  -1   0 100.132 7.85332  14
  -1   1   0 101.072 7.90982   6
   0   1   1 111.733 7.93718   6
  -1   0   1 100.189 7.80807   6
   0  -1  -1 109.205 7.89022  25
   1   0   1 75.0447 7.73984  26
   1   0  -1 109.518 7.92647  24
  -1   0  -1 79.7601 7.91531  25
  -1  -1   0 73.7347 7.94281  23
  -1  -1   0 99.8068 7.91331  21
   0  -1   1 93.6182 7.81382  20
   1   0   1 82.2825 7.75631  20
  -1   0   1 96.4455 7.80367  20
   0   1  -1 85.4859 7.77249  19
   0  -1   1 61.5804 7.77201  16
   1  -1   0 68.6093 7.75603  16
  -1   1   0 82.6676 7.84287  18
  -1   0  -1 76.7377 7.75156  19
   0   1  -1 97.3054 7.84438  15
   0  -1  -1 77.1556 7.83188  15
   1   1   0 102.292 7.80677  15
   1   0  -1 117.397 7.83343  15
   0   1   1 109.195 7.99402   7
   1   1   0 103.847 7.90812   7
   1   0   1 86.7338 7.80347   7
  -1   1   0 69.5240 7.77479  11
  -1   0   1 103.053 7.78729  11
   1   0   1 108.104 8.03114   8
  -1   0  -1 88.4487 7.78840   9
   0  -1   1 73.0345 7.75553   8
   0   1   1 137.624 8.10689   8
  -1   0   1 119.764 7.87952   8
   0   0   2 3.31613 0.50719   2
  -2   0   0 3.31644 0.61861   2
   0  -2   0 2.44849 0.79004  30
  -2   0   0 4.05904 0.86658  27
  -2   0   0 4.82559 0.67380  14
   0   2   0 2.72569 0.86884   7
   0   0  -2 3.90172 0.78821  25
   0   0  -2 4.58605 0.67290  27
   2   0   0 3.37101 0.48770  26
  -2   0   0 4.81500 0.98924  23
   0  -2   0 2.50595 0.74591  23
   0   0  -2 2.83515 0.75094  22
   0   0   2 3.30931 0.59635  20
   0  -2   0 2.02515 1.00382  21
   0   0  -2 3.86502 0.55579  19
   0   2   0 2.84058 0.70675  18
   0  -2   0 3.16605 0.84997  16
   0   0  -2 3.50623 0.58381  15
   0   0   2 4.17345 0.86523   8
   2   0   0 5.17240 0.60920   7
  -2   0   0 5.38548 0.74239   5
  -2   0   0 3.63197 0.58623   6
   0  -2   0 2.57724 0.64853   5
   0   0   2 3.32500 0.45062   6
  -2  -1   1 62.3978 5.61271   5
  -1  -2   1 56.5270 5.59530   5
  -1  -1  -2 79.2418 5.53089   5
  -2  -1   1 69.7884 5.47506   4
  -2   1  -1 66.2528 5.46049   5
  -2  -1  -1 55.6498 5.44948   5
  -1  -2  -1 67.2017 5.41146   5
  -1  -2   1 63.1869 5.52472   4
  -1  -1   2 68.8335 5.42802   4
   2   1   1 53.0860 5.34368   1
   2   1  -1 83.7788 5.52984   1
   1   1  -2 71.4523 5.47252   1
   1  -2  -1 69.9576 5.72344   3
  -2   1   1 75.1732 5.66984   2
  -1   1   2 85.3208 5.63311   2
   1  -1   2 60.6328 5.33300  28
   2  -1   1 63.1760 5.44936  28
  -2   1  -1 62.3037 5.66229  27
  -1   2  -1 66.7751 5.68012  27
   1  -2  -1 54.5650 5.32488  29
  -1   2   1 68.4426 5.44133  27
   2  -1  -1 60.6621 5.46734  29
   2  -1   1 70.3488 5.56318  30
  -2  -1  -1 44.9999 5.44062  27
  -1   1  -2 60.6988 5.58192  27
  -1  -1  -2 46.0689 5.34729  27
   2  -1  -1 62.3381 5.48685  28
  -1   1   2 58.7674 5.56944  13
  -2   1   1 63.8384 5.47839  13
  -2  -1   1 56.0429 5.40896  14
  -1  -2  -1 64.1347 5.57144  12
  -1  -1   2 59.1303 5.41220  13
  -1  -2   1 56.1065 5.33204  14
   1   1   2 54.9483 5.39642   6
  -1   1   2 81.1514 5.55462   6
  -2   1   1 70.3557 5.57725   6
  -1   2   1 63.3638 5.65593   6
   1   1  -2 53.7336 5.58411  24
   2   1  -1 58.7110 5.26435  26
   2  -1  -1 53.4560 5.39562  24
   2   1  -1 62.9866 5.52670  24
  -1   1  -2 51.5425 5.48403  25
  -1  -1  -2 53.0664 5.58537  25
   2  -1  -1 64.4258 5.50969  22
   1  -2   1 58.9085 5.42014  21
  -1  -2  -1 56.9525 5.67174  23
   1  -1  -2 74.0302 5.69835  22
  -1  -2  -1 69.6909 5.88822  21
   1  -1   2 61.6525 5.40327  20
   1   1   2 48.0830 5.32508  20
   1  -2   1 64.8774 5.49921  20
   2  -1   1 63.4167 5.42934  20
  -2  -1   1 53.6935 5.27464  20
  -1  -1   2 63.9511 5.39126  20
   1  -2   1 47.3669 5.36162  16
  -2   1  -1 55.7217 5.34663  19
  -2  -1   1 50.4059 5.37680  16
  -1  -2   1 57.4880 5.48221  16
   2  -1   1 48.4543 5.41100  17
   1  -1   2 58.9825 5.54842  17
   1   1  -2 66.0695 5.29753  19
  -1   1  -2 55.6353 5.34542  19
   2   1  -1 63.1070 5.33641  15
   1  -1  -2 79.7837 5.57213  15
   1   2  -1 69.4343 5.48809  15
   1   1  -2 70.6967 5.43787  15
   2  -1  -1 62.1426 5.45367  15
   1   1   2 56.2737 5.55440   7
   1   2  -1 65.0479 5.52494   7
   2   1   1 54.8608 5.50806   7
   1   2   1 68.7610 5.76236   7
  -1   2  -1 52.9006 5.31691   7
   1   1   2 58.3706 5.76326   8
   1   2   1 57.5985 5.71704   8
  -2  -1  -1 55.6824 5.34026   9
   1  -1   2 61.5431 5.43775   8
  -1   1   2 70.8942 5.52004   8
  -1  -1   2 58.9361 5.42443   8
   2  -1   1 57.2428 5.42900   8
  -1   1  -2 55.1885 5.27779  10
  -1   2  -1 54.7237 5.30060   9
  -2   1  -1 54.9749 5.36204   9
  -2  -1   1 60.2680 5.34720  10
   2   1   1 53.2846 5.67831   8
  -2   1   1 52.0744 5.37044  11
  -2   0  -2 0.65171 0.82562   5
  -2   0   2 2.27397 0.63931   6
  -2   2   0 1.86429 0.56837   5
  -2  -2   0 0.98229 0.88842   5
   2  -2   0 2.06686 1.14128   3
  -2   0   2 1.49534 0.68588   2
  -2  -2   0 0.58573 0.80100   4
  -2   0  -2 1.72018 0.97663  27
   2   2   0 1.78470 0.63190  29
   2  -2   0 0.58329 0.89621  28
   2   2   0 0.79117 0.59496  15
  -2  -2   0 1.51864 0.79338  14
  -2   2   0 0.52823 0.52869  13
   0   2  -2 1.70307 0.76178  15
   0  -2   2 1.22505 0.46171  13
  -2   0   2 2.01459 0.84370  13
   0   2   2 1.23090 1.09813   6
  -2   2   0 1.65969 0.61534   7
  -2   2   0 2.38958 1.02313   6
   0   2   2 0.90641 1.16629   7
   2   0   2 1.05397 0.71644   7
  -2   0  -2 0.67834 1.07359  25
   0  -2  -2 1.11029 0.88101  25
   2   0   2 0.55316 0.39445  26
   2   0  -2 1.23619 0.91177  24
  -2  -2   0 0.13464 1.26185  23
  -2  -2   0 0.39011 0.82339  21
   0  -2   2 1.18555 0.55315  20
   2   0   2 1.42163 0.44352  20
  -2  -2   0 1.34510 0.30732  20
  -2   0  -2 1.45035 0.48411  19
  -2   0   2 1.86302 0.44278  17
   0   2  -2 1.84329 0.54138  19
  -2   2   0 1.74706 0.88429  18
   0  -2  -2 1.04155 0.80503  15
   2   0  -2 1.75124 0.64910  15
  -2   0  -2 0.78391 0.35352  15
   2  -2   0 0.74636 0.53030  16
   0  -2   2 1.06646 0.60477  16
   2   2   0 2.08191 0.94070   7
   0   2   2 1.45397 1.24249   8
   2   0   2 1.30969 1.26033   8
  -2   2   0 1.39304 0.64755  11
   0  -2  -2 2.20280 0.77897  12
  -2   0  -2 1.36625 0.57455   9
  -2   0   2 1.22829 0.49637  11
  -2  -2   2 9691.97 837.897   5
  -2  -2   2 9837.88 837.662   4
  -2   2   2 9332.96 837.430   5
  -2  -2  -2 9606.17 837.582   5
   2  -2   2 9063.22 837.608   3
  -2   2   2 12745.1 837.912   2
   2   2  -2 12571.9 837.761   1
  -2   2  -2 10032.8 837.856  27
  -2   2   2 10565.3 837.484  27
   2  -2  -2 9091.75 837.585  29
   2  -2   2 9185.20 837.562  28
   2  -2  -2 11660.4 837.554  12
  -2   2  -2 9509.72 837.602   6
  -2   2   2 11522.5 837.820   6
   2   2  -2 9233.73 837.722  24
  -2   2  -2 9102.01 837.633  25
   2  -2  -2 10975.2 837.809  22
   2  -2   2 10092.6 837.615  20
  -2  -2   2 9462.86 837.472  20
  -2   2  -2 9421.87 837.543  19
   2   2  -2 9651.17 837.374  19
  -2  -2   2 9621.59 837.583  16
   2  -2   2 9685.13 837.725  17
  -2   2  -2 9293.91 837.577  15
   2  -2  -2 11158.0 837.779  15
  -2  -2  -2 7708.27 837.471  15
   2   2  -2 10357.4 837.586  15
   2   2   2 9567.52 837.817   7
   2   2   2 9448.66 837.956   8
   2  -2   2 9243.12 837.454   8
  -2  -2   2 9280.81 837.400  10
  -2   2  -2 9316.43 837.504   9
  -2   2   2 9582.95 837.534   8
  -3  -1   0 26.5772 2.56322   5
   0  -3  -1 22.1334 2.14338   5
  -3   0  -1 20.9401 2.40377   5
   0  -1   3 22.4869 2.20393   4
  -1  -3   0 17.8364 2.33836   5
   0   1   3 24.7303 2.36141   2
  -1   0   3 23.0476 2.30688   2
   3   1   0 22.6640 2.38199   1
  -3   0  -1 20.1955 2.21867   2
   0   1  -3 28.7834 2.30282   1
  -3   0   1 24.6539 2.39378   2
   1  -3   0 22.2720 3.03830   3
  -1   0  -3 24.8112 2.56008  27
   3   0  -1 29.0464 2.61187  29
   0  -1  -3 20.7463 2.16455  27
  -3   0  -1 20.4955 2.58622  27
  -3   1   0 24.2184 2.66619  27
  -1   0   3 18.9044 2.47764  13
  -3  -1   0 21.2213 2.40558  14
   0  -1   3 22.1941 2.44348  13
   0   1   3 20.9549 2.25075   6
   0   3   1 20.4894 2.94060   6
  -1   3   0 22.7343 2.99894   6
   0   3   1 18.5094 2.79254   7
  -1   0   3 21.0622 2.22703   6
   0  -1  -3 22.2289 2.58546  25
   3   0   1 23.4947 2.20853  26
   0   3  -1 13.5621 2.19134  24
   3   1   0 24.3600 2.20044  26
   3   0  -1 27.1127 2.50094  24
  -1   0  -3 21.9465 2.72011  25
   0  -1   3 23.1339 2.03970  26
  -1  -3   0 21.0007 2.71580  21
   0  -3   1 19.2960 2.50139  21
  -1   0  -3 22.1732 2.44836  22
   0  -3  -1 17.6262 2.45092  23
   3  -1   0 23.2324 2.23663  22
   0  -1  -3 20.9873 2.62599  22
  -1  -3   0 17.3475 2.63266  23
   1   0  -3 23.3058 2.46906  22
  -3   1   0 20.0220 2.47208  23
  -3  -1   0 18.5788 2.81913  23
   0   1   3 21.1382 2.35128  20
  -1   0   3 26.3184 2.38467  20
   0  -1   3 22.2573 2.36012  20
   0  -3   1 21.9246 2.37020  20
   1   0  -3 25.9976 2.27231  19
   1  -3   0 18.4229 2.65921  21
   1   0   3 25.4288 2.32642  20
   0  -3  -1 21.4844 2.97191  21
   3   0   1 24.7521 2.17120  20
  -3   1   0 29.2571 2.40462  18
  -3  -1   0 23.4956 2.04405  19
  -1   0  -3 25.7877 2.29184  19
  -1  -3   0 17.2651 2.59249  16
   3  -1   0 21.5794 2.21460  17
   0  -1   3 22.0333 2.59671  17
  -3   0  -1 25.8185 2.19395  19
   0   1  -3 22.8591 2.23334  19
   1  -3   0 21.4253 2.44675  16
   0  -3   1 22.8966 2.49614  16
  -1   3   0 19.9324 2.48569  18
   3  -1   0 19.7130 2.25738  15
   1   0  -3 29.9073 2.41926  15
   3   0  -1 24.6984 2.21472  15
   3   1   0 25.3550 2.11911  15
   0  -1  -3 21.9738 2.36266  15
   0   1  -3 23.7117 2.33967  15
   0   3  -1 19.9475 2.49548  15
   0   1   3 25.9285 2.67976   7
   0   3   1 18.6661 2.78427   8
   1   0   3 22.2154 2.42312   7
   3   0   1 24.5211 2.33048   7
   3   1   0 20.5647 2.39716   7
   1   3   0 21.4371 2.63059   7
  -1   3   0 21.2320 2.64403   7
  -3   0  -1 25.0645 2.33560   9
   0   1   3 28.2404 2.80775   8
  -3   0  -1 25.3347 2.36002  10
   3   0   1 21.7577 2.62636   8
  -3  -1   0 25.2902 2.35587  10
  -1   0   3 27.2551 2.49194   8
   0  -1   3 23.2918 2.39982   8
  -1   3   0 20.7920 2.28279   8
   1   0   3 24.9973 2.78817   8
  -3  -2  -1 16.9703 1.95445   4
  -2   1   3 16.3703 2.32171   5
  -3  -1   2 16.1992 2.36376   5
  -2  -1  -3 21.9280 2.28811   5
  -2  -3   1 17.3278 2.31244   5
  -1  -3  -2 16.9173 1.77914   5
  -3   1  -2 16.6959 2.07370   5
  -1  -2   3 14.7019 1.85936   4
  -3   2   1 14.9604 1.69158   5
  -3  -2  -1 15.9845 1.99859   5
   3   1   2 13.8547 1.70576   1
  -3   2   1 21.7564 2.53916   2
  -3   1  -2 12.5125 1.75881   2
  -2   1   3 18.6724 2.14574   2
   2  -3  -1 17.8602 2.58329   3
  -2  -3   1 14.4479 2.20537   4
   3   2  -1 14.4902 2.06953   1
  -2  -1  -3 11.4631 2.04382  27
   3  -2   1 18.7198 2.07854  28
   3  -1  -2 17.8291 2.18234  29
   2   3   1 15.1985 1.57923  29
   2  -1   3 17.4010 1.71129  28
  -3   2   1 18.4133 2.21054  27
  -3   1  -2 13.2622 2.32689  27
  -1  -2   3 18.6453 1.85819  13
  -2   3  -1 12.2480 1.47918  14
  -3   2   1 18.7279 2.02615  13
  -1  -3  -2 16.8634 2.17141  12
  -2   1   3 17.4004 2.26839  13
  -2  -3   1 15.9683 1.89286  14
   3   1   2 16.6090 2.29307   7
  -3   1  -2 14.4654 1.64571   6
  -2   1   3 20.2884 2.04353   6
   1   2   3 15.8050 2.06796   6
  -1   3   2 19.3043 2.52419   6
   2   3   1 17.0189 2.42177   7
  -3   2   1 16.7438 2.22750   6
   1   2   3 16.3767 2.48797   7
   2   1  -3 18.7626 2.39032  24
  -3   1  -2 10.9114 2.20325  25
  -2   3  -1 16.9342 2.41876  27
  -1   2  -3 19.0435 2.61309  27
  -2   3  -1 15.8620 1.79111  25
   2  -1   3 16.4380 1.61068  26
   3   1   2 16.0716 1.72839  26
  -2  -1  -3 11.7559 2.54145  25
   1   3  -2 17.7830 2.21839  24
   3   2  -1 19.2282 2.11707  24
   3  -1  -2 14.3429 2.03353  24
   1  -2  -3 18.5085 2.08105  25
   2   1  -3 15.6120 1.43469  26
  -3  -2  -1 16.8268 2.06621  21
   1  -2  -3 16.7460 2.50975  22
  -3  -2  -1 13.6520 2.54536  23
   3  -2   1 13.5080 1.70178  21
  -2  -3   1 19.6774 2.35092  21
   3  -1  -2 14.5171 2.12483  22
   1  -3   2 20.2321 2.00414  20
  -3  -2  -1 16.7677 1.57713  19
   3   1   2 12.8172 1.53618  20
   2  -1   3 18.2397 1.84309  20
  -2  -3   1 14.1594 1.66011  20
  -3  -1   2 16.5267 1.72925  20
   3  -2   1 16.2138 1.95502  20
  -1  -3  -2 20.0975 2.88461  21
  -1   2  -3 17.4397 1.80976  19
   2  -3  -1 16.1612 1.96378  16
   2  -1   3 14.0943 2.15953  17
   2   1  -3 18.2462 1.63839  19
  -3  -1   2 19.0720 1.79363  16
   3  -1  -2 17.8714 2.01876  15
   1   3  -2 16.9124 2.02012  15
  -2  -1  -3 13.9820 1.68240  15
  -3   1  -2 16.9615 1.72081  15
   3   2  -1 16.8055 1.80798  15
   1  -3   2 11.6951 1.87966  16
   2   1  -3 20.2292 1.88789  15
   1  -2  -3 19.3093 2.15869  15
   2   3   1 11.1367 2.38331   8
   2  -1   3 14.5402 2.19756   8
   1   2   3 16.7288 2.85927   8
   3   2  -1 15.7522 2.01145   7
  -1   3   2 16.4014 2.35108   8
   3   1   2 14.4799 2.59675   8
  -2   3  -1 17.7777 1.92275   7
  -1   2  -3 17.2849 1.57331  10
  -2   3  -1 14.7180 1.77072  11
  -3  -2  -1 18.9755 1.74696   9
   3  -2   1 16.4275 1.81639   8
  -2   1   3 16.8479 2.03825   8
  -3   1  -2 16.1665 1.79825   9
  -3   2   1 17.0367 1.93030  11
  -3  -1  -2 13.8224 1.67601   4
  -1  -3   2 13.8946 2.23783   5
  -2  -1   3 16.2850 2.63742   5
  -3  -1  -2 17.4537 2.02600   5
  -3   2  -1 21.3948 1.95892   5
  -2  -3  -1 17.2470 1.98152   5
  -3  -2   1 12.6863 2.13052   5
  -3  -2   1 15.6675 2.00698   4
  -3   1   2 16.1645 1.93019   5
  -3   1   2 16.3777 2.18959   2
   3   1  -2 22.3777 2.13352   1
  -3   2  -1 16.3960 2.16154   2
   1  -3  -2 12.7789 2.51044   3
   2  -3   1 16.1809 2.54452   3
  -1  -3   2 15.5003 2.05886   4
  -1   2   3 23.0511 2.41346   2
  -3   1   2 13.5566 1.97687  27
  -3  -1  -2 12.0449 2.14678  27
  -2   3   1 18.4854 2.18544  27
   2  -3   1 21.1518 2.38752  30
  -2   1  -3 15.8049 2.35996  27
   2  -1  -3 20.2605 1.95446  28
   3  -2  -1 16.5555 2.13389  28
   3  -2  -1 17.7535 2.09792  29
  -3   2  -1 18.6302 2.52488  27
  -1  -3   2 16.9811 1.67527  14
  -2  -1   3 16.0231 1.99676  13
  -3  -2   1 15.3762 1.90590  14
  -1   2   3 21.9998 2.77559  13
   1  -2   3 13.5669 1.79451  13
   1  -3  -2 20.3928 2.15193  12
  -3   2  -1 14.4107 1.70444  14
  -2  -3  -1 19.0917 2.23025  12
  -2   3   1 12.9720 1.98366  13
  -3   1   2 15.9309 2.08033  13
   1   3   2 12.7253 2.47575   6
   1   3   2 16.6946 2.52805   7
  -2   3   1 16.9290 2.11561   7
   3   2   1 13.1610 2.18120   7
  -2   3   1 19.3997 2.52907   6
  -1   2   3 20.4528 2.47906   7
  -3   1   2 19.7106 2.12723   6
   2   1   3 17.1926 1.78681   6
   2   1   3 12.6095 2.28142   7
  -1   2   3 20.1650 2.18652   6
  -3   2  -1 15.6732 2.02322   6
   3   1  -2 20.1605 2.30752  24
   3  -2  -1 13.7745 1.75577  24
   3  -1   2 15.7124 1.68426  26
   3   1  -2 17.0361 1.57331  26
  -1  -2  -3 17.2211 2.38991  25
   1  -3  -2 12.7002 1.75953  25
   2   3  -1 17.0805 2.09437  24
   2  -1  -3 18.1036 2.30826  22
  -2  -3  -1 13.5889 2.49783  23
   3  -2  -1 15.5939 2.10095  22
   2  -3   1 16.1985 2.03855  21
  -3  -2   1 16.0518 2.42545  23
  -2   1  -3 15.7142 1.72381  22
  -3  -1  -2 16.5766 1.99223  21
  -3  -2   1 16.3302 1.57595  20
  -2  -3  -1 16.7265 2.47238  21
   3   1  -2 16.5549 1.51079  19
   2  -3   1 17.9442 2.07763  20
   1  -2   3 15.5605 1.91347  20
   3  -1   2 19.1666 1.81304  20
   2   1   3 13.1872 1.67611  20
   1   2  -3 18.4877 1.71430  19
  -1  -3   2 16.2158 2.01873  16
   3  -2  -1 17.1362 1.70179  16
  -2   1  -3 16.4953 1.79501  19
   2  -3   1 15.4174 1.87406  16
  -3  -1  -2 15.1023 1.64844  19
   2   3  -1 16.6781 1.80995  18
   1  -2   3 13.8864 2.24565  17
   3  -1   2 13.5367 2.01568  17
   2  -1  -3 22.6754 2.09361  15
   3  -2  -1 19.0987 2.08941  15
   2   3  -1 20.3708 2.11830  15
  -2   1  -3 17.1474 1.76970  15
  -1   3  -2 18.3615 2.12802  15
  -1  -2  -3 19.7546 2.06921  15
   3   1  -2 19.1597 1.83382  15
   1   2  -3 18.9519 1.99279  15
  -3  -1  -2 13.2201 1.48473  15
   3  -1   2 13.2794 2.18335   8
   2   3  -1 14.7591 2.20465   7
   2   1   3 14.2175 2.81396   8
   3  -1   2 16.6756 1.61685   7
  -1   3  -2 16.0597 1.80839   7
   1  -2   3 16.9098 1.85582   8
  -1   3  -2 16.3483 1.66388   9
  -1   3  -2 13.4664 1.59944  11
   3   2   1 13.8824 2.44669   8
  -2   1  -3 15.0035 1.79362   9
  -2  -1   3 16.1886 1.60868  11
  -2  -3  -1 16.3965 1.61304   9
  -2   3   1 16.1546 1.70244   8
  -3  -2   1 14.8573 1.81276  10
  -3   1   2 15.0094 1.84415  11
  -3   0   3 491.044 33.1867   5
  -3   0  -3 480.188 32.9345   5
   0  -3   3 408.318 32.7152   4
  -3  -3   0 384.837 32.8533   5
  -3  -3   0 350.878 32.7562   4
  -3   0  -3 343.416 32.3618   2
  -3   0   3 458.190 32.8548   2
   0  -3  -3 425.112 33.0354   3
   3  -3   0 374.702 32.9173   3
   3   0   3 356.517 32.3434   1
   3  -3   0 381.199 32.8314  28
  -3   3   0 395.182 32.9927  27
  -3   0  -3 344.070 32.8931  27
  -3  -3   0 365.463 32.8611  12
  -3   0   3 514.461 32.9879  13
   0  -3   3 401.364 32.4619  13
  -3   3   0 387.449 32.5869  13
   0   3   3 366.866 32.8665   6
   3   0  -3 497.557 33.1108  24
  -3   0  -3 292.823 32.8810  25
   0  -3  -3 298.661 32.6828  25
   3  -3   0 356.717 32.4401  24
  -3  -3   0 334.060 33.0493  23
  -3   3   0 361.396 32.4105  23
  -3   0  -3 413.391 32.6840  21
  -3  -3   0 359.456 32.3549  20
   0  -3   3 383.170 32.6719  20
   3   0   3 372.141 32.5243  20
   3  -3   0 363.239 32.5987  16
   0   3  -3 384.962 32.5849  19
  -3   3   0 368.104 32.8333  18
   0  -3   3 302.196 32.5995  16
   0   3  -3 392.320 32.7609  15
   3   0  -3 516.563 32.8118  15
  -3   0  -3 363.284 32.4368  15
  -3   3   0 366.125 32.5093   7
   3   0   3 344.745 32.5863   7
   3   3   0 382.106 32.8972   7
   0   3   3 388.187 33.0675   7
   3   3   0 319.619 32.8679   8
   3   0   3 364.074 33.0138   8
  -3   0   3 439.934 32.6201  11
  -3   0  -3 378.157 32.6425   9
  -3   2   3 29.9131 2.85563   5
  -3  -2  -3 27.2927 2.78992   4
  -2  -3  -3 26.9172 2.86259   5
  -3   3   2 27.9413 2.49244   5
  -2  -3   3 24.3157 2.93669   4
  -3  -3  -2 26.8785 3.00118   5
  -2  -3   3 25.2455 3.37011   5
  -3  -3   2 26.8798 3.36058   5
  -2   3   3 24.6869 2.60609   5
  -3  -2  -3 26.6362 2.98794   5
  -3  -2   3 25.3868 3.47347   5
  -3  -3   2 28.2579 3.02840   4
  -3  -3  -2 29.8446 3.11256   4
  -3   2   3 38.9316 3.45426   2
   3   3  -2 27.6951 3.15839   1
   3   2  -3 30.9927 3.11176   1
  -3   3   2 31.3459 3.51369   2
   3  -2   3 26.3417 2.88525   3
   3  -3   2 23.4287 3.19256   3
  -3   2   3 27.7156 2.70144  27
   3  -3  -2 26.1133 3.17099  28
   3  -2   3 27.1176 2.81812  28
  -3  -2  -3 23.4063 3.09029  27
   3  -3  -2 27.0067 2.89832  29
   3  -3   2 27.4249 3.02355  28
  -3   2  -3 27.5258 3.46643  27
  -2   3   3 26.7569 2.55970  27
   3  -2  -3 32.7314 3.05278  28
  -3   3   2 22.1251 2.91775  27
   2  -3  -3 30.7370 2.87567  12
  -3   3   2 28.9795 3.12180  13
  -3   2   3 28.0669 3.19951  13
  -3  -3   2 25.6010 2.78475  14
  -3   3   2 27.6977 3.30198   6
  -3   2   3 33.5618 3.22453   6
  -2   3   3 25.5747 3.18279   6
  -3   3  -2 31.9326 3.14486   6
  -2   3  -3 29.3827 3.36566   6
   2   3   3 28.0555 3.17259   6
  -3   2  -3 25.4364 2.65557   6
   2   3   3 22.9527 3.48242   7
   3   2   3 22.3883 3.27772   7
  -2   3  -3 27.4340 3.54765  27
  -3   2  -3 27.1451 3.41586  25
   3  -3  -2 17.5427 2.64960  24
   3   2  -3 30.1917 3.32057  24
  -3   3  -2 24.2244 3.03634  25
  -2   3  -3 26.1933 3.08562  25
   2   3  -3 24.6467 3.29726  24
   2  -3  -3 25.1938 2.80321  25
  -3   3  -2 26.7400 3.48943  27
   3  -2  -3 18.8962 2.87566  24
  -3  -3  -2 20.4408 3.69847  23
   3  -2  -3 30.9185 3.36551  22
   3  -3  -2 27.1878 3.39385  22
   3  -3   2 25.7911 2.56318  21
  -3  -2  -3 30.5029 3.65611  21
   2  -3  -3 26.7528 3.49404  22
  -3  -3  -2 27.9580 3.52398  21
  -3   2  -3 25.1575 2.41347  22
  -3  -2  -3 24.0606 2.67261  19
  -2  -3  -3 20.7253 3.66309  21
  -3  -2   3 26.6552 2.70734  20
   3  -2   3 28.8444 2.83113  20
   3  -3   2 27.5235 2.92163  20
   3   2   3 23.1001 2.55463  20
   2  -3   3 29.7043 2.90722  20
  -3  -3   2 28.4133 2.61417  20
  -2  -3   3 26.2588 2.73070  20
   3   2  -3 25.7052 2.45885  19
  -2  -3   3 25.5334 2.84734  16
  -3   2  -3 32.5446 2.84292  19
  -3  -3   2 31.7434 3.10583  16
   3  -2   3 24.1203 3.10043  17
   2   3  -3 27.1385 2.57782  19
  -3  -2   3 23.6264 2.73126  16
   3  -3   2 21.5402 2.73819  16
  -2   3  -3 29.2883 2.83352  19
  -2   3  -3 25.5528 2.93118  15
   3   3  -2 26.1249 2.87453  15
  -2  -3  -3 21.1118 2.82351  15
  -3   2  -3 25.6652 2.79218  15
   3  -3  -2 26.6424 3.17258  15
  -3  -2  -3 20.9104 2.58738  15
   3   2  -3 27.0087 2.87200  15
   3  -2  -3 40.2528 3.27447  15
   2  -3  -3 31.4361 3.26795  15
   2   3  -3 28.0056 2.94455  15
   3   3   2 26.1814 3.66880   8
   3   3  -2 27.7246 3.12326   7
   3   2   3 28.7872 3.92738   8
   2   3   3 26.0784 3.78135   8
  -2   3  -3 28.2747 2.57886   7
   3   3   2 30.3347 3.55130   7
  -3   2   3 30.8228 2.95434   8
  -3   3   2 22.9889 2.71958   8
  -3  -3  -2 26.7458 2.66836   9
  -3   2  -3 28.5096 2.79385   9
  -3  -2   3 26.0180 2.56879  10
   2  -3   3 24.4977 2.57471   8
  -3   3  -2 27.2065 2.72279   9
   3  -3   2 25.8782 2.52003   8
  -2   3  -3 29.1917 2.71086   9
  -2   3   3 27.6800 3.04156   8
  -3   2  -3 26.3809 2.72255  10
   3  -2   3 26.2579 2.96151   8
  -3   2   3 30.2684 2.93518  11
   0  -4   0 2889.17 275.839   5
   0   0   4 2966.40 275.768   2
   0   0  -4 3093.80 275.868  27
  -4   0   0 3477.78 276.206  27
  -4   0   0 3379.40 275.964  14
   0   0   4 3002.81 276.147  13
   0   4   0 2963.40 276.258   6
   4   0   0 3417.81 275.816  26
   0   0  -4 3094.89 276.059  25
   0  -4   0 3232.44 276.327  21
  -4   0   0 3682.45 276.349  23
   0  -4   0 3394.81 276.078  23
   0   0  -4 3317.90 275.878  19
   0   0   4 3348.70 275.943  20
   0   4   0 3119.46 276.129  18
   0  -4   0 3430.83 276.232  16
   0   0  -4 2937.65 275.893  15
   4   0   0 3120.17 275.683  15
   4   0   0 3235.14 275.867   7
   0   0   4 3283.05 276.094   8
  -4   0   0 3627.83 275.974  10
   0   4   0 3033.84 275.987   8
  -4  -1   1 22.6155 2.48296   5
  -1  -4   1 14.1046 2.12261   5
  -4   1  -1 12.9922 1.89181   6
  -4   1   1 16.0591 2.10433   6
  -1  -4  -1 17.4048 1.88321   5
   1  -4  -1 15.3066 1.55993   5
  -4   1   1 17.4010 2.06942   5
  -4  -1  -1 20.5289 2.27346   5
  -1   1   4 17.8712 2.12975   2
   1  -4  -1 15.8751 2.97239   3
   1   1  -4 17.7306 2.03182   1
  -1  -1  -4 19.4600 2.00363   3
   4   1  -1 16.8199 2.17318   1
   4   1   1 16.6557 1.94173   1
  -4   1  -1 12.3651 2.10962   2
  -4   1   1 16.9538 2.36121   2
   1  -1  -4 18.0603 1.82190  28
  -1  -1  -4 14.5860 2.04102  27
   1  -1  -4 15.2986 1.66032  27
   4   1  -1 19.9060 2.24735  29
  -1   1  -4 22.6341 2.50855  27
  -1  -4  -1 18.0265 2.03065  30
  -4   1   1 14.8603 2.31471  27
  -4  -1  -1 13.0884 2.38665  27
  -4   1  -1 14.1178 2.72858  27
   4  -1  -1 17.6860 2.27024  29
  -4  -1  -1 18.7259 2.24529  14
  -1  -1   4 17.3912 2.17972  13
  -4  -1   1 18.0826 2.14033  14
  -4  -1   1 20.6944 1.76059  12
  -1  -4  -1 17.1176 2.49657  12
  -4   1  -1 16.8429 2.05277  14
  -1   1   4 17.0785 2.73234  13
  -1   4  -1 16.1918 2.14932   7
  -1   4   1 19.0447 2.68117   7
   1   4   1 18.6711 2.74092   7
   1   1   4 15.7192 1.73395   6
  -1   1   4 18.2857 1.99691   6
  -1   4   1 21.3576 2.93468   6
   1   1   4 17.5387 2.44672   7
  -1  -1  -4 16.6779 2.72233  25
   1   4  -1 15.3267 1.93897  24
   4   1  -1 18.6161 2.26150  24
   1  -1  -4 15.5586 2.30856  25
   4   1  -1 19.1019 1.75070  26
  -1   1  -4 18.4314 2.58450  25
   1  -1   4 18.7770 1.64215  26
   4   1   1 21.7012 1.85831  26
   4  -1  -1 13.6275 1.94454  22
  -1  -1  -4 15.1814 2.41239  22
   1  -1  -4 19.8244 2.60572  22
   4  -1   1 12.1056 1.62438  22
  -4  -1  -1 23.3502 3.11587  23
  -1  -4   1 14.8027 2.31225  21
   1  -4   1 18.7535 2.33390  21
  -4   1   1 14.6408 2.23364  23
   1  -4  -1 11.2544 1.79559  23
  -1   1  -4 17.3198 2.04708  22
   4  -1  -1 16.4212 2.06426  24
  -1  -4  -1 14.4538 2.33363  23
   1  -1   4 17.9054 2.00543  20
   4   1   1 18.0264 1.55325  20
  -1  -4  -1 18.4553 2.89306  21
   4  -1   1 15.4899 1.85108  20
   1  -4  -1 14.0303 2.85402  21
  -1  -1  -4 15.5448 1.92837  19
   1  -4   1 18.2167 2.15841  20
  -1  -1   4 17.0077 2.00786  20
   1   1   4 16.9596 1.94958  20
  -1   1   4 17.3946 2.05787  20
  -1  -4   1 20.4303 2.02280  20
   1   1  -4 18.2220 1.83693  19
  -1   1  -4 18.0899 1.86876  19
   1  -1   4 18.9408 2.44516  17
  -1  -4   1 24.6555 2.47997  16
  -1  -1   4 12.5697 2.29247  17
  -4   1   1 16.6544 2.11100  18
  -1   4  -1 17.0245 2.14190  18
   4  -1   1 9.70851 1.92477  17
   4  -1  -1 13.4340 1.52754  16
   1   4  -1 18.2940 2.05827  18
  -4  -1  -1 17.0986 1.64726  19
   1  -4   1 16.5009 2.13421  16
   1   1  -4 20.9045 2.13790  15
   1  -1  -4 21.0620 2.18686  15
   4   1  -1 15.7398 1.72410  15
   4  -1  -1 16.8570 2.02575  15
  -1  -1  -4 18.8757 2.03454  15
   1  -1   4 16.9258 2.25534   8
  -1   4   1 17.2841 2.24989   8
   4   1  -1 18.2903 2.15239   7
   4   1   1 17.4085 2.09919   7
   1   4   1 17.7680 2.57719   8
   4  -1   1 12.8914 1.68295   7
  -1  -1   4 16.5515 2.15233   8
   1   1   4 14.5903 2.85841   8
  -1   1   4 19.3608 2.42169   8
  -1   4  -1 15.0984 1.75283   8
  -4   1   1 14.8128 1.97001  11
  -4  -1  -1 17.1022 2.04698  10
  -4  -1   1 16.5026 1.99000  10
   4   1   1 14.7160 2.54751   8
   4  -1   1 12.1017 2.21302   8
  -4   2   0 10.0967 1.51878   5
  -4   0   2 12.1861 1.94610   5
  -2  -4   0 13.7803 1.94896   5
   0  -4  -2 13.7379 1.38050   5
  -4  -2   0 8.61991 2.01009   5
  -4   0  -2 17.1893 1.99047   5
   0  -2   4 14.2445 1.67745   4
  -4   0   2 12.9180 1.88913   2
   4   2   0 7.04289 1.85728   1
   2  -4   0 23.4228 3.21100   3
  -2   0   4 14.9562 1.77619   2
   0  -2  -4 11.5042 1.98027   3
  -4   0  -2 11.8972 1.59954   2
   4  -2   0 8.73229 1.88986  28
  -2   0  -4 15.3221 2.27632  27
  -4   0  -2 14.4261 2.47190  27
   4   0  -2 14.0949 2.13742  29
   4   0   2 15.6043 1.72396  30
   4   2   0 9.26000 1.70913  29
  -4   0   2 16.2009 2.04350  13
  -4   2   0 8.61830 1.53057  14
  -2   0   4 16.6236 2.09745  13
   4   2   0 8.55549 1.37740  15
  -4  -2   0 6.79640 1.75994  14
   0  -4  -2 18.4735 2.29878  12
  -2   4   0 19.2320 1.78251  13
   0   4  -2 14.9177 2.25744  15
   0  -2   4 11.6021 1.73937  13
  -2   4   0 19.9527 2.93117   6
   0   2   4 10.1877 1.74294   6
   0   2   4 13.7887 2.34107   7
   0   4   2 12.3412 2.52793   7
   2   4   0 18.8088 2.41937   7
   2   0   4 14.0861 2.00554   7
   0   4   2 14.3644 2.57669   6
   4   0   2 14.5357 1.51427  26
  -2   0  -4 12.7652 2.58007  25
   0  -2   4 10.1844 1.18197  26
   0  -2  -4 12.5090 2.29871  25
  -4  -2   0 7.66509 2.60859  23
  -4   2   0 7.27798 1.76397  23
  -2   0  -4 13.3507 1.92061  22
   0  -4   2 11.9952 2.18147  21
  -2  -4   0 15.6829 2.42494  21
   4  -2   0 8.88104 1.56113  22
   0  -2  -4 11.5280 2.42683  22
   2   0  -4 15.7341 2.11260  22
  -2  -4   0 21.6373 2.71712  23
   4   0  -2 12.8471 1.94576  24
   2  -4   0 18.3833 2.57720  21
   0  -4  -2 17.4712 2.99678  21
   2   0   4 11.4108 1.59648  20
  -2   0   4 13.7529 1.81551  20
   0  -2   4 13.5921 1.73960  20
   2   0  -4 15.6782 1.57073  19
   4   0   2 15.7835 1.46615  20
  -2  -4   0 15.3109 1.61392  20
  -4   2   0 11.6257 1.76560  18
  -4   0  -2 15.5834 1.51283  19
  -2   4   0 14.6256 2.20682  18
   4  -2   0 7.34675 1.34703  16
   0  -4   2 22.1972 2.31605  16
  -4  -2   0 9.32076 1.16063  19
   2  -4   0 17.6675 2.06173  16
  -2   0   4 13.0357 1.82539  17
   0   2  -4 11.9211 1.56525  19
  -2   0  -4 16.3291 1.65458  19
   2   0  -4 15.7704 1.84315  15
   4   0  -2 14.7100 1.62248  15
  -2   0  -4 10.4635 1.54928  15
   0   2  -4 11.3425 1.84083  15
  -2   0   4 12.3905 1.88854   8
  -2   4   0 28.1201 2.56136   7
   2   0   4 14.0615 2.53970   8
   4   2   0 6.48883 1.86736   7
   0   2   4 10.7184 2.36734   8
   4   0   2 13.3422 2.37206   8
   0   4   2 13.7271 2.69753   8
   0   4  -2 9.68243 1.99067   7
   0  -2   4 12.1110 1.77411   8
   4   0   2 17.5507 1.98920   7
  -2  -4   0 14.9538 1.20927   9
  -4   0  -2 13.7400 1.67659   9
  -2   4   0 21.1307 1.39563   8
  -4   0  -2 17.0873 1.88114  10
  -4   2   0 9.27323 1.63455  11
  -4  -2   0 11.3414 1.70054  12
   0   4  -2 12.4496 1.28008   9
  -2  -4  -2 57.1659 4.67418   5
  -4   2  -2 51.1430 4.71602   5
  -2  -4   2 54.0288 4.90678   4
  -4  -2   2 36.7271 4.94729   5
  -4  -2  -2 58.8316 4.92133   5
  -2  -4   2 48.5127 4.99751   5
  -4   2   2 56.5735 4.56470   5
  -4  -2  -2 51.0015 4.57439   4
   2  -4  -2 42.6344 5.17091   3
   4   2  -2 55.7887 4.85165   1
  -2   2   4 80.3542 5.18583   2
  -4   2   2 64.6622 5.08470   2
   2   2  -4 58.3103 4.77940   1
   4  -2   2 55.8769 4.73754  28
  -4   2  -2 42.0477 5.21092  27
   2  -2  -4 45.9200 4.61101  28
  -2   4   2 60.0193 4.78418  27
   4  -2   2 53.1703 4.90623  30
   2   4   2 42.8362 4.16748  29
   2  -4  -2 41.8694 4.44236  29
  -4   2   2 47.5328 4.69803  27
   4  -2  -2 43.8758 4.75670  28
  -2   4  -2 62.1605 5.53104  27
  -2  -2  -4 44.6464 4.55903  27
   4  -2  -2 46.3956 4.77132  29
  -2  -4  -2 58.8298 4.43327  30
  -2   2  -4 41.9027 5.08427  27
  -4  -2   2 39.0749 4.57812  14
  -2  -2   4 44.6313 4.61317  13
  -2   4   2 51.3017 5.01696  13
  -2  -4  -2 58.9895 5.10458  12
  -2   2   4 57.3611 5.19989  13
  -2  -4   2 46.6663 4.48531  14
   4  -2  -2 49.4833 4.26938  12
   2   2   4 38.9430 4.44030   6
  -4   2   2 52.1545 4.89051   6
  -2   4  -2 46.3001 5.32442   6
  -2   4   2 54.5635 5.26389   6
  -2   2   4 63.8623 4.90369   6
  -2   2  -4 44.8723 4.59711   6
  -4   2  -2 39.8127 4.48307   6
   2   4  -2 48.0302 4.84941  24
  -2  -2  -4 43.6884 5.17305  25
   4  -2  -2 34.9989 4.53847  24
   2  -2  -4 42.7301 4.60410  25
   4   2  -2 52.4858 4.96267  24
  -2   4  -2 44.7756 4.59514  25
   2  -2   4 53.0982 4.32898  26
   4  -2  -2 42.4085 4.79136  22
  -2  -4  -2 53.4063 5.55173  21
   2  -2  -4 47.1695 5.09384  22
  -4  -2  -2 50.5325 4.82491  21
  -2  -4  -2 41.7434 5.19782  23
   2  -4   2 55.0163 4.66762  21
  -4  -2  -2 47.4575 5.52345  23
  -4  -2   2 40.2034 4.33938  20
   2  -2   4 55.0979 4.65021  20
   2   2   4 38.5708 4.40994  20
  -2  -4   2 44.7517 4.43930  20
   2  -4   2 64.1249 4.91694  20
   4  -2   2 53.6717 4.63279  20
   4   2   2 38.5968 4.18222  20
  -2  -2   4 42.4532 4.51281  20
  -4  -2  -2 50.0045 4.34881  19
   2  -4   2 49.6900 4.66288  16
   4  -2   2 50.8775 4.77549  17
   2   2  -4 56.1425 4.41305  19
  -2  -2   4 33.2392 4.39256  16
  -2   2  -4 40.8269 4.47750  19
   2  -2   4 43.8728 4.93388  17
   4   2  -2 51.4327 4.54482  15
   4  -2  -2 41.3529 4.67599  15
  -2   2  -4 46.8703 4.60400  15
  -2  -2  -4 52.5071 4.56113  15
   2   2  -4 60.7095 4.76639  15
   2  -2  -4 57.3229 4.90883  15
   2   4  -2 63.7574 4.88670  15
  -4  -2  -2 41.6297 4.23649  15
   2   2   4 44.7813 4.97110   7
   4   2  -2 62.0103 4.93750   7
   4   2   2 43.2549 4.89186   7
  -2   4   2 56.8763 5.16816   7
  -2   4  -2 40.3426 4.46076   7
   2   4   2 48.6846 5.29953   7
   2   4  -2 51.2607 4.85635   7
   2  -2   4 53.2267 4.68265   8
   4   2   2 39.3307 5.20999   8
  -2   2  -4 41.0763 4.46752   9
  -4  -2   2 38.1179 4.43491  10
   4  -2   2 45.9622 4.67822   8
  -2   4  -2 39.6276 4.39636  11
  -4  -2  -2 56.9483 4.58288   9
  -4   2   2 50.7876 4.64571  11
  -2   4   2 55.3959 4.68946   8
   2   2   4 45.1390 5.41163   8
  -4   2  -2 41.5636 4.51653   9
  -3  -1  -4 86.8597 8.10578   4
  -3  -4   1 98.6149 8.85375   5
  -4   3   1 94.7592 8.26528   5
  -1  -4  -3 119.172 8.46984   5
  -3  -4   1 98.9203 8.76713   4
  -4  -3  -1 86.3311 8.61968   4
  -3   1   4 100.826 8.94241   5
  -4  -3  -1 95.8569 8.72705   5
  -1  -3   4 87.9846 8.51359   4
  -4   3   1 103.216 9.02164   2
  -4  -1   3 121.699 8.67458   2
   3  -4  -1 98.3553 9.03336   3
   1  -3  -4 106.252 8.87525   3
  -3   1   4 114.568 8.74942   2
   4  -3   1 88.9421 8.71805   3
   4   3  -1 94.5856 8.71468   1
  -4   1  -3 90.3050 8.33173   2
   3  -1   4 99.9437 8.32397  28
   4  -3   1 100.930 8.73080  28
  -4   3   1 82.6790 8.67974  27
  -4   1  -3 93.9452 9.19680  27
  -1   3  -4 103.739 9.23091  27
  -3  -1  -4 81.8372 8.68224  27
  -3   1   4 114.882 8.90495  13
  -3   4  -1 76.1331 8.13027  14
  -3  -4   1 99.8048 8.53347  14
  -4   3   1 94.5500 8.58207  13
  -1  -3   4 103.013 8.41774  13
  -4  -3  -1 94.0949 8.65971  12
  -1  -4  -3 104.458 8.84749  12
  -4  -1   3 132.479 8.89262  13
   1   3   4 85.5432 8.61676   6
  -4   3   1 98.5660 8.86553   6
  -4   1  -3 79.9175 8.15302   6
  -3   4  -1 105.863 9.04568   6
  -3   1   4 99.8831 8.59503   6
  -1   4   3 89.5953 8.97889   6
   3  -4  -1 68.4969 8.13562  24
  -3   4  -1 82.9707 8.32291  25
   1  -3  -4 95.1764 8.76006  25
  -4   1  -3 77.0973 8.92616  25
   4   1   3 102.831 8.39127  26
   3   1  -4 99.3799 9.08448  24
   4  -1  -3 101.395 8.80106  24
   3  -1   4 95.5043 8.26924  26
   1   4  -3 69.4233 8.66608  24
  -3  -1  -4 74.0474 8.93777  25
   3   1  -4 90.4330 8.06923  26
   4  -3   1 81.4708 8.35676  21
  -4  -3  -1 68.0592 9.12038  23
  -3  -1  -4 100.643 8.93078  21
  -4  -3  -1 93.5036 8.76472  21
   4  -1  -3 108.226 8.74553  22
  -1  -4  -3 97.7934 9.48487  21
  -3  -4   1 101.923 9.24588  23
   1  -3  -4 98.7099 9.09622  22
   4   1   3 92.1073 8.21397  20
   1  -4   3 104.805 8.63148  20
  -4  -3  -1 91.3645 8.18044  19
   4  -3   1 95.0729 8.64417  20
  -3  -4   1 87.7375 8.22915  20
   3   1  -4 102.131 8.27048  19
   3  -1   4 92.8196 8.41610  20
   4  -3   1 71.9699 8.29869  16
  -4   1  -3 100.206 8.44241  19
   3  -1   4 88.8923 8.81632  17
  -3   4  -1 95.9784 8.74560  18
  -1   3  -4 97.4229 8.44319  19
  -1  -3   4 77.0808 8.41378  16
  -4   3   1 91.3935 8.78199  18
  -4  -1   3 135.617 8.42239  16
   1  -4   3 79.7133 8.48228  16
   3  -4  -1 98.7551 8.59190  16
   1   4  -3 102.166 8.70837  15
   3   1  -4 109.233 8.58341  15
   4  -1  -3 137.492 8.77134  15
   1  -3  -4 116.684 8.94172  15
  -4   1  -3 97.4743 8.30987  15
   4   3  -1 91.7909 8.41236  15
  -1  -4  -3 79.7928 8.68410  15
  -3  -1  -4 78.5363 8.21813  15
   1   3   4 102.186 9.05479   7
   1   4  -3 84.9200 8.55129   7
  -3   4  -1 98.7055 8.41321   7
   4   1   3 85.1541 8.62349   7
   4   3  -1 87.8414 8.67916   7
   3   4   1 103.104 9.06195   7
   3  -1   4 101.796 8.87191   8
  -1   3  -4 104.322 8.37405   9
  -4   1  -3 105.159 8.54520  10
  -4   3   1 83.2951 8.50370  11
   4   1   3 90.2611 9.14845   8
   3   4   1 83.2521 9.03082   8
  -4   1  -3 105.606 8.55921   9
  -3   4  -1 85.4643 8.43641  11
  -4  -3  -1 92.7592 8.31956   9
   1   3   4 96.6738 9.34637   8
   4  -3   1 77.7471 8.23584   8
  -3   1   4 93.8504 8.44165  11
  -1   4   3 99.3061 8.98336   8
  -4  -3   1 88.3740 8.81980   4
  -1  -4   3 104.091 8.90523   4
  -4  -3   1 90.7802 9.02671   5
   1  -3   4 90.5288 8.60473   4
  -3  -4  -1 91.8092 8.77644   5
  -4  -1  -3 100.652 8.89402   5
  -3  -4  -1 83.0484 8.89662   4
  -4   1   3 102.513 8.86538   5
  -3  -1   4 103.872 8.74954   2
   4   1  -3 121.601 8.95283   1
  -4   1   3 114.681 8.99056   2
   3  -4   1 98.0513 9.19416   3
   4   3   1 95.7842 8.61061  29
   4  -3  -1 107.157 9.00312  28
   4  -3  -1 117.765 8.89064  29
   3  -1  -4 121.012 8.76758  28
  -3   4   1 103.651 9.08414  27
  -4  -1  -3 68.9986 8.87891  27
   3  -4   1 89.3774 8.99374  30
  -3   1  -4 98.4140 9.29325  27
   1  -4  -3 120.906 9.07403  12
  -1  -4   3 95.4398 8.44714  14
  -3   4   1 89.3414 8.73085  13
  -1   3   4 84.5614 9.33505  13
   1  -3   4 79.9069 8.42567  13
  -4  -3   1 85.1353 8.84201  12
  -4  -3   1 103.143 8.81144  14
  -3  -1   4 118.220 8.95021  13
  -4   3  -1 84.5461 8.48161  14
  -4   1   3 108.037 8.99938  13
   1   4   3 100.828 9.24841   6
  -4   3  -1 102.929 8.91137   6
  -4   1   3 103.070 8.83600   6
  -1   3   4 93.7408 8.87798   6
  -3   4   1 102.410 9.23267   6
   1  -4  -3 61.8199 8.53656  25
   4   1  -3 121.389 9.24449  24
  -1  -3  -4 77.1332 8.94139  25
   4   1  -3 105.795 8.38649  26
   3   4  -1 109.003 8.95515  24
   4  -3  -1 85.3426 8.52050  24
  -4  -3   1 103.887 9.54008  23
   4  -3  -1 86.2040 8.79029  22
   3  -4   1 82.4291 8.75359  21
  -3  -4  -1 74.8084 9.17467  23
   3  -1  -4 115.736 9.13383  22
  -4  -1  -3 91.7263 8.72828  21
  -3   1  -4 89.9659 8.48338  22
  -1  -4   3 103.346 8.68184  20
  -4  -3   1 93.1954 8.34713  20
   4   1  -3 101.881 8.35968  19
   3  -4   1 103.000 8.91631  20
   4  -1   3 96.7752 8.59698  20
  -3  -1   4 105.539 8.75533  20
   3   1   4 90.3409 8.49786  20
   1  -3   4 96.1895 8.73409  20
   3  -4   1 85.0143 8.66152  16
  -3   1  -4 96.6171 8.64153  19
  -1   4  -3 95.1049 8.66133  19
   1   3  -4 98.3572 8.54478  19
  -4  -1  -3 98.9197 8.53990  19
  -3  -1   4 82.8274 8.45664  16
   4  -3  -1 98.0496 8.56540  16
   4  -1   3 77.5821 8.84176  17
   3  -1  -4 135.454 9.06826  15
  -3   1  -4 99.8810 8.58340  15
  -4  -1  -3 86.3430 8.29373  15
   1  -4  -3 87.4320 8.99521  15
   1   3  -4 93.0329 8.76455  15
   3   4  -1 96.7994 8.76636  15
   4   1  -3 114.631 8.69119  15
  -1  -3  -4 89.6239 8.80839  15
  -1   4  -3 107.346 8.96738  15
   1   4   3 96.6173 9.30877   7
  -1   3   4 110.251 9.27955   7
   3   4  -1 100.976 9.01031   7
  -3   4   1 99.9590 8.84142   7
   3   1   4 92.1562 8.80992   7
   4  -1   3 89.0873 8.43024   7
  -1   4  -3 92.2667 8.61655   7
   4   3   1 88.7964 9.04873   7
   4   3   1 78.5098 9.17109   8
   4  -1   3 76.7024 8.93246   8
  -3   1  -4 107.220 8.74939   9
   3   1   4 88.5194 9.27596   8
  -4   1   3 95.3651 8.64389  11
  -3  -4  -1 93.5745 8.42038   9
  -1   3   4 103.596 9.13855   8
  -3   4   1 87.7376 8.40885   8
  -1   4  -3 85.7095 8.36707  11
  -3  -1   4 104.755 8.49641  11
  -1   4  -3 99.9754 8.47044   9
   1  -3   4 89.7141 8.55997   8
  -3   3   4 258.591 24.3603   5
  -3  -4  -3 279.648 24.5183   5
  -3  -4   3 293.907 25.0344   5
  -4  -3   3 306.756 25.1432   5
  -3   4   3 278.086 24.0365   5
  -3  -3   4 311.014 25.1908   5
  -3  -4   3 263.065 24.6454   4
  -4  -3   3 268.818 24.6375   4
  -4  -3  -3 272.985 24.6263   5
  -4   3   3 299.721 24.2844   5
  -3  -3   4 254.319 24.5540   4
  -4  -3  -3 279.983 24.5360   4
  -3  -3  -4 334.053 24.7344   5
  -3   3   4 344.166 24.9876   2
   4  -3   3 241.687 24.4821   3
   3  -4  -3 311.028 25.0686   3
   4   3  -3 255.301 24.6390   1
  -4   3   3 377.364 25.1245   2
   4  -3   3 258.110 24.5152  28
   4  -3  -3 296.278 24.6861  29
   3  -4  -3 258.513 24.4797  29
  -3   4   3 254.829 24.3499  27
   4  -3  -3 291.875 24.6842  28
  -3   3  -4 270.658 24.9998  27
   3  -3  -4 303.797 24.6622  28
  -4   3   3 232.976 24.3686  27
  -4   3  -3 304.547 25.2329  27
  -3   4  -3 287.668 25.1646  27
  -4   3   3 298.650 24.8107  13
  -3   4   3 243.775 24.7413  13
  -3  -4   3 276.751 24.4021  14
   3  -4  -3 362.650 24.6845  12
  -4  -3   3 294.222 24.5099  14
  -4   3   3 312.600 24.9141   6
  -4   3  -3 260.889 24.4200   6
  -3   4   3 279.091 24.9092   6
  -3   3   4 321.151 24.8833   6
   3   3   4 272.947 24.5570   6
  -3   3  -4 281.361 24.4714   6
  -3   4  -3 290.771 24.8486   6
  -4   3  -3 258.802 24.7681  25
  -3   4  -3 277.617 24.6919  25
  -3   3  -4 270.400 24.8661  25
   3  -3  -4 282.615 24.3948  25
   3   4  -3 255.744 24.8168  24
   4  -3  -3 231.723 24.4154  24
  -3  -3  -4 298.830 25.3184  21
   4  -3  -3 316.959 24.9377  22
  -4  -3  -3 292.162 25.0230  21
  -3  -4  -3 279.894 25.2823  21
   3  -3  -4 344.246 25.1188  22
  -3  -3   4 285.851 24.4200  20
  -4  -3   3 286.213 24.3394  20
  -3  -4   3 283.202 24.3548  20
   4  -3   3 294.943 24.5625  20
   3  -3   4 287.373 24.5578  20
  -4  -3  -3 267.715 24.3349  19
  -3  -3  -4 265.835 24.4394  19
   3  -4   3 286.326 24.6125  20
   3  -4   3 207.147 24.3868  16
  -3   3  -4 286.940 24.5132  19
   3  -3   4 274.227 24.8386  17
  -4  -3   3 341.204 24.7452  16
  -3  -4   3 306.510 24.7146  16
  -3  -3   4 271.081 24.4541  16
   4  -3   3 283.276 24.7555  17
   3   3  -4 271.017 24.1947  19
  -3  -4  -3 217.691 24.4381  15
   3   4  -3 281.500 24.5780  15
   3  -4  -3 292.089 24.8942  15
   4   3  -3 293.413 24.4983  15
  -3   3  -4 287.788 24.5683  15
  -3  -3  -4 248.724 24.3876  15
   4  -3  -3 338.799 24.8768  15
   3   3  -4 290.519 24.5593  15
   3  -3  -4 385.559 25.0621  15
  -4  -3  -3 215.411 24.2436  15
   4   3  -3 273.029 24.6830   7
   4   3   3 292.670 24.9940   7
   3   4   3 275.180 25.0495   7
   3   3   4 275.193 24.9504   7
  -3   4   3 286.236 24.7845   7
   3   4  -3 260.578 24.6684   7
  -3   4  -3 256.865 24.1846   7
  -3   4  -3 271.783 24.3661   9
   3   3   4 304.304 25.4610   8
  -4   3   3 310.187 24.5837   8
  -3   3  -4 295.228 24.4589   9
  -4  -3   3 290.918 24.2888  10
  -4   3  -3 281.368 24.4617   9
  -4   3   3 261.487 24.5793  11
  -3   4   3 262.102 24.4445   8
   3   4   3 298.481 25.3266   8
  -3   3   4 295.514 24.6245   8
  -4  -3  -3 273.719 24.4186   9
   4   3   3 285.136 25.2905   8
  -3   3  -4 278.245 24.3225  10
   3  -3   4 251.557 24.3381   8
  -4   0   4 6950.15 497.562   5
   0  -4   4 6181.84 497.040   4
  -4  -4   0 5564.98 497.160   5
   0  -4  -4 6524.23 497.454   3
  -4   0  -4 5434.43 496.560   2
   4  -4   0 6101.81 497.316   3
  -4   0   4 6791.50 497.154   2
   4  -4   0 6177.95 497.248  28
  -4   0  -4 5362.92 497.268  27
  -4   4   0 6409.79 497.478  27
  -4   4   0 6135.59 496.901  13
  -4   0   4 7023.85 497.291  13
  -4  -4   0 5235.81 497.142  12
   0   4   4 5731.05 497.205   6
   4   0  -4 6579.63 497.400  24
   0  -4  -4 4553.42 496.960  25
   4   0   4 5977.79 496.803  26
  -4   0  -4 6591.62 496.986  21
   4   0  -4 7629.25 497.317  22
  -4  -4   0 4918.26 497.459  23
  -4   4   0 4919.75 496.549  23
   4   0   4 5987.98 496.799  20
  -4  -4   0 5518.84 496.550  20
   0  -4   4 4982.42 496.927  16
  -4   0   4 5253.41 496.584  16
   4  -4   0 5933.37 496.926  16
  -4   0  -4 6221.71 496.897  19
   0   4  -4 6419.20 496.914  19
   4   0  -4 7710.94 497.182  15
   0   4  -4 6277.24 497.164  15
  -4   0  -4 6056.57 496.698  15
   4   4   0 5841.51 497.274   7
   0   4  -4 5593.44 496.930   7
   0   4   4 6248.26 497.506   7
   4   0   4 5117.05 496.821   7
   4   4   0 5137.93 497.290   8
   0   4   4 6418.11 497.558   8
  -4   0   4 6390.89 496.881  11
  -4   0  -4 6261.46 496.999   9
   4   0   4 5309.98 497.273   8
  -4  -2  -4 89.2561 7.93267   5
  -2  -4  -4 100.654 7.79958   5
  -2  -4   4 86.4576 7.83759   4
  -2   4   4 60.8090 7.34918   5
  -2  -4   4 91.0872 8.26799   5
  -4   2   4 73.4076 7.65434   5
  -4  -4   2 84.1206 8.12729   5
  -4   4   2 82.3236 7.23839   5
  -4  -4  -2 74.6266 7.74761   5
  -4  -2  -4 69.5167 7.37041   4
  -4  -4  -2 72.9926 7.84068   4
  -4  -2   4 104.829 8.64038   5
  -4  -4   2 80.9965 7.86977   4
  -4   2   4 98.4626 8.04887   2
   4  -4   2 73.7135 7.88097   3
   4  -4  -2 98.6639 8.36151   3
   2  -4  -4 97.1892 8.34966   3
  -2   4  -4 99.7941 8.71730  27
  -4  -2  -4 62.5326 7.76831  27
  -4   4   2 68.4204 7.73112  27
   4   4   2 89.8530 7.44861  29
  -4   2  -4 85.2892 8.35750  27
  -2   4   4 58.1704 7.16568  27
   4  -2  -4 112.974 7.93753  28
   4  -2   4 77.4991 7.56155  28
   4  -4  -2 94.3110 7.78458  29
  -4   4  -2 108.960 8.80753  27
   4  -4  -2 100.965 8.09234  28
   4  -4   2 77.2918 7.91705  28
  -4   4   2 72.5735 7.74903  13
  -4  -2   4 112.440 8.10587  13
  -4   2   4 91.4143 8.03717  13
  -2  -4   4 84.2490 7.45442  14
  -4  -4   2 96.9623 7.73739  14
  -2   4   4 68.8345 8.18879  13
  -4   2   4 95.4634 7.93248   6
  -4   2  -4 82.7604 7.31072   6
  -4   4   2 79.4290 8.12890   6
  -2   4  -4 88.4556 8.28172   6
  -4   4  -2 96.3376 8.01924   6
  -2   4   4 75.7546 8.02923   6
   2   4   4 93.5478 8.14062   6
   4   4  -2 84.1933 7.98916  24
  -2   4  -4 89.1541 8.03290  25
   4  -2   4 82.8005 7.40876  26
   4  -2  -4 82.8980 7.87151  24
   4  -4  -2 68.8126 7.39748  24
   4   2  -4 94.4944 8.39324  24
   2  -4  -4 85.3577 7.74200  25
   2   4  -4 53.5124 7.89530  24
  -4   4  -2 68.4554 7.63891  25
  -4   2  -4 79.9136 8.24370  25
   4  -2  -4 110.086 8.28371  22
  -2  -4  -4 75.1733 8.64731  21
  -4  -4  -2 72.1457 8.09093  21
  -4  -4  -2 66.1740 8.29747  23
  -4  -2  -4 85.1631 8.16483  21
   4   2   4 82.7101 7.37342  20
  -4  -4   2 90.7835 7.38427  20
  -2  -4   4 88.6943 7.60050  20
  -4  -2   4 100.762 7.69727  20
   4  -4   2 77.2112 7.73306  20
   2  -4   4 77.0630 7.68529  20
   4  -2   4 76.4306 7.56731  20
  -2   4  -4 93.5423 7.69886  19
  -4  -2   4 106.516 7.62612  16
   2   4  -4 76.2546 7.39833  19
  -4  -2  -4 81.2140 7.52843  19
   4  -4   2 65.2471 7.51350  16
   2  -4   4 56.8545 7.54680  16
  -2  -4   4 91.1045 7.76965  16
   4  -2   4 66.4294 7.85153  17
  -4  -2  -4 69.3310 7.28494  15
   2   4  -4 86.3525 7.81242  15
   4   4  -2 76.8456 7.65253  15
   2  -4  -4 94.6545 8.14859  15
  -2  -4  -4 66.9103 7.69837  15
   4  -2  -4 133.606 8.23479  15
   4  -4  -2 78.2472 7.93489  15
  -4   2  -4 99.7578 7.65262  15
   4   2  -4 90.3832 7.70450  15
  -2   4  -4 92.3942 7.89462  15
   4   4  -2 74.4018 7.88689   7
   2   4   4 85.1307 8.42709   7
   4   4   2 97.7071 8.43737   7
   4   2   4 84.6380 8.02124   7
  -2   4  -4 81.5423 7.44237   7
  -4  -2  -4 84.6928 7.65764   9
  -4   2  -4 99.3668 7.73748   9
  -4   2  -4 99.3930 7.67641  10
  -2   4   4 80.0029 7.91821   8
  -4  -4  -2 78.3528 7.44623   9
   4  -2   4 68.6349 7.73988   8
  -2   4  -4 91.6884 7.51711   9
  -4   2   4 93.4384 7.87662   8
   4   2   4 97.2078 8.74197   8
  -4   2   4 77.1863 7.64231  11
   4   4   2 78.3321 8.34977   8
   2   4   4 89.0633 8.65681   8
  -4   4   2 70.7944 7.72054  11
  -4  -2   4 96.9544 7.44746  10
  -4   4  -2 89.9825 7.62155  11
  -4  -4   4 1105.01 108.858   4
  -4  -4  -4 1284.73 108.950   4
  -4  -4   4 1335.51 109.459   5
  -4  -4  -4 1401.15 108.991   5
  -4   4   4 1418.47 108.429   5
  -4   4   4 1531.11 109.451   2
  -4   4  -4 1323.62 109.581  27
  -4   4   4 1073.13 108.479  27
   4  -4  -4 1322.68 108.999  28
  -4   4   4 1407.83 109.315  13
  -4  -4   4 1193.18 108.683  14
  -4   4  -4 1242.17 108.791   6
  -4   4   4 1446.89 109.279   6
  -4   4  -4 1183.79 109.148  25
   4   4  -4 1200.67 109.284  24
   4  -4  -4 1304.24 109.256  22
  -4  -4  -4 1351.34 109.667  21
  -4  -4  -4 1216.48 108.697  19
  -4  -4   4 1223.12 108.612  20
   4  -4   4 1354.93 108.906  20
  -4  -4   4 1419.50 108.959  16
  -4   4  -4 1264.50 108.812  19
  -4  -4  -4 1116.76 108.626  15
   4  -4  -4 1350.24 109.215  15
   4   4  -4 1353.34 108.871  15
   4   4   4 1154.42 109.227   7
  -4   4  -4 1138.57 108.269   7
   4   4  -4 1253.23 109.012   7
   4   4   4 1220.66 109.627   8
  -4  -4  -4 1303.16 108.749   9
  -4   4  -4 1252.43 108.618  10
  -4   4   4 1407.94 108.890   8
  -4   4  -4 1222.32 108.685   9
   0  -5  -1 18.1593 1.87703   5
   1  -5   0 17.2130 1.91356   5
  -1  -5   0 14.1531 2.08888   5
  -5  -1   0 15.7396 2.36446   5
  -5   0   1 21.3398 2.51861   5
  -5   1   0 14.7007 2.08356   6
   0  -5   1 13.1231 2.11010   5
  -5   1   0 17.4175 2.19925   5
  -5   1   0 18.7090 2.37119   2
   0  -1   5 13.0747 1.81316   2
  -1   0   5 16.4247 2.07162   2
   0   1  -5 16.1132 2.00000   1
  -1   0  -5 15.8850 1.72496   1
   1   0   5 17.7928 1.80650   2
   5   1   0 21.0319 2.28725   1
  -5   0  -1 14.9204 2.11463   2
   0   1   5 17.1392 2.05850   2
   5   0  -1 25.9436 2.55742  29
   1   0  -5 18.2753 1.75004  28
   1  -5   0 19.2917 2.58506  30
  -1   0  -5 17.7864 2.38546  27
   0  -1  -5 16.5180 1.98455  27
   0  -5  -1 18.7695 2.47713  30
  -5   0  -1 16.6523 2.76489  27
   0  -1   5 16.3571 2.44640  13
  -5   0   1 19.3887 2.32829  14
  -5  -1   0 16.1822 2.28008  14
  -1   0   5 16.8681 2.61162  13
  -5   1   0 15.1767 2.10975  14
  -1   5   0 18.7893 3.40036   6
   0   1   5 17.4638 1.91544   6
   0   5  -1 15.8263 2.62232   7
   0   5   1 21.1703 3.18203   6
  -1   5   0 17.0700 2.73724   7
  -1   0  -5 16.0857 2.77443  25
   5   0  -1 22.1473 2.45782  24
   5   0   1 20.3768 1.96373  26
   0   1  -5 18.1311 2.72489  25
   0   1  -5 13.5898 2.42190  27
   5   1   0 16.9876 1.90806  26
   5   0  -1 23.5992 2.01069  26
   0  -1  -5 20.7470 2.75827  25
   0   5  -1 13.6696 1.95244  24
  -5   0  -1 21.1283 3.16399  23
   0   1  -5 16.4868 2.34325  22
   0  -5   1 12.6571 2.56173  21
  -1   0  -5 19.6464 2.44906  22
   0  -5  -1 11.5560 2.21686  23
  -1  -5   0 22.0101 2.98351  21
   0  -1  -5 21.1871 2.85776  22
  -5   1   0 14.4986 2.39538  23
  -1  -5   0 15.2029 2.57003  23
  -5   0   1 19.9545 2.69320  23
   5  -1   0 16.3201 1.93052  22
   1  -5   0 18.1074 2.93606  21
   0   1   5 20.2955 2.18462  20
   0  -1  -5 21.1939 2.16566  19
   0  -5  -1 9.80422 2.90764  21
   1   0   5 17.7312 2.08995  20
   0  -1   5 19.2324 2.13319  20
  -1  -5   0 14.9404 2.16254  20
   0  -5   1 21.2192 2.34477  20
  -1   0   5 18.9202 2.20155  20
   5   0   1 19.5907 1.84488  20
   1   0  -5 19.6898 2.07439  19
  -1   0  -5 18.7443 2.06833  19
   0   5  -1 18.9827 2.36687  18
  -1   5   0 17.3637 2.51629  18
   0   1  -5 19.4231 2.02076  19
   5  -1   0 14.5471 1.86792  17
  -5   0  -1 17.4544 1.85147  19
  -5   1   0 18.9058 2.11609  18
   5   0  -1 20.4367 1.94012  15
  -1   0  -5 17.2482 2.10486  15
  -1  -5   0 18.4951 2.68272  16
   1  -5   0 15.1998 2.41739  16
   5   1   0 18.0414 1.70980  15
   0  -5   1 19.5158 2.46476  16
   5  -1   0 17.6338 1.95302  15
   1   0  -5 17.3718 2.20618  15
  -1   0   5 18.7780 2.45608   8
   5   1   0 17.0138 2.27951   7
  -1   5   0 17.1076 2.23511   8
   1   0   5 15.4009 2.62790   8
   5   0   1 13.8540 1.96860   7
   0  -1   5 17.6984 2.39460   8
   0   5   1 16.8534 2.64892   8
   1   5   0 14.4508 2.40052   8
   0   1   5 19.5625 2.78306   8
   0   5  -1 12.2318 2.06733   8
   5   0   1 16.7684 2.61056   8
  -5   0  -1 20.2650 2.30065  10
  -5  -1   0 19.2300 2.24092  10
  -5  -2  -1 509.811 43.2590   5
  -2  -5   1 472.619 43.1957   5
  -5   2   1 499.619 42.9527   5
  -1  -5  -2 486.655 42.8606   5
   5   1   2 438.992 42.8487   1
  -2   1   5 584.167 43.1831   2
   2   1  -5 505.490 43.0301   1
   5   2  -1 501.761 43.1152   1
  -5  -1   2 470.738 43.0499   2
  -5   1  -2 463.878 42.9766   2
   2  -5  -1 510.060 43.6232   3
  -5   2   1 416.686 43.1584  27
   5   2  -1 561.974 43.2261  29
  -5   1  -2 447.638 43.4443  27
   5  -1  -2 578.090 43.3671  29
   5  -2   1 507.724 43.1496  28
   5   1   2 501.844 42.8422  30
  -1   2  -5 506.553 43.3784  27
  -2  -1  -5 439.320 43.0605  27
  -2   5  -1 452.777 42.6805  13
  -2   1   5 548.125 43.4146  13
  -1  -2   5 505.706 43.0651  13
  -5  -1   2 564.863 42.7218  12
  -1  -5  -2 485.800 43.4521  12
  -5  -1   2 545.019 43.1651  14
  -1   5   2 503.386 43.6325   6
   1   2   5 439.886 42.8276   6
  -2   1   5 485.755 42.9702   6
  -5   1  -2 399.244 42.7725   6
   1  -2  -5 544.255 43.2862  25
   1   5  -2 379.287 43.0036  24
   5   1   2 508.087 42.9089  26
   5   2  -1 571.305 43.4048  24
   5  -1  -2 472.899 43.1177  24
   5   2  -1 521.917 42.8550  26
   2  -1   5 497.036 42.7650  26
  -2  -1  -5 477.155 43.5294  25
  -1   2  -5 448.120 43.2742  25
   1  -2  -5 572.297 43.6110  22
   5  -1  -2 495.347 43.0498  22
  -5  -2  -1 439.044 43.6049  23
   1  -5   2 472.674 43.1858  21
  -1  -5  -2 361.151 43.1800  23
  -1  -5  -2 449.625 43.8113  21
  -5   2   1 539.944 43.0955  23
   2  -5  -1 438.877 43.4569  21
  -2  -5   1 527.995 43.5089  21
  -2  -1  -5 430.758 43.1464  22
   5  -2   1 506.820 43.0511  20
   1   2   5 486.927 42.9798  20
  -2  -5   1 542.041 42.9889  20
  -1  -2   5 491.109 43.0319  20
   2  -1   5 499.601 43.0031  20
   1  -5   2 549.565 43.2381  20
  -5   2   1 504.676 43.1998  18
   1  -5   2 493.939 43.1862  16
  -5   1  -2 521.248 42.9310  19
   2   1  -5 507.446 42.8753  19
  -2   5  -1 485.277 43.2670  18
   1   5  -2 462.175 43.0445  18
   2  -5  -1 490.843 43.2765  16
  -1  -2   5 545.370 43.3469  17
   5  -2   1 472.756 43.0023  17
  -5  -2  -1 487.591 42.6840  19
   2  -1   5 434.760 43.2864  17
  -2  -1  -5 514.115 43.0116  19
  -1   2  -5 511.451 42.9786  19
   2   1  -5 541.035 43.1311  15
   1   5  -2 538.696 43.3275  15
  -1   2  -5 501.637 43.0587  15
  -2  -1  -5 474.373 42.9024  15
   5   2  -1 508.297 42.8179  15
   1  -2  -5 604.422 43.3133  15
   5  -1  -2 553.605 43.0318  15
   1   2   5 494.519 43.3635   7
   5   1   2 490.175 43.1439   7
  -1   5   2 530.681 43.5719   7
  -2   5  -1 518.724 43.1722   7
   5   2  -1 478.392 43.1538   7
   2   5   1 549.408 43.6369   7
   1   5  -2 470.730 43.2042   7
   2   5   1 480.656 43.4923   8
   1   2   5 543.841 43.7022   8
  -2   1   5 566.023 43.2634   8
   2  -1   5 474.960 43.2154   8
   5  -2   1 398.380 42.9952   8
  -5   2   1 478.116 43.0371  11
  -1   5   2 499.290 43.2735   8
   5   1   2 459.269 43.4642   8
  -1  -2   5 518.813 43.1086   8
  -5   1  -2 488.032 43.0255   9
  -5  -1   2 537.476 42.9938  10
  -5   1   2 529.042 42.7354   5
  -2  -5  -1 447.958 42.5988   5
  -5  -1  -2 497.942 42.7838   5
   1  -2   5 423.554 42.3403   4
  -5   2  -1 570.324 42.7026   5
  -1  -5   2 500.211 42.8558   5
  -5  -2   1 493.639 42.9707   5
  -5   2  -1 509.295 42.8291   2
   5   2   1 476.006 42.6093   1
   1   2  -5 516.189 42.6478   1
   5   1  -2 562.212 42.8467   1
  -2  -1   5 433.483 42.5143   2
  -1   2   5 569.216 42.8051   2
  -5   1   2 508.724 42.8402   2
  -1  -2  -5 523.951 42.6760   3
   1  -5  -2 538.667 43.3371   3
   5  -2  -1 545.149 42.8439  28
  -5   2  -1 461.930 43.0840  27
  -1  -2  -5 383.892 42.3769  27
   5  -1   2 518.615 42.7483  30
   5  -2  -1 585.807 42.9242  29
  -2   1  -5 473.182 42.9085  27
  -2   5   1 543.948 43.0125  27
   5   2   1 511.796 42.6800  29
   5   1  -2 591.200 43.0258  29
  -5  -1  -2 390.376 42.8427  27
  -5   1   2 428.854 42.7265  27
   2  -1  -5 539.966 42.5107  28
   1  -2   5 419.587 42.6148  13
  -5  -2   1 517.341 42.5373  12
  -5   2  -1 444.520 42.5475  14
  -2  -1   5 534.877 42.8583  13
  -5  -2   1 519.291 42.7685  14
   1  -5  -2 499.496 42.9848  12
  -2   5   1 424.259 42.6874  13
  -2  -5  -1 459.356 43.0586  12
  -1   2   5 516.503 43.2284  13
  -5   2  -1 469.494 42.6147   6
  -5   1   2 447.022 42.6652   6
   1   5   2 453.645 43.1007   6
  -1   5  -2 482.506 43.2277   6
  -2   5   1 514.919 43.2872   6
  -1   2   5 508.720 42.6533   6
  -2   1  -5 451.769 42.9999  25
   5  -2  -1 501.993 42.6426  24
   1  -2   5 479.942 42.2850  26
   2   5  -1 523.532 42.7224  24
  -1  -2  -5 473.973 43.0675  25
   5   1  -2 503.403 42.4036  26
   5   1  -2 501.979 42.9051  24
   5  -1   2 496.702 42.4924  26
   1  -5  -2 363.486 42.4763  23
  -2  -5  -1 371.839 42.9148  23
  -1  -2  -5 475.031 42.9901  22
  -5  -2   1 511.109 43.2831  23
  -5   2  -1 516.129 42.9468  23
   5  -2  -1 473.714 42.6028  22
   2  -5   1 455.718 42.8694  21
  -2   1  -5 464.825 42.5635  22
  -1  -5   2 485.061 42.9396  21
   2  -1  -5 599.515 43.0972  22
  -2  -5  -1 518.959 43.3814  21
   1  -5  -2 475.904 43.2762  21
  -1  -5   2 553.929 42.7070  20
   2   1   5 464.422 42.5361  20
   1  -2   5 512.631 42.6715  20
   5  -1   2 513.662 42.5233  20
  -1  -2  -5 522.399 42.6943  19
   2  -5   1 503.504 42.8710  20
   1  -2   5 490.249 42.9878  17
  -2   1  -5 525.692 42.6241  19
   5  -1   2 389.990 42.6034  17
  -2  -1   5 536.881 42.8335  17
   2  -5   1 509.992 42.8293  16
  -1  -5   2 530.131 42.9222  16
   1   2  -5 496.403 42.5004  19
  -5  -1  -2 504.038 42.4215  19
   2   5  -1 498.219 42.7504  18
  -1  -2  -5 498.392 42.6826  15
   1   2  -5 483.796 42.6819  15
   2  -1  -5 634.679 42.9463  15
  -2   1  -5 482.452 42.5749  15
   5   1  -2 486.718 42.4679  15
   5  -2  -1 512.717 42.6693  15
   1   5   2 506.643 43.2831   7
  -2   5   1 544.237 43.0425   7
   2   1   5 498.337 42.8081   7
   2   5  -1 473.349 42.9361   7
   5   2   1 501.180 42.8423   7
  -1   5  -2 488.810 42.7047   7
  -1   2   5 558.432 43.0643   8
  -2   5   1 486.167 42.5096   8
  -5   1   2 490.879 42.6366  11
  -2  -1   5 457.203 42.3425  11
  -2  -1   5 544.974 42.8290   8
  -5  -2   1 531.765 42.6331  10
   2   1   5 502.521 43.1810   8
   5  -1   2 437.712 42.8289   8
   1   5   2 485.469 43.2059   8
   1  -2   5 495.171 42.7030   8
   5   2   1 446.168 43.0449   8
  -2  -5  -3 76.9339 7.33045   5
  -5  -3  -2 75.4294 7.66793   5
  -3  -5   2 81.8199 7.78183   4
  -5   3   2 77.2100 7.20666   5
  -5  -2   3 88.4713 8.15672   5
  -5  -3  -2 75.7867 7.46243   4
  -2  -3   5 71.9432 7.42689   4
  -3  -5   2 79.3223 7.83220   5
  -3   2   5 81.1400 7.95290   5
   3  -5  -2 84.0498 8.19892   3
   5  -3   2 77.9175 7.57766   3
   5   3  -2 73.5136 7.62861   1
  -5   3   2 92.8235 7.99987   2
  -3   2   5 116.547 8.07433   2
   3   2  -5 84.8485 7.62984   1
   5  -2  -3 100.868 7.97195  29
  -5   2  -3 76.2145 8.18074  27
  -2   3  -5 68.7808 8.00743  27
   5  -3   2 82.4150 7.65263  28
  -5   3   2 63.4637 7.49915  27
   5  -3   2 81.4283 7.78200  30
  -2   5   3 81.7911 7.41889  27
   3  -5  -2 77.2258 7.30701  29
  -3  -2  -5 60.4011 7.42519  27
  -3   2   5 93.4351 8.06729  13
  -2  -5  -3 79.6086 7.89890  12
  -5   3   2 85.4813 7.70042  13
  -3  -5   2 81.4645 7.38641  14
  -2  -3   5 89.2170 7.48806  13
  -2   5   3 70.1278 7.94704  13
  -5  -2   3 83.8037 7.51907  14
  -5   3   2 88.2840 7.89871   6
  -2   5   3 86.1230 8.23650   6
  -3   2   5 79.5146 7.62052   6
  -2   3  -5 80.6270 7.71637   6
  -5   2  -3 70.3703 7.16773   6
  -3   5  -2 87.9247 8.20105   6
   5   3  -2 73.1485 7.76310  24
   2  -3  -5 80.7220 7.63564  25
  -3   5  -2 74.5140 7.40811  25
   3   2  -5 63.2705 7.91002  24
  -3  -2  -5 60.3520 7.89074  25
   2   5  -3 60.0371 7.63461  24
   3  -2   5 75.1816 7.10698  26
  -2   3  -5 70.1162 7.87470  25
   5  -2  -3 73.5631 7.53496  24
  -5  -3  -2 58.8654 8.17243  23
   2  -3  -5 90.5594 8.21778  22
   5  -2  -3 83.5807 7.72037  22
  -5  -3  -2 75.1434 7.63384  21
  -3  -2  -5 82.4768 8.19797  21
  -2  -5  -3 66.2917 8.02789  23
   3  -2   5 83.4544 7.43783  20
   2  -5   3 84.4568 7.59959  20
  -2  -3   5 87.5434 7.44854  20
   5  -3   2 83.0371 7.50749  20
  -3  -5   2 80.2901 7.21519  20
  -3  -2  -5 80.5738 7.40128  19
   3  -2   5 62.5329 7.74302  17
   3   2  -5 81.9334 7.15809  19
  -5   2  -3 85.8388 7.40348  19
  -2   3  -5 89.4097 7.44893  19
  -3  -5   2 87.8888 7.94291  16
  -5  -3  -2 75.5411 7.10175  19
   2  -5   3 68.0364 7.43868  16
  -2  -3   5 67.1670 7.31493  16
   2   5  -3 76.3467 7.59538  15
   5   3  -2 72.5786 7.31508  15
   5  -2  -3 103.156 7.74763  15
  -3  -2  -5 72.3964 7.23266  15
   2  -3  -5 107.374 8.00268  15
  -2   3  -5 80.8824 7.57349  15
   3   2  -5 88.8828 7.59706  15
   2   3   5 75.5340 7.93252   7
  -2   5   3 87.3180 8.07860   7
  -3   5  -2 79.5124 7.38875   7
   3   5   2 96.8177 8.33840   7
   5   2   3 84.6732 7.86145   7
   5   3  -2 75.2070 7.71306   7
   5   2   3 73.8248 8.22210   8
   3  -2   5 72.8192 7.56352   8
   2   3   5 82.4678 8.44280   8
  -5  -3  -2 79.1392 7.31846   9
  -5  -2   3 86.0067 7.31970  10
  -2   3  -5 82.9218 7.35320   9
  -3   5  -2 72.0841 7.30578  11
  -5   3   2 69.2765 7.42455  11
  -5   2  -3 77.7566 7.42908   9
  -3   2   5 90.9773 7.80669   8
  -5   2  -3 85.9096 7.45024  10
  -2   5   3 85.1023 7.67444   8
  -5  -3   0-1.10452 1.45579   4
  -5  -3   0 0.59509 1.63527   5
  -5   0  -3-0.16805 1.56293   5
  -5   3   0-0.39436 0.96308   5
  -3   0   5-0.25669 2.17924   5
  -5   0   3-1.67763 1.56741   5
  -3  -5   0 0.32942 1.38499   5
  -3  -5   0-0.20982 1.72097   4
   3  -5   0-0.72066 2.27801   3
   0  -3   5 0.81966 0.93382   4
  -5   0  -3 0.31581 0.95920   2
  -5   3   0 1.16514 1.79162   2
  -3   0   5 0.26291 1.32055   2
   0  -3  -5 1.81009 1.93292   3
  -5   0   3-0.14831 1.39563   2
  -5   3   0-1.99799 1.97246  27
   5   3   0-1.03208 1.13123  29
  -5   0  -3-1.64082 2.01829  27
   5  -3   0-1.37897 1.61577  28
  -3   0  -5 0.38970 1.96397  27
   0  -3   5-0.39296 0.98014  13
  -5   3   0 0.32434 0.97717  14
  -5   0   3 1.40811 1.44368  13
  -3   5   0-0.18861 0.96968  13
   0   5  -3 0.37281 1.48940  15
  -3   0   5-1.26222 1.64339  13
  -5  -3   0-0.31921 1.39323  14
   0   3   5-1.09459 2.30859   7
   0   5   3 0.24647 2.14171   6
   0   3   5 0.13371 1.30617   6
   0   5   3 2.06932 2.39607   7
  -5   3   0 0.33887 1.49890   6
   5   0   3 1.32399 1.34663   7
   3   0   5 0.63306 1.37178   7
  -3   5   0 5.31216 1.83387   7
   3   5   0 0.66355 1.78617   7
  -3   5   0-1.59998 2.34244  27
   5   0  -3 0.19113 1.60714  24
   5   0   3 0.55657 0.80612  26
  -3   0  -5-1.56000 2.46556  25
   0  -3  -5 1.80913 2.11323  25
   0  -3   5 0.05452 0.30977  26
  -5  -3   0-1.47240 2.35291  23
  -3  -5   0-0.24388 1.87381  21
  -5   3   0-0.31879 1.06018  23
   5  -3   0 1.27419 1.18361  22
   3   0  -5-0.34744 1.64111  22
  -3  -5   0 0.26844 2.10999  23
   0  -5  -3-0.31330 2.62161  21
  -3  -5   0-0.16522 0.78938  20
   3  -5   0-0.40814 2.06386  21
   5   0   3 0.36597 0.77190  20
   3   0   5 0.20744 0.90541  20
   0  -3   5 1.06360 1.07930  20
  -3   0  -5 0.93812 1.01439  19
   3   0  -5 0.28457 0.87519  19
  -3   0   5-0.81012 1.17439  17
  -3   5   0-0.42537 1.49524  18
  -5   3   0-0.35031 1.28990  18
  -5  -3   0 0.53191 0.27061  19
   0   3  -5 0.62653 0.97502  19
  -5   0  -3-0.18846 0.85883  19
  -3   0  -5-1.43477 0.97442  15
   3   0  -5-0.43139 1.36883  15
   5  -3   0-0.41600 0.72630  16
   0  -5   3-0.97176 1.37504  16
   5   0  -3-1.12313 1.11668  15
   3  -5   0-0.44890 1.31204  16
   0   3  -5 0.14970 1.33588  15
   0  -3   5 0.95666 1.16813   8
   5   3   0 0.74022 1.57857   7
   5   0   3-1.85600 2.40080   8
  -3   0   5 0.46829 1.44596   8
   3   0   5-2.46582 2.26709   8
   0   5  -3 1.46071 1.50675   7
   0   5   3 0.94533 2.09066   8
   0  -5  -3 1.84611 1.76619  12
  -5  -3   0-0.13549 1.19858  12
  -3   0   5 0.08822 0.79069  11
  -3   5   0-0.16324 1.26878  11
   5   3   0-0.24123 1.95824   8
   3   5   0 0.45582 1.94413   8
  -5   0  -3-0.65838 1.04074   9
  -5   3   0 0.83132 1.07690  11
  -2  -5   3 89.0718 7.75268   5
  -5  -2  -3 61.1225 7.04034   4
  -5   2   3 77.8571 7.25249   5
  -3  -5  -2 73.8085 7.31194   5
  -5  -3   2 68.4654 7.48676   4
  -5  -3   2 72.3711 7.79082   5
  -5  -2  -3 82.9932 7.53295   5
  -3  -2   5 101.485 8.38206   5
  -2  -5   3 73.0024 7.52935   4
  -2   3   5 92.1590 7.73635   2
   2  -5  -3 83.8484 8.20587   3
  -5   2   3 95.9604 7.78964   2
   2   3  -5 77.7447 7.48431   1
   5   2  -3 90.8585 7.63394   1
  -5  -2  -3 62.2320 7.54642  27
   3  -2  -5 91.5648 7.39175  28
  -5   3  -2 94.3981 8.26318  27
  -2   5  -3 105.154 8.78976  27
  -3   5   2 82.0216 7.56510  27
  -3   2  -5 73.5439 7.84245  27
   5  -3  -2 88.5958 7.58614  29
   5  -2   3 78.5974 7.35559  28
  -5   2   3 78.6808 7.38185  27
   5  -3  -2 88.5350 7.58356  28
  -2  -5   3 83.7971 7.10017  14
  -2   3   5 84.9431 8.02124  13
  -5  -3   2 79.2795 7.38313  14
  -3  -5  -2 78.1233 7.73460  12
   2  -5  -3 92.4200 7.67225  12
  -3   5   2 77.1519 7.57220  13
  -5   3  -2 83.0896 7.18543  14
  -3  -2   5 87.2409 7.48949  13
  -2   3   5 82.0697 7.52435   6
  -3   5   2 79.7665 7.91660   6
  -2   5  -3 85.5571 8.18538   6
  -3   2  -5 74.2115 6.85576   6
  -5   2   3 83.9463 7.61034   6
  -5   3  -2 84.2925 7.37607   6
   2   5   3 78.3319 7.87195   6
  -2  -3  -5 61.6864 7.73312  25
   3   5  -2 78.0739 7.56297  24
   5  -3  -2 75.5201 7.22839  24
  -3   2  -5 80.6008 7.95794  25
   2  -3   5 76.7511 6.91432  26
   5   2  -3 90.4076 7.84374  24
   5   2  -3 80.9122 6.96341  26
   3  -5   2 65.4977 7.23554  21
   5  -3  -2 77.3568 7.51458  22
  -3  -5  -2 62.2178 7.96703  23
  -3   2  -5 75.0179 7.03374  22
   3  -2  -5 99.9965 8.17614  22
  -5  -2  -3 69.8093 7.32025  21
  -3  -2   5 85.2478 7.30766  20
   3  -5   2 83.9361 7.51343  20
  -5  -3   2 66.9541 6.92885  20
   2  -3   5 77.9804 7.29710  20
   3   2   5 75.5613 7.10262  20
  -2  -5   3 79.2906 7.18494  20
   5  -2   3 86.6271 7.26020  20
   5  -2   3 73.1563 7.45706  17
   2   3  -5 82.4740 7.07555  19
  -3   2  -5 87.4431 7.29397  19
  -5  -2  -3 76.6712 7.03935  19
  -2  -5   3 87.2139 7.55937  16
   3  -5   2 69.9206 7.31353  16
  -3  -2   5 64.4822 7.06719  16
   2  -3   5 76.9910 7.78969  17
  -3   2  -5 81.1616 7.28790  15
  -2  -3  -5 74.1874 7.28196  15
   3  -2  -5 100.787 7.79143  15
   5  -3  -2 80.3744 7.49531  15
   2  -5  -3 70.0060 7.70681  15
   2   3  -5 80.8867 7.42215  15
   3   5  -2 85.0106 7.52473  15
  -5  -2  -3 67.0297 6.74103  15
   5   2  -3 85.0292 7.24751  15
   5   3   2 78.8850 7.75542   7
   3   2   5 77.0276 7.61653   7
  -3   5   2 82.6310 7.71368   7
   2   5   3 88.2225 8.22403   7
  -2   5  -3 79.2565 7.18103   7
   3   5  -2 75.1698 7.64121   7
   3   2   5 76.6678 8.21273   8
  -2   5  -3 69.5209 7.01408  11
  -5  -2  -3 85.0742 7.30790   9
  -3   2  -5 79.3090 7.25737   9
  -2   5  -3 74.8181 7.01622   9
  -3  -5  -2 77.5358 6.99753   9
  -2   3   5 81.9162 7.68849   8
   2   5   3 73.3633 8.18188   8
   2  -3   5 70.9844 7.16950   8
  -5   2   3 80.5125 7.31176  11
   5   3   2 76.1276 8.00673   8
   5  -2   3 59.4251 7.34955   8
  -3   5   2 66.4818 7.06725   8
  -3  -5  -4 6.33427 1.87883   5
  -5  -4  -3 3.49991 1.79856   5
  -4   3   5 4.34953 1.40463   5
  -4  -5   3 3.75485 2.27117   5
  -5  -3   4 5.54174 2.39109   5
  -3  -4   5 1.41671 2.03584   5
  -3  -4   5 4.32377 1.71789   4
  -4  -3  -5 2.30303 1.95517   5
  -5   4   3 6.04897 0.95679   5
  -5  -4  -3 1.65820 1.70818   4
  -4   3   5 5.65002 2.18741   2
   3  -4  -5 6.20038 2.63055   3
   4  -5  -3 3.38940 2.59769   3
   5   4  -3 1.46244 1.96643   1
  -5   4   3 4.93966 2.41423   2
   4   3  -5 4.26340 1.99067   1
  -4  -5   3 5.86824 1.92055   4
  -4  -3  -5 4.60774 1.50649   4
  -3   5   4 4.04693 1.21730  27
   5  -4   3 3.67465 2.11209  28
   5  -3  -4 3.38461 1.80347  28
   4  -5  -3 4.42762 1.41766  29
  -5   4   3 3.71022 1.61717  27
  -4  -3  -5 2.22380 1.67603  27
   4   5   3 4.10772 0.88755  29
  -5   3  -4 4.16480 2.80564  27
   3   5  -4 4.78784 1.80100  15
  -3   4  -5 4.12299 1.63622  15
  -3   5   4 6.05497 2.65280  13
   5   4  -3 3.18633 1.48050  15
  -4  -5   3 4.57685 1.51232  14
  -5   4   3 2.64359 1.96287  13
  -5  -3   4 2.02405 1.37918  14
   3   4   5 4.24147 2.66310   7
  -5   4   3 2.68597 2.13117   6
  -3   5   4 7.89898 2.41502   6
   4   5   3 4.32766 2.85027   7
  -4   5  -3 9.07473 2.53035   6
  -3   4  -5 6.54215 2.10765   6
  -4   3   5 5.92265 1.99672   6
  -3   5   4 4.48074 2.47372   7
  -4   5  -3 2.04818 1.04791   7
  -5   3  -4 5.19729 1.25535   6
   5   3   4 1.26156 2.38150   7
   3   5  -4 6.04369 2.51757  24
  -3   4  -5 3.88513 2.46215  25
  -3   4  -5 8.84878 2.98280  27
  -5   3  -4 5.59232 2.75131  25
   4  -3   5 3.11788 0.99663  26
  -4   5  -3 0.57902 2.19697  25
  -4   5  -3 2.37410 3.22281  27
   5  -3  -4 1.71465 1.66902  24
  -5  -4  -3 4.88491 3.16354  23
   5  -3  -4 5.28555 2.21515  22
  -5  -4  -3 2.71650 2.18677  21
   3  -4  -5 2.29913 2.69544  22
   5   4  -3 3.37327 2.13510  24
  -4  -3  -5 3.89553 2.64461  21
  -4  -5   3 3.76990 1.02025  20
   4  -3   5 3.77554 1.27811  20
  -3  -5  -4 12.3717 3.49699  21
   3  -5   4 3.55617 1.43018  20
  -3  -4   5 4.57122 1.35423  20
  -5  -3   4 4.32848 1.20622  20
   5  -4   3 5.09724 1.46884  20
   5  -4   3 1.74582 1.35502  16
  -4  -3  -5 4.17638 1.28256  19
  -3   4  -5 4.09889 1.37692  19
  -5  -4  -3 3.00145 1.05616  19
   4  -3   5 2.96443 1.87479  17
  -4  -5   3 5.28105 1.95270  16
  -5  -4  -3 2.54869 1.17621  15
  -5  -3   4 5.48108 1.54115  16
   4   3  -5 2.83512 1.56552  15
   3  -4  -5 3.14087 2.19314  15
  -3  -5  -4 9.97871 2.05174  15
   4  -5  -3 3.80008 2.27775  15
  -3  -4   5 3.75075 1.44333  16
   5  -3  -4 5.94578 1.75890  15
  -4  -3  -5 4.27510 1.17796  15
   3  -5   4 1.37048 1.41249  16
   5   3   4 2.16272 3.09445   8
  -3   5   4 7.69810 1.99844   8
  -4   3   5 4.78854 1.83887   8
   4   5   3 1.40409 2.68821   8
   3   4   5 5.73219 3.17454   8
   5   4  -3 3.55904 1.89369   7
  -5   3  -4 3.48165 1.40436  10
  -3   4  -5 5.95807 1.12078  10
  -3   4  -5 4.95848 1.16140   9
  -5   3  -4 4.73119 1.29328   9
  -4   3   5 2.79088 1.52696  11
  -5   4   3 2.54229 1.49058  11
  -5  -4  -3 5.90070 1.33193   9
  -4  -5   1 6.47431 2.09921   5
  -5  -4  -1 12.7178 2.25148   5
  -5  -1   4 14.3584 2.65529   5
  -5   4   1 15.5318 1.56868   5
  -4   1   5 12.0770 2.06631   6
  -4   1   5 14.7364 2.61082   5
   4   1  -5 10.6835 2.20506   1
  -5  -4  -1 13.5075 2.18801   4
  -4   1   5 12.5208 2.31587   2
  -5  -1   4 16.3264 2.14310   2
   5  -4   1 8.85606 2.52987   3
  -4  -1  -5 9.21993 1.08909   2
   4  -5  -1 11.0324 2.94089   3
  -1  -4   5 7.66311 1.75599   4
  -4  -5   1 6.66647 2.06279   4
   1  -4  -5 13.2444 2.76638   3
   5  -4   1 13.7932 2.34652  28
  -5   1  -4 9.98045 2.98138  27
  -4  -1  -5 8.46746 2.29997  27
  -5   4   1 10.8488 2.51783  27
  -4   5  -1 9.63300 3.53461  27
   5   4  -1 10.8584 1.76837  15
  -5  -1   4 16.3259 2.28069  13
  -5   4   1 14.2327 2.10544  13
  -4   1   5 13.0860 2.35422  13
   1   5  -4 17.9003 2.33966  15
  -4   5  -1 8.09167 1.34968  14
   1   4   5 7.64646 2.58774   7
   1   4   5 8.90968 2.15663   6
  -4   5  -1 6.41260 2.76492   6
   5   1   4 9.71569 2.13574   7
  -4   5  -1 7.06465 1.76414   7
   4   5   1 9.82637 2.59834   7
  -1   5   4 15.2009 2.78034   6
  -4  -1  -5 10.3961 2.94518  25
  -1   4  -5 13.1069 3.47507  27
   1  -4  -5 11.0882 2.35377  25
   5  -1  -4 11.2041 2.24140  24
   4   1  -5 7.37327 2.57802  24
   4  -1   5 11.2178 1.49620  26
   5  -1  -4 7.60118 2.07231  22
  -5  -4  -1 9.71367 2.24431  21
  -5  -4  -1 7.45722 3.07245  23
  -4  -5   1 9.50550 2.91592  23
  -5  -4  -1 12.2233 1.30297  19
   1  -5   4 11.8125 1.91218  20
  -1  -4   5 14.4236 1.85897  20
  -1  -5  -4 11.8561 3.53966  21
   5  -4   1 16.3644 2.17040  20
  -4  -1  -5 15.1001 2.77951  21
  -4  -5   1 11.7724 1.34380  20
   4  -1   5 8.92021 1.60550  20
  -5  -1   4 16.6510 1.57711  16
  -4   5  -1 7.62620 2.14583  18
   4  -1   5 11.8729 2.43809  17
  -5   1  -4 10.4217 1.66463  19
  -4   1   5 10.3270 1.62007  17
  -1   4  -5 12.1592 1.83692  19
  -4  -1  -5 13.2206 1.71486  19
   4   1  -5 11.5493 1.43779  19
  -5   4   1 13.5380 2.30165  18
   1  -5   4 9.65553 1.93816  16
  -1  -4   5 8.23666 1.81882  16
  -1  -5  -4 10.2753 2.30095  15
   4   1  -5 16.3407 2.12157  15
   5  -4   1 13.8053 1.74396  16
   1  -4  -5 13.2917 2.37649  15
   4  -5  -1 11.3697 1.93429  16
  -4  -1  -5 9.61997 1.43394  15
  -5   1  -4 12.3631 1.52648  15
   5  -1  -4 11.6666 2.09208  15
   4  -1   5 10.5818 2.53484   8
   1   5  -4 12.3748 2.14723   7
   5   1   4 7.94562 3.17440   8
   5   4  -1 12.8962 2.34275   7
  -1   5   4 11.3545 2.72030   8
  -4  -1  -5 14.4379 1.96220   9
  -5   1  -4 10.8208 1.74601   9
  -5   4   1 12.3195 1.99290  11
  -4   1   5 11.0982 1.76462  11
  -5  -4  -1 10.7271 2.08569  12
  -1   4  -5 12.2677 1.62332   9
  -4   5  -1 9.32268 1.88876  11
  -4  -1   5 9.41375 2.66428   5
  -5   1   4 10.2149 2.04355   5
  -5  -4   1 12.3374 2.47237   5
  -5   1   4 11.2100 2.03277   6
  -5  -1  -4 14.8466 2.42942   5
  -4  -5  -1 10.1399 2.02674   5
   1  -4   5 13.0581 1.84782   4
  -5  -1  -4 8.39888 1.37061   2
   5   1  -4 15.3872 2.33823   1
  -4  -5  -1 13.4221 2.49611   4
   1  -5  -4 11.1671 3.11925   3
   4  -5   1 4.26677 2.90901   3
  -5   1   4 12.8327 2.25958   2
  -1  -5   4 10.4291 2.04859   4
  -4  -1   5 13.3499 2.06379   2
   5  -4  -1 12.5680 2.43803  28
  -4   5   1 12.7638 2.86803  27
  -4   1  -5 12.8954 2.97981  27
   5   4   1 10.3360 1.65481  29
   4  -1  -5 15.3410 2.05455  28
  -5  -1  -4 10.1471 2.73458  27
  -5   4  -1 17.2916 3.23526  27
   4  -5   1 11.2445 2.53807  30
  -5  -4   1 10.0440 2.03008  12
  -5  -4   1 10.2979 2.06903  14
  -1   4   5 11.7669 3.15209  13
  -5   4  -1 8.24767 1.51062  14
   1   4  -5 18.2008 2.28552  15
   4   5  -1 11.5697 2.06794  15
  -4  -1   5 15.5258 2.37730  13
  -5   1   4 13.9005 2.28954  13
  -4   1  -5 9.43501 1.64282  15
  -4   5   1 10.7076 1.96959  13
  -5   4  -1 10.4170 2.26226   6
   5   4   1 10.2959 2.31887   7
  -1   4   5 12.8984 2.93589   7
  -1   4   5 10.9823 2.27232   6
   1   5   4 11.8719 3.20092   7
  -4   5   1 10.5199 2.06356   7
   1   5   4 15.7298 2.82806   6
   4   1   5 8.48859 2.03693   7
  -4   5   1 7.96668 2.59560   6
  -4   1  -5 12.9960 3.15727  25
   5  -1   4 12.4969 1.59003  26
  -1  -4  -5 8.59422 2.56855  25
   5   1  -4 15.5552 2.52297  24
   4   5  -1 15.3774 2.35182  24
   4  -1  -5 12.1739 2.45724  22
  -4  -5  -1 9.58248 2.95864  23
  -5  -4   1 15.2642 3.10933  23
  -5   4  -1 11.6666 1.98442  23
  -5  -4   1 11.1163 1.24144  20
  -5  -1  -4 10.9776 1.76548  21
   1  -4   5 14.1895 1.88668  20
   4   1   5 8.77809 1.49102  20
  -4  -5  -1 11.9571 1.41213  20
  -1  -5   4 14.6304 1.90487  20
  -4  -1   5 13.2656 1.89875  20
   5  -1   4 11.2867 1.60923  20
   4  -5   1 13.9414 2.26593  20
   1  -4   5 11.8492 2.00609  16
  -5   4  -1 10.9058 2.13620  18
   5  -1   4 8.56731 2.26181  17
   1   4  -5 13.4149 1.64036  19
  -5  -1  -4 13.0523 1.67644  19
   5   1  -4 12.8009 1.93419  15
  -4  -1   5 9.66723 1.45027  16
  -1  -4  -5 11.8940 2.20107  15
   4  -5   1 7.60689 1.89900  16
   4  -1  -5 15.1029 2.40067  15
   1  -5  -4 8.99710 2.43794  15
  -5  -1  -4 12.0826 1.28542  15
   1  -4   5 11.2464 1.70707   8
   4   1   5 10.1773 2.91473   8
  -1   5  -4 9.25760 1.80100   7
   4   5  -1 9.50671 2.30164   7
   1   5   4 9.85633 3.32920   8
   5  -1   4 13.0740 2.77395   8
  -1   4   5 15.7000 2.87301   8
  -5   1   4 11.4508 1.77307  11
  -5   4  -1 13.6320 1.95293  11
  -4   1  -5 14.1873 1.89028   9
  -4  -5  -1 9.85090 2.33142  12
  -4  -5  -1 10.9045 1.37477   9
  -4  -1   5 13.2499 1.56889  11
  -1   5  -4 11.9668 1.46262   9
   5   4   1 13.1826 2.77402   8
  -1   5  -4 10.7712 1.26075  11
   1  -5  -4 15.0737 2.26046  12
  -5   3   4 4.74299 2.03542   6
  -5   3   4 2.63673 1.12158   5
  -3  -4  -5 4.49748 1.78446   5
  -3  -5   4 5.79340 2.11061   5
  -5  -4   3 6.33547 2.22748   5
  -4  -3   5 8.16708 2.66444   5
  -5  -3  -4 4.93794 1.97496   5
  -4  -5  -3 6.48328 1.64481   5
  -5  -4   3 3.90881 1.76502   4
  -3   4   5 4.07400 1.17361   5
  -5   3   4 8.65619 2.18671   2
  -3  -5   4 3.28606 1.62539   4
   5   3  -4 4.19041 1.95961   1
  -5  -3  -4 4.18317 1.49869   4
  -4  -5  -3 5.81446 2.16565   4
   3   4  -5 3.67718 2.09556   1
  -4   5   3 3.08882 1.73335  27
   5  -3   4 2.83396 1.65628  28
  -5   4  -3 4.99577 2.59755  27
   4  -3  -5 5.06608 1.85231  28
  -4   3  -5 3.05512 2.56789  27
  -5   3   4 3.47579 1.34405  27
   5  -4  -3 6.71911 1.75045  29
  -4   5   3 5.20757 2.28031  13
  -3  -5   4 5.49494 1.28186  14
  -5   3   4 6.24442 2.13672  13
  -5  -4   3 4.50803 1.39552  14
   3   4  -5 4.35352 1.68325  15
  -4   3  -5 2.99331 1.47796  15
   4   5  -3 3.58045 1.73345  15
   3   5   4 9.67901 3.34132   7
   4   3   5 3.22129 2.31284   7
   5   4   3 3.10722 2.54490   7
   3   5   4 7.50100 2.30238   6
  -3   5  -4-0.53159 2.62910   6
  -4   5   3 4.36686 2.27708   6
  -5   4  -3 3.06794 1.71775   6
  -3   4   5-0.44633 1.99648   6
  -4   3  -5 4.08485 1.11317   6
   4   5  -3 2.57412 2.12952  24
   5   3  -4 2.80905 2.09808  24
  -4   3  -5 4.65755 2.57636  25
   5  -3   4 3.60959 1.09111  26
  -5   4  -3 6.36947 2.14142  25
  -3   5  -4-1.05255 3.04116  27
   3   4  -5 1.82359 2.34792  24
  -3   5  -4 3.97560 2.35534  25
   5  -4  -3 8.22135 2.30519  22
  -4  -5  -3 5.87370 2.95420  23
  -4   3  -5 4.33499 0.95254  22
   4  -3  -5 2.82056 2.39151  22
  -4  -3   5 3.93306 1.29107  20
   5  -3   4 5.38556 1.45669  20
  -3  -4  -5 3.70916 3.22752  21
   3  -4   5 5.32541 1.51341  20
  -5  -3  -4 3.06543 2.22726  21
  -3  -5   4 4.18045 1.16474  20
   4  -5   3 7.57647 1.81917  20
  -5  -4   3 3.80444 1.01206  20
  -4  -5  -3 5.16835 2.67046  21
  -5  -3  -4 4.53046 1.15020  19
  -4   3  -5 2.64632 1.23964  19
   5  -3   4 2.68956 1.88060  17
   3  -5  -4-0.25892 1.95051  15
   4  -3  -5 5.62225 1.92817  15
  -4  -3   5 2.43378 1.17912  16
  -5  -3  -4 2.12777 0.90937  15
   5  -4  -3 3.56951 1.91730  15
   4  -5   3 4.70217 1.56554  16
  -3  -4  -5 3.02681 1.52246  15
  -3  -5   4 5.43198 1.59854  16
   5   3  -4 8.38185 1.61207  15
   4   5  -3 0.22901 2.05599   7
   5   4   3 7.03650 2.92144   8
  -3   4   5 5.52495 1.95838   8
   4   3   5 6.33906 3.16206   8
  -3   5  -4 2.99121 1.07468   7
  -4   5   3 3.76993 1.42364   8
  -3   5  -4 3.37128 1.06053   9
  -4   3  -5 4.89132 1.29470  10
  -5  -3  -4 4.82026 1.42235   9
  -4  -5  -3 5.77075 1.20048   9
   3  -5  -4 7.04799 1.65301  12
  -4   3  -5 3.26641 1.31984   9
  -5   3   4 2.47811 1.42724  11
  -5   0   5 19.7777 3.65126   5
  -5  -5   0 32.3567 3.66602   4
   0  -5   5 27.6612 3.30292   4
  -5  -5   0 26.1641 3.51694   5
   5  -5   0 28.2530 4.14963   3
   0  -5  -5 26.8417 4.16018   3
  -5   0   5 21.9441 3.34165   2
  -5   0  -5 23.4282 3.92714  27
  -5   5   0 24.3395 4.29552  27
   5  -5   0 28.3103 3.71642  28
  -5  -5   0 26.5033 3.44190  12
  -5   0   5 29.6498 3.58485  13
  -5   5   0 27.9789 3.83647   6
   0   5   5 26.2671 3.67745   6
   0   5   5 22.2962 3.97941   7
   5   0  -5 24.1584 3.75994  24
   5   0   5 25.2771 2.83778  26
   5   0  -5 24.5712 3.49440  22
  -5  -5   0 16.1062 3.94271  23
  -5   0  -5 26.7289 2.94118  21
   5   0   5 26.4546 2.83426  20
  -5  -5   0 26.2660 2.40739  20
   5  -5   0 28.5368 3.05824  16
   0   5  -5 27.8127 2.95052  19
  -5   0  -5 23.9292 2.94498  19
  -5   0   5 24.9949 2.51203  16
   0  -5  -5 25.2968 3.69368  15
  -5   0  -5 26.8229 2.70824  15
   0   5  -5 33.1570 3.57659  15
   5   0  -5 22.4480 3.31602  15
   5   0   5 19.2476 3.89655   8
   0   5  -5 24.1373 3.13402   7
   5   5   0 37.0362 3.95088   7
   0   5   5 26.8343 4.20244   8
  -5   0  -5 26.6124 3.11867   9
   5   5   0 23.0754 3.86239   8
  -5   5   0 26.8289 3.20994  11
  -5   0   5 24.8427 2.90560  11
  -5  -5   2 41.9753 5.07618   4
  -5   2   5 45.9984 5.01975   5
  -5  -2  -5 58.4557 5.49567   5
  -2  -5   5 45.8922 5.30622   5
  -5  -5   2 44.9516 5.38613   5
  -5  -5  -2 53.3406 5.15225   5
  -2  -5   5 37.3745 4.84601   4
  -5  -5  -2 43.6870 5.17347   4
   5  -5   2 49.2027 5.51357   3
   2  -5  -5 53.1451 5.84494   3
  -5   2   5 68.2885 5.66056   2
   5  -5  -2 50.6233 5.75978   3
  -5  -2   5 42.5142 4.93987   2
   5  -2  -5 57.6375 5.18662  28
  -2   5  -5 54.8565 6.57974  27
   5   5   2 44.0141 4.47888  29
  -5   5   2 49.4065 5.34753  27
   5  -5  -2 46.1747 4.88841  29
  -5   2  -5 40.7462 5.60304  27
  -5  -2  -5 35.9864 5.24282  27
   5  -5   2 42.9876 5.29400  30
   5  -5   2 52.3697 5.45791  28
   5  -5  -2 43.2040 5.30572  28
  -5   2   5 58.5377 5.53159  13
  -5  -5   2 40.7880 4.81003  14
  -2   5   5 47.0539 5.92404  13
  -5   5   2 45.8966 5.10680  13
  -5  -2   5 62.7793 5.36019  13
  -5   5  -2 48.0567 4.43563  14
  -2   5  -5 47.7019 5.86635   6
   2   5   5 40.3615 5.22815   6
  -5   5  -2 42.3949 5.23741   6
  -5   2   5 59.9352 5.28661   6
  -2   5   5 37.7652 5.19304   6
  -5   5   2 45.8536 5.49784   6
  -5   2  -5 38.2496 4.17916   6
   5  -2   5 55.9601 4.59096  26
   5   2  -5 61.5857 5.93969  24
   5   5  -2 57.7464 5.53573  24
  -2   5  -5 41.7403 5.48706  25
  -5   2  -5 34.2205 5.60313  25
  -5  -2  -5 49.0384 5.43642  21
  -5  -5  -2 44.5097 5.48096  21
  -5  -5  -2 30.9828 5.91037  23
  -2  -5  -5 60.4818 6.66702  21
   5  -2  -5 56.1309 5.59387  22
  -5  -5  -2 49.8666 4.26858  20
   5  -2   5 47.7137 4.73208  20
  -5  -5   2 41.7125 4.36385  20
   5  -5   2 52.2999 5.16402  20
  -5  -2   5 52.4204 4.84685  20
  -2  -5   5 41.5788 4.72636  20
   2  -5   5 52.6041 5.01429  20
  -5  -2  -5 55.5039 4.79967  19
  -2  -5   5 44.3696 4.88592  16
  -5   2  -5 47.4522 4.78987  19
   2  -5   5 39.6601 4.86132  16
  -5   2   5 48.8481 4.44008  17
  -5  -2   5 53.5843 4.68188  16
   5  -5   2 45.9488 4.82307  16
   2   5  -5 49.0272 4.60717  19
   5  -2   5 39.4481 5.21283  17
  -2   5  -5 46.0792 4.82900  19
  -5   2  -5 44.6463 4.63023  15
   5   2  -5 59.7385 5.12820  15
   2   5  -5 49.5016 5.13941  15
   2  -5  -5 42.7092 5.37877  15
  -5  -2  -5 48.0106 4.36838  15
  -2   5  -5 46.4502 5.14442  15
   5   5  -2 51.6150 4.96520  15
   5  -5  -2 37.3070 5.19542  15
   5  -2  -5 77.5296 5.56566  15
  -2  -5  -5 49.7426 5.17442  15
   5   2   5 44.0509 6.01290   8
   5   5   2 34.4475 5.65225   8
   5   5   2 40.6227 5.58634   7
   2   5  -5 42.4502 5.04969   7
   5   2   5 39.1947 5.14931   7
   2   5   5 51.9407 6.04821   7
  -2   5  -5 33.7688 4.53391   7
   5   5  -2 47.3411 5.37150   7
  -2   5  -5 43.9976 4.55541   9
  -5   5  -2 41.7560 4.70325  11
  -5  -5  -2 46.2652 4.54481   9
  -5  -2  -5 53.8842 4.96594   9
  -5   2  -5 36.9261 4.72472   9
  -2   5   5 51.9452 5.42814   8
  -2   5  -5 45.8314 4.32059  10
  -5   2   5 50.4257 4.86386  11
  -5   5   2 48.5156 5.08963  11
  -5  -5   4 21.2417 3.62011   5
  -5  -4   5 21.0206 3.78595   5
  -5  -5  -4 16.8483 2.80615   5
  -5  -5   4 16.7953 2.94415   4
  -4  -5   5 15.6351 2.91685   4
  -5  -4  -5 18.0891 3.05770   5
  -5   4   5 19.9089 2.21748   5
  -4  -5  -5 24.2548 3.22340   5
  -4  -5   5 18.5056 3.50221   5
  -5   4   5 27.8761 3.83462   2
   5  -5  -4 19.3907 3.87861   3
  -5  -4  -5 20.2118 2.86358   4
  -5  -5  -4 21.1699 3.25328   4
  -5   4  -5 9.89706 3.73644  27
   5  -5  -4 15.8635 2.74348  29
   5  -5  -4 19.0122 3.50536  28
  -5   5  -4 21.5147 4.75853  27
   5  -4  -5 19.0763 3.14381  28
  -5   5   4 13.0522 2.51797  27
  -5  -4   5 21.0069 2.65005  14
  -4   5   5 25.0200 3.89796  13
   4   5  -5 18.3356 2.94010  15
  -4   5  -5 23.2340 3.14942  15
  -5   5   4 25.7714 3.60328  13
  -5  -5   4 21.8300 2.68731  14
  -4  -5   5 19.7472 2.46444  14
   5   5  -4 15.6322 2.77037  15
  -5   4   5 24.4521 3.64952  13
   4   5   5 17.7537 4.10669   7
  -5   4  -5 17.1087 2.42282   6
  -4   5   5 17.0082 3.49567   6
   5   5   4 18.3245 3.91771   7
   5   4   5 21.6088 3.88794   7
  -5   5   4 25.6834 3.73210   6
  -5   5  -4 22.2775 3.06781   6
  -5   4   5 18.8009 3.26122   6
  -4   5  -5 20.6964 3.14957   6
   5   4  -5 13.1483 3.50991  24
  -4   5  -5 14.9591 3.66553  25
   5   5  -4 18.3184 3.45693  24
   4   5  -5 19.6953 3.67725  24
  -5   5  -4 19.4339 3.47035  25
   5  -4   5 23.8247 2.33049  26
  -5   4  -5 14.5181 3.61298  25
  -4   5  -5 21.8907 4.31360  27
   5  -4  -5 18.5122 3.67801  22
  -5  -5  -4 14.5596 4.21038  23
   4  -5  -5 20.0303 4.07564  22
   5  -5  -4 15.9447 3.76467  22
  -5  -5   4 17.2160 2.32414  20
  -5  -5  -4 20.7293 2.47995  19
   5  -5   4 19.5083 2.83348  20
  -4  -5   5 17.8059 2.39170  20
   5  -4   5 21.0300 2.74770  20
  -4  -5  -5 21.9191 4.31260  21
  -5  -4  -5 27.6368 4.25379  21
  -5  -5  -4 25.2253 3.92030  21
  -5  -4   5 18.3680 2.44599  20
   4  -5   5 23.5474 2.81478  20
  -5  -4  -5 22.8595 2.62515  19
  -4  -5  -5 14.8702 2.52841  19
  -5   4  -5 15.2942 2.60899  19
  -4   5  -5 17.5324 2.68484  19
   4  -5   5 18.0172 2.70822  16
   4  -5  -5 15.3746 3.44445  15
  -4  -5  -5 14.4622 2.72033  15
  -5  -5   4 23.9473 3.24543  16
  -4  -5   5 22.5168 2.85362  16
   5  -5   4 13.2256 2.65003  16
  -5  -5  -4 15.4378 2.53748  15
  -5  -4  -5 12.4780 2.31208  15
   5  -5  -4 13.5070 3.19869  15
  -5  -4   5 23.8626 2.93697  16
   5   4  -5 20.3974 2.89804  15
   5  -4  -5 17.5383 3.35443  15
   5   5   4 17.2450 4.26221   8
   5   5  -4 15.0266 3.04189   7
   5   4  -5 15.2157 3.06205   7
  -4   5  -5 17.2540 2.05301   7
  -5   5   4 23.4371 2.91780   8
   5   4   5 14.6170 4.35756   8
  -5   4   5 24.5946 3.22108   8
  -4   5   5 19.1401 2.99825   8
   4   5   5 20.3207 4.74462   8
  -5  -4  -5 18.7014 2.65129   9
  -4   5  -5 20.5829 2.47551   9
  -5   5   4 19.1593 3.06369  11
  -5   4  -5 17.9156 2.50181   9
  -4   5  -5 22.4935 2.40338  10
  -5   4  -5 17.2491 2.53396  10
  -5   4   5 19.7477 2.98659  11
  -5  -5  -4 17.6119 2.43040   9
   0  -6   0 6.65003 1.16935   5
  -6   0   0 2.59526 1.32301   2
   6   0   0 4.70120 1.56418  29
   0   0   6 3.95660 2.26090  13
   0   6   0 7.24876 2.12235   7
   0   6   0 6.72482 2.50612   6
   0   0  -6 2.58118 1.41020  27
   6   0   0 4.24522 0.98359  26
   0   0  -6 3.27112 1.98090  25
  -6   0   0 2.21166 2.02883  23
   0   6   0 7.15653 0.93745  24
   0   0  -6 4.13723 1.83833  22
   0  -6   0 4.94406 2.37195  21
   0   0   6 2.15269 1.26113  20
  -6   0   0 3.30724 0.96295  18
   0   0  -6 3.75925 1.17398  19
   0  -6   0 5.59184 1.77730  16
   0   0   6 5.71642 2.01237   8
   6   0   0 2.88836 1.12819   7
   0   6   0 4.78371 1.59539   8
  -6   0   0 2.80629 1.35128  10
  -1  -6  -1 174.843 17.7833   5
  -6   1   1 206.052 18.0490   5
  -6   1  -1 209.973 18.0715   5
  -1  -6   1 205.466 18.0457   5
   1  -6   1 165.100 17.7918   5
  -6  -1  -1 209.745 18.2634   5
  -6   1  -1 179.417 17.9904   2
   6   1  -1 234.924 18.1875   1
  -1   1  -6 229.139 17.7329   1
   1   1  -6 196.820 17.8685   1
  -1  -1  -6 210.851 17.7756   3
  -1  -1   6 163.603 17.7208   2
  -6  -1  -1 153.454 17.8087   2
  -1   1   6 204.774 17.9521   2
  -6   1   1 216.806 18.2054   2
   6   1   1 188.749 17.9127   1
  -1   1  -6 190.479 18.1437  27
  -6   1   1 185.533 18.2904  27
   6  -1  -1 260.888 18.4574  29
  -6  -1  -1 187.871 18.4332  27
  -6   1  -1 177.585 18.4223  27
  -1  -1   6 197.804 18.1566  13
  -6  -1   1 233.646 18.1958  14
   1  -1   6 187.602 18.2789  13
  -6   1   1 187.262 18.0042  14
  -6   1  -1 202.594 18.0412  14
  -1   1   6 194.773 18.4381  13
  -6   1  -1 177.490 17.8091   6
  -1   6   1 207.484 18.8346   6
  -6   1   1 178.902 17.9583   6
  -1   1   6 180.206 17.7548   6
   1   6   1 177.854 18.4932   6
   1  -1  -6 210.462 18.3042  25
  -1   1  -6 197.315 18.4102  25
   6  -1   1 215.217 17.8483  26
   1   6  -1 183.922 17.8434  24
   6   1   1 219.140 17.8431  26
   6  -1  -1 236.756 18.2415  24
  -1  -1  -6 194.216 18.4692  25
   6   1  -1 272.469 18.5132  24
   6   1  -1 239.964 17.8347  26
  -1  -1  -6 197.861 18.2749  22
  -6   1  -1 195.514 18.5016  23
  -1  -6  -1 141.039 18.1245  23
   1  -6  -1 187.400 18.6107  21
   1   1  -6 191.753 18.1365  22
  -1  -6  -1 198.769 18.7813  21
  -1  -6   1 206.908 18.5200  21
   1  -6   1 184.119 18.3650  21
  -6  -1  -1 192.631 18.7388  23
  -6  -1   1 223.864 18.8042  23
  -6   1   1 215.367 18.3366  23
   6  -1  -1 196.179 17.8893  22
  -1   1  -6 199.590 18.0756  22
  -1  -6   1 215.197 18.0770  20
   1  -1   6 200.669 17.9718  20
  -1  -1   6 210.474 18.0418  20
   6  -1   1 213.975 17.8614  20
  -1  -1  -6 210.603 17.9959  19
   1   1   6 199.463 17.9446  20
  -1   1   6 220.880 18.0747  20
   1  -1  -6 231.093 18.0372  19
   1   1  -6 217.087 17.8948  19
  -1  -1   6 197.406 18.3158  17
   1   6  -1 200.989 18.2020  18
   1  -6   1 216.863 18.2992  16
  -1   1  -6 210.298 17.9410  19
  -6  -1  -1 213.380 17.6558  19
  -6   1   1 205.980 18.0053  18
  -1  -6   1 227.397 18.4960  16
  -1   6  -1 189.643 18.2594  18
   6  -1   1 160.824 17.8119  17
   6  -1  -1 225.528 17.8517  15
  -1  -1  -6 206.972 17.9947  15
   1  -1  -6 230.341 18.1721  15
   1   1  -6 209.816 18.0719  15
  -1   1  -6 197.313 17.9800  15
   6   1  -1 223.658 18.1238   7
  -1   6  -1 218.130 18.3293   7
  -1   6   1 212.160 18.5385   7
   1   6  -1 201.585 18.3449   7
   6   1   1 197.257 18.0479   7
  -1  -1   6 217.970 18.1873   8
  -1   1   6 232.520 18.4067   8
   6   1   1 174.833 18.3849   8
   1  -1   6 206.411 18.2261   8
   1   6  -1 183.112 18.1067   8
   1   6   1 200.731 18.4182   8
   1   1   6 216.366 18.5249   8
  -1   6  -1 183.358 17.8272   8
  -6   1  -1 215.875 18.0703  10
  -6  -1   1 233.975 18.0779  10
  -6  -1  -1 217.526 18.0720  10
  -1   6   1 197.356 18.1089   8
   6  -1   1 183.327 18.2274   8
   0  -6   2 80.1363 8.82161   5
  -6  -2   0 94.6734 9.19544   5
  -2  -6   0 83.5560 8.80520   5
  -6   2   0 100.368 8.82769   5
  -6   0  -2 95.8301 9.06151   5
  -6   0   2 108.662 9.15695   5
   6   2   0 93.0383 8.91177   1
   0   2  -6 103.037 8.81313   1
  -6   0   2 103.760 9.04723   2
  -6   2   0 91.1485 9.07266   2
  -2   0   6 91.7004 8.78636   2
   0  -2  -6 92.8063 8.83275   3
  -6   0  -2 77.3681 8.67787   2
   6   0   2 82.8987 8.61796   1
   6   0  -2 114.451 9.30002  29
  -6   0  -2 82.4672 9.30626  27
  -2   0  -6 91.8748 9.09523  27
  -2   6   0 108.387 9.77768  27
   2   0  -6 97.6527 8.53068  28
   6  -2   0 92.2768 8.98180  28
   6   2   0 99.8205 8.98803  29
   0   2  -6 107.542 9.44220  27
  -6   2   0 88.8102 9.30104  27
   0  -2   6 85.3217 8.85179  13
  -6   0   2 102.299 8.99208  14
  -6  -2   0 97.2577 9.01657  14
   0  -6  -2 101.282 9.39415  12
  -6   2   0 86.9836 8.80357  14
  -2   6   0 75.3963 8.69624  13
  -2   0   6 102.995 9.27292  13
  -6   2   0 90.0941 8.87428   6
  -2   6   0 96.1105 9.74537   6
   0   6   2 80.3935 9.50950   6
   0   2   6 80.8568 8.60016   6
   6   0   2 102.551 8.69205  26
   6   2   0 102.932 8.68055  26
   0  -2  -6 89.9347 9.25411  25
   6   0  -2 106.092 8.62680  26
  -2   0  -6 93.1981 9.53574  25
   6   0  -2 108.376 9.19185  24
   2   0  -6 97.1346 9.20877  22
   0  -6   2 90.9381 9.21317  21
  -6   2   0 89.8262 8.98462  23
  -2   0  -6 92.1341 8.98333  22
   0  -2  -6 103.662 9.51996  22
   0   2  -6 89.5105 8.91369  22
   0  -6  -2 79.1896 9.57865  21
  -2  -6   0 101.702 9.61443  21
   2  -6   0 78.7134 9.26135  21
  -2  -6   0 96.7950 9.51212  23
  -6   0  -2 91.0482 9.75704  23
  -2  -6   0 104.295 8.88176  20
  -2   0   6 101.458 8.93356  20
   0  -2   6 95.0160 8.87232  20
   0  -2  -6 99.3677 8.89289  19
   2   0   6 93.7309 8.75005  20
   2   0  -6 105.315 8.78515  19
   0  -6   2 110.394 9.05570  20
   0   6  -2 81.3284 8.94896  18
  -2   0  -6 102.869 8.82675  19
   0  -6   2 98.7805 9.11733  16
   0  -2   6 95.1516 9.26306  17
   0   2  -6 91.0784 8.70245  19
  -2   6   0 90.2624 9.22171  18
   2  -6   0 108.368 9.21053  16
  -6   0  -2 101.727 8.63894  19
  -6   2   0 99.8585 8.95684  18
  -2   0   6 96.6184 9.11576  17
  -2   0  -6 91.5813 8.73560  15
   0  -2  -6 100.856 9.02903  15
   6   0  -2 102.653 8.67776  15
   2   0  -6 104.160 8.99441  15
  -2   6   0 92.2073 9.23968   7
   6   2   0 93.4908 8.99098   7
   0   6  -2 95.3034 9.10642   7
  -2   0   6 101.225 9.07105   8
  -6  -2   0 99.6080 8.89121  10
   0  -2   6 93.1005 8.94982   8
   6   0   2 91.1882 9.41291   8
  -6   0  -2 101.383 8.93648  10
   0   2   6 102.728 9.47148   8
   2   6   0 93.5837 9.33263   8
   0   6   2 92.4012 9.33488   8
  -2   6   0 91.7470 8.60185   8
   2   0   6 95.1799 9.32672   8
  -6   2  -2 2568.59 178.302   5
  -6  -2  -2 2124.38 178.351   5
  -6   2   2 1998.42 177.987   5
  -2  -6   2 2111.77 178.305   5
  -6  -2   2 1876.01 178.395   5
  -2  -6  -2 1849.44 177.906   5
  -2  -6   2 2359.62 178.602   4
   6   2  -2 2297.09 178.285   1
   6   2   2 2026.10 177.976   1
   2   2  -6 2093.87 178.100   1
  -2   2   6 2460.40 178.301   2
   2  -6  -2 2245.97 178.864   3
  -6   2  -2 2064.46 178.126   2
  -6   2  -2 1947.94 178.625  27
   6  -2   2 2075.78 178.292  30
  -6   2   2 1762.36 178.148  27
  -2   2  -6 1939.20 178.368  27
  -2   6   2 2182.21 178.342  27
   6  -2   2 2053.35 178.168  28
   6  -2  -2 2262.07 178.269  28
   6  -2  -2 2459.26 178.462  29
  -6  -2   2 2197.65 177.825  12
  -6  -2   2 2251.01 178.207  14
  -2   6   2 1818.19 178.348  13
  -6   2  -2 2081.06 178.081  14
  -2   2   6 2199.91 178.620  13
  -2  -6  -2 1892.38 178.504  12
  -2  -2   6 2126.30 178.155  13
  -6   2   2 1892.02 178.145   6
  -2   2   6 2131.00 178.053   6
  -2   6  -2 2121.45 178.873   6
  -2   6   2 2064.56 178.751   6
  -6   2  -2 1847.93 177.887   6
   2   6   2 1820.69 178.406   6
   2   6  -2 1849.12 178.145  24
   6   2  -2 2227.95 178.457  24
   2  -2   6 2084.33 177.718  26
   6  -2  -2 1994.35 178.123  24
  -2  -2  -6 1828.18 178.517  25
   6   2  -2 2154.49 177.829  26
   6  -2   2 2120.58 177.926  26
   2  -2  -6 2242.00 178.279  25
   2  -6  -2 1927.95 178.680  21
   2  -6   2 1878.15 178.194  21
  -2   2  -6 1902.25 177.947  22
  -2  -6  -2 2075.31 178.976  21
   6  -2  -2 1970.97 178.066  22
  -2  -6  -2 1438.46 178.235  23
   2  -2  -6 2487.46 178.698  22
  -2  -2  -6 2111.21 178.110  19
   6  -2   2 2072.86 177.999  20
   2  -6   2 2181.70 178.337  20
   2  -2   6 2131.33 178.092  20
   2   2   6 2015.71 177.966  20
  -2  -6   2 2294.96 178.068  20
   2  -2   6 1902.46 178.436  17
  -2   6  -2 2064.33 178.356  18
   2   2  -6 2082.95 177.886  19
   6  -2   2 1788.65 178.036  17
   2   6  -2 1926.80 178.076  18
  -2   2  -6 2224.97 178.066  19
   2  -6   2 2349.07 178.355  16
  -6  -2  -2 1989.93 177.733  19
  -2  -2  -6 1950.85 177.979  15
   6   2  -2 1996.27 177.839  15
   2  -2  -6 2724.33 178.514  15
   2   2  -6 2072.20 178.144  15
  -2   2  -6 2216.08 178.141  15
   6  -2  -2 2300.18 178.130  15
   2   6  -2 1963.48 178.362   7
  -2   6  -2 2102.33 178.140   7
   2   2   6 2088.51 178.342   7
   2   6   2 2302.73 178.839   7
   6   2  -2 2022.46 178.246   7
  -2   6   2 2143.45 178.574   7
   6   2   2 2163.26 178.324   7
  -6  -2  -2 1996.36 178.014   9
  -2   6   2 2024.21 178.060   8
   2   6   2 2017.13 178.638   8
  -2  -2   6 2249.09 178.246   8
   6   2   2 1908.17 178.620   8
  -6  -2   2 2235.57 178.040  10
   2  -2   6 2030.60 178.156   8
  -2   6  -2 1827.44 177.656   8
  -6   2   2 1979.00 178.075  11
  -2   6  -2 1840.58 177.986  11
   2   2   6 2241.79 178.808   8
  -6  -1   3 30.5838 3.94610   5
  -6  -3  -1 31.3599 3.68703   4
  -6  -3  -1 28.8576 3.78316   5
  -3  -6   1 27.4103 3.69384   5
  -6   3   1 27.1247 3.31374   5
  -3   1   6 31.6229 4.25298   5
   3  -6  -1 34.8868 4.74863   3
   1  -3  -6 36.0684 4.00348   3
  -3   1   6 35.0968 3.79228   2
   3   1  -6 26.9374 3.61470   1
  -6  -1   3 40.2202 3.83214   2
  -3  -6   1 29.3981 4.04877   4
  -6   3   1 34.6515 4.12164   2
   6   3  -1 36.4259 3.90772   1
  -6   1  -3 28.2719 3.44763   2
   6   3  -1 32.8662 3.72092  29
  -6   3   1 27.8203 4.00912  27
  -3  -1  -6 28.1037 3.82335  27
   6  -1  -3 38.9568 4.17948  29
  -6   1  -3 32.4960 4.57715  27
   6  -3   1 35.8758 3.89865  28
  -3   6  -1 31.1972 3.00361  13
  -6  -1   3 30.7674 3.62113  14
  -1  -3   6 31.4974 3.44803  13
  -3   1   6 38.0816 4.11725  13
  -6   3   1 30.8150 3.81276   6
  -1   6   3 33.8217 4.63694   6
  -3   1   6 23.9632 3.37529   6
  -3   6  -1 35.3922 4.72262   6
   3   6   1 30.3974 4.43329   7
  -1   6   3 30.5585 4.52013   7
  -3   6  -1 29.7517 3.19202  25
  -1   3  -6 31.2806 4.46429  27
   6   3  -1 45.1316 4.23279  24
   1  -3  -6 29.0059 4.05810  25
   6   1   3 36.7289 3.35959  26
   3  -1   6 31.1308 3.14641  26
  -3   6  -1 36.5128 4.83841  27
  -3  -1  -6 29.6780 4.50954  25
   6  -1  -3 26.3456 3.68871  24
  -6  -3  -1 19.5493 4.56907  23
  -1  -6  -3 23.5321 4.04383  23
   1  -3  -6 33.5079 4.59169  22
  -3  -6   1 33.8480 4.16937  21
   3   1  -6 27.6462 3.80189  22
   6  -1  -3 24.6931 3.59542  22
  -1  -6  -3 29.4685 4.80272  21
   6  -3   1 31.2673 3.56967  20
  -3  -6   1 34.2579 3.28086  20
   3  -1   6 30.5848 3.39319  20
   3  -6  -1 27.3288 4.21917  21
  -6  -3  -1 30.2288 2.90449  19
   3  -1   6 25.3616 3.99180  17
   1  -6   3 31.4948 3.71495  16
  -3   6  -1 23.3045 3.67455  18
  -6   3   1 31.3883 3.83272  18
   3  -6  -1 29.0881 3.73594  16
   3   1  -6 33.4313 3.24347  19
  -6   1  -3 34.5302 3.34423  19
  -1   3  -6 31.9955 3.40849  19
   6  -1  -3 37.6293 3.60774  15
   1   6  -3 31.4537 3.90082  15
  -3  -1  -6 31.5856 3.31435  15
  -1   3  -6 33.1725 3.69095  15
   3   1  -6 28.9765 3.64047  15
   1   3   6 35.4949 4.37941   7
   1   3   6 34.3909 4.66779   8
   6   3  -1 33.7010 3.93830   7
   1   6  -3 27.3476 3.77234   7
  -3   6  -1 36.3607 3.83186   7
   3   6   1 28.4620 4.35000   8
   6   1   3 29.1831 4.39819   8
  -1   6   3 30.8404 4.18246   8
   3  -1   6 28.5715 4.00589   8
  -3   6  -1 29.6208 3.57729  11
  -6   1  -3 36.4297 3.73182  10
  -3   1   6 40.1254 3.89050   8
  -6   3   1 30.6152 3.52163  11
  -1  -3   6 35.1894 3.67542   8
  -6   1  -3 34.7390 3.55684   9
  -1  -6  -3 29.7488 4.05938  12
  -3  -1   6 42.3615 4.62502   5
  -6   3  -1 35.1812 3.55653   5
  -6  -1  -3 29.9666 3.70936   5
  -6   1   3 28.8855 3.56185   5
  -3  -6  -1 26.0967 3.46167   5
  -1  -6   3 29.6796 3.70469   5
  -6  -3   1 27.5731 3.86229   5
  -3  -1   6 33.3974 3.52999   2
   6   1  -3 34.0110 3.82398   1
  -6  -1  -3 21.5269 3.11631   2
  -6   3  -1 30.9959 3.92871   2
  -6   1   3 26.0688 3.73913   2
   6   3   1 34.6232 3.68208   1
  -1  -3  -6 35.9352 3.99216   3
   3  -1  -6 35.7509 3.33775  28
   3  -6   1 29.9615 4.06949  30
   6  -3  -1 35.6887 3.85581  29
   6   3   1 41.2753 3.65315  29
  -6  -1  -3 20.2505 4.10228  27
   6  -3  -1 38.3603 3.87468  28
  -3   1  -6 28.5269 4.02199  27
   1  -6  -3 32.3098 3.95091  12
  -6  -3   1 27.8917 3.28664  12
  -3  -6  -1 18.6759 3.85089  12
  -6  -3   1 37.1818 3.76828  14
  -6   3  -1 28.2859 3.32934  14
  -3  -1   6 31.7233 3.68481  13
  -3   6   1 27.2978 3.57692  13
  -1   3   6 30.9411 4.63506  13
  -6   1   3 31.7980 3.66096   6
  -1   6  -3 27.8257 4.48194   6
  -6   3  -1 32.1272 3.65095   6
   1   6   3 34.1890 4.51200   7
  -3   6   1 26.4532 4.49829   6
  -1   3   6 27.1375 3.47819   6
   1   6   3 37.1933 4.52830   6
   6   1  -3 30.6415 3.89670  24
   1  -3   6 29.9490 2.87236  26
   6   1  -3 30.2355 3.04869  26
  -1  -3  -6 23.2858 4.20926  25
   3   6  -1 36.2168 3.64225  24
   6  -1   3 32.8259 3.22872  26
   6  -3  -1 32.5274 3.40544  24
  -3   6   1 30.0309 4.30259  27
  -6  -3   1 38.4095 4.75820  23
  -3   1  -6 29.4209 3.48182  22
  -6   3  -1 30.1670 3.80578  23
   3  -1  -6 35.4849 4.13924  22
  -3  -6  -1 18.7292 4.29425  23
  -3  -6  -1 35.6781 4.64874  21
  -1  -6   3 36.2630 3.51724  20
   1  -3   6 29.6920 3.42544  20
   3  -6   1 35.2520 3.88925  20
   6  -1   3 33.0588 3.23036  20
   3   1   6 33.6648 3.32065  20
  -3  -1   6 37.9841 3.62585  20
  -3  -6  -1 25.5530 3.26434  20
   1  -6  -3 28.5091 4.71510  21
   3  -6   1 23.9467 3.80104  21
   1   3  -6 33.3075 3.29979  19
   1  -3   6 27.4642 4.04700  17
  -6   3  -1 33.8615 3.73814  18
   3  -6   1 33.4117 3.67684  16
   6  -1   3 20.7188 3.56593  17
  -6  -1  -3 31.5429 3.17708  19
  -3   1  -6 32.9959 3.43490  19
  -1  -6   3 36.2271 3.79247  16
   1   3  -6 34.9774 3.75607  15
  -3   1  -6 32.4745 3.42164  15
  -1  -3  -6 34.7808 3.69440  15
   6   1  -3 32.6870 3.34004  15
   6  -3  -1 31.7723 3.61624  15
   3  -1  -6 42.9995 3.98214  15
   6   3   1 39.3845 4.11200   7
   1   6   3 30.6786 4.51544   8
   3   1   6 32.0246 4.54106   8
   3   1   6 28.7367 3.77739   7
  -1   6  -3 31.0213 3.56932   7
   6  -1   3 27.2516 4.11190   8
   3   6  -1 27.5312 3.93470   7
  -3   6   1 34.1746 4.04541   7
  -1   6  -3 29.6955 3.19500  11
  -3   6   1 28.5164 3.04367   8
  -3  -1   6 36.4967 3.89420   8
   3   6  -1 22.4020 3.79270   8
   6   3   1 26.6995 4.20099   8
  -3  -6  -1 32.1642 2.93672   9
   1  -3   6 25.8360 3.43994   8
  -3  -6   3 21.8098 3.67426   5
  -6  -3  -3 24.3242 3.26173   4
  -6   3   3 25.9242 3.05285   5
  -3   3   6 28.3764 3.72208   5
  -6  -3   3 23.6243 3.85717   5
  -3  -3   6 31.7727 4.32642   5
  -6  -3  -3 32.0002 3.71315   5
  -3  -6  -3 31.1892 3.37189   5
   3   3  -6 34.0116 3.82911   1
  -3  -6   3 30.8399 3.99932   4
   3  -6  -3 31.0036 4.70264   3
  -6   3   3 35.0644 4.02147   2
   6   3  -3 31.8112 3.83780   1
  -3   3   6 34.3853 3.94193   2
  -3   6   3 25.9469 3.58564  27
  -6   3  -3 27.3003 4.50148  27
  -6   3   3 22.6161 3.39599  27
   6  -3  -3 31.7538 3.72418  29
   6  -3   3 33.2922 3.71789  28
  -6   3   3 29.9603 3.81049  13
   3  -6  -3 32.8505 3.66169  12
  -3  -3   6 29.0677 3.40513  13
  -3   3  -6 23.2460 3.35860  15
  -6  -3   3 25.4145 3.25814  12
  -3   3   6 35.9166 4.18912  13
  -3   6   3 27.3449 4.11661  13
  -6  -3   3 29.6073 3.48889  14
  -3   3  -6 28.8992 3.13294   6
  -3   6   3 34.0280 4.38504   6
   6   3   3 32.0519 4.19650   7
   3   6   3 31.0015 4.67523   7
  -6   3  -3 27.5390 3.15972   6
  -3   6  -3 27.9083 4.46111   6
  -6   3   3 32.7957 3.83357   6
  -3   6   3 29.6768 4.21562   7
   3   3   6 22.4565 4.00680   7
  -3   3   6 32.2778 3.64552   6
  -3  -3  -6 25.5965 4.53899  25
   3  -3  -6 32.4927 3.65531  25
   3  -3   6 28.5280 2.83928  26
  -3   6  -3 27.2932 3.58109  25
   3   6  -3 24.0086 3.71204  24
   6  -3  -3 22.4125 3.28197  24
  -3   3  -6 27.9378 4.50924  27
  -3   6  -3 28.0924 5.06616  27
  -3   3  -6 29.9889 4.47393  25
  -3   3  -6 24.9547 3.07735  22
   6   3  -3 30.8382 4.05758  24
   3  -3  -6 33.7160 4.34939  22
  -6  -3  -3 27.5620 4.86712  23
  -3  -6  -3 21.1614 4.08806  23
  -6  -3  -3 26.6421 3.50009  21
   6  -3  -3 32.4118 3.81391  22
  -3  -3  -6 37.7388 4.96593  21
  -3  -3   6 29.0495 3.27476  20
  -3  -6   3 26.5167 3.03184  20
   3  -3   6 26.7438 3.26434  20
   3  -6   3 34.8508 3.67138  20
  -3  -3  -6 32.4224 3.37892  19
   6  -3   3 34.3993 3.34909  20
   3  -6   3 24.5915 3.38796  16
   6  -3   3 26.4275 3.54954  17
  -6  -3  -3 29.2785 2.92235  19
   3  -3   6 31.4517 4.04209  17
  -3  -3   6 19.7039 3.10111  16
  -3   3  -6 31.9123 3.31679  19
   3   6  -3 33.3309 3.81223  15
   3   3  -6 31.4658 3.60648  15
  -3  -6   3 29.8686 3.80257  16
  -6  -3  -3 24.0604 2.58879  15
   3  -3  -6 43.2515 3.99331  15
  -3  -3  -6 28.9145 3.31662  15
   6   3  -3 27.2418 3.22533  15
   3  -6  -3 27.2740 4.01948  15
   6  -3  -3 36.2861 3.84847  15
   3   3   6 39.7227 5.09499   8
  -3   6  -3 28.6142 3.29426   7
   6   3   3 26.3480 4.46389   8
   6   3  -3 31.0469 3.67019   7
   3   6   3 29.8247 4.69652   8
  -6  -3  -3 30.4151 3.25787   9
  -3   3  -6 29.9290 3.28370   9
  -3   6  -3 22.8863 3.01298  11
  -3  -6  -3 29.7865 3.99617  12
  -6   3   3 32.8532 3.43731  11
  -6   3  -3 28.7089 3.31832  10
  -3   6   3 27.0822 3.41346   8
  -3   3   6 36.0174 3.88557   8
   3  -3   6 27.1636 3.47053   8
  -6  -3   3 22.7791 3.06853  10
  -4  -6   2 42.5187 4.40910   4
  -6  -4  -2 30.0051 4.04575   5
  -4   2   6 25.2082 4.06812   5
  -6   4   2 31.2607 3.30338   5
  -2  -4   6 36.5003 3.97649   4
  -4  -6   2 34.3391 4.26847   5
  -6  -4  -2 24.0495 3.72937   4
  -4  -2  -6 29.2987 3.07296   4
   4   2  -6 32.5601 3.97305   1
   6  -4   2 28.4618 4.02869   3
   2  -4  -6 41.4832 4.66516   3
  -6  -2   4 38.4648 3.97207   2
   6   4  -2 26.4183 3.93128   1
  -4   2   6 40.0780 4.19963   2
   4  -6  -2 46.3398 5.24664   3
  -2   6   4 27.0959 3.50887  27
  -6   2  -4 33.2777 4.83053  27
   6  -2  -4 50.5195 4.17444  28
  -6   4   2 27.8865 4.11565  27
  -4  -2  -6 23.2641 3.82493  27
   6  -4   2 28.0339 3.92324  28
  -4   6  -2 48.7813 5.62595  27
   6  -4   2 28.6195 4.03493  30
  -4   2   6 34.0445 4.40104  13
  -6  -2   4 40.4445 3.95079  14
  -4  -6   2 41.5287 3.82572  14
  -2   6   4 31.3747 4.71982  13
  -6   4   2 33.7012 4.14396  13
   2   4   6 35.0902 4.65637   7
  -2   6   4 31.0937 4.75665   7
  -4   2   6 27.5276 3.75804   6
  -6   2  -4 31.9135 3.20929   6
  -2   4  -6 38.6603 4.65693   6
  -4   6  -2 36.4664 4.88644   6
  -2   6   4 27.8142 4.50370   6
  -4   6  -2 36.4240 3.72873  25
   2   6  -4 19.0047 4.24224  24
  -4  -2  -6 21.1206 4.60870  25
   4  -2   6 28.9239 3.23933  26
   6  -2  -4 34.2881 4.02759  24
  -2   4  -6 38.4979 4.71359  25
  -2   4  -6 39.5805 5.06681  27
  -2  -6  -4 22.1719 4.58409  23
  -6  -4  -2 17.8737 4.67679  23
   6  -2  -4 49.6617 4.43933  22
   2  -4  -6 37.3990 5.32700  22
  -6  -4  -2 31.3726 3.98644  21
   6  -4   2 32.6312 3.78167  20
  -4  -6   2 39.3992 3.36377  20
  -2  -4   6 36.5116 3.75242  20
   2  -6   4 29.5969 3.78398  20
  -4  -2  -6 30.3216 4.67592  21
   4  -2   6 28.7838 3.54704  20
  -4   6  -2 35.9567 4.15276  18
  -4  -2  -6 29.6822 3.55439  19
  -2   4  -6 44.1066 3.83155  19
  -6  -4  -2 26.6934 3.13107  19
  -6   2  -4 40.4883 3.73679  19
   4  -2   6 25.2562 4.24474  17
   6  -4   2 22.2119 3.35740  16
  -2  -4   6 39.5201 3.88983  16
   4   2  -6 31.9571 3.87654  15
  -2   4  -6 48.0903 4.26272  15
   2   6  -4 29.6817 4.00263  15
  -2  -6  -4 22.8072 4.00876  15
   6  -2  -4 45.8156 4.08759  15
   2  -4  -6 42.4106 4.66143  15
  -4  -2  -6 24.9123 3.30055  15
   2  -6   4 22.1860 3.64614  16
   4   6   2 43.3076 5.09406   7
  -2   6   4 31.6352 4.21808   8
  -4   6  -2 41.3786 3.72069   7
   6   2   4 39.9549 4.39522   7
   6   4  -2 27.8609 4.09581   7
   6   2   4 46.8201 5.37856   8
   2   6  -4 25.1350 3.98442   7
   4   6   2 46.2355 5.29494   8
  -2   4  -6 44.3847 3.67144   9
  -6  -4  -2 26.8888 3.42996   9
  -6   2  -4 42.1370 3.79444   9
  -4   2   6 24.0011 3.58703  11
  -6   4   2 26.1992 3.71154  11
  -4   6  -2 32.2867 3.65494  11
   2   4   6 54.6087 5.76281   8
  -4   2   6 38.7702 4.18918   8
   4  -2   6 29.8994 4.03725   8
  -6   2  -4 43.2296 3.87683  10
  -6  -2   4 45.3833 3.69485  10
  -6   0  -4 15.5374 2.77101   5
  -6  -4   0 11.1962 2.50586   4
  -6   0   4 14.5609 2.73228   5
  -6   4   0 17.5653 2.21447   5
  -6  -4   0 10.8752 2.66196   5
  -4   0   6 26.2929 3.82187   5
  -4  -6   0 18.2901 2.68710   5
   0  -4  -6 22.7060 3.39138   3
  -6   0  -4 13.6449 1.94328   2
   4  -6   0 14.4303 3.86665   3
  -4   0   6 13.4207 2.51106   2
  -6   0   4 19.8368 2.70428   2
  -4   0  -6 14.5140 3.28396  27
   6   4   0 17.0021 2.43124  29
   6  -4   0 13.7250 2.71006  28
  -6   0  -4 11.9233 3.38995  27
  -6   4   0 16.0307 3.44428  27
   0   4  -6 19.0415 2.71740  15
   0   6  -4 18.6412 2.85283  15
  -4  -6   0 13.6678 3.01800  12
  -4   0   6 16.8221 2.69543  13
  -6   4   0 12.7691 2.12838  14
  -6   0   4 18.9924 2.79743  13
  -4   6   0 14.7666 2.12011  13
   4   6   0 18.5298 3.24119   7
  -4   6   0 11.0023 2.60226   7
   0   6   4 12.2708 3.48784   6
   0   4   6 12.3825 2.44756   6
   0   4   6 23.6349 3.50464   7
  -6   4   0 19.2314 2.88977   6
   0   6   4 18.4819 3.77879   7
  -4   6   0 10.0598 3.61321   6
  -4   0  -6 17.7349 3.84495  25
   0  -4  -6 12.3609 2.98764  25
  -4   6   0 21.6407 3.66776  27
   0  -4   6 15.0127 1.51673  26
   6   0  -4 15.5275 2.82969  24
  -4  -6   0 12.7427 3.35240  23
   4   0  -6 16.7968 2.97525  22
   6   0  -4 17.5525 2.67494  22
  -4  -6   0 15.2091 3.08913  21
  -6  -4   0 12.3302 3.38720  23
  -6   4   0 12.5932 1.95895  23
   4   0   6 14.7650 2.03844  20
   0  -6   4 17.2627 2.42961  20
  -4  -6   0 19.1603 1.87638  20
   0  -6  -4 18.3390 3.96980  21
   4   0  -6 18.3626 2.12162  19
   4  -6   0 10.3010 2.74689  21
   0  -4   6 17.4524 2.32389  20
  -6   4   0 17.9974 2.68732  18
  -6  -4   0 14.7846 1.42399  19
  -6   0  -4 17.2545 2.09414  19
  -4   6   0 18.2554 2.84836  18
   0   4  -6 16.0854 2.13677  19
  -4   0   6 17.9982 2.27099  17
   0  -6  -4 18.6612 3.06667  15
   4   0  -6 24.0158 2.81641  15
   4  -6   0 15.2480 2.45432  16
  -4   0  -6 16.2462 2.08872  15
   0  -6   4 18.0593 2.55888  16
   0  -4  -6 17.7485 2.80912  15
   6   0  -4 17.4994 2.41338  15
   4   0   6 16.3162 3.16504   8
   0  -4   6 18.0301 2.45891   8
   0   6  -4 12.8979 2.51937   7
   0   6   4 13.7429 3.41379   8
   6   0   4 11.0015 3.11994   8
   6   4   0 7.60956 2.56748   7
   4   6   0 17.3852 3.17469   8
   0  -6  -4 19.5553 2.89002  12
   0   6  -4 13.6730 1.68747  11
   6   4   0 12.4251 3.16340   8
  -4   6   0 18.0238 2.64740  11
  -4   0  -6 16.0730 2.37028   9
  -6   0  -4 18.1907 2.32055   9
  -6  -4   0 15.3506 2.45661  12
  -4   0   6 14.6469 2.02991  11
  -6  -4   2 35.6672 4.49494   5
  -6   2   4 27.7353 3.63340   5
  -2  -6   4 38.3265 4.28311   5
  -6  -2  -4 38.5874 4.34437   5
  -6  -4   2 34.5721 4.11250   4
  -4  -6  -2 22.2971 3.63418   5
  -2  -6   4 40.3373 4.33987   4
  -4  -6  -2 27.2600 4.32450   4
  -6   2   4 23.7668 4.02971   2
  -4  -2   6 34.4663 3.84377   2
   6   2  -4 31.6757 4.09560   1
  -4   6   2 27.2272 4.30341  27
  -4   2  -6 39.3551 4.82617  27
   6  -4  -2 40.1070 4.11681  29
  -6  -2  -4 21.2273 4.21139  27
   4  -2  -6 44.8775 3.91597  28
   6   4   2 40.7190 3.71359  29
   6  -4  -2 56.6738 4.56369  28
   6  -2   4 28.6464 3.63864  28
  -6  -4   2 42.6886 3.99655  14
   2  -6  -4 51.3070 4.45471  12
  -2   4   6 24.8175 4.75467  13
  -4   6   2 26.0295 3.97173  13
  -4  -2   6 48.8426 4.20189  13
  -6   4  -2 39.3621 3.62461  14
  -6  -4   2 32.7578 3.91013  12
  -6   2   4 31.2309 3.97949   6
  -6   4  -2 43.0886 4.13274   6
  -2   4   6 25.1527 3.99686   6
   2   6   4 34.7870 4.61065   6
   4   2   6 30.7301 4.18055   7
  -4   6   2 30.6105 4.65132   6
  -2   6  -4 36.9622 5.22013   6
  -4   6   2 28.7594 4.21697   7
   2   6   4 41.2446 5.21960   7
  -4   2  -6 32.1239 4.90815  25
  -2  -4  -6 22.2487 4.46382  25
   2  -4   6 25.0514 3.10321  26
   6   2  -4 37.6218 4.51934  24
  -2   6  -4 51.9709 6.36520  27
   6  -2   4 25.7121 3.36186  26
   6  -4  -2 35.5387 4.20827  22
  -4   2  -6 35.5125 3.45567  22
   4  -2  -6 43.5674 4.63185  22
  -6  -2  -4 27.6316 3.61246  21
  -4  -6  -2 26.2370 4.55034  21
   4   6  -2 27.1136 4.04275  24
  -4  -6  -2 21.6203 4.59704  23
   4  -6   2 29.4624 3.92068  20
   6  -2   4 29.5292 3.50692  20
   4   2   6 38.3274 3.52488  20
   2  -4   6 29.3310 3.67008  20
  -4  -2   6 44.1304 3.87081  20
  -2  -6   4 44.7861 3.77263  20
  -4  -2   6 35.3432 3.49522  16
  -2  -6   4 43.9049 4.17341  16
   2   4  -6 32.6710 3.44632  19
   4  -6   2 30.2432 3.76799  16
  -4   2  -6 46.7744 3.88885  19
  -6  -2  -4 27.1240 3.35300  19
   6  -2   4 25.8151 3.90574  17
  -4   2  -6 38.6859 3.77267  15
   4   6  -2 27.8932 3.84258  15
   2   4  -6 29.7325 3.99359  15
   6   2  -4 37.5216 3.78766  15
   4  -2  -6 51.2651 4.49782  15
   2  -6  -4 39.1557 4.68428  15
   6  -4  -2 40.5691 4.25376  15
  -2  -4  -6 23.8564 3.76855  15
   6   4   2 42.9345 4.60222   7
  -2   4   6 28.8400 4.31169   8
  -2   6  -4 37.7202 3.73764   7
   6   4   2 45.5009 5.23079   8
   2   6   4 32.3311 5.05277   8
   4   2   6 44.4234 5.29476   8
   4   6  -2 22.9444 4.02915   7
  -2   6  -4 36.0966 3.31496  11
  -4  -6  -2 29.9280 3.26169   9
  -6  -2  -4 28.1335 3.62717   9
  -4   6   2 25.8205 3.39231   8
  -6   2   4 22.4072 3.55446  11
  -4   2  -6 46.9902 3.93305   9
  -4   4   6 16.7570 2.07673   5
  -6  -4   4 13.3628 3.32877   5
  -6  -4  -4 17.1163 2.49498   4
  -4  -4   6 13.7606 3.18964   5
  -6   4   4 19.9874 1.91134   5
  -6  -4  -4 16.0632 2.81897   5
  -4  -6   4 9.82373 2.89401   5
  -4  -6  -4 12.5221 2.38588   5
  -4   4   6 19.4112 3.24025   2
   4  -6  -4 6.58455 3.43351   3
  -4  -6   4 8.91476 2.51128   4
  -6   4   4 17.4301 3.42727   2
   6   4  -4 16.5463 2.99669   1
   4   4  -6 15.9812 3.09182   1
  -6   4   4 12.5238 2.43157  27
  -6   4  -4 6.69279 3.44266  27
   6  -4  -4 8.88928 2.52647  29
   6  -4   4 14.9491 2.67042  28
   6  -4  -4 15.6077 2.84167  28
  -4   4  -6 13.8791 3.92692  27
  -4   6   4 13.4279 3.33047  13
  -4   4  -6 7.60356 2.26859  15
   6   4  -4 16.5412 2.41570  15
   4   6  -4 19.6176 2.83442  15
  -6   4   4 23.2919 3.30522  13
  -6  -4   4 10.5310 2.27030  14
  -4   6  -4 8.49694 3.34368   6
   4   4   6 5.85968 3.07897   7
   4   6   4 12.1285 3.89035   7
  -6   4   4 19.5499 3.25184   6
  -6   4  -4 9.15614 2.03976   6
   4   6   4 7.85131 2.89330   6
  -4   6   4 24.4502 3.58051   7
  -4   4   6 17.2771 2.86149   6
   6   4   4 13.7358 3.30939   7
  -4   6   4 12.8556 3.33012   6
  -4   4  -6 6.39414 1.94063   6
   4   4  -6 14.9549 3.96378  24
   4  -4   6 15.4795 1.80573  26
  -4   4  -6 10.3066 3.86411  25
  -6   4  -4 6.47378 3.07836  25
   4   6  -4 14.9817 3.41196  24
  -4   6  -4 9.54344 3.04006  25
  -4   6  -4 3.93487 3.86848  27
  -4   4  -6 8.56075 1.74498  22
  -6  -4  -4 17.2517 3.06888  21
   4  -4  -6 3.89695 3.30862  22
  -6  -4  -4 13.0742 4.82904  23
   6  -4  -4 10.3706 3.20153  22
  -4  -6  -4 16.2040 4.29818  23
   4  -4   6 12.8537 2.31394  20
  -6  -4   4 10.3465 1.90095  20
  -4  -4  -6 21.7410 4.24240  21
  -4  -4   6 8.93213 2.15249  20
   4  -6   4 16.4870 2.52148  20
  -4  -6   4 7.09039 1.79809  20
   6  -4   4 19.6408 2.45180  20
  -4  -6  -4 15.9923 4.06089  21
  -6  -4  -4 18.6652 2.02923  19
  -4   4  -6 12.5087 2.29968  19
  -4  -4  -6 17.8372 2.47191  19
  -4  -4  -6 16.3313 2.25529  15
  -4  -6   4 6.26766 2.51469  16
  -4  -4   6 16.3248 2.43311  16
   4  -6   4 12.3526 2.48768  16
  -4  -6  -4 13.3610 2.83640  15
   6  -4  -4 14.9939 2.96836  15
   4  -6  -4 7.84163 2.95767  15
  -6  -4  -4 12.6590 1.73675  15
   4  -4  -6 11.8475 2.89583  15
   4   4  -6 25.1121 2.85628  15
   4   4   6 9.19264 4.08164   8
  -4   6   4 15.4006 2.52318   8
   6   4   4 9.70846 3.92226   8
  -4   4   6 19.2710 3.01438   8
   6   4  -4 18.3189 3.00479   7
  -6  -4  -4 22.9910 2.44776   9
  -6   4  -4 12.5321 2.20892  10
  -4   4  -6 11.9177 2.07445   9
  -6   4   4 20.5179 2.62374  11
  -4  -6  -4 15.4958 2.21115   9
  -6  -5  -3 62.2936 6.39220   4
  -3  -5   6 58.3259 6.19346   4
  -6  -5  -3 60.3383 6.41386   5
  -5   3   6 63.6844 6.07497   5
  -5  -6   3 51.4406 6.36326   4
  -3  -5   6 66.3478 6.85921   5
  -5  -3  -6 61.0604 5.67106   4
  -5  -6   3 51.3163 6.60585   5
  -6   5   3 63.9453 5.49047   5
   5   3  -6 63.1734 6.66044   1
   3  -5  -6 64.4581 6.98221   3
   5  -6  -3 70.3259 7.28533   3
  -5   3   6 79.6234 6.81128   2
  -6   5   3 47.9043 6.17584  27
   5   6   3 59.4627 5.52198  29
  -6   3  -5 57.4046 7.30649  27
   6  -5   3 60.3854 6.56711  28
  -3   5  -6 59.1853 7.66639  27
   6  -3  -5 77.6549 6.50416  28
  -5  -3  -6 43.3278 6.20297  27
  -6  -3   5 55.8353 6.11932  14
  -3   6   5 56.7276 6.96163  13
  -5  -6   3 64.5605 6.08916  14
  -6   5   3 62.5441 6.61105  13
  -5   3   6 66.6880 6.45185   6
  -3   5  -6 70.2845 6.93693   6
  -6   3  -5 48.1902 5.48010   6
  -6   5   3 70.6130 6.87058   6
  -3   6   5 62.9268 6.94019   6
  -5   6  -3 60.9733 6.84661   6
  -5   6  -3 49.5317 6.08186  25
  -3   5  -6 53.1181 7.09988  25
   5  -3   6 62.8206 5.68921  26
   3   6  -5 46.4820 6.98166  24
   6  -3  -5 55.2357 6.26691  24
   6   5  -3 77.0285 7.07654  24
  -6   3  -5 47.6483 6.97883  25
   5   3  -6 50.5822 7.03807  24
  -5  -3  -6 60.8399 7.11641  21
  -6  -5  -3 61.4010 6.83894  21
  -3  -6  -5 60.8730 7.77897  21
   6  -3  -5 68.1880 6.75636  22
  -6  -5  -3 51.1319 7.36012  23
   5  -3   6 58.0632 5.98015  20
  -6  -5  -3 58.7307 5.68712  19
  -5  -6   3 60.7111 5.66379  20
  -6  -3   5 59.1666 5.96242  20
  -3  -5   6 54.7391 5.92884  20
   6  -5   3 54.6857 6.12235  20
   3  -6   5 65.2175 6.24445  20
   5  -3   6 54.9659 6.58381  17
   3  -6   5 53.7160 6.15359  16
   6  -5   3 54.2992 5.92619  16
  -5  -3  -6 59.6224 6.01510  19
  -3  -5   6 57.9688 6.14059  16
  -6   3  -5 61.7193 6.06356  19
  -3   5  -6 63.7404 6.09443  19
  -6  -3   5 79.2342 6.26925  16
  -3   5  -6 61.9063 6.42275  15
   6  -3  -5 80.9930 6.74359  15
   6   5  -3 61.5079 6.10758  15
   3   6  -5 54.7309 6.35077  15
   5  -6  -3 52.0055 6.65514  15
   5   3  -6 64.6188 6.27463  15
  -5  -3  -6 50.0121 5.61516  15
  -3  -6  -5 55.8635 6.36688  15
  -6  -5  -3 44.5137 5.70729  15
   3  -5  -6 63.0515 6.88223  15
   3   5   6 57.4758 7.06413   7
   5   6   3 60.0666 7.11850   7
  -3   5  -6 55.0596 5.69122   7
   6   3   5 52.5500 7.44285   8
   6   3   5 43.5929 6.48745   7
   6   5  -3 55.2128 6.49324   7
  -3   6   5 73.1646 7.25869   7
   3   6  -5 56.4993 6.48649   7
  -3   5  -6 67.4063 5.61478  10
  -3   5  -6 64.2175 5.91471   9
  -5   3   6 59.6169 6.12500  11
  -5  -3  -6 62.2548 6.24354   9
  -6   3  -5 52.4955 5.97135   9
  -6   5   3 70.1633 6.46990  11
  -5   3   6 79.9665 6.63656   8
   3   5   6 58.5459 7.66267   8
  -3   6   5 58.4395 6.44692   8
  -6  -5  -3 71.9422 5.97275   9
  -6   3  -5 62.8007 6.07629  10
  -6  -5  -1 42.8961 4.87216   4
  -5   1   6 44.9760 5.03968   5
  -5  -6   1 35.3656 4.72072   4
  -6  -1   5 45.7970 5.29722   5
  -1  -5   6 35.0621 4.40756   4
  -5  -6   1 40.3335 4.82964   5
  -6  -5  -1 33.9125 4.66056   5
  -6  -1   5 45.0362 4.67669   2
   5   1  -6 44.9469 4.97736   1
  -5   1   6 36.8320 4.62814   2
   6  -5   1 44.4230 5.07151   3
   1  -5  -6 37.2852 5.28994   3
   5  -6  -1 35.6971 5.41949   3
  -1   6   5 42.2533 4.01875  27
  -5  -1  -6 38.9080 5.03668  27
  -6   5   1 28.1069 5.00939  27
  -5   6  -1 41.5576 5.73747  27
   6  -5   1 41.6266 5.00548  28
   6  -1  -5 37.0165 4.41633  28
  -6   1  -5 29.8226 5.30088  27
  -6  -5  -1 39.7040 4.74547  12
  -6  -1   5 48.1432 4.99487  13
  -5   1   6 53.0676 5.14761  13
  -5   6  -1 31.5797 3.83054  14
  -1   6   5 37.4330 5.65459  13
  -5  -6   1 34.8598 5.03713  12
  -6   5   1 41.8555 5.21851   6
   5   6   1 35.3017 5.21655   7
  -5   6  -1 40.7242 5.25086   6
   1   5   6 37.8903 5.34373   7
  -1   6   5 31.8877 4.94414   6
   6   5  -1 54.9488 5.24180  24
   5   1  -6 40.3399 5.35816  24
  -1   5  -6 40.5383 6.33327  27
   6  -1  -5 28.9095 4.87209  24
   5  -1   6 41.4645 4.05852  26
  -5  -1  -6 48.9968 5.06525  21
  -6  -5  -1 31.2351 5.51121  23
   6  -1  -5 42.2233 4.88531  22
   5   1  -6 48.2706 4.99666  22
  -5  -6   1 39.9753 5.59409  23
  -6  -5  -1 49.8911 5.06969  21
  -5  -6   1 35.0077 3.78329  20
  -1  -5   6 35.6917 4.31098  20
   5  -1   6 35.4947 4.15372  20
  -1  -6  -5 44.8637 6.14609  21
   6  -5   1 48.3019 4.74988  20
  -6  -5  -1 43.1292 3.80137  19
  -6   1  -5 44.0392 4.29525  19
  -1  -5   6 32.2141 4.37388  16
  -5   1   6 40.0815 3.99077  17
   5  -1   6 35.6316 4.94611  17
  -1   5  -6 41.2884 4.29487  19
  -5  -1  -6 43.9160 4.31821  19
   1  -6   5 39.0541 4.57708  16
  -6  -1   5 52.4349 4.05796  16
  -6   5   1 42.1267 4.98648  18
   5   1  -6 53.3636 4.83615  15
  -5  -1  -6 42.9841 3.99723  15
   1   6  -5 48.0534 4.90176  15
  -6   1  -5 41.1872 4.00090  15
   6  -1  -5 49.0542 4.81128  15
  -1  -6  -5 35.8358 4.86052  15
   1   5   6 40.3636 5.57585   8
  -1   5  -6 35.8540 4.22111   7
   6   5  -1 37.7755 4.98597   7
   5  -1   6 32.6225 4.88362   8
   6   1   5 33.2223 5.47213   8
   1   6  -5 40.3285 4.65482   7
  -5   1   6 42.1367 4.26684  11
  -5  -1  -6 48.0679 4.64131   9
  -5   6  -1 34.0044 4.37758  11
  -6   1  -5 35.9709 4.29336   9
  -1   6   5 48.7436 5.39475   8
  -6   1   5 43.7729 4.77345   5
  -6  -5   1 31.6682 4.78553   5
  -1  -6   5 37.8987 4.59987   4
  -5  -1   6 43.4302 5.57692   5
  -5  -6  -1 37.1788 4.55744   5
  -6  -1  -5 48.1477 5.04458   5
  -5  -6  -1 39.0862 4.97099   4
  -6   1   5 39.2072 4.71813   2
  -6  -1  -5 36.6607 3.80545   2
  -5  -1   6 36.0945 4.56914   2
   5  -6   1 39.6029 5.26951   3
   6   1  -5 53.7211 5.14809   1
   1  -6  -5 42.1517 5.54979   3
   6  -5  -1 41.2939 5.26109   3
   6  -5  -1 38.0069 4.85074  28
  -6   5  -1 41.7421 5.51101  27
   5  -1  -6 42.7536 4.41848  28
   6   5   1 37.5830 4.18575  29
   6  -5  -1 35.2038 4.42946  29
   5  -6   1 40.0174 5.03007  30
  -6  -1  -5 39.7038 5.22482  27
  -5   6   1 42.3019 5.29671  27
  -5   1  -6 33.7562 5.14217  27
  -6   5  -1 29.7836 3.95524  14
  -5  -1   6 48.5748 4.84509  13
  -6  -5   1 27.7909 4.56654  12
  -6   1   5 45.9276 5.03974  13
  -5   6   1 40.7896 4.42110  13
  -6  -5   1 38.6324 4.56752  14
  -5  -6  -1 36.1204 4.84878  12
   1   6   5 34.4851 5.46751   7
  -1   5   6 43.1055 5.56205   7
  -6   5  -1 46.3040 5.02518   6
  -1   5   6 32.3245 4.60994   6
   1   6   5 39.8266 5.16894   6
   5   6  -1 57.6404 5.03608  24
   6  -1   5 43.5367 4.09428  26
   6   1  -5 51.8016 5.31554  24
  -5   1  -6 29.5044 5.39695  25
   5  -1  -6 38.2943 4.82318  22
  -6  -1  -5 40.3430 4.18164  21
  -6   5  -1 33.8407 4.04236  23
  -5  -6  -1 36.2768 5.51876  23
  -5   1  -6 50.2797 4.36505  21
  -6  -5   1 30.8653 5.60898  23
  -5  -6  -1 43.2716 5.37004  21
   1  -5   6 46.3640 4.48693  20
  -5  -6  -1 41.2765 3.72098  20
   5  -6   1 39.1767 4.66827  20
  -1  -6   5 37.2373 4.28521  20
   6  -1   5 42.3641 4.13128  20
   1  -5   6 33.5524 4.38500  16
  -6   5  -1 37.9997 4.74056  18
  -5   1  -6 42.5998 4.34200  19
   1   5  -6 45.5368 4.20481  19
   6  -1   5 33.8069 4.73449  17
  -5  -1   6 36.1307 3.88076  16
  -1  -6   5 40.9571 4.55248  16
  -6  -1  -5 42.6276 4.19973  19
   5  -6   1 45.7153 4.49706  16
  -6  -1  -5 42.1625 3.72025  15
  -5   1  -6 41.8918 4.11876  15
   6  -5  -1 34.6180 4.80924  15
  -1  -5  -6 43.1936 4.88018  15
   5  -1  -6 45.3953 4.75650  15
   6   1  -5 50.3458 4.62214  15
   1   5  -6 39.4922 4.75196  15
   6   5   1 46.1710 5.24336   7
   6  -1   5 35.4999 5.05389   8
  -1   5   6 35.6917 5.22779   8
   5   6  -1 42.3835 5.06259   7
   1   6   5 32.7144 5.45231   8
   5   1   6 32.4041 5.36349   8
  -1   6  -5 38.0113 4.30507   7
  -6   1   5 41.1043 4.29952  11
   6   5   1 40.5437 5.56063   8
  -5   1  -6 40.4637 4.41905   9
  -6   5  -1 36.0571 4.32096  11
   5   6  -1 36.4001 5.13229   8
  -5  -6  -3 52.2345 6.59678   4
  -6  -3  -5 72.7861 6.85766   5
  -6   3   5 63.6906 6.03472   5
  -3  -6   5 62.8795 6.68066   5
  -5  -6  -3 58.4259 6.31243   5
  -6  -5   3 67.0393 7.03854   5
  -6  -5   3 45.3320 6.31315   4
  -6  -3  -5 54.6748 5.80718   4
  -3  -6   5 68.0804 6.54841   4
   3  -6  -5 58.2714 7.22284   3
  -6   3   5 71.7413 6.89361   2
   6   3  -5 61.2522 6.75836   1
  -6   5  -3 58.6684 7.65312  27
  -5   6   3 45.5773 6.26980  27
   6  -5  -3 60.8806 6.30544  29
   5  -3  -6 75.8051 6.46880  28
  -5   3  -6 54.1193 7.28474  27
   6   5   3 67.1961 5.87973  29
  -3   6  -5 72.2686 8.09432  27
  -5   6   3 63.5068 6.76380  13
  -3   5   6 57.7152 7.17993  13
  -6   3   5 67.8189 6.80282  13
  -6  -5   3 63.0873 6.22630  14
  -3   6  -5 51.6269 7.26850   6
  -6   3   5 72.9656 6.63394   6
  -3   5   6 58.3780 6.65564   6
  -5   6   3 67.3343 7.12902   6
  -6   5  -3 52.7774 6.25286   6
   5   6  -3 67.0753 6.92165  24
  -3   6  -5 57.5298 7.00766  25
   6  -3   5 61.6539 5.83244  26
  -5   3  -6 52.3334 7.30433  25
   6   3  -5 66.7678 7.10002  24
  -5  -6  -3 69.8432 7.40653  21
  -3  -5  -6 73.0227 8.21084  21
  -5  -6  -3 32.7889 6.92170  23
  -6  -3  -5 63.5298 6.71406  21
   5  -3  -6 72.9370 7.09075  22
  -6  -5   3 60.6555 5.73973  20
   3  -5   6 61.9607 6.22618  20
   6  -3   5 63.7191 6.10562  20
  -3  -6   5 55.6293 5.95951  20
  -5  -3   6 55.2208 6.07123  20
   5  -6   3 61.4238 6.37098  20
   6  -3   5 51.6278 6.53566  17
   3  -5   6 45.0308 6.06636  16
  -6  -3  -5 65.6330 6.01875  19
  -3  -6   5 60.9805 6.34402  16
   5  -6   3 55.3619 6.15722  16
  -5  -3   6 69.8854 6.06117  16
   6  -5  -3 67.7433 6.79096  15
   3   5  -6 58.0264 6.35696  15
  -5   3  -6 60.8821 6.13613  15
  -3   6  -5 61.0631 6.72295  15
  -3  -5  -6 54.9916 6.34057  15
   3  -6  -5 48.0410 6.72254  15
   6   3  -5 66.2271 6.30161  15
   5   6  -3 55.8300 6.29595  15
   5  -3  -6 77.6114 6.81692  15
   3   6   5 67.8525 7.55460   7
   5   3   6 48.2386 6.60701   7
   3   5  -6 52.8768 6.45665   7
  -3   6  -5 60.9587 5.84752   7
   6   5   3 62.6289 6.99706   7
   5   6  -3 53.4252 6.63818   7
   5   3   6 69.7853 7.70975   8
  -5  -6  -3 65.8873 5.90266   9
  -5   3  -6 61.5330 6.13841   9
   3   6   5 58.5160 7.52720   8
  -3   5   6 63.5045 6.77213   8
   6   5   3 53.3460 7.35183   8
  -6  -3  -5 64.6332 6.26644   9
  -5   6   3 63.7883 6.67844  11
  -6   3   5 59.8705 6.23155  11
  -6  -5  -5 279.094 24.1163   5
  -5  -6  -5 247.459 24.1301   4
  -6  -5   5 287.214 24.6932   5
  -5  -6   5 224.117 23.8521   4
  -5  -6  -5 292.470 23.9799   5
  -5  -5   6 286.294 24.6697   5
  -5  -6   5 275.805 24.4525   5
  -5  -5  -6 247.961 23.8482   4
  -5  -5  -6 339.941 24.3399   5
  -6  -5  -5 260.575 23.8234   4
   5   5  -6 259.311 24.1131   1
   5  -5  -6 305.933 24.6444   3
  -6   5   5 418.044 25.2129   2
   6   5  -5 211.785 23.9442   1
  -5   6  -5 275.705 25.2329  27
  -5   5  -6 273.439 24.9767  27
  -6   5  -5 270.014 25.1402  27
   6  -5  -5 437.205 24.9063  28
  -5  -5   6 250.972 23.5394  14
  -6  -5   5 251.987 23.6226  14
  -5   6   5 314.426 24.7788  13
  -6   5   5 440.381 25.5859  13
  -5   5   6 309.102 24.7728  13
  -6   5  -5 258.882 23.5273   6
  -5   6   5 287.216 24.4886   6
  -5   6  -5 251.223 23.9423   6
  -5   5   6 271.468 24.2320   6
  -6   5  -5 234.029 24.2242  25
  -5   6  -5 229.365 24.2550  25
  -5   5  -6 235.239 24.5593  25
   5   6  -5 250.586 24.5611  24
   5  -5   6 255.152 23.3041  26
   6   5  -5 259.372 24.6067  24
   5   5  -6 217.503 24.4820  24
   6  -5  -5 415.842 25.0994  22
  -6  -5  -5 221.335 25.1212  23
  -5  -6  -5 230.916 24.8799  23
   5  -5  -6 271.103 24.5549  22
  -6  -5  -5 257.416 24.5834  21
  -5  -5  -6 287.913 25.1713  21
  -5  -6  -5 245.618 24.8865  21
   5  -6   5 266.492 23.8722  20
  -5  -5   6 246.006 23.5075  20
  -5  -5  -6 241.239 23.6367  19
   6  -5   5 263.731 23.7696  20
  -6  -5   5 258.320 23.4651  20
  -5  -6   5 246.052 23.4213  20
  -5  -6  -5 203.819 23.4811  19
   5  -5   6 261.315 23.7833  20
  -6  -5   5 344.934 24.3198  16
  -6  -5  -5 245.791 23.5067  19
  -5  -5   6 281.523 23.8302  16
  -5   5  -6 267.704 23.7570  19
   5  -6   5 217.157 23.5911  16
  -5  -6   5 329.385 24.2683  16
   6  -5   5 197.852 23.4755  16
   5   5  -6 274.998 23.9150  15
  -5  -6  -5 222.890 23.5915  15
   6   5  -5 260.602 23.8209  15
   5  -5  -6 266.286 24.2696  15
   5   6  -5 272.010 23.9274  15
  -5  -5  -6 202.797 23.3568  15
   5  -6  -5 243.109 24.2890  15
  -5   5   6 315.344 24.1601   8
  -5  -5  -6 271.019 23.8250   9
  -5  -6  -5 258.568 23.6269   9
  -6  -5  -5 299.349 23.7934   9
   5   6   5 274.997 25.0933   8
  -5   5  -6 269.601 23.6299   9
   5   5   6 265.564 25.0848   8
  -5   5  -6 266.555 23.4554  10
   6   5   5 272.706 25.1337   8
  -5   5   6 289.034 24.1892  11
  -5   6   5 287.919 24.3860  11
  -6   5   5 371.093 24.5651  11
  -5   6   5 280.494 23.8742   8
  -6   5  -5 239.267 23.5115  10
  -5   6  -5 234.009 23.3976  10
   6   5   5 251.608 24.4211   7
   5   5   6 249.531 24.4717   7
   5   6   5 254.058 24.5829   7
   6   5  -5 234.816 24.1059   7
   5   6  -5 240.329 24.0860   7
   5   5  -6 257.079 24.1204   7
  -6   0   6 139.245 12.7226   2
   6  -6   0 146.320 13.3514   3
  -6   0  -6 117.215 13.0886  27
   6  -6   0 158.150 13.2031  28
  -6   6   0 145.121 13.4831  27
  -6   0   6 166.715 13.1377  13
  -6   6   0 118.560 12.1263  14
  -6  -6   0 105.724 12.7130  12
   0   6   6 132.886 12.8970   6
  -6   6   0 144.639 13.2149   6
   6   0   6 139.839 12.2384  26
   6   0  -6 113.170 13.0342  24
   6   0  -6 137.907 12.9254  22
  -6  -6   0 112.685 13.5795  23
   6   6   0 126.230 13.0032   7
   0   6  -6 123.606 12.4174   7
   0   6   6 141.666 13.4495   7
  -6   6   0 136.452 13.0011  18
  -6   0  -6 146.411 12.4430  19
   0   6  -6 134.178 12.3169  19
   0  -6  -6 126.927 12.9818  15
  -6   0  -6 139.102 12.0349  15
   0   6  -6 150.194 12.9215  15
   6   0  -6 161.329 12.8306  15
  -6   0   6 137.217 13.1965   5
  -6  -6   0 125.011 12.8102   4
  -6  -6   0 123.306 12.7807   5
  -6   0  -6 145.445 12.6055   9
  -6   6   0 123.469 12.5276  11
   0   6   6 144.749 13.4672   8
   6   0   6 111.805 13.1282   8
  -6  -6   2 891.992 90.2612   4
  -2  -6   6 944.496 90.3652   5
  -6  -6  -2 903.693 90.1518   5
  -6   2   6 997.715 90.1808   5
  -6  -6   2 942.010 90.4791   5
  -2  -6   6 945.438 90.1140   4
  -6  -6  -2 1010.39 90.4462   4
  -6  -2   6 1190.41 91.1382   5
  -6   2   6 1175.55 90.4701   2
  -6  -2   6 1109.22 90.2205   2
   6  -6   2 940.400 90.3604   3
   2  -6  -6 1053.71 90.7082   3
   6  -6  -2 1071.19 90.7575   3
  -6   6   2 952.161 90.3487  27
  -6   2  -6 885.615 90.6166  27
   6  -6  -2 1039.76 90.5282  28
   6   6   2 1037.66 89.7004  29
  -6  -2  -6 896.106 90.3480  27
   6  -6  -2 1042.95 90.0996  29
  -6   6  -2 1111.95 91.2944  27
   6  -6   2 1012.57 90.5144  30
   6  -2  -6 1151.46 90.1763  28
  -2   6  -6 1148.76 91.7257  27
  -2   6   6 940.026 90.8574  13
  -6  -6   2 940.299 90.4865  12
  -6  -6   2 1026.99 90.1182  14
  -6   6   2 1077.06 90.3424  13
  -6   2   6 1260.00 90.7426  13
  -2   6  -6 993.493 90.9116   6
  -6   2   6 1055.95 90.2373   6
  -6   6  -2 1061.13 90.4851   6
  -2   6   6 1016.36 90.4918   6
  -6   2  -6 798.407 90.6443  25
  -2   6  -6 986.072 90.6832  25
   6   2  -6 1067.41 90.8861  24
   6   6  -2 1285.60 90.8684  24
   6  -2   6 1076.86 89.7890  26
  -6  -6  -2 724.129 90.6876  23
  -2  -6  -6 1194.21 91.7096  21
  -6  -6  -2 1003.81 90.6878  21
   6  -2  -6 1021.79 90.4314  22
  -6  -2  -6 1156.53 90.4555  21
   6  -6   2 1152.59 90.4365  20
  -6  -6  -2 952.455 89.6636  19
   2  -6   6 1084.03 90.2066  20
  -2  -6   6 1023.19 89.9989  20
   6  -2   6 1093.39 89.9617  20
   6  -2   6 895.439 90.3547  17
   2  -6   6 948.467 90.0860  16
   6  -6   2 1051.67 90.0636  16
  -2   6  -6 1004.93 90.0181  19
  -6   2  -6 1079.29 90.0693  19
  -6  -2   6 1437.45 90.0232  16
  -2  -6   6 978.259 90.1242  16
  -6  -2  -6 1173.31 90.0756  19
   6   2  -6 1425.07 90.4268  15
  -2  -6  -6 1012.63 90.3902  15
   2   6  -6 1080.36 90.3897  15
   6  -6  -2 931.280 90.3887  15
  -2   6  -6 1076.39 90.4471  15
   6  -2  -6 1306.60 90.5466  15
   2  -6  -6 1006.37 90.5963  15
  -6   2  -6 1064.23 89.8543  15
   2   6   6 1004.08 90.8806   7
   6   6  -2 994.772 90.5004   7
  -2   6  -6 885.138 89.8027   7
   6   6   2 1027.59 90.7130   7
   2   6  -6 957.105 90.2097   7
   2   6   6 1120.52 91.1879   8
   6   2   6 885.035 90.7273   8
   6   6   2 878.913 90.7823   8
  -6   2   6 1099.56 90.0659  11
  -6  -2  -6 1180.72 90.3087   9
  -2   6   6 1059.55 90.5073   8
  -6   6  -2 946.082 90.0148  11
  -6   2  -6 1076.51 90.1250   9
  -6   6   2 989.231 90.3152  11
  -6  -6  -2 993.781 89.7083   9
  -4  -6   6 78.3218 8.63146   5
  -6  -4   6 95.9974 9.35369   5
  -4  -6   6 69.5370 8.12872   4
  -6  -6   4 89.5754 8.97531   5
  -6  -6   4 70.3582 8.28312   4
  -6  -6  -4 75.0060 8.15469   5
  -6  -4  -6 104.862 8.83140   5
  -6  -6  -4 76.6991 8.51718   4
   4  -6  -6 78.7887 9.14154   3
   6  -6  -4 79.0549 8.96933   3
  -6   4   6 95.5966 8.93539   2
   6   4  -6 84.0098 8.56215   1
  -6   6  -4 95.9038 10.0444  27
  -6   6   4 62.7611 7.86165  27
   6  -4  -6 96.0949 8.46792  28
  -6   4  -6 68.6268 9.12310  27
  -4   6  -6 74.9671 9.76835  27
  -6  -6   4 88.1316 8.04600  14
  -4   6   6 95.7100 9.31092  13
  -6  -4   6 81.5224 8.00550  14
  -6   4   6 109.258 9.15327  13
  -6   6   4 93.0066 8.80322  13
  -4   6  -6 84.1639 8.72202   6
  -6   6  -4 84.5193 8.35286   6
  -6   6   4 92.7211 8.97081   6
  -4   6   6 84.0051 8.81240   6
  -6   4   6 91.0874 8.56609   6
  -4   6  -6 69.8447 9.09723  25
  -6   6  -4 57.6633 8.15036  25
  -6   4  -6 70.8209 9.05703  25
   6  -4   6 85.2337 7.65350  26
   6   6  -4 88.1630 9.09422  24
   4   6  -6 74.8671 9.11423  24
  -6  -6  -4 74.9867 8.97209  21
   6  -4  -6 95.8187 9.03179  22
  -4  -6  -6 79.4047 9.73245  21
  -6  -6  -4 64.5449 9.32069  23
  -6  -4  -6 94.0578 9.19123  21
   6  -4   6 85.0523 8.05978  20
  -6  -6   4 73.0640 7.59486  20
  -6  -4   6 71.0074 7.83701  20
  -4  -6   6 72.2130 7.77681  20
  -6  -6  -4 75.1481 7.75207  19
   6  -6   4 82.8918 8.24061  20
   4  -6   6 84.6732 8.16619  20
   6  -4   6 79.1038 8.59893  17
  -4  -6   6 80.0693 8.13447  16
  -6  -4   6 106.985 8.30793  16
   6  -6   4 75.2859 7.98783  16
   4  -6   6 66.5971 7.96205  16
  -6  -4  -6 87.9305 7.98563  19
   6   4  -6 87.9896 8.26974  15
   4   6  -6 75.3911 8.27721  15
  -6  -6  -4 65.0834 7.75788  15
   6  -6  -4 83.5932 8.78264  15
  -4   6  -6 80.8719 8.45314  15
   6  -4  -6 94.4369 8.73044  15
  -4  -6  -6 70.5849 8.09124  15
   4  -6  -6 81.9690 8.89228  15
   6   6  -4 86.3685 8.29388  15
   6   6  -4 74.2936 8.64649   7
   6   6   4 73.2090 8.98014   7
   4   6  -6 89.0032 8.65244   7
   4   6   6 74.0088 9.08944   7
   6   4   6 74.3126 8.73744   7
   6   4   6 88.6401 9.64830   8
  -6  -6  -4 99.9769 7.98978   9
  -6   4  -6 86.2700 7.97090  10
  -6  -4  -6 94.9845 8.28210   9
  -6   4  -6 77.3386 7.97989   9
   6   6   4 83.2798 9.45449   8
  -6   4   6 91.1235 8.28739  11
  -6   6   4 85.1161 8.49835  11
  -4   6   6 81.2123 8.35267   8
  -6  -6   6 528.208 40.7800   5
  -6  -6  -6 511.718 40.2069   5
  -6  -6  -6 398.764 39.8592   4
  -6   6  -6 494.217 41.4800  27
  -6   6   6 547.042 40.8953  13
  -6   6   6 432.099 40.2793   6
  -6   6  -6 377.860 40.3811  25
   6   6  -6 405.820 40.6699  24
  -6  -6  -6 446.915 41.0230  21
  -6  -6  -6 401.069 41.2093  23
   6  -6   6 443.243 39.7956  20
  -6  -6  -6 404.462 39.5649  19
  -6  -6   6 444.941 39.4791  20
   6  -6   6 340.599 39.4863  16
  -6  -6   6 597.580 40.3688  16
   6   6  -6 433.762 39.8855  15
   6  -6  -6 446.033 40.3747  15
   6   6   6 442.947 40.6291   7
   6   6  -6 455.304 40.2803   7
   6   6   6 460.908 41.3540   8
  -6  -6  -6 480.276 39.7884   9
  -6   6   6 468.181 40.2640  11
  -6   6   6 521.776 40.1562   8
  -6   6  -6 453.145 39.4709  10
  -7   0   1 356.640 27.9003   5
  -7   1   0 316.258 27.7194   5
   7   1   0 305.802 27.6366   1
  -7   1   0 287.741 27.6636   2
  -7   0  -1 256.006 27.4851   2
   0   1  -7 309.952 27.3656   1
  -1   0  -7 296.809 27.1704   1
  -7   0   1 322.172 27.7164   2
  -7  -1   0 273.091 27.5336   2
   7  -1   0 363.637 27.9550  29
  -7   0  -1 266.114 28.0577  27
   7   0  -1 404.397 28.1033  29
  -1   0   7 309.139 27.9483  13
   1   0   7 287.523 28.1008  13
  -7   1   0 296.698 27.6611  14
   0   1   7 270.382 28.0654  13
  -7   0  -1 302.598 27.7085  14
   0  -1   7 267.810 27.7229  13
   0   7   1 290.167 28.3036   6
  -1   7   0 307.210 28.5376   6
   0   7  -1 268.415 28.2296   6
   7   0  -1 413.285 28.0908  24
   7   0   1 337.306 27.4402  26
  -1   0  -7 263.654 27.9869  25
   0  -1  -7 280.566 27.9034  25
   1   7   0 354.697 27.4059  24
   1   0  -7 282.086 27.8477  25
   7   0  -1 367.540 27.4466  26
   7  -1   0 350.485 27.4615  26
   0   1  -7 284.529 27.9296  25
   7   1   0 338.317 27.4182  26
   0   7  -1 213.804 27.1811  24
   0  -7   1 304.956 28.1485  21
   0  -1  -7 311.632 27.9996  22
  -1  -7   0 292.642 28.2968  21
  -7  -1   0 350.886 28.5224  23
  -7   1   0 286.427 27.9799  23
  -7   0   1 377.734 28.3394  23
   0  -7  -1 290.400 28.3823  21
  -1   0  -7 297.260 27.8117  22
   1   0  -7 335.162 27.9814  22
   0   1  -7 307.246 27.7829  22
   1  -7   0 270.772 28.1153  21
  -7   0  -1 313.542 28.4238  23
   0  -7   1 322.570 27.7976  20
  -1  -7   0 308.353 27.6894  20
   1   0   7 306.943 27.5530  20
   0   1   7 309.872 27.5908  20
   0  -1   7 326.229 27.6321  20
  -1   0   7 328.914 27.6530  20
   0  -1  -7 328.962 27.6098  19
  -7   1   0 322.364 27.5443  18
   0   1  -7 324.435 27.5319  19
   0  -1   7 283.109 27.9807  17
  -7  -1   0 306.991 27.2382  18
  -1   0   7 288.359 27.9144  17
   1  -7   0 335.125 28.0504  16
   1   0  -7 346.794 27.5723  19
  -1   7   0 310.635 28.0781  18
   0   7  -1 292.133 27.8632  18
   0  -7   1 353.485 28.1128  16
  -1   0  -7 345.036 27.6161  19
   1   0  -7 289.429 27.6440  15
  -1   0  -7 314.813 27.5973  15
   0  -1  -7 324.671 27.6927  15
   1   7   0 332.433 28.2464   7
   7   1   0 327.974 27.6833   7
  -1   7   0 326.193 28.0976   7
   0   7  -1 315.373 28.0227   7
   7   0  -1 350.051 27.6487   7
   0   7   1 328.460 28.2819   7
   1   0   7 306.004 27.9211   8
   0   1   7 339.986 28.0868   8
   0  -1   7 306.295 27.7565   8
  -1   0   7 337.117 27.9154   8
   1   7   0 289.224 27.8482   8
   7   0   1 277.829 27.9981   8
  -7   1   0 342.419 27.7060  10
  -7   0   1 390.056 27.7887  10
  -1   7   0 306.302 27.5643   8
   0   7   1 310.346 27.8756   8
  -7   0  -1 347.851 27.7380  10
  -7  -1   0 335.820 27.6813  10
   0   7  -1 265.455 27.5539   8
  -2  -7   1 1.78922 1.63161   5
  -7   2   1 0.47393 1.46773   5
  -2   1   7 4.43591 1.32920   6
  -7   2   1 2.01636 1.71179   6
  -7   1  -2 0.19670 1.58651   5
  -7  -2  -1 2.84885 1.96908   5
  -7  -1   2 3.89639 1.93691   5
   2   1  -7-0.44844 1.62457   1
   7   2  -1 2.79252 1.96308   1
  -7   2   1 3.23328 2.15403   2
  -2   1   7 5.22095 1.75247   2
  -7   1  -2 2.42416 1.64332   2
   2  -7  -1 2.38862 2.24078  30
  -7   2   1 1.77543 2.65032  27
   7  -2   1 1.15982 1.66312  28
   7  -1  -2 6.16572 2.13629  29
   7   2  -1 3.77659 1.85242  29
  -7   1  -2 0.94260 2.66363  27
  -7  -1   2 7.09494 1.79650  14
  -7   2   1 1.78668 1.56765  14
  -7   1  -2-0.19091 1.44864  14
  -1  -2   7 3.91806 1.91812  13
  -2   7  -1 2.51075 1.09151  13
  -7  -2  -1 1.07450 1.93808  14
  -1  -7  -2 3.26790 2.43388  12
  -2   1   7 3.45512 2.24533  13
  -1   7   2 3.96624 2.96664   7
  -1   7   2-0.35056 2.95568   6
   1   7  -2 3.00734 2.16871   7
  -2   7  -1 0.21775 2.01254   7
  -1   2  -7 3.38325 2.53598  25
   1  -2  -7 2.36296 2.38356  25
  -2  -1  -7 15.1215 3.54716  25
  -2   7  -1-2.35497 3.47887  27
   7   2  -1 3.15625 1.18281  26
   1   7  -2 3.45743 1.73902  24
   7   1   2 5.12620 1.27934  26
  -1   2  -7 2.98523 2.19662  27
   1  -7   2 2.51848 1.84381  21
  -2  -1  -7 3.82736 2.48413  22
   7  -1  -2 2.39799 1.77813  22
   2   1  -7 0.44621 2.08620  22
   7  -1  -2 2.70853 1.58755  24
   7   2  -1 4.54949 1.85032  24
  -1   2  -7 2.92333 1.74097  22
  -7   1  -2 4.41034 2.80513  23
  -7   2   1 4.25475 1.90156  23
  -2  -7   1 2.52932 2.39632  21
   2  -7  -1 1.29942 3.02897  21
   7  -2   1 1.47233 1.11244  20
  -1  -2   7 3.59210 1.48870  20
  -1  -7  -2 4.35087 3.16775  21
   1   2   7 3.94547 1.54023  20
  -2  -7   1 5.47578 1.39083  20
   2  -1   7 1.42926 1.24628  20
   1  -7   2 4.28561 1.71663  20
   1   7  -2 1.46179 1.61911  18
  -7  -2  -1 2.49834 0.65738  19
   2  -1   7 1.43242 2.32363  17
   1  -2  -7 1.04953 1.25711  19
  -7   2   1 2.79830 1.84941  18
  -2  -1  -7 2.64317 1.50876  19
   2   1  -7 2.33363 1.18195  19
  -2   7  -1 3.67257 1.72506  18
  -1   2  -7 0.30124 1.17080  19
  -1  -2   7 2.97487 2.23226  17
   1  -7   2 5.60716 1.88009  16
   2   1  -7 0.37716 1.62319  15
  -2  -1  -7 5.05663 1.68548  15
  -2  -7   1 4.54844 2.22010  16
  -1   2  -7 1.42595 1.58477  15
  -2   7  -1 1.01994 1.13550   8
   2   7   1 1.10851 2.37388   8
   2  -1   7 4.48900 2.15556   8
   7   1   2 4.46465 2.92645   8
  -2   1   7 1.32235 2.14825   8
  -1   7   2 2.34757 2.57760   8
   7   2  -1 2.98555 1.81944   7
   1   2   7 3.49768 3.04326   8
  -1  -2   7 1.14098 1.67406   8
  -7  -1   2 2.21611 1.44703  10
   1   7  -2 0.19182 1.61965   8
  -7  -2   1 2.72253 1.89071   5
  -1  -7   2 2.15606 1.44266   5
  -7  -1  -2 5.19563 1.99990   5
  -7   2  -1 4.09776 1.58871   5
  -7   1   2 1.26359 1.55356   5
  -7   2  -1 2.51823 1.44084   6
  -2  -1   7-0.92567 1.35320   2
   7   2   1 0.15932 1.74845   1
  -7  -1  -2 10.7764 2.01020   2
  -1  -2  -7 1.63219 1.78307   3
   1   2  -7 2.92656 1.60332   1
  -7   2  -1-0.39483 1.99380   2
   7   1  -2 2.75599 2.00818   1
  -7  -1  -2 25.5367 3.80898  27
   7   2   1 3.34683 1.73466  29
   7   1  -2 3.56897 1.89179  29
   7  -2  -1 0.59899 1.67527  28
   7  -2  -1 3.43393 1.91732  29
  -7   1   2 4.78478 2.77560  27
  -2   1  -7 5.12667 2.23335  27
   2  -1  -7 2.44132 1.19999  28
  -7   2  -1 1.02102 1.42491  14
  -2  -1   7 2.36304 2.03202  13
  -2  -7  -1 1.53891 2.30429  12
  -7   1   2 1.87617 1.59860  14
  -7  -2   1 2.16405 1.65104  14
   1  -2   7 2.26016 1.92864  13
  -2   7   1-1.54840 2.28365  13
  -1   2   7-0.95679 2.74110  13
  -1   7  -2 2.11446 1.96168   7
  -2   7   1 1.07556 2.92903   7
  -2   7   1 1.81194 3.15577   6
  -1   7  -2 1.79802 3.17386   6
   1   7   2 2.26250 2.81618   6
   2   7  -1 0.82225 2.43336   7
   7   2   1 3.68341 1.16160  26
   2  -1  -7 1.30643 2.06720  25
   7   1  -2 2.67879 1.10260  26
  -2   1  -7 2.68201 2.77912  25
  -2   7   1 7.95275 3.46598  27
  -1  -2  -7 2.95233 2.91187  25
   7  -1   2 1.49832 0.95363  26
   2   7  -1 0.63039 1.41537  24
  -2  -7  -1 1.85043 2.66345  21
  -1  -2  -7 1.58608 2.68139  22
  -7   2  -1 2.61874 2.08000  23
   7  -2  -1 1.45003 1.57421  24
  -7  -2   1 2.40710 2.55661  23
   7   1  -2 0.97664 1.82108  24
  -1  -7   2-1.13120 2.14458  21
  -7  -1  -2 10.9529 3.89465  23
   2  -7   1 1.60993 2.10739  21
  -2  -7  -1-0.56250 2.35091  23
  -2   1  -7 3.63408 1.83652  22
   1   2  -7 3.61676 2.06280  22
  -1  -7   2 1.44095 1.35062  20
   1  -2   7 2.69954 1.39914  20
  -2  -1   7 1.04878 1.41919  20
   2   1   7 4.71907 1.49069  20
   1  -7  -2 4.39215 3.35585  21
  -7  -1  -2 1.58300 0.91593  19
   2  -1  -7 3.75223 1.49125  19
  -2  -1   7 0.21931 1.95941  17
  -1   7  -2 2.81961 1.70964  18
   1   2  -7 0.92919 1.11897  19
  -1  -2  -7 4.00107 1.44164  19
  -2   1  -7 4.27101 1.44451  19
  -1  -2  -7 4.29100 1.88179  15
   1   2  -7 1.87171 1.60239  15
  -2   1  -7 3.68200 1.61041  15
   2  -1  -7-0.40079 1.77694  15
   2  -7   1 3.12916 1.78816  16
  -1  -7   2 3.49037 1.80072  16
   1  -2   7 6.54841 2.03755   8
   7   1  -2 3.13145 1.73894   7
   1   7   2 2.24625 2.70082   8
  -1   2   7 2.04988 2.30559   8
   2   1   7 8.70723 3.13764   8
  -2   7   1 8.67100 2.05709   8
   7   2   1-0.62127 1.64972   7
   7  -1   2 2.34386 2.25183   8
  -2  -1   7-0.40430 1.75276   8
   2   7  -1 1.66931 2.08249   8
   7   2   1 2.56451 2.38449   8
  -7  -1  -2 7.45771 1.87786  10
  -1   7  -2 2.27326 1.31633   8
  -7  -2   1 2.72939 1.46568  10
  -7   2  -3 3.03409 1.96335   5
  -3   2   7 3.83426 1.78296   6
  -3  -7   2 3.65214 1.92311   5
  -7   2  -3 0.55134 1.18776   6
  -7  -3  -2 3.08877 1.88474   5
  -7   3   2 2.58357 1.37502   5
   3   2  -7 0.18907 1.89963   1
  -7  -2   3 1.01322 1.86042   2
   3  -7  -2-1.09074 3.15297   3
  -3   2   7 6.05292 2.26632   2
   7   3  -2 5.89920 2.18382   1
  -3  -7   2 5.00071 2.36100   4
  -7   2  -3 2.75513 1.81850   2
   7  -3   2-0.63856 1.79516  28
  -7   2  -3 5.03551 2.98845  27
   7  -3   2 1.24657 1.90641  30
   7  -2  -3 1.03395 2.12115  29
  -7   3   2 0.96322 1.95749  27
  -3   2   7 10.4265 2.83384  13
  -2   3  -7 3.20365 1.88293  15
   2   7  -3-1.05183 1.98557  15
  -2  -3   7 3.17414 1.62270  13
  -2   7   3 3.53594 2.96222  13
  -7  -2   3 2.20817 1.82056  14
   2   3   7 2.95710 2.60711   7
  -3   7  -2 5.74451 3.41001   6
   3   7   2 2.12351 2.88179   7
  -3   7  -2 3.30977 1.87927   7
  -2   7   3 2.17813 2.95547   6
  -2   7   3 5.46042 3.24528   7
  -3   7  -2 2.97110 1.73335  25
  -2   3  -7-2.94995 2.68676  27
   2   7  -3 2.57858 2.07672  24
   2  -3  -7 2.95365 2.32402  25
  -3  -2  -7 6.73087 3.14184  25
  -2   3  -7-1.92729 2.97202  25
   3  -2   7 2.91066 0.90514  26
   7  -2  -3 2.59383 1.76896  24
  -2   7   3 1.23623 2.15745  27
  -3   7  -2-1.70319 3.98198  27
  -2  -7  -3 4.18180 2.70898  23
  -7  -3  -2 5.70673 3.51460  23
   2  -3  -7 3.16539 2.72209  22
   7  -2  -3 3.69564 2.14967  22
   7   3  -2 4.84356 2.11009  24
  -2   3  -7 2.86608 1.60159  22
   2  -7   3 3.22265 1.69923  20
  -2  -7  -3 4.43102 3.39210  21
  -3  -7   2 2.66406 1.26581  20
   7  -3   2 2.73144 1.23721  20
   3  -7  -2-0.34931 2.94576  21
   3  -2   7 3.12849 1.44307  20
  -2  -3   7 2.16049 1.47864  20
  -2   3  -7 3.51297 1.38334  19
  -2  -3   7 3.63401 1.48466  16
   3   2  -7 1.08087 1.07204  19
   3  -2   7 4.24998 2.88744  17
  -7  -3  -2 2.46827 0.74992  19
  -3   7  -2 1.63707 1.89112  18
   7  -2  -3 3.66223 1.64366  15
   2  -7   3 5.01188 1.85331  16
  -3  -2  -7 4.91384 1.51703  15
   3   2  -7 1.84382 1.63466  15
   2  -3  -7 3.10857 2.01341  15
  -3  -7   2 7.02587 2.26043  16
  -2   7   3 2.63926 1.96721   8
   3  -2   7 3.80660 2.07048   8
   7   3  -2-1.17612 1.80020   7
   7   2   3 3.64710 2.81117   8
   2   3   7 5.76252 3.15181   8
   3   7   2 3.75017 2.65921   8
   2   7  -3 3.14019 2.35585   7
  -7  -2   3 3.78603 1.54282  10
  -7   2  -3 3.60324 1.69983  10
  -2  -7  -3 1.56645 2.18324  12
  -3   7  -2 0.73659 1.45670  11
  -7   3   2 2.56166 1.60700  11
  -7   3   0 11.0276 2.38153   6
   0  -7   3 12.0832 2.37771   5
  -3  -7   0 14.3388 2.46126   5
  -7   3   0 11.4680 2.18060   5
  -7   0  -3 11.9497 2.59508   5
  -7  -3   0 10.8594 2.64499   5
   0  -3  -7 8.24245 2.63573   3
  -3   0   7 9.65144 2.34685   2
  -7   3   0 11.2012 2.90450   2
   7   3   0 13.3903 2.64306   1
  -7   0  -3 12.7561 2.19990   2
  -3   0  -7 5.99017 2.70038  27
   7  -3   0 14.7943 2.74109  28
   3   0  -7 10.5647 1.89657  28
   7   3   0 16.4833 2.48841  29
  -7   0  -3 7.73375 3.38274  27
  -7   3   0 13.1629 3.51389  27
  -3   7   0 11.1053 2.16639  13
  -3   0   7 13.0153 2.79032  13
   0   3   7 12.2074 3.78444  13
  -7  -3   0 9.29577 2.42858  14
   0  -7  -3 12.9360 2.97535  12
  -7   3   0 9.62302 2.19143  14
   3   7   0 12.3420 3.14645   7
   0   7   3 18.3600 3.62224   6
   0   3   7 12.3405 3.15177   7
   0   7   3 14.9900 4.03414   7
  -3   7   0 15.4653 3.10716   7
   0   3  -7 14.6927 3.89551  27
  -3   0  -7 16.0816 3.97996  25
  -3   7   0 13.7653 3.81240  27
   0  -3  -7 11.7824 3.48964  25
   7   0   3 13.1210 1.93890  26
  -3   0  -7 11.0004 2.65824  22
   3   0  -7 14.2072 2.99256  22
  -7   0  -3 14.3616 4.38391  23
  -3  -7   0 11.6050 3.24279  23
   0  -3  -7 6.14256 3.23584  22
   7  -3   0 16.9827 2.28784  24
   3   7   0 17.7838 2.42416  24
  -7   3   0 12.2968 2.32718  23
  -3  -7   0 16.3844 3.38558  21
   0  -7  -3 13.5934 3.98266  21
   3   0   7 9.71775 2.01659  20
   3  -7   0 6.30431 2.78129  21
   0  -7   3 14.6398 2.39979  20
   0  -3   7 14.6399 2.29231  20
  -3  -7   0 12.7973 2.02550  20
   0   7  -3 14.4015 2.57707  18
  -7   0  -3 11.6524 1.85396  19
   0   3  -7 13.3566 2.10559  19
  -3   0   7 10.5741 2.54611  17
  -7   3   0 10.0659 2.44951  18
   3   0  -7 12.0941 1.99395  19
  -3   0  -7 12.1597 2.23617  19
  -3   7   0 11.2464 2.70319  18
   0  -7   3 13.8973 2.53303  16
   0  -3  -7 10.9087 2.52360  15
   3   0  -7 13.0636 2.49509  15
  -3   0  -7 12.1264 2.11708  15
   3  -7   0 14.8280 2.58128  16
   0   3   7 13.4438 3.55308   8
   3   7   0 11.1241 2.98134   8
   0  -3   7 17.7139 2.72486   8
   0   7  -3 14.0491 2.72776   7
   7   0   3 10.3210 3.31058   8
  -3   0   7 20.3347 3.00866   8
   0   7   3 19.9693 3.56785   8
   7   3   0 9.06564 2.55781   7
   3   0   7 12.0419 3.07393   8
   7   3   0 7.23139 3.08950   8
  -2  -7   3 6.95859 2.03339   5
  -7   3  -2 4.17379 1.77248   5
  -2   3   7 4.50185 1.77788   6
  -7   2   3 4.29487 1.95455   6
  -7   2   3 2.59180 1.33509   5
  -7  -3   2-2.40507 2.06691   5
  -7  -2  -3 3.64325 1.95431   5
  -7   3  -2 4.36916 1.68658   6
  -7   3  -2 5.35577 2.29848   2
  -2   3   7 6.96053 2.18438   2
   2   3  -7 5.17867 2.09686   1
  -3  -2   7 1.08328 1.45762   2
  -7   2   3 3.30893 2.13069   2
  -2  -7   3 0.28367 2.22919   4
   2  -7  -3 8.34859 3.82293   3
   7   2  -3-2.00954 2.42305   1
   7   3   2 2.25696 1.52618  29
   7  -3  -2 4.84451 2.02012  29
   7  -3  -2 2.25063 1.99559  28
   7  -2   3 2.46805 1.75265  28
   3  -2  -7 6.35846 1.76602  28
  -7   2   3 5.83200 2.11522  27
  -7  -2  -3 3.70346 2.89082  27
  -3   2  -7 1.70194 2.51988  27
  -7   3  -2 3.86933 1.53159  14
   2  -7  -3 0.26136 1.88945  12
  -3  -7  -2-0.32244 2.16613  12
  -3  -2   7 6.75042 2.01857  13
  -7  -3   2 3.67000 1.82618  14
  -2   3   7 4.68875 2.89289  13
  -3   7   2 1.99464 2.30263  13
   3   2   7 1.16560 2.12836   7
  -3   7   2 4.78914 2.68141   7
   2   7   3 2.16994 3.19357   7
  -3   7   2 1.86653 2.79318   6
   2   7   3-3.49748 3.04679   6
  -2   7  -3 1.19081 3.17992   6
   7   3   2 0.76915 2.09404   7
  -2   7  -3 3.64845 1.72547   7
   3   7  -2 1.31483 1.89222  24
   2  -3   7 1.12992 0.67797  26
  -3   7   2 2.04009 2.32597  27
   3  -2  -7 12.8929 2.73393  25
  -2  -3  -7 0.66545 3.13952  25
  -2   7  -3 6.38301 4.48081  27
   7  -2   3 2.52976 1.17461  26
   7  -3  -2 0.70926 1.50872  24
  -7   3  -2 4.19138 2.75870  23
  -3  -7  -2 1.00269 2.79254  23
  -3   2  -7 2.44702 1.58102  22
   7   2  -3 5.10985 2.25552  24
   3  -2  -7 9.89057 3.20577  22
   2  -7  -3 10.9909 3.41876  21
   3   2   7 2.01128 1.20660  20
   3  -7   2 3.95765 1.85882  20
  -3  -7  -2 6.18023 3.06197  21
  -3  -2   7 2.02022 1.46188  20
  -2  -7   3 2.98711 1.45392  20
   2  -3   7 3.71071 1.46038  20
   7  -2   3 2.03431 1.80649  17
  -2   7  -3 1.75663 1.72998  18
  -3  -2   7 2.65851 1.31651  16
  -3   2  -7 6.30692 1.55337  19
  -7  -2  -3 3.39163 1.00478  19
  -2  -3  -7 1.92799 1.52455  19
   2  -3   7 2.72468 2.41692  17
   2   3  -7 2.05976 1.21463  19
  -2  -3  -7 3.00892 1.59619  15
   3  -2  -7 3.91058 2.06564  15
  -3   2  -7 2.85053 1.71152  15
   3  -7   2 4.93445 1.80124  16
   2   3  -7 2.91992 1.91478  15
   2  -3   7 3.86106 1.83652   8
   7   3   2 2.61236 2.68768   8
  -3   7   2 3.01862 1.55503   8
   7   2  -3-1.99703 2.03540   7
   3   2   7 1.39649 3.43030   8
   2   7   3 3.82592 2.90525   8
  -7  -2  -3 1.06463 1.34308   9
  -2   7  -3 0.28619 1.09168  11
  -7  -3   2 1.23974 1.46523  10
  -7  -3   2 3.25422 1.24851  12
  -3   2  -7 1.73621 1.46563   9
  -3  -7  -2 3.28086 0.86983   9
  -2   7  -3 3.08368 1.01251   8
  -7   2   3 3.15143 1.50689  11
  -7  -4  -3 152.051 13.9854   4
  -4   3   7 152.778 14.1954   5
  -4  -7   3 136.648 14.2370   5
  -4  -7   3 143.842 14.3489   4
  -7  -4  -3 149.857 14.2975   5
  -7   4   3 159.012 13.5454   5
  -3  -4   7 155.875 14.7002   5
   7   4  -3 141.773 14.2046   1
   4   3  -7 162.090 14.2838   1
   3  -4  -7 165.901 14.5942   3
  -7   4   3 163.616 14.6345   2
   4  -7  -3 154.978 15.0117   3
  -4   3   7 195.490 14.5456   2
   7  -3  -4 153.155 14.1235  28
  -7   4   3 132.570 14.0299  27
  -3   7   4 148.077 13.9034  27
  -7   3  -4 151.556 15.1047  27
   7  -3  -4 171.665 14.4887  29
   7  -4   3 166.204 14.2276  28
  -3   4  -7 150.185 14.8417  27
  -7   4   3 189.112 14.5503  13
  -7  -3   4 108.743 13.5404  12
  -4   3   7 190.898 14.9299  13
  -7  -3   4 144.651 13.9597  14
  -3   7   4 120.892 14.4394  13
  -3   4  -7 180.673 14.0885   6
  -4   7  -3 171.630 15.1181   6
  -3   7   4 153.966 14.8203   6
  -7   3  -4 125.825 13.4435   6
  -7   4   3 168.285 14.4912   6
  -4   3   7 165.153 14.0654   6
   7  -3  -4 133.347 13.9288  24
  -4   7  -3 126.689 13.8237  25
  -3   4  -7 137.711 14.7717  25
   4  -3   7 153.876 13.4537  26
   3   7  -4 109.227 14.1838  24
   3  -4  -7 162.500 14.9238  22
  -4  -3  -7 190.291 15.4222  21
   4  -7  -3 131.084 14.6942  21
  -3   4  -7 125.674 13.5258  22
  -7  -4  -3 157.003 14.2298  21
  -7  -4  -3 139.330 15.4413  23
   7  -3  -4 139.678 14.1583  22
  -3  -7  -4 133.930 14.7144  23
   4  -3   7 160.354 13.9399  20
  -3  -4   7 139.006 13.8306  20
  -4  -7   3 148.982 13.6074  20
   7  -4   3 159.660 13.9419  20
   3  -7   4 165.214 14.1845  20
   4  -3   7 151.546 14.5227  17
  -3   4  -7 171.876 13.9686  19
   3  -7   4 147.388 14.0562  16
  -4   7  -3 153.496 14.3453  18
  -4  -7   3 177.583 14.6146  16
  -7  -4  -3 166.626 13.4702  19
  -4  -3  -7 167.339 13.9805  19
  -3  -4   7 137.466 13.7709  16
   4   3  -7 177.280 14.2446  15
  -3   4  -7 160.717 14.1437  15
   3   7  -4 167.857 14.3856  15
   3  -4  -7 183.630 14.6411  15
   4  -7  -3 121.110 14.4484  15
   7  -3  -4 164.879 14.1661  15
  -4  -3  -7 132.922 13.6244  15
   3   7  -4 140.980 14.2771   7
   3   4   7 138.607 14.4360   7
   4   7   3 145.455 14.8052   7
   7   4  -3 152.538 14.3913   7
  -3   7   4 163.108 14.8253   7
  -4   7  -3 134.356 13.6994  11
  -3   7   4 155.890 14.0859   8
   4   7   3 158.440 15.0184   8
  -3   4  -7 169.806 13.9005   9
  -7  -4  -3 159.223 13.8468   9
   7   3   4 128.485 14.8013   8
  -7   4   3 148.284 14.0098  11
  -4   3   7 184.534 14.4855   8
  -7   3  -4 151.005 13.9476  10
   3   4   7 146.447 14.9985   8
  -4  -7   1 17.4942 3.32040   5
  -7  -1   4 29.6898 4.06203   5
  -7  -4  -1 17.6460 3.22351   4
  -7   4   1 30.1851 2.98234   5
  -4   1   7 21.6524 4.21396   5
  -7  -4  -1 20.4632 3.52036   5
  -7   4   1 26.4865 4.11058   2
   4  -7  -1 26.7452 4.92144   3
  -7  -1   4 34.1914 3.87597   2
   4   1  -7 26.2530 3.73324   1
  -4  -7   1 23.5402 3.97584   4
  -7   1  -4 20.7901 2.99353   2
   7   4  -1 22.0271 3.66942   1
  -4   1   7 25.0257 3.55811   2
   1  -4  -7 24.0082 3.88970   3
   7  -4   1 32.7640 3.98962   3
  -7   4   1 24.5587 4.14670  27
  -7   1  -4 18.8199 4.36533  27
   7  -4   1 29.6203 3.79113  28
  -4   1   7 27.4828 3.83081  13
  -1   4  -7 24.0516 3.41398  15
  -7  -1   4 25.1109 3.43393  14
  -7   4   1 24.8637 3.22961  14
   1   7  -4 29.1383 3.78570  15
  -7   4   1 28.5566 3.92116   6
  -4   7  -1 26.9868 4.55865   6
   4   7   1 19.3520 4.10805   7
  -4   7  -1 24.4979 3.45869   7
  -1   7   4 24.2245 4.38374   6
   1   4   7 26.4077 4.35301   7
  -1   7   4 31.0533 4.70726   7
  -4   7  -1 21.5669 4.56448  27
   7   1   4 26.4138 2.96771  26
  -1   4  -7 19.0005 4.24983  25
   7  -1  -4 22.0798 3.54167  24
  -1   4  -7 22.2029 4.68506  27
  -4  -1  -7 24.7981 4.66526  25
   1  -4  -7 16.3208 3.78277  25
   7  -1  -4 20.4967 3.43703  22
  -4  -7   1 16.3509 3.86455  21
   4   1  -7 25.6659 3.83521  22
  -7  -4  -1 24.4045 4.65382  23
  -4  -7   1 27.6690 2.80721  20
   4  -7  -1 18.9766 3.95905  21
  -1  -7  -4 26.3370 5.22449  21
   7  -4   1 36.0855 3.59003  20
   4  -1   7 21.3447 2.96307  20
   4  -7  -1 28.9158 3.46503  16
  -1   4  -7 26.9189 3.10794  19
  -4   7  -1 21.4781 3.67422  18
  -7   1  -4 28.1988 2.99958  19
  -4  -1  -7 26.6099 3.18491  19
  -4   1   7 22.6080 3.18399  17
  -7  -4  -1 27.1571 2.37446  19
  -7   4   1 20.3751 3.54981  18
   4  -1   7 24.2358 4.04285  17
  -1  -4   7 18.1992 3.16563  16
  -4  -1  -7 26.9028 2.94121  15
   4   1  -7 24.2148 3.55660  15
   1  -7   4 25.7490 3.48965  16
   7  -1  -4 28.1279 3.39075  15
   7   1   4 29.3115 4.46666   8
   1   4   7 23.2369 4.44136   8
   7   4  -1 22.8019 3.67520   7
   4   7   1 24.3708 4.20498   8
  -1   7   4 21.5119 3.97209   8
   1   7  -4 26.5034 3.68521   7
   4  -1   7 29.3122 4.04605   8
  -4   7  -1 17.3836 3.21057  11
  -1  -7  -4 32.1394 4.12997  12
  -7   1  -4 22.4347 3.05523   9
  -7   4   1 22.2286 3.21446  11
  -7   1  -4 29.9392 3.46348  10
  -1  -7   4 24.7958 3.62515   5
  -4  -1   7 27.0498 4.30044   5
  -7  -1  -4 33.2061 3.86906   5
  -4  -7  -1 21.2774 3.16823   5
  -7  -4   1 22.0078 3.71242   5
  -7   1   4 24.3323 3.35377   5
  -7   4  -1 30.7357 3.39977   5
  -1  -7   4 24.5600 3.93975   4
  -7  -1  -4 23.5851 2.91940   2
  -4  -1   7 21.3963 3.27015   2
  -7   1   4 24.9021 3.56725   2
   7   1  -4 40.3698 4.34228   1
  -4  -7  -1 27.4836 4.27776   4
  -7  -1  -4 24.0001 4.14737  27
   4  -1  -7 22.0474 3.03212  28
   7  -4  -1 26.5900 3.83149  28
   4  -7   1 24.6532 3.85988  30
   7   4   1 21.6344 3.04446  29
  -7   4  -1 31.1114 5.08400  27
   7  -4  -1 30.4686 3.70726  29
  -4   1  -7 25.2682 4.15248  27
  -7   4  -1 23.4968 3.02745  14
  -7  -4   1 24.0253 3.38706  14
  -4  -1   7 29.7937 3.64847  13
  -4   7   1 23.4897 3.24228  13
  -1   4   7 23.0324 4.69634  13
  -1   7  -4 22.7007 4.83034   6
   4   7  -1 25.3282 4.18413   7
   1   7   4 25.1556 4.64468   7
   7   4   1 25.0505 3.76177   7
  -7   4  -1 27.5847 3.48425   6
  -4   7   1 29.9122 3.87390   7
  -4   7   1 26.9897 4.50656   6
   1   7   4 19.5554 4.16284   6
   4   7  -1 31.0028 3.69025  24
  -1  -4  -7 26.3637 4.54900  25
   1  -4   7 22.8703 2.40948  26
   7   1  -4 35.3094 4.25345  24
  -4   7   1 22.9582 4.23970  27
  -4  -7  -1 23.7353 4.36133  21
   4  -1  -7 29.8060 4.15367  22
  -7   4  -1 25.2622 3.47191  23
  -7  -4   1 15.8796 4.27565  23
  -4  -7  -1 16.0060 4.25986  23
  -1  -7   4 27.3279 3.28670  20
  -4  -7  -1 31.3018 2.96494  20
   4  -1  -7 30.1342 3.15763  19
  -4  -1   7 28.6531 3.40361  20
   1  -7  -4 18.5110 4.64077  21
   4  -7   1 30.5691 3.72681  20
   4   1   7 25.5132 2.95264  20
   1  -4   7 25.8225 3.26039  20
  -4   1  -7 24.9145 3.15309  19
   4  -7   1 31.3329 3.46969  16
   7  -1   4 21.0086 3.46026  17
   1   4  -7 28.4020 3.01689  19
  -7  -1  -4 26.5088 2.90342  19
  -7   4  -1 19.1687 3.44288  18
  -1  -4  -7 27.7499 3.63217  15
  -4   1  -7 28.0874 3.15413  15
   1   4  -7 28.2836 3.62500  15
   4  -1  -7 28.2357 3.67774  15
   7   1  -4 36.4483 3.40872  15
  -1   4   7 27.3085 4.19108   8
   1   7   4 23.5169 4.56539   8
  -1   7  -4 24.9497 3.48129   7
   4   1   7 30.7601 4.46426   8
  -4  -7  -1 24.5704 2.45516   9
   1  -4   7 27.6694 3.20113   8
   1  -7  -4 18.6427 3.45113  12
  -4   1  -7 28.6561 3.40616   9
  -7  -4   1 23.3487 3.13661  12
  -7  -1  -4 27.0285 3.22393   9
  -1   7  -4 18.7387 2.64051  11
  -4   7   1 19.5243 3.54120  11
   7   4   1 16.4908 4.01418   8
   4   7  -1 24.2374 3.91670   8
  -7  -4   3 129.769 14.5353   5
  -3  -7   4 147.568 14.3602   4
  -3  -7   4 149.871 14.2927   5
  -7  -3  -4 172.119 14.4359   5
  -3   4   7 130.741 14.0080   5
  -7   3   4 152.566 13.7191   5
  -7   3   4 184.923 14.5881   2
   3   4  -7 164.064 14.3166   1
   7   3  -4 166.392 14.4442   1
   7   4   3 167.308 13.8991  29
   7  -4  -3 166.418 14.3026  29
  -4   7   3 147.820 14.2240  27
  -4   3  -7 134.527 14.7207  27
  -7   4  -3 147.318 15.0468  27
  -3   7  -4 168.391 15.9078  27
   7  -3   4 158.080 14.0460  28
   4  -3  -7 163.886 13.9855  28
  -7   3   4 166.461 14.5144  13
  -4  -7  -3 143.729 14.5616  12
  -4   7   3 159.257 14.5633  13
  -7  -4   3 159.008 14.0724  14
  -3   4   7 164.625 14.9626  13
  -7  -4   3 98.6893 13.7171  12
  -4  -3   7 176.999 14.2256  13
   3   7   4 130.719 14.3756   6
  -4   7   3 162.983 15.0253   6
  -7   3   4 157.353 14.2696   6
  -7   4  -3 152.435 13.8265   6
  -3   7  -4 150.014 15.0901   6
  -3   4   7 144.318 14.1111   6
  -4   3  -7 126.725 14.7997  25
  -3   7  -4 128.135 14.2446  25
   7   3  -4 161.492 14.7360  24
   3  -4   7 149.785 13.4155  26
   4   7  -3 154.632 14.4841  24
   7  -3   4 155.973 13.6903  26
  -4  -7  -3 159.785 15.2454  21
   4  -3  -7 171.592 14.7728  22
  -3  -4  -7 179.617 15.5155  21
  -4   3  -7 128.390 13.5170  22
   3  -7  -4 127.793 14.9501  21
  -4  -7  -3 103.134 14.5805  23
  -7  -3  -4 146.675 14.0189  21
  -7  -3  -4 139.088 15.6183  23
  -3  -4  -7 144.317 13.9671  19
  -3  -7   4 162.245 13.8324  20
   3  -4   7 166.199 14.0896  20
   7  -3   4 155.872 13.8488  20
  -4  -3   7 141.635 13.8760  20
   4  -7   3 154.128 14.2488  20
  -4  -3   7 130.301 13.6512  16
   4  -7   3 150.434 14.1031  16
  -3  -7   4 173.851 14.3940  16
   7  -3   4 144.508 14.1895  17
  -7  -3  -4 158.984 13.6553  19
  -4   3  -7 164.745 13.9930  19
   3   4  -7 145.325 14.1720  15
  -4   3  -7 156.245 14.0375  15
   4   7  -3 160.365 14.3172  15
  -3  -4  -7 139.353 13.8548  15
   3  -7  -4 162.456 14.7847  15
   7  -4  -3 166.241 14.2694  15
   4  -3  -7 183.268 14.5768  15
   4   3   7 127.503 14.2763   7
   7   3  -4 141.208 14.2166   7
   7   4   3 153.374 14.5923   7
   3   7   4 167.472 15.1568   7
  -3   7  -4 159.852 13.8031   7
  -4   7   3 165.441 14.6501   7
   4   3   7 157.733 15.2247   8
  -4  -7  -3 163.770 13.5954   9
  -3   4   7 161.272 14.4134   8
  -4   3  -7 161.453 14.0140   9
  -4   7   3 155.915 13.7967   8
  -7   3   4 143.689 13.9561  11
  -3   7  -4 130.871 13.5426  11
   3   7   4 168.763 15.2575   8
  -7  -3  -4 165.319 13.9973   9
   7   4   3 148.222 15.0688   8
  -7   4  -3 143.249 13.9290  10
  -5   4   7 12.5392 2.96211   6
  -7  -4   5 13.7925 3.80001   5
  -7  -5  -4 12.5467 2.92624   4
  -7  -5  -4 13.6587 3.03282   5
  -5  -7   4 19.9857 3.39583   5
  -4  -5   7 15.1821 3.47477   5
   7   5  -4 9.55624 3.35086   1
  -5   4   7 14.5560 3.52462   2
  -5  -7   4 10.4674 3.04177   4
  -7   5   4 17.0766 4.07308   2
   5   4  -7 16.1738 3.51551   1
   5  -7  -4 19.1976 5.06360   3
   4  -5  -7 11.1975 4.07216   3
  -7   5   4 10.9859 2.60677  27
   7  -4  -5 9.86373 3.15946  28
  -7   4  -5 8.20021 4.34920  27
   7  -5   4 11.7133 3.12458  28
  -4   5  -7 19.3049 4.93780  27
  -4   7   5 11.7949 3.63868  13
  -4   5  -7 17.6675 3.14183  15
  -7  -4   5 11.1570 2.59198  14
   4   7  -5 12.3966 2.99784  15
  -7   5   4 14.8567 3.35793  13
  -4   7   5 14.6273 3.76231   7
  -7   5   4 18.1231 3.47934   6
  -5   7  -4 13.7406 3.57114   6
  -4   7   5 12.3879 3.71487   6
   4   5   7 11.5019 3.96332   7
   5   7   4 16.4822 3.96447   7
  -5   7  -4 10.6757 3.11024  25
   4   7  -5 9.95855 3.80028  24
  -5   7  -4 14.4950 5.48949  27
  -4   5  -7 14.9592 4.65720  25
   7   5  -4 16.6996 3.89108  24
   5  -4   7 12.3131 1.88557  26
  -7  -5  -4 14.5720 3.34405  21
  -4  -7  -5 7.22385 4.42496  23
   4  -5  -7 23.2300 4.67347  22
   7  -4  -5 16.1609 3.59576  22
  -7  -5  -4 12.0067 5.11801  23
   7  -5   4 16.0594 2.61293  20
  -5  -4  -7 6.89085 4.23195  21
  -4  -7  -5 21.0386 4.92163  21
  -4  -5   7 16.6094 2.49503  20
   4  -7   5 14.1008 2.67001  20
  -5  -7   4 13.0219 2.03583  20
   5  -4   7 15.6314 2.51991  20
   5  -4   7 8.75859 3.23009  17
  -4   5  -7 10.8344 2.33375  19
   7  -5   4 12.7796 2.41115  16
  -5  -4  -7 7.71627 2.23304  19
  -7  -5  -4 12.7538 1.95638  19
   4  -5  -7 13.0872 3.25297  15
  -4  -7  -5 11.8464 2.77820  15
   7  -4  -5 16.8226 3.40740  15
  -5  -4  -7 10.2600 2.11202  15
  -4  -5   7 14.2325 2.49113  16
  -5  -7   4 19.6697 3.39767  16
   5  -7  -4 12.3191 3.55436  15
   4  -7   5 9.35325 2.61992  16
   5   4  -7 13.2160 3.00891  15
   7   5  -4 14.3876 3.29593   7
   4   7  -5 9.40982 3.30260   7
  -5   4   7 17.5153 3.30250   8
   7   4   5 4.93568 3.99569   8
   4   5   7 13.9536 4.62954   8
  -4   7   5 10.2581 2.70074   8
  -7   4  -5 14.3475 2.68059  10
  -5  -4  -7 11.1242 2.86919   9
  -5   4   7 16.6296 2.94333  11
  -7   5   4 9.92299 2.55288  11
  -4   5  -7 13.7190 2.37863   9
  -7  -5  -4 13.3116 2.39178   9
  -5   2   7 12.3002 2.95513   5
  -5   2   7 7.91368 2.33430   6
  -5  -7   2 13.6565 2.88001   5
  -7  -2   5 11.5690 3.31204   5
  -2  -5   7 6.98907 2.20448   4
  -7   5   2 9.71790 1.63182   5
  -7  -5  -2 4.20931 2.52475   5
  -7  -5  -2 8.60462 2.73113   4
   5   2  -7 6.95376 2.68455   1
  -7  -2   5 8.15899 2.50543   2
  -5  -7   2 10.5182 2.89765   4
   2  -5  -7 10.4646 3.26295   3
  -5   2   7 4.17060 2.62355   2
   5  -7  -2 14.2861 4.08795   3
  -7   2  -5 12.5300 4.09799  27
   7  -5   2 7.66420 2.91777  28
  -7   5   2 6.24322 3.21227  27
  -5   7  -2 2.80304 4.66571  27
   7  -5   2 5.90680 3.03362  30
  -5   2   7 9.21667 2.79932  13
  -7   5   2 9.47594 2.75468  13
  -7  -2   5 10.1980 2.42486  14
  -2   7   5 7.30041 3.72232  13
  -2   5  -7 9.09110 2.70435  15
   2   7  -5 7.05225 2.68315  15
   2   5   7 6.05102 3.45695   7
   5   7   2 9.21288 3.37144   7
  -2   5  -7 13.4512 3.69162   6
  -2   7   5 10.6355 3.53045   6
  -5   7  -2 5.85521 3.44380   6
  -2   7   5 9.00561 3.67412   7
  -2   5  -7 5.30105 4.04862  25
  -2   5  -7 8.42946 4.05620  27
   7  -2  -5 15.3794 3.38463  24
   5  -2   7 17.3194 2.03279  26
  -7  -5  -2 7.30668 4.34591  23
  -7  -5  -2 4.99042 2.68524  21
   7   5  -2 11.8245 3.07528  24
  -2  -5   7 10.3268 2.14407  20
   2  -7   5 7.25686 2.20497  20
   5  -7  -2 8.92689 3.36541  21
  -5  -2  -7 10.4935 3.65051  21
   7  -5   2 10.4211 2.31551  20
   5  -2   7 19.8390 2.46101  20
  -5  -7   2 5.81958 1.36334  20
  -7  -5  -2 9.08356 1.36414  19
  -7   2  -5 10.0796 2.04552  19
  -5   7  -2 5.44932 2.64432  18
  -2   5  -7 6.41082 2.00951  19
   5  -2   7 19.4211 4.02364  17
  -5  -2  -7 9.50147 2.07423  19
   2  -7   5 4.84657 2.28024  16
  -5  -2  -7 8.26372 1.66533  15
   7  -2  -5 14.7226 3.06239  15
  -2  -7  -5 8.69185 2.79240  15
   5   2  -7 7.61372 2.41519  15
  -2  -5   7 6.82778 2.09900  16
   2  -5  -7 10.8947 2.95880  15
  -2   7   5 11.4527 2.99403   8
  -5   2   7 11.5706 2.85972   8
   7   2   5 8.51636 4.04071   8
   2   7  -5 5.79078 2.48220   7
   5   7   2 11.7846 3.39508   8
   7   5  -2 13.6543 3.11162   7
  -7   2  -5 10.5607 2.39970  10
  -7   5   2 9.97864 2.24601  11
  -5   7  -2 8.18228 2.17946  11
  -7   2  -5 8.52326 1.96332   9
  -5   2   7 6.54250 1.92111  11
  -5   0   7 5.19086 2.91516   5
  -7   0   5 2.04802 2.23596   5
  -7  -5   0 1.30502 2.08660   4
  -7   0  -5 2.81627 2.68172   5
  -5  -7   0-1.25443 2.10051   5
  -7  -5   0 0.29240 2.05687   5
  -7   0   5-2.13614 2.11000   2
   0  -7   5 1.04178 2.08213   4
   0  -5  -7 0.27800 2.92343   3
  -5   0   7 4.97540 2.35841   2
   7  -5   0 1.16098 2.76375   3
   5  -7   0-0.70506 3.50567   3
   7  -5   0 1.37334 2.45200  28
  -5   7   0 0.77749 3.48457  27
  -7   0  -5 4.00610 3.29235  27
  -5   0  -7 1.24513 2.96394  27
  -7   5   0-3.56582 3.36923  27
  -7   5   0 1.33159 1.34598  14
  -5  -7   0 0.34524 2.35981  12
  -5   0   7 4.56041 2.51556  13
  -5   7   0-1.74543 1.46280  13
   0   7  -5-2.03592 2.32491  15
   0   5   7 2.78002 3.18088   7
   5   7   0-2.76359 2.94757   7
   0   7   5 3.71787 2.77305   6
  -5   7   0 1.51779 1.94741   7
  -7   5   0-0.81082 2.18372   6
  -5   7   0 1.11476 2.87246   6
   7   0  -5 0.30523 2.40017  24
   0  -5  -7 0.29360 2.87911  25
   5   0  -7 3.08638 2.89504  22
   7   0  -5 0.72065 2.32207  22
  -5  -7   0-0.84558 3.21123  23
  -7  -5   0-2.28294 3.38429  23
   0  -7   5 1.94649 1.61424  20
   5   0   7 3.13918 1.39200  20
  -5   0  -7 2.85947 2.41901  21
   0  -7  -5-1.96915 4.01768  21
   0   5  -7 0.84286 1.41231  19
  -7   0  -5 2.59053 1.38938  19
  -5   7   0 0.33878 2.24662  18
  -7   5   0 0.91520 1.94272  18
  -5   0  -7-0.19392 1.50024  19
   0  -7  -5-0.65240 2.74377  15
   5   0  -7 2.57141 2.53366  15
  -5   0  -7 1.38232 1.35693  15
   0  -5   7 1.29176 1.75819  16
   0  -7   5 0.97478 1.92735  16
   0  -5  -7 0.82667 2.21461  15
   7   0  -5 0.19408 1.85574  15
   7   0   5 0.34567 3.21552   8
   0   7   5 1.03141 3.24855   8
   0   7  -5-1.10102 2.10521   7
   5   0   7 1.58928 3.13898   8
   0   5   7 0.35182 3.00188   8
   7   5   0-2.17996 2.63224   7
  -7   0  -5 3.20223 1.58357   9
  -7  -5   0 2.56871 1.95528  12
   5   7   0-1.46522 3.05088   8
  -5   0  -7-1.63212 1.77191   9
  -5   7   0 3.90090 1.99938  11
   7   5   0-1.15641 2.89288   8
  -7   2   5 18.4126 2.93249   5
  -5  -2   7 4.84590 3.12117   5
  -7  -5   2 9.24660 3.36179   5
  -2  -7   5 4.02962 2.47462   5
  -7  -2  -5 12.5858 3.04306   5
  -5  -7  -2 6.71039 2.15833   5
  -5  -2   7 7.89735 2.14887   2
  -7  -2  -5 5.11660 1.58598   2
   2  -7  -5 5.34406 3.84415   3
   7   2  -5 12.3971 3.07397   1
  -2  -7   5 8.96314 2.64660   4
  -7   2   5 28.9016 3.55858   2
  -5  -7  -2 8.06489 3.09654   4
   7  -5  -2 4.48585 2.73371  28
   5  -2  -7 10.7155 2.40948  28
   7   5   2 6.51653 1.84419  29
  -7   5  -2 12.2515 4.04432  27
  -5   7   2 7.03535 3.27016  27
  -5   2  -7 26.1021 4.32382  27
   7  -5  -2 12.0432 2.57790  29
  -7  -2  -5 9.75892 3.43373  27
  -5  -2   7 8.92270 2.58932  13
  -7  -5   2 6.11453 2.38192  14
  -5   7   2 5.18200 2.29614  13
  -7  -5   2 11.8447 2.57098  12
   2   5  -7 6.83763 2.60648  15
  -7   5  -2 10.0946 1.93522  14
  -5   7   2 8.81709 2.69993   7
  -2   5   7 8.72398 2.90455   6
  -2   7  -5 18.5764 4.47345   6
  -5   7   2 10.0795 3.55553   6
  -7   5  -2 11.6345 2.66540   6
   2   7   5 11.3126 3.24024   6
   2   7   5 12.6728 3.76975   7
   7   5   2 6.36886 3.31811   7
  -7   2   5 30.9879 3.85176   6
   7  -2   5 9.05158 1.69851  26
  -2   7  -5 11.6706 5.53110  27
   7   2  -5 10.5702 3.27568  24
   2  -5   7 8.77474 1.26514  26
  -5   2  -7 42.3731 5.80163  25
  -7  -2  -5 11.9075 2.13739  21
  -7   5  -2 10.6116 2.57834  23
  -5  -7  -2 8.32329 3.40765  21
  -5  -7  -2 4.23619 3.48291  23
   5   7  -2 9.57311 2.58501  24
   5  -2  -7 14.8849 3.56208  22
   2  -5   7 12.0868 2.14358  20
  -2  -7   5 8.72242 2.08864  20
  -5  -2   7 9.42810 2.20517  20
  -2  -5  -7 9.51675 4.34273  21
   5  -7   2 7.06338 2.53536  20
   2  -7  -5 8.15732 4.17470  21
  -7   5  -2 13.5587 2.73360  18
   2  -5   7 6.66718 2.17670  16
  -7  -2  -5 10.1920 1.77837  19
   7  -2   5 6.07410 2.63698  17
  -5   2  -7 21.2853 3.19359  15
   2  -7  -5 7.74911 3.19578  15
   5  -7   2 12.1601 2.58774  16
   5  -2  -7 10.6009 2.87166  15
  -2  -7   5 9.27930 2.25724  16
   7   2  -5 10.7326 2.27526  15
   7  -5  -2 10.4422 2.79465  15
  -5  -2   7 6.75801 1.61406  16
  -2  -5  -7 7.02457 2.51259  15
   7   5   2 5.17278 3.62970   8
  -2   5   7 5.84740 3.25914   8
   5   7  -2 6.35443 2.89007   7
   5   2   7 11.5688 4.00966   8
  -2   7  -5 9.70574 2.26043   7
   2   7   5 10.5388 3.98751   8
  -5  -7  -2 7.91929 1.45306   9
  -5   2  -7 25.3959 3.03728   9
  -5  -7  -2 4.08987 2.74443  12
   2  -7  -5 10.7313 2.66409  12
  -7   2   5 22.9683 2.84518  11
  -7  -2  -5 11.3589 2.24294   9
  -7  -4  -5 12.3006 2.36989   4
  -5  -4   7 15.8622 3.85877   5
  -4  -7   5 17.6838 3.26699   5
  -7  -4  -5 11.8478 3.06965   5
  -7  -5   4 9.16429 3.45662   5
  -7   4   5 8.85948 3.07555   6
  -7   4   5 16.3469 3.51836   2
   7   4  -5 11.5664 3.34040   1
  -5  -7  -4 13.9292 3.80943   4
  -4  -7   5 14.4071 3.00538   4
  -5   4  -7 7.32426 4.08259  27
   7  -5  -4 12.3393 3.21307  28
   7  -5  -4 14.5889 3.13098  29
  -7   5  -4 19.0661 5.14651  27
   5  -4  -7 16.9632 3.09342  28
   7   5   4 16.3448 2.29900  29
  -7  -5   4 18.4607 2.74910  14
   5   7  -4 10.4831 2.80613  15
  -5   7   4 20.7316 3.93667  13
  -4   5   7 16.2653 4.08659  13
   4   5  -7 15.6228 3.14582  15
  -5   4  -7 13.6578 2.64819  15
  -7   4   5 9.13342 3.31062  13
  -5   7   4 8.00911 3.64225   6
  -4   7  -5 17.5237 4.07126   6
  -7   5  -4 13.8699 2.63679   6
   5   4   7 16.5639 3.84534   7
   4   7   5 18.0714 4.31980   7
  -4   5   7 10.5100 2.96630   6
   7   5   4 14.4661 3.79612   7
  -5   4  -7 10.2519 4.52448  25
   4  -5   7 14.9490 1.88227  26
  -4   7  -5 14.4563 3.70315  25
   7  -4   5 12.3905 2.03860  26
   5   7  -4 13.6883 3.67380  24
  -4   7  -5 12.4625 5.10376  27
  -7  -4  -5 13.8009 5.19872  23
   5  -4  -7 18.2052 4.21400  22
   7  -5  -4 6.35300 3.36204  22
  -7  -4  -5 15.9691 3.23118  21
  -5  -7  -4 9.86642 4.34951  21
  -5  -7  -4 14.5425 4.46743  23
  -4  -5  -7 13.7240 4.70399  21
   5  -7   4 12.6685 2.66538  20
   7  -4   5 12.8323 2.46021  20
  -5  -4   7 12.2785 2.38519  20
  -4  -7   5 16.8470 2.32699  20
   4  -5   7 11.9593 2.46123  20
  -5   4  -7 15.8872 2.57105  19
  -7  -4  -5 12.4028 2.14352  19
  -4  -5  -7 14.2793 2.72805  19
  -5  -4   7 15.6537 2.45051  16
   5  -4  -7 17.4763 3.52301  15
   4  -7  -5 13.6258 3.65712  15
   5  -7   4 11.6458 2.73927  16
  -5  -7  -4 10.1479 2.62054  15
  -4  -5  -7 11.3513 2.52711  15
   7  -5  -4 11.2220 3.22597  15
  -4  -7   5 18.5463 3.07851  16
   5   4   7 16.6658 5.11118   8
  -4   5   7 12.9552 3.31058   8
   7   4  -5 10.8368 3.24413   7
   5   7  -4 16.3682 3.54406   7
   7   5   4 13.6118 4.58331   8
  -5   7   4 17.8393 2.73354   8
   4   7   5 17.5242 4.86432   8
  -5   7   4 12.2544 3.15240  11
  -5  -7  -4 13.2185 2.24695   9
  -5   4  -7 14.4373 2.45573   9
  -7   4   5 9.09526 2.65129  11
  -7  -4  -5 12.1611 2.52103   9
  -7   5  -4 14.1368 2.64579  10
  -6   5   7 3.23460 2.70246   6
  -7  -5   6 9.07173 3.65069   5
  -6  -7   5 14.0268 3.36806   5
  -7  -6  -5 7.76450 2.79424   5
  -6  -7   5 5.26665 2.47854   4
  -5  -6   7 7.21465 3.12847   5
  -6   5   7 7.86639 3.24794   2
   5  -6  -7 2.84485 3.79017   3
  -7  -6  -5 2.92469 2.48641   4
   6  -7  -5 4.47690 3.67948   3
   6   5  -7 3.03607 3.32436   1
  -5  -7  -6 8.28832 3.51737   4
  -6   7  -5 5.53255 5.73391  27
   7  -5  -6 4.00275 2.98556  28
  -7   5  -6 1.58383 4.28597  27
  -5   6  -7 4.03144 4.88593  27
  -7  -5   6 7.08839 2.30000  14
   6   5  -7 2.28625 2.51075  15
   5   7  -6 9.76232 2.71080  15
  -5   7   6 8.54065 3.61834  13
  -6   5   7 4.17343 3.14287  13
  -7   6   5 6.73491 2.95033  13
   6   7   5 9.12967 3.76975   7
  -6   7  -5 3.93266 2.97693   6
   5   6   7 6.49035 3.83608   7
   7   5   6-0.39690 3.35011   7
  -7   6   5 2.64105 2.96514   6
  -5   7   6 1.21169 3.15205   6
  -7   5  -6-1.26935 3.56767  25
   7   6  -5 7.42306 3.77220  24
   6   5  -7-0.49847 4.17375  24
  -5   6  -7 5.43978 4.63823  25
   5   7  -6 3.71120 3.98146  24
   6  -5   7 6.00069 1.45578  26
  -5  -7  -6 8.84616 4.60180  23
   7  -5  -6 7.40292 3.23178  22
  -7  -6  -5 3.03397 4.97090  23
  -7  -6  -5 8.45259 3.46592  21
   6  -5   7 3.74318 1.85521  20
  -6  -5  -7 10.5926 4.42488  21
  -7  -5   6 9.32624 1.99351  20
  -5  -7  -6 9.30823 4.41320  21
  -5  -6   7 3.38941 1.87615  20
   7  -6   5 7.51771 2.16704  20
   5  -7   6 5.70752 2.05381  20
  -5  -7  -6 5.00386 1.87772  19
  -7  -6  -5 4.24923 1.80013  19
  -6  -5  -7 3.39991 1.87423  19
   7  -5  -6 3.72718 2.77129  15
   7  -6   5 2.79163 2.00487  16
   5  -7   6 2.91782 2.21954  16
  -5  -7  -6 5.14470 2.38519  15
  -5  -6   7 4.54273 1.94377  16
   5  -6  -7 8.31802 3.10057  15
   6  -7  -5 4.44730 3.31132  15
  -6  -7   5 7.33613 2.64319  16
  -6   5   7 5.25623 2.88623   8
  -5   7   6 6.40905 2.85219   8
   7   6  -5-0.36879 2.96350   7
   7   5   6 8.99630 5.05809   8
   5   6   7 8.64040 4.83888   8
   6   5  -7 2.15142 2.91365   7
  -6   5   7 3.12095 2.36831  11
  -7   6   5 4.36524 2.46484  11
  -6   7  -5 2.79654 1.77515  10
  -5  -7  -6 7.70553 2.10333   9
  -6  -5  -7 5.88738 2.32948   9
  -7  -6  -5 3.64804 1.95778   9
  -7   5  -6 8.45090 2.31304  10
  -6   3   7 1.56419 2.29619   6
  -7  -6  -3 3.23693 2.24509   5
  -6  -7   3 3.87344 2.43149   4
  -7  -3   6 1.74854 2.99449   5
  -6   3   7-1.29140 1.74257   5
  -6  -7   3 5.56916 2.74451   5
  -3  -6   7 5.46487 2.05929   4
  -3  -6   7 3.41812 2.55806   5
  -7  -3   6 3.58919 2.26839   2
  -7  -6  -3 0.89694 2.34702   4
   6   3  -7 4.43325 2.84291   1
  -6   3   7-0.29295 2.49659   2
   3  -6  -7 2.56526 3.31929   3
   6  -7  -3 4.17691 3.58635   3
  -7   3  -6 6.17535 3.78659  27
  -7   6   3 2.98039 2.50920  27
   7  -3  -6 2.26455 2.16737  28
  -6   7  -3 2.13977 4.09200  27
  -6  -7   3 7.96978 2.18926  14
   3   7  -6 2.97887 2.41539  15
  -3   6  -7 2.44002 2.24238  15
  -6   3   7 4.94519 2.99245  13
  -3   7   6-2.15758 3.36089  13
  -7  -3   6 0.92046 1.91893  14
  -7   6   3 4.74330 2.58951  13
  -6   7  -3 2.01866 2.90502   6
  -3   7   6 5.17199 2.84679   6
  -7   6   3-0.36321 2.86311   6
   6   7   3 3.79819 3.03590   7
  -3   6  -7-0.76473 3.65996   6
  -3   7   6 4.70134 4.03402   7
   3   6   7 2.46834 3.61372   7
   6   3  -7 5.68748 3.68517  24
  -3   6  -7 2.16193 4.30068  27
   6  -3   7 3.75424 1.24379  26
  -3   6  -7 4.85266 3.83960  25
  -7  -6  -3 1.88259 2.52445  21
   7  -3  -6 8.17375 3.13316  22
  -7  -6  -3 1.06573 3.95481  23
   7   6  -3 4.54082 2.77742  24
   7  -6   3 4.05424 1.80464  20
   3  -7   6 6.33638 2.02841  20
  -3  -7  -6-0.56521 4.47252  21
  -6  -3  -7-0.75559 2.80809  21
  -3  -6   7 4.18744 1.73098  20
   6  -3   7 1.03651 1.54200  20
  -7   3  -6 1.79324 1.70590  19
  -6  -3  -7 0.21552 1.67016  19
  -3   6  -7 2.50407 1.78262  19
   6  -3   7-0.34853 2.77827  17
   7  -3  -6 3.61156 2.48858  15
   6  -7  -3 0.73971 2.86648  15
   6   3  -7-0.50760 2.07177  15
  -3  -7  -6 0.60213 2.57732  15
   3  -7   6 2.58943 2.10237  16
   3  -6  -7-1.06202 2.80636  15
  -3  -6   7 4.07392 1.89612  16
   7   6  -3 0.34651 2.74733   7
  -3   7   6 3.50368 2.77728   8
   3   7  -6 2.97869 2.76777   7
   7   3   6 2.95965 3.90471   8
  -7   3  -6 6.09714 1.90619   9
  -7  -6  -3 1.84773 1.39480   9
  -7   6   3 1.81577 2.10904  11
  -6  -3  -7 0.27067 1.96709   9
  -6   3   7 3.92868 1.89828  11
  -7  -1   6 59.6819 6.87675   5
  -6  -7   1 42.9762 6.09167   5
  -6   1   7 55.9687 6.45271   5
  -7  -6  -1 55.8903 6.19905   4
  -7  -6  -1 46.9526 6.06408   5
   6  -7  -1 53.0114 7.02456   3
  -6   1   7 52.4679 6.09750   2
  -7  -1   6 59.5451 6.17662   2
   1  -6  -7 51.4004 6.89610   3
   7  -6   1 53.5167 6.69644   3
   6   1  -7 60.8995 6.65833   1
   7  -6   1 44.7540 6.35761  30
   7  -6   1 55.9433 6.57667  28
   7  -1  -6 54.7132 5.94471  28
  -6   7  -1 60.4210 7.81763  27
  -6  -1  -7 41.9810 6.53429  27
  -7   6   1 57.5255 6.71791  27
  -7   1  -6 49.8770 6.91094  27
  -6  -7   1 58.1063 6.67742  12
  -1   7   6 38.8426 6.87027  13
  -6   1   7 53.7906 6.41303  13
  -6   7  -1 55.5939 6.60724   6
  -7   6   1 58.2103 6.69072   6
  -1   7   6 51.2473 6.55628   6
   7   6  -1 76.4492 6.90727  24
  -1   6  -7 64.5926 8.23108  27
   7  -1  -6 42.6957 6.09662  24
   6  -1   7 59.6934 5.46877  26
   6   1  -7 61.1180 6.76237  22
  -7  -6  -1 34.9713 6.76828  23
   7  -1  -6 48.8605 6.34189  22
  -1  -6   7 59.1739 5.89450  20
   7  -6   1 59.7938 6.29905  20
  -1   6  -7 59.4694 5.73989  19
   1  -7   6 50.3090 5.92929  16
  -6  -1  -7 59.7306 5.80722  19
  -1  -6   7 50.6921 5.85831  16
  -7   1  -6 63.5010 5.79883  19
   6  -1   7 46.2531 6.37510  17
  -1   6  -7 58.1322 6.30403  15
   1   7  -6 53.2009 6.25883  15
   6   1  -7 66.2753 6.21468  15
  -1  -7  -6 54.5628 6.39049  15
   1  -6  -7 64.9304 6.74299  15
   7  -1  -6 65.2427 6.16027  15
   6   7   1 54.7125 6.71615   7
   1   7  -6 41.4585 5.81361   7
   7   6  -1 56.8969 6.62492   7
   6   7   1 39.8253 6.59699   8
   7   1   6 44.3454 6.95875   8
   1   6   7 60.1409 7.14624   7
  -1   6  -7 52.8986 5.71683   7
   7   6  -1 49.0215 6.70668   8
  -6  -1  -7 60.2483 6.06579   9
  -7   1  -6 60.2639 5.92832   9
  -6   7  -1 46.3848 5.86833  11
  -1   7   6 57.2118 6.62902   8
   1   6   7 67.3970 7.50988   8
  -1  -7   6 49.7784 6.03496   4
  -7   1   6 46.6466 6.14392   5
  -1  -7   6 50.4067 6.20693   5
  -7  -6   1 47.1456 6.27920   4
  -6  -1   7 65.5787 7.26902   5
  -6  -7  -1 43.9443 6.00227   5
  -7  -6   1 52.2747 6.45411   5
  -6  -7  -1 51.1869 6.50935   4
  -7   1   6 48.2640 6.15987   2
   1  -7  -6 59.1656 7.09021   3
   7  -6  -1 66.1958 6.90471   3
   6  -7   1 54.3312 6.86659   3
  -6  -1   7 51.4194 6.15061   2
   6  -7   1 47.1166 6.44340  30
  -6   1  -7 55.6652 7.07691  27
   7  -6  -1 63.4458 6.23369  29
  -7   6  -1 58.9690 7.53308  27
  -7  -1  -6 60.3633 6.93168  27
  -6   7   1 42.0638 6.74909  27
   7  -6  -1 58.2682 6.70588  28
   6  -1  -7 65.3555 6.06857  28
  -6  -7  -1 46.7702 6.33574  12
  -6   7   1 51.3705 5.89589  13
  -7  -6   1 39.5693 6.04777  12
  -7   1   6 66.3029 6.57775  13
  -6  -1   7 61.0504 6.39594  13
  -7   6  -1 50.7521 5.48835  14
  -6   7   1 68.2491 7.22466   6
  -1   6   7 50.9016 6.26916   6
  -7   6  -1 67.1787 6.56800   6
   7  -1   6 63.0546 5.65329  26
   7   1  -6 64.9937 7.00429  24
  -6   1  -7 46.6120 7.25378  25
  -1   7  -6 62.0183 8.75063  27
   6   7  -1 66.0222 6.62313  24
   7   1  -6 66.3458 6.65850  22
  -6  -7  -1 60.9044 6.90472  21
   6  -1  -7 62.1158 6.76795  22
  -7  -6   1 53.5070 7.54963  23
  -6  -7  -1 47.8771 7.02868  23
   6  -7   1 60.2245 6.44921  20
  -1  -7   6 66.9419 6.04028  20
  -1  -6  -7 57.3736 7.86669  21
   1  -6   7 50.4954 5.84353  20
   1  -7  -6 54.7245 7.71469  21
  -1  -7   6 56.3792 6.15049  16
   1  -6   7 45.7039 5.93844  16
  -7   6  -1 60.0769 6.43916  18
  -6   1  -7 67.3152 5.97181  19
   1   6  -7 55.8072 5.71597  19
  -7  -1  -6 64.1321 5.84312  19
   7  -1   6 51.0051 6.39336  17
   7   1  -6 65.1697 6.25426  15
  -6   1  -7 59.0083 5.63303  15
   1   6  -7 60.2953 6.37447  15
   7  -6  -1 50.9306 6.40028  15
  -1  -6  -7 57.7246 6.42933  15
   6  -1  -7 63.9252 6.37610  15
   1   7   6 55.3207 7.11551   7
  -1   6   7 60.2410 7.19781   7
   7   6   1 47.7698 6.59871   7
   1   6  -7 54.7981 6.08811   7
   6   7  -1 54.6494 6.74047   7
  -1   7  -6 57.1965 5.91856   7
  -6   7   1 46.5218 6.10335  11
   7   6   1 61.5415 7.14643   8
  -6   1  -7 56.9314 6.03221   9
  -7   1   6 59.8654 5.83273  11
  -7   6  -1 54.5581 6.07046  11
   6   7  -1 44.3779 6.57287   8
   1   7   6 56.2027 7.11621   8
   6   1   7 52.2260 7.15740   8
  -1   6   7 53.2396 6.72281   8
  -7  -6   3 2.76908 2.39781   4
  -7   3   6 0.27598 2.15219   6
  -7  -3  -6 7.94015 3.03275   5
  -6  -3   7 1.76139 2.94669   5
  -6  -7  -3 2.87874 1.95939   5
  -3  -7   6 5.07183 2.52524   5
  -7  -6   3-1.14134 2.73548   5
  -7   3   6 4.25495 1.66020   5
  -6  -7  -3 2.79618 2.81317   4
  -6  -3   7 0.72808 1.97801   2
   3  -7  -6 2.03055 3.64376   3
  -7   3   6-1.80965 2.73166   2
  -3  -7   6 0.84189 2.45595   4
   7  -6  -3 3.41753 3.31932   3
  -6   7   3 2.19259 2.54489  27
  -6   3  -7-1.68695 3.76748  27
   6  -3  -7 2.08178 2.33024  28
  -7  -3  -6 1.34714 2.98448  27
  -3   7  -6 5.93695 2.59847  15
  -6   3  -7 0.83017 1.74557  15
  -7  -6   3 3.21102 2.53002  12
   3   6  -7 3.71529 2.48966  15
  -7  -6   3 3.73678 1.96218  14
  -3   6   7 0.87776 3.21624  13
  -6   7   3-0.31280 2.32470  13
  -3   6   7 0.31377 2.56646   6
   7   6   3 2.78308 2.91457   7
  -6   7   3 0.81556 3.21002   6
   3   7   6-0.44053 4.00211   7
  -3   7  -6 3.18472 3.84814   6
  -7   6  -3 3.42413 2.37711   6
  -3   7  -6 0.80775 3.81930  25
   7   3  -6 1.67278 2.92484  24
   7  -3   6 0.45663 1.22237  26
  -3   7  -6 3.05878 4.39302  27
   6   7  -3 10.0833 3.45834  24
  -6   3  -7 0.92765 3.76937  25
  -7  -3  -6 0.55857 2.17782  21
  -6  -7  -3 3.12970 3.12629  21
  -6  -7  -3 1.49570 3.96599  23
   6  -3  -7-0.34180 3.06825  22
   3  -6   7 1.75652 1.69817  20
   7  -3   6 0.19271 1.57425  20
  -6  -3   7-0.22175 1.74221  20
   6  -7   3 2.04500 2.17210  20
  -3  -6  -7 2.20033 4.65117  21
  -3  -7   6 4.86307 1.78541  20
  -6   3  -7 3.69219 1.94837  19
  -7   6  -3 4.63383 2.30114  18
  -7  -3  -6 3.79240 1.58868  19
   7  -3   6-0.96416 2.61490  17
   6  -7   3 1.16656 1.81161  16
  -3  -7   6 0.51387 2.23963  16
   6  -3  -7 1.76019 2.36313  15
   3  -6   7 2.51848 2.05204  16
   3  -7  -6 1.15782 2.90092  15
   7  -6  -3 1.32277 2.81305  15
  -3  -6  -7 4.47574 2.29457  15
   7   3  -6 3.00258 2.01474  15
  -3   6   7 1.57521 2.56353   8
   7   6   3-0.47990 3.62668   8
   3   7   6-1.88154 4.37819   8
   6   3   7 5.61031 3.89686   8
   3   6  -7 3.76443 2.41756   7
   6   7  -3 7.53877 3.05285   7
  -7   3   6 3.51190 1.78656  11
  -6  -7  -3 3.44406 1.35663   9
  -7  -3  -6 1.26532 1.81223   9
  -6   3  -7 0.95438 1.55396   9
  -6   7   3-0.67807 2.39001  11
  -5  -7   6 3.14376 2.47816   4
  -5  -7   6 10.1235 3.08738   5
  -6  -5   7 4.40417 3.44792   5
  -7  -6   5 0.86030 2.88094   5
  -7  -5  -6 7.09371 2.85666   5
  -7   5   6 0.33926 2.77068   6
  -7   5   6 11.3501 3.66361   2
  -6  -7  -5 5.45868 3.40961   4
   5  -7  -6 6.23903 4.01515   3
   7  -6  -5 7.76487 3.92675   3
  -6   5  -7-0.52144 4.65138  27
  -5   7  -6 5.73587 5.45214  27
  -7   6  -5 11.2722 5.15323  27
   7  -6  -5 9.10960 3.33329  28
  -5   6   7 5.92412 3.81689  13
   6   7  -5 6.94671 2.63766  15
   7   5  -6 6.87252 2.57796  15
   5   6  -7 1.19988 2.35475  15
  -7   5   6 5.23505 3.12160  13
  -6  -5   7 5.04023 2.21021  14
  -6   7   5 10.5165 3.52313  13
  -7  -6   5 7.21824 2.20464  14
  -6   7   5 7.54226 3.64801   6
  -5   6   7 3.82107 2.90760   6
   7   6   5 5.14821 3.24520   7
  -5   7  -6 7.90515 3.34563   6
   5   7   6 6.46603 3.75258   7
   6   5   7 9.07847 3.36062   7
   7  -5   6 0.16392 1.33257  26
   5  -6   7 4.08249 1.25274  26
   7   5  -6 7.18251 3.63792  24
   6   7  -5-2.69784 3.69230  24
  -5   7  -6 13.3165 3.93673  25
  -6   5  -7 6.31478 4.35428  25
  -7  -5  -6 4.50575 5.58317  23
   6  -5  -7 2.01325 3.78220  22
  -6  -7  -5 3.16547 3.70630  21
  -6  -7  -5 11.2540 4.95118  23
  -7  -5  -6 10.5219 3.59704  21
  -5  -7   6 6.41580 1.73183  20
   5  -6   7 3.75206 2.13522  20
   7  -5   6 6.11789 2.05932  20
  -5  -6  -7 9.01299 4.29748  21
  -6  -5   7 6.73667 1.90779  20
   6  -7   5 5.23108 2.16637  20
  -7  -5  -6 8.20270 1.88194  19
  -6  -7  -5 1.58597 1.62409  19
  -6   5  -7 3.41422 2.13879  19
  -5  -6  -7 1.84805 1.77129  19
   5  -6   7 3.18321 2.23637  16
   6  -7   5 4.57276 2.26557  16
  -5  -6  -7 3.19337 1.95221  15
  -6  -5   7 5.30266 2.01971  16
  -5  -7   6 5.27327 2.36457  16
   6  -5  -7 4.21825 2.89807  15
   5  -7  -6 7.41287 3.71382  15
   7  -6  -5 0.36775 3.07482  15
  -5   6   7 3.96373 2.49671   8
   7   6   5 0.55448 4.10411   8
   6   7  -5 2.23634 3.08490   7
   6   5   7 6.47486 4.46725   8
   7   5  -6 5.41208 3.04729   7
  -7   6  -5 7.27281 2.10683  10
  -6   5  -7 6.34243 1.88208   9
  -7  -5  -6 4.44160 2.17171   9
  -5  -6  -7 5.93778 2.20714   9
  -6   7   5 10.3458 2.85188  11
  -6  -7  -5 5.81219 1.89792   9
  -7   5   6 3.66991 2.39931  11
  -7   0   7 10.2655 3.15739   5
  -7  -7   0 9.11058 2.84499   5
  -7  -7   0 7.86899 2.84854   4
   7  -7   0 8.02663 3.93494   3
  -7   0   7 12.6547 2.94856   2
  -7   7   0 9.85386 4.25807  27
  -7   0  -7 10.7867 3.69857  27
   0   7  -7 6.82301 2.79562  15
  -7   0   7 12.1592 3.07033  13
   0   7   7 7.48937 3.96189   7
   7   7   0 5.47393 3.24132   7
  -7   7   0 8.72376 3.40638   6
   7   0  -7 6.02586 3.31094  24
   7   0  -7 13.4639 3.39191  22
   7   7   0 8.31520 2.86978  24
  -7  -7   0 13.0450 4.35409  23
   7  -7   0 8.08971 2.78837  20
   0  -7   7 8.09083 2.27189  20
   0  -7  -7 13.9727 5.51577  21
  -7   0  -7 12.5473 2.23243  19
  -7   7   0 11.8286 3.13355  18
   7   0  -7 12.4762 2.87820  15
   0  -7  -7 8.82647 3.22340  15
   7   0   7 6.99222 3.58055   8
   0   7  -7 5.23821 2.29621   7
   0   7   7 9.02180 3.57598   8
  -7  -7   0 3.15844 2.62633  12
  -7   7   0 13.0405 2.67461  11
  -7   0  -7 11.7162 2.47900   9
  -7  -7   2 8.73565 3.06716   5
  -7  -2   7 14.0808 3.71446   5
  -7   2   7 7.57383 2.50849   5
  -2  -7   7 12.7492 3.17556   5
  -7  -7  -2 8.30247 2.61983   5
   7   2  -7 13.2549 3.69891   1
  -7  -2   7 11.3315 2.97697   2
   2  -7  -7 7.88005 3.94715   3
   7  -7  -2 7.50956 4.26752   3
  -7   2   7 14.7402 3.01993   2
  -7  -7  -2 9.45339 3.21883   4
   7  -2  -7 7.54027 2.61132  28
  -7   7  -2 15.3203 4.75476  27
  -7   2  -7 8.40938 4.17638  27
  -7   7   2 9.14722 3.47392  27
  -7  -2  -7 3.26710 3.07436  27
  -7   7   2 12.7731 2.76618  13
  -7  -7   2 12.4024 3.28864  12
   2   7  -7 9.87962 2.96407  15
  -2   7  -7 11.2202 3.29332  15
  -2   7   7 0.96938 3.58644  13
  -7   2   7 8.13427 2.94395  13
  -2   7   7 4.71242 3.79129   7
   7   7   2 6.74309 3.39072   7
  -2   7   7 3.13620 2.90455   6
  -7   7  -2 10.3634 3.31772   6
  -2   7  -7 7.69638 4.71944   6
   2   7   7 15.3812 4.53609   7
  -2   7  -7 9.34461 4.41584  25
   7   2  -7 7.77198 3.76897  24
  -2   7  -7 16.7048 5.68647  27
   7  -2   7 9.78618 1.83916  26
  -7  -7  -2 9.16227 3.33557  21
   7  -2  -7 15.1437 3.55837  22
  -7  -7  -2 6.87935 4.18229  23
   7   7  -2 15.5968 3.34375  24
   2  -7   7 9.37829 2.36595  20
  -2  -7  -7 13.7001 5.34164  21
   7  -7   2 14.3705 2.84925  20
  -2  -7   7 14.4456 2.34528  20
  -7   7  -2 12.0866 3.29462  18
  -7   2  -7 17.7258 2.56827  19
   7  -2   7 8.95754 3.30186  17
  -7  -2  -7 13.2471 2.34932  19
   7   2  -7 12.0295 2.63902  15
  -2  -7   7 10.8518 2.57458  16
   7  -2  -7 14.0856 3.17340  15
   2  -7   7 6.33963 2.57078  16
  -2  -7  -7 12.7549 3.24228  15
   7  -7  -2 10.2725 3.44311  15
  -2   7  -7 9.72620 2.17759   7
   2   7  -7 8.90269 2.73950   7
  -2   7   7 4.47556 3.20733   8
   7   7  -2 11.6552 3.56133   7
   2   7   7 12.2346 4.19994   8
   7   2   7 5.02895 4.34116   8
  -7   2  -7 7.10960 2.22625   9
  -7   2   7 8.12885 2.26744  11
   7   7  -2 10.3730 3.63404   8
  -7  -2  -7 13.6984 2.65128   9
  -4  -7   7 15.1261 3.37577   5
  -7  -7   4 11.4406 3.51842   5
  -7  -7   4 11.0660 3.10145   4
  -7   4   7 11.5264 3.23813   6
  -4  -7   7 9.89631 2.90999   4
  -7  -7  -4 9.93225 2.75397   5
  -7  -4   7 14.7249 3.19201   2
   7   4  -7 16.7203 4.25060   1
  -7   4   7 20.7088 3.83921   2
   4  -7  -7 20.2089 4.77732   3
  -7  -7  -4 10.3835 3.40771   4
   7  -7  -4 12.0921 4.60229   3
   7  -4  -7 12.6053 3.11729  28
  -7   4  -7 18.0105 4.93387  27
  -7  -7   4 11.0735 2.70184  14
   4   7  -7 17.8108 3.35890  15
  -4   7   7 19.6653 4.37942  13
  -7   4   7 23.2345 4.10973  13
  -7  -4   7 14.2118 2.92933  14
  -7   7   4 14.5549 3.48812  13
  -7   7  -4 13.7364 3.30071   6
   4   7   7 15.5310 4.61068   7
  -7   7   4 23.5028 4.37794   6
   7   7   4 11.7937 3.98730   7
  -4   7   7 10.7485 3.45124   6
  -7   4  -7 16.0182 4.77707  25
   7   7  -4 13.9254 4.19046  24
  -4   7  -7 20.0672 5.20209  25
  -4   7  -7 11.7996 5.48686  27
   7  -4   7 15.4848 2.16952  26
  -7  -7  -4 12.3253 4.09437  21
  -7  -7  -4 15.7699 5.15254  23
   7  -4  -7 14.6667 4.12619  22
  -4  -7   7 14.8004 2.52639  20
   4  -7   7 17.8073 2.96596  20
  -7  -4  -7 20.0996 3.89054  21
   7  -4   7 9.72822 2.36219  20
  -4  -7  -7 12.2360 5.03857  21
   7  -7   4 13.0731 2.85557  20
   7  -4   7 10.4708 3.51277  17
  -7   4  -7 21.6740 3.09015  19
  -4  -7  -7 5.94023 2.41910  19
  -7  -4  -7 15.2106 2.56989  19
   7  -4  -7 23.5900 3.96718  15
   7   4  -7 10.9613 3.01391  15
  -4  -7   7 19.8984 3.01522  16
   7  -7  -4 16.3135 4.21825  15
   4  -7   7 10.1187 2.85702  16
   4  -7  -7 20.2072 4.24705  15
  -4  -7  -7 17.8499 3.18316  15
   4   7  -7 13.1182 3.39916   7
   7   7   4 16.3866 4.66560   8
   7   7  -4 20.1001 3.94547   7
  -4   7   7 17.1178 3.56784   8
   7   4   7 13.4093 4.91969   8
  -7  -7  -4 14.5885 2.43796   9
  -7   4  -7 18.3922 2.80979   9
  -7   4   7 12.9081 2.74699  11
  -7  -4  -7 7.73581 2.67273   9
  -7   7   4 16.2712 3.39655  11
  -6  -7   7 10.3681 3.28547   5
  -7   6   7 3.85155 3.29843   6
  -7  -6   7 4.75662 3.40984   5
  -7  -7   6 5.85124 3.35788   5
   6  -7  -7 6.20624 4.33018   3
   7  -7  -6 5.25132 4.61007   3
   7  -6  -7 3.09122 4.15816   3
  -7   6  -7 6.88620 5.82379  27
  -7   7  -6 11.5547 5.79542  27
  -6   7  -7 7.66557 5.68258  27
   6   7  -7 9.16334 3.16454  15
   7   6  -7 3.21098 2.80396  15
  -7   6   7 9.07765 3.77291  13
  -7   7   6 4.24919 3.64631  13
  -6   7   7 2.56600 3.49594  13
  -7   7   6 15.1432 3.91458   6
  -6   7   7 5.40346 3.55290   6
   7   7   6 3.90725 3.87639   7
   7   6   7-0.45718 4.04459   7
   6   7   7 0.49188 4.00841   7
  -6   7  -7 11.2304 4.85212  25
   7   7  -6 13.8890 4.45846  24
   7   6  -7 3.34553 4.08933  24
  -7   6  -7 13.4865 5.11381  25
   6  -7   7 5.00299 1.54570  26
   6   7  -7 12.6455 4.33095  24
   7  -6   7 7.51603 1.72443  26
  -6  -7  -7 4.01581 5.65352  23
  -7  -6  -7 8.61201 6.48140  23
  -7  -7  -6 7.76827 4.32165  21
  -7  -6  -7 1.60908 3.98622  21
  -7  -7  -6 8.76438 5.63932  23
   7  -6  -7 11.5017 4.53580  22
   7  -7   6 4.61018 2.39500  20
   7  -6   7 0.57006 2.11469  20
   6  -7   7 8.26394 2.50394  20
  -6  -7  -7 14.1738 4.92673  21
  -6  -7   7 6.96997 1.99187  20
   7  -6   7 4.43629 2.42551  16
  -6  -7  -7 6.10188 2.04261  19
  -7  -7  -6 3.26290 1.80916  19
  -7  -6  -7 8.48606 2.27266  19
   7  -6  -7 8.84506 3.34115  15
   7  -7  -6 6.11373 3.41734  15
   6  -7   7 2.89055 2.29762  16
  -6  -7   7 11.5654 2.84064  16
   7  -7   6 3.58186 2.36741  16
   6  -7  -7 11.7289 3.58530  15
   6   7   7 5.38006 4.43485   8
   7   7   6 11.2076 5.21229   8
   7   7  -6 5.49507 3.57764   7
  -6   7   7 6.33944 3.16140   8
   7   6  -7 5.84304 3.71495   7
   7   6   7 12.6263 5.10854   8
  -6  -7  -7 6.43377 2.41282   9
  -6   7   7 7.13156 3.09695  11
  -7   7   6 2.43688 2.84646  11
  -7   6   7 7.76195 2.75755  11
  -7  -6  -7 11.7857 2.69215   9
  -7  -7  -6 8.35271 2.43892   9
  -8   0   0 1744.58 148.187   5
   0   0  -8 1577.02 147.611   1
  -8   0   0 1767.98 148.054   2
   8   0   0 1817.55 148.271  29
  -8   0   0 1741.32 148.114  14
   0   0   8 1472.14 148.237  13
   0   8   0 1638.09 148.704   6
   0   0  -8 1589.71 148.346  25
   8   0   0 1976.70 147.841  26
   0   0  -8 1616.78 148.222  22
  -8   0   0 1701.83 148.636  23
   0  -8   0 1594.08 148.621  21
   0  -8   0 1655.98 148.126  20
   0   0   8 1676.86 147.944  20
  -8   0   0 1824.97 147.797  18
   0   0  -8 1797.72 147.962  19
   0   0   8 1492.41 148.325  17
   0   0  -8 1684.85 148.027  15
   0   8   0 1789.16 148.536   7
   0   0   8 1823.02 148.394   8
   8   0   0 1656.09 148.466   8
   0   8   0 1564.90 148.007   8
  -8   0   0 1951.76 148.154  10
  -8   1   1 65.8049 6.44200   5
  -8  -1   1 66.8248 6.72737   5
  -8   1  -1 55.4861 6.30611   5
  -8   1  -1 51.4709 6.29003   2
  -8   1   1 54.6677 6.41086   2
   8   1  -1 72.2618 6.63201   1
  -8  -1  -1 55.0684 6.18062   2
  -8  -1   1 61.2596 6.40308   2
   8   1   1 55.0754 6.22415   1
   1   1  -8 65.0918 6.15725   1
  -1  -1  -8 61.7151 5.93332   3
   8   1   1 68.0503 6.58076  29
   1  -8  -1 58.0416 6.54869  30
   8  -1  -1 76.6148 6.77751  29
  -8   1   1 57.0588 7.07596  27
  -8  -1  -1 72.2170 7.42336  27
   1   1   8 55.8482 7.18615  13
   1  -1   8 65.2475 6.91339  13
  -1   1   8 65.8771 7.05246  13
  -8  -1   1 62.4733 6.44544  14
  -8   1   1 62.0784 6.42287  14
  -1  -1   8 54.9896 6.56664  13
  -8   1  -1 56.1701 6.31188  14
  -8  -1  -1 63.7117 6.46112  14
  -1   8   1 66.1502 7.44407   6
   1   8   1 47.8522 6.97358   6
   1  -1  -8 50.3017 6.71372  25
   8   1  -1 84.0662 7.01304  24
  -1  -1  -8 54.4309 6.88330  25
  -1   1  -8 56.7564 7.03198  25
   8  -1  -1 64.4317 5.99452  26
   1   8  -1 49.7265 5.93064  24
   8   1   1 62.2594 5.96379  26
   8   1  -1 76.3995 6.04292  26
   1   1  -8 56.8915 6.75605  25
   8  -1   1 68.4902 6.01727  26
   8  -1  -1 84.7764 6.73221  24
  -1  -8  -1 67.8752 7.48050  21
  -8   1  -1 58.2981 7.06002  23
  -1  -1  -8 61.8241 6.84210  22
   1  -1  -8 55.7029 6.80610  22
  -1   1  -8 60.9094 6.54098  22
   1   1  -8 55.4016 6.62745  22
  -8  -1  -1 57.4010 7.43612  23
  -1  -8   1 59.6215 7.12567  21
  -8  -1   1 74.4221 7.48248  23
   1  -8   1 45.2638 6.69189  21
  -8   1   1 67.8967 6.79194  23
  -1  -8   1 64.3111 6.39320  20
   1  -8   1 62.2384 6.53191  20
   1  -1  -8 61.9885 6.22286  19
  -1   1   8 57.4651 6.23561  20
   1   1   8 50.3493 6.13393  20
  -1  -1   8 62.8097 6.24916  20
   1  -1   8 66.0442 6.31280  20
   1  -8  -1 43.6513 7.07840  21
  -1  -1   8 61.0500 6.85744  17
  -1  -8   1 69.3594 7.01623  16
  -8   1  -1 65.0745 6.13788  18
  -1   1  -8 61.8349 6.15904  19
   1   1  -8 67.1711 6.12974  19
  -1   8  -1 53.6665 6.58055  18
   1  -8   1 77.3857 6.88445  16
  -1  -1  -8 59.8005 6.18210  19
   1  -1   8 49.4530 6.91474  17
  -1   1  -8 62.6057 6.37763  15
  -1  -1  -8 66.9739 6.31595  15
   1   8  -1 57.9389 6.95993   7
  -1   8  -1 51.8606 6.66627   7
   1   8   1 57.3043 7.11427   7
  -1   8   1 65.0988 7.14686   7
   8   1  -1 72.8352 6.50676   7
   1   1   8 64.1820 7.03440   8
  -1   8  -1 51.0198 5.99157   8
   1  -1   8 67.6274 6.81754   8
  -1   1   8 66.9801 6.88488   8
   1   8  -1 64.7363 6.58492   8
  -8   1  -1 65.4377 6.35811  10
  -1   8   1 58.0615 6.48572   8
   1   8   1 53.8052 6.67250   8
  -1  -1   8 58.4515 6.49671   8
  -8  -1   1 70.1757 6.40293  10
  -8  -1  -1 73.5236 6.50549  10
   8   1   1 46.4133 6.84737   8
  -8  -2   0 36.2867 5.01656   5
  -8   0   2 51.2015 5.15993   5
  -8   2   0 48.2764 4.79915   5
  -8   2   0 42.4035 5.09322   2
  -8   0  -2 31.7184 4.61248   2
  -8   0   2 39.2175 4.96594   2
  -8  -2   0 33.9570 4.70267   2
   8   2   0 46.0667 4.96831   1
   0  -2  -8 43.1450 4.73114   3
   8   0  -2 57.5384 5.53253  29
  -8   0  -2 42.1915 5.75106  27
  -8   2   0 40.9697 5.65581  27
   8  -2   0 42.8061 4.89444  28
   8   2   0 50.0848 5.11410  29
  -2   8   0 55.6988 6.46638  27
   8  -2   0 55.7347 5.34784  29
   0  -8  -2 40.1379 5.03014  30
  -2   8   0 31.1270 4.67813  13
   0  -8  -2 33.4410 5.34247  12
   0  -2   8 44.9736 5.00809  13
  -2   0   8 47.9015 5.41479  13
  -8   2   0 35.5552 4.68853  14
   0   2   8 43.0288 5.88777  13
  -8  -2   0 44.8868 5.04248  14
  -2   8   0 51.6224 6.19382   6
   0   8   2 43.9601 5.85235   7
  -8   2   0 40.4452 4.69964   6
   0   8   2 46.6196 5.91069   6
   2   8   0 41.7875 5.64138   7
   0   2  -8 41.4381 5.46731  25
   2   0  -8 38.8500 5.32154  25
   8   0   2 47.5436 4.48635  26
   0  -2  -8 38.6192 5.50539  25
   8   0  -2 53.7809 4.50770  26
   8   0  -2 47.7024 5.14625  24
   8   2   0 51.9811 4.56309  26
  -2   0  -8 36.2132 5.93640  25
   2   8   0 48.2187 4.60149  24
   8  -2   0 46.6834 4.49640  26
  -8   2   0 37.2966 4.98923  23
   0  -2  -8 39.6495 5.62930  22
  -2   0  -8 31.3512 4.92607  22
  -2  -8   0 43.6046 5.78636  21
   2   0  -8 32.4821 5.17435  22
  -8  -2   0 38.4619 5.91990  23
  -8   0  -2 46.0485 6.13080  23
   0   2  -8 39.5254 5.03447  22
   0  -8   2 37.4361 5.25167  21
   0  -2   8 47.9682 4.75789  20
   0  -8  -2 41.0652 6.13330  21
  -2  -8   0 43.5316 4.77908  20
   2  -8   0 32.4159 5.33996  21
   0  -8   2 44.9054 4.99385  20
  -2   0   8 45.4656 4.80505  20
   2   0   8 40.3709 4.61718  20
   0  -2  -8 47.7080 4.80344  19
  -2   0   8 44.8465 5.31218  17
   0  -2   8 51.1836 5.62742  17
  -8   2   0 41.1781 4.78019  18
   2  -8   0 47.5998 5.22340  16
   2   0  -8 51.0639 4.70615  19
  -2   0  -8 49.3028 4.80653  19
   0   8  -2 44.8739 5.09809  18
   0   2  -8 50.0866 4.69781  19
   0  -8   2 38.3414 5.10118  16
   0   2  -8 50.7759 5.05610  15
   2   0  -8 46.7462 5.06629  15
  -2   0  -8 34.8896 4.65229  15
   0  -2  -8 51.2217 5.03819  15
   0   8  -2 44.1410 5.33391   7
   0   2   8 37.9606 5.36625   8
   8   2   0 47.4955 5.02582   7
  -2   8   0 42.0335 5.42661   7
   8   0   2 32.5797 5.36328   8
   8   0  -2 46.6182 4.88279   7
   0   8   2 38.9996 5.27425   8
   8   2   0 43.9132 5.66760   8
   0   8  -2 33.8316 4.70295   8
   2   8   0 42.1837 5.34506   8
   0  -2   8 44.9153 5.08351   8
  -2   0   8 47.9953 5.22893   8
  -8   0   2 54.8234 4.94384  10
  -2   8   0 42.3798 4.53082   8
  -8   0  -2 47.9230 4.92158  10
  -8  -2   0 53.0622 4.93275  10
   2   0   8 44.6797 5.52745   8
  -8   2   2 4.75727 1.72060   5
  -8   2   2 2.19740 1.83277   6
  -2  -8   2 6.89331 2.00116   5
  -8  -2  -2 0.28170 2.33436   5
  -8   2  -2 4.62388 1.93346   5
  -8   2  -2 4.23433 1.58457   6
   2   2  -8 5.38637 2.09127   1
   8   2  -2 3.28803 2.26027   1
  -8  -2   2 1.10188 2.06025   2
  -8  -2  -2 0.50446 1.87801   2
  -8   2   2 4.28680 2.47677   2
  -8   2  -2 2.34643 2.16126   2
  -8   2  -2 4.16092 3.30379  27
   8   2  -2 4.88383 2.35976  29
   8  -2  -2 5.81817 2.34208  29
   8  -2   2 1.96422 1.94237  28
   8  -2  -2 4.87241 2.03438  28
  -2   2  -8 6.13859 2.83205  27
  -8   2   2 3.65717 2.52157  27
   8   2   2 2.60207 2.05964  29
  -8   2  -2 5.75462 1.91458  14
  -2   8   2 7.65733 2.98890  13
  -2  -8  -2 1.04952 2.41323  12
  -8   2   2 4.44610 1.91645  14
  -2  -2   8 5.76022 2.23474  13
  -2   2   8 4.41550 2.61574  13
  -8  -2   2 4.32109 2.02171  14
   2   8  -2 10.1027 2.97667   7
  -2   8   2 0.82223 2.94893   6
  -2   8   2 3.33155 2.90096   7
   2   8   2 9.21907 3.09909   6
  -2   8  -2 0.43104 3.63973   6
  -2   8  -2 9.23071 2.57839   7
   2   8  -2 4.87632 2.02644  24
  -2   8  -2 6.28843 4.72809  27
  -2   8   2 6.56185 2.95320  27
  -2  -2  -8 2.91733 3.34010  25
   2  -2  -8 4.98091 2.64546  25
   8   2   2 2.65415 1.37274  26
   8  -2   2 2.24097 1.19516  26
   8   2  -2 4.23320 1.26116  26
   2  -8   2 8.74449 2.53904  21
  -8  -2  -2 2.36632 4.08850  23
   2   2  -8 1.54904 2.18579  22
  -2  -8   2 3.47353 2.53087  21
   8  -2  -2 1.57669 1.87715  24
   8   2  -2 2.43207 2.08840  24
  -2   2  -8 4.08285 2.08332  22
  -8   2  -2 6.71785 3.14542  23
  -2  -8  -2 4.06604 3.23711  21
   2   2   8 6.09740 1.67281  20
  -2  -8   2 3.64487 1.67743  20
   2  -2   8 4.09534 1.55182  20
   2  -8  -2 5.60315 3.39796  21
  -2   8  -2 5.93773 2.35716  18
  -8  -2  -2 3.14513 0.97925  19
   2  -2  -8 4.03923 1.69785  19
  -2  -2  -8 4.29305 1.65833  19
   2   2  -8 4.25177 1.35501  19
  -2   2  -8 4.14762 1.70064  19
  -2   2  -8 5.20002 1.92466  15
  -2  -2  -8 1.30433 1.70273  15
   2   2  -8 4.12755 2.18335  15
   2  -2  -8 5.62718 2.23617  15
   2  -8   2 8.74038 2.20771  16
   8   2   2-0.78294 3.29254   8
  -2   2   8 0.81707 2.35780   8
  -2  -2   8 5.31422 2.18286   8
   2   8   2 1.00627 2.90718   8
   2  -2   8 4.24080 2.44512   8
   2   2   8 3.41438 2.94510   8
   8   2  -2 3.29848 1.99937   7
  -2   8   2 3.91179 2.14768   8
  -8  -2   2 0.36694 1.67065  10
   2   8  -2 6.96730 2.30688   8
  -8  -3  -1 4.07457 2.31177   5
  -8   3   1 7.22856 2.23662   6
  -8  -1   3 4.38635 2.44518   5
  -8   1  -3 8.27312 2.47488   5
  -8   3   1 9.91837 1.93696   5
  -3  -8   1 4.06236 2.03490   5
   3   1  -8 8.93540 2.45509   1
   8   3  -1 9.46543 2.67374   1
   1  -3  -8 7.38678 2.44956   3
  -8   1  -3 6.05865 2.10235   2
  -3  -8   1 3.94104 3.08344   4
  -8   3   1 10.3109 2.80610   2
  -8   3   1 3.41246 2.69822  27
   8  -3   1 8.39137 2.37301  28
  -1  -8  -3 12.7471 2.31513  30
   3   1  -8 7.15250 1.38246  28
   8   3  -1 14.4145 2.63449  29
   8  -1  -3 12.0466 2.85068  29
   3  -8  -1-0.87062 2.49813  30
  -8   1  -3 8.86773 3.71662  27
  -1  -8  -3 3.73795 2.42743  12
  -8  -1   3 3.65960 2.04605  14
  -3   1   8 8.32162 3.07779  13
  -8   3   1 4.05369 1.89563  14
  -3   8  -1 12.5369 3.95097   6
  -1   8   3 12.3301 3.65725   6
  -3   8  -1 9.95769 2.74794   7
   3   8   1 1.49624 2.88371   7
  -1   8   3 10.3626 4.01741   7
   8  -1  -3 6.83335 1.49307  26
  -3   8  -1 6.29914 3.90043  27
  -1   3  -8 5.26603 3.14558  27
  -3  -1  -8 8.93953 3.97432  25
   1  -3  -8 4.88534 2.86768  25
   8   1   3 6.46527 1.65332  26
  -8   1  -3 13.2075 4.23157  23
  -1   3  -8 5.07845 2.18884  22
   8  -1  -3 2.33260 2.18413  24
   1  -3  -8 8.34035 3.53979  22
  -3  -8   1 7.23953 3.19533  21
   1  -8   3 3.87624 2.30007  21
   8   3  -1 15.0864 2.91223  24
   1  -8   3 6.42108 2.13832  20
  -1  -8  -3 10.7798 3.96539  21
  -1  -3   8 4.29412 1.93890  20
   3  -8  -1 7.16576 3.26402  21
   3  -1   8 6.43641 1.77559  20
  -3  -8   1 6.75723 1.71161  20
  -3   1   8 9.65541 2.61068  17
   3  -1   8 6.19273 3.09941  17
  -3  -1  -8 10.3042 1.97548  19
  -3   8  -1 2.93746 2.28979  18
   3   1  -8 8.50005 1.64805  19
   1   8  -3 7.96983 2.08510  18
  -1   3  -8 6.38998 1.72484  19
   3   1  -8 6.13317 2.26239  15
  -1   3  -8 6.40921 2.26437  15
  -3  -1  -8 4.75129 1.88828  15
   1  -8   3 8.83339 2.38165  16
   1   3   8 7.75094 3.32863   8
   3  -1   8 5.32594 2.77386   8
   3   8   1 3.73511 2.96857   8
   1   8  -3 3.14474 2.67064   7
  -1  -3   8 6.56069 2.27370   8
   8   1   3 4.14634 3.06829   8
   8   3  -1 7.74816 2.55447   7
  -1   8   3 8.15766 2.87788   8
  -3   1   8 8.58365 2.91853   8
  -8   1  -3 10.8172 2.41458  10
  -8  -1   3 7.61281 1.93693  10
  -3   8  -1 4.74878 2.15495  11
  -1  -8   3 6.90860 2.08522   5
  -8  -3   1 7.01479 2.52567   5
  -8  -1  -3 8.32278 2.48312   5
  -8   1   3 8.39945 2.07968   5
  -8   3  -1 8.09084 2.05509   5
  -8   3  -1 5.07595 2.08703   6
   8   1  -3 4.54505 2.62641   1
  -8   3  -1 7.85693 2.64407   2
   8   3   1 3.88930 2.13923   1
  -1  -3  -8 10.9322 2.62005   3
  -8  -1  -3 6.73950 1.83200   2
   8  -3  -1 5.64960 2.33020  28
  -8  -1  -3 8.04762 3.43027  27
  -8   3  -1 6.32886 3.57001  27
   3  -1  -8 8.72527 1.69059  28
   8   3   1 11.7960 2.25108  29
   8  -3  -1 7.10862 2.46427  29
  -3  -8  -1 6.87221 2.70032  12
  -8   3  -1 6.14158 1.95589  14
  -8  -3   1 11.0155 2.27581  14
   1  -8  -3 3.10297 2.46189  12
  -3  -1   8 7.50164 2.48421  13
  -1   3   8 13.1696 3.70332  13
  -3   8   1 3.51566 2.20250  13
   8   3   1 8.91239 2.48693   7
  -1   8  -3 3.87109 3.45448   6
  -3   8   1 9.36016 3.97304   6
  -3   8   1 11.2130 3.13377   7
   1   8   3 3.75859 3.17401   6
  -1   8  -3 7.66658 2.56181   7
  -3   1  -8 4.68118 3.88663  25
  -1  -3  -8 7.28463 3.52655  25
  -3   8   1 8.67861 3.32388  27
   3  -1  -8 4.08593 2.85765  25
   8  -1   3 7.06797 1.53244  26
  -3  -8  -1 5.58197 3.14147  21
   1   3  -8 7.40197 2.49946  22
   3   8  -1 8.20008 2.19534  24
  -3   1  -8 4.29694 2.26200  22
   8   1  -3 8.38495 2.44514  24
  -8   3  -1 7.05940 2.54504  23
  -8  -1  -3 6.37881 4.09131  23
  -8  -3   1 6.45845 3.51270  23
  -3  -8  -1 2.83709 3.15591  23
   3  -1  -8 14.4872 3.38590  22
   3   1   8 5.89099 1.72705  20
   1  -3   8 6.99872 1.90643  20
  -3  -8  -1 7.63745 1.84624  20
   3  -8   1 7.44865 2.30971  20
   1  -8  -3 1.78831 3.69944  21
  -1  -8   3 6.85489 2.02332  20
  -8  -1  -3 9.50698 1.42868  19
   3  -1  -8 5.63369 1.75348  19
  -8   3  -1 8.20426 2.11983  18
  -1   8  -3 10.3906 2.47491  18
  -1  -3  -8 6.80468 1.97885  19
  -3   1  -8 5.54218 1.84820  19
  -3  -1   8 5.19689 2.32265  17
   1   3  -8 5.18117 1.65899  19
   1  -3   8 8.67414 2.96332  17
   1   3  -8 5.16099 2.15537  15
  -1  -3  -8 14.1993 2.39773  15
   3  -1  -8 4.69366 2.41303  15
   3  -8   1 10.2667 2.32304  16
  -1  -8   3 10.0212 2.40881  16
  -3   1  -8 7.96407 2.05602  15
   3   1   8 8.17596 3.39654   8
  -3  -1   8 4.89958 2.37699   8
   1  -3   8 4.99783 2.11773   8
   8   1  -3 13.1647 2.42041   7
   1   8   3 7.11470 3.03435   8
  -1   8  -3 4.76666 1.63828   8
   8   3   1 4.74095 3.14847   8
   3   8  -1 4.30326 2.81071   8
  -3  -8   3 131.749 12.0289   4
  -8   3   3 127.295 10.9684   5
  -8  -3  -3 128.364 11.6357   5
  -3  -8   3 114.139 11.3252   5
   3   3  -8 123.259 11.4839   1
   3  -8  -3 108.212 12.3479   3
   8   3  -3 112.405 11.5782   1
  -3   3   8 157.826 11.6619   2
   8  -3  -3 127.735 11.6789  29
  -8   3  -3 109.894 12.3222  27
  -3   3  -8 113.840 11.9258  27
  -8   3   3 92.8353 11.3306  27
  -3   8   3 122.087 11.5509  27
   8   3   3 115.409 11.1359  29
   8  -3   3 114.996 11.2885  28
  -3   8   3 90.7775 11.5726  13
  -3   3   8 135.500 12.2059  13
   3  -8  -3 107.800 11.4108  12
  -3  -3   8 131.979 11.3412  13
  -8  -3   3 115.477 11.2752  14
  -3  -8  -3 103.872 11.7577  12
   3   8   3 97.5892 11.7247   6
  -3   8  -3 124.734 12.6339   6
  -3   8   3 123.466 12.2843   6
  -3   3   8 119.318 11.1373   6
  -8   3  -3 96.0853 10.7509   6
  -3  -3  -8 90.4783 12.0289  25
   8  -3  -3 112.741 11.2257  24
  -3   8  -3 118.191 11.3046  25
   3   8  -3 111.591 11.4689  24
   3  -3   8 125.693 10.5989  26
   8   3  -3 130.139 11.9140  24
   8  -3   3 129.289 10.9449  26
  -3   3  -8 119.687 12.3211  25
   3  -8  -3 98.0814 12.1763  21
  -3  -8  -3 82.0601 11.7497  23
   3  -3  -8 136.921 12.2312  22
  -3  -8  -3 109.852 12.4601  21
  -3   3  -8 104.976 10.9201  22
  -8   3  -3 123.402 12.2236  23
  -3  -8   3 120.255 10.9719  20
   3  -8   3 120.147 11.4476  20
  -3  -3   8 106.804 11.0570  20
   3  -3   8 122.554 11.1828  20
   3  -8   3 144.043 11.6264  16
  -3  -8   3 130.459 11.7771  16
   3  -3   8 118.038 11.8830  17
  -3  -3   8 99.4231 10.8974  16
  -8  -3  -3 123.917 10.6159  19
  -3   3  -8 126.534 11.1717  19
  -3   8  -3 110.138 11.5647  18
   3   3  -8 140.485 11.6119  15
  -3   3  -8 117.669 11.3389  15
   3  -3  -8 155.486 11.8608  15
  -3  -3  -8 111.274 10.9787  15
   3   8   3 135.063 12.4342   7
  -3   8  -3 114.074 11.1595   7
   3   3   8 115.721 11.6849   7
   8   3  -3 106.930 11.4289   7
  -3   8   3 130.658 12.1460   7
   3   8  -3 115.812 11.7433   7
  -3   8   3 115.229 11.0637   8
  -3   3  -8 121.675 11.2203   9
  -8  -3   3 121.765 11.0466  10
  -3   8  -3 110.944 10.9841  11
   3   8   3 122.615 12.2569   8
  -8   3   3 122.306 11.2396  11
  -3   3   8 153.396 11.9269   8
   3   3   8 113.111 12.3152   8
  -8   3  -3 118.314 11.2216  10
   8   3   3 98.5708 12.0341   8
  -8  -4  -2 40.1947 5.40227   5
  -4   2   8 44.0603 5.67798   5
  -4  -8   2 43.0217 5.25630   5
  -8   4   2 49.5872 4.63123   5
  -8  -2   4 35.2361 5.64372   5
  -4   2   8 51.4319 5.40132   2
  -8  -2   4 46.9897 5.26916   2
  -8   4   2 38.4295 5.82100   2
  -4  -8   2 41.0508 5.65397   4
   4   2  -8 45.6400 5.42846   1
   2  -4  -8 44.7205 5.54127   3
   8   4  -2 33.9582 5.39850   1
   4  -8  -2 43.5708 6.66134   3
  -8   2  -4 41.2578 4.87090   2
   8  -4   2 44.8727 5.54870  30
  -8   4   2 36.6223 5.45738  27
  -2  -8  -4 48.5613 4.83658  30
   8  -2  -4 46.5222 5.61714  29
  -8   2  -4 52.7169 6.53299  27
   8  -4   2 43.1848 5.22694  28
  -2   8   4 41.9053 5.06706  27
   8  -2  -4 51.4740 5.34745  28
  -2  -8  -4 53.6340 6.04476  12
  -2   8   4 25.3428 5.65992  13
  -4   2   8 52.5921 5.94624  13
  -8  -2   4 48.0544 5.14843  14
  -8   4   2 37.1904 4.97647  14
  -4   2   8 43.9951 4.88573   6
  -4   8  -2 41.7025 6.37325   6
  -2   8   4 44.9029 6.24659   6
  -8   4   2 42.6750 5.35563   6
  -2   8   4 46.3303 6.10638   7
  -2   4  -8 40.5719 6.15412  27
   8   4  -2 53.0897 5.95795  24
  -4  -2  -8 38.3555 6.38917  25
  -2   4  -8 45.4393 6.50431  25
  -4   8  -2 35.1535 6.72911  27
   8  -2  -4 35.2687 5.14352  24
   2  -4  -8 45.8771 6.45959  22
   8  -2  -4 44.3105 5.35784  22
  -2   4  -8 44.9599 4.90627  22
  -8  -4  -2 48.0797 6.76367  23
   8  -4   2 47.7206 4.99111  20
   4  -2   8 44.4497 4.86844  20
  -2  -8  -4 42.6529 6.57490  21
   4  -8  -2 31.5088 5.70747  21
  -2  -4   8 41.3313 4.89632  20
  -4  -8   2 42.2569 4.57223  20
   4  -2   8 54.7084 6.11557  17
  -4   8  -2 38.5840 5.48626  18
  -2  -4   8 36.1204 4.78272  16
  -8   2  -4 40.1932 4.68343  19
  -2   4  -8 42.4227 4.86756  19
  -4  -2  -8 46.7289 5.00548  19
  -4   2   8 51.8936 5.22917  17
   2  -8   4 52.7902 5.58692  16
  -4  -2  -8 49.2045 4.84539  15
   4   2  -8 46.4248 5.30610  15
  -2   4  -8 48.9927 5.41813  15
   2   8  -4 46.0174 5.65324  15
   2  -4  -8 50.1701 5.80193  15
   4   8   2 51.8769 6.31118   7
   4   8   2 35.0972 5.92834   8
   8   2   4 36.9752 6.20112   8
   2   4   8 46.6737 5.90727   7
   8   4  -2 48.6142 5.64116   7
   2   8  -4 48.5766 5.65112   7
   2   4   8 45.5230 6.36836   8
  -2   4  -8 52.0344 4.98354   9
  -4   8  -2 40.2497 5.00375  11
  -8   4   2 47.5542 5.17045  11
  -4   2   8 53.5860 5.62160   8
  -8  -2   4 55.6543 5.01223  10
  -8   2  -4 54.5737 5.23861  10
  -2   8   4 49.0439 5.45038   8
  -4   0   8 473.884 38.6856   5
   0  -8   4 380.226 37.6000   5
  -8   0   4 373.329 37.8240   5
  -4  -8   0 386.611 37.6468   5
  -8  -4   0 355.423 37.8934   5
  -8   4   0 508.774 37.6318   5
  -8   0  -4 489.658 38.1594   5
   8   4   0 411.589 37.8146   1
  -4   0   8 387.886 37.5925   2
  -8   0   4 421.003 37.8577   2
   0  -4  -8 421.278 37.8312   3
  -8   4   0 432.151 38.1469   2
  -8   0  -4 382.310 37.3339   2
  -8   4   0 385.290 38.2632  27
   8   4   0 459.562 37.7785  29
  -8   0  -4 398.491 38.4473  27
   8  -4   0 429.986 37.9178  28
  -4   8   0 465.765 38.7706  27
   0   4  -8 470.180 38.8327  27
   4   0  -8 426.522 37.3463  28
  -4  -8   0 454.753 38.5586  12
   0  -8  -4 416.745 38.1671  12
   0   4   8 362.567 38.5405  13
  -8   0   4 424.138 37.7871  14
  -4   0   8 442.504 38.0494  13
  -8   4   0 333.593 37.5080  14
   0   8   4 421.078 38.4303   6
  -4   8   0 440.542 38.7599   6
  -8   4   0 395.927 37.7168   6
   4   8   0 563.879 38.0098  24
  -4   0  -8 352.539 38.3438  25
   0  -4  -8 373.366 38.1036  25
   8   0   4 477.963 37.4980  26
   8   0  -4 410.709 38.0304  24
   0  -8  -4 429.902 38.9892  21
   4   0  -8 454.408 38.2427  22
   8   0  -4 444.727 37.8021  22
  -8   4   0 420.072 37.4715  23
  -8  -4   0 380.441 38.6846  23
  -4  -8   0 399.873 38.4569  23
  -8   0  -4 466.440 39.3292  23
  -4  -8   0 446.134 38.6140  21
   0  -8   4 470.166 37.8424  20
  -4  -8   0 461.995 37.4080  20
   4  -8   0 388.628 37.9841  20
   4   0   8 421.803 37.4856  20
   0  -4   8 442.741 37.7073  20
  -4   0   8 420.932 37.6668  17
   0  -8   4 466.633 37.9832  16
  -8   0  -4 466.697 37.4284  19
   0   8  -4 417.845 37.8589  18
  -4   8   0 436.462 38.3107  18
   0   4  -8 457.214 37.5606  19
   4  -8   0 467.624 37.9690  16
  -8   4   0 423.746 38.0305  18
   4   0  -8 459.320 37.9414  15
  -4   0  -8 443.812 37.5195  15
   0  -4  -8 440.649 37.9598  15
   0   4   8 411.552 38.1815   7
   8   4   0 414.377 38.0126   7
   0   8  -4 445.944 37.9320   7
  -4   8   0 462.424 37.9431   7
   0   8   4 466.720 38.6921   7
   4   8   0 429.799 38.3786   7
  -4   0   8 474.257 38.0321   8
  -4   0  -8 477.566 38.0570   9
   8   4   0 368.619 38.3149   8
   4   8   0 346.708 38.0897   8
  -4   8   0 376.955 37.9242  11
   8   0   4 364.066 38.1636   8
   0   8   4 435.520 38.2703   8
   0  -4   8 425.933 37.6724   8
   4   0   8 375.746 38.0167   8
  -8   2   4 42.0443 4.75502   5
  -4  -2   8 65.1508 6.47270   5
  -2  -8   4 41.5746 5.08901   5
  -8  -4   2 38.5237 5.51495   5
  -8  -2  -4 54.8173 5.63511   5
  -4  -2   8 38.4522 4.88258   2
  -8  -2  -4 30.0131 4.39960   2
   8   2  -4 54.5783 5.99314   1
  -8   2   4 51.6348 5.47147   2
  -2  -8   4 36.5924 5.58607   4
   8   4   2 45.6250 4.82060  29
   8  -4  -2 55.5379 5.54265  29
   4  -2  -8 43.2961 4.71222  28
  -2   8  -4 71.1090 9.40767  27
  -4   8   2 49.7785 5.85739  27
  -8   4  -2 46.7735 6.58470  27
  -4   2  -8 34.1342 5.76052  27
  -8  -2  -4 39.8492 5.89052  27
   8  -4  -2 46.7105 5.40752  28
   8  -2   4 43.8147 4.96747  28
  -8  -4   2 40.5784 5.07913  14
   2  -8  -4 46.1628 5.45468  12
  -4   8   2 40.5388 5.29498  13
  -8  -4   2 43.2446 4.64063  12
  -4  -2   8 52.5769 5.35247  13
  -8   4  -2 41.5042 4.76721  14
  -2   4   8 45.0618 6.13149  13
  -2   8  -4 51.4296 7.06908   6
   2   8   4 44.8709 6.04964   6
   4   2   8 42.7297 5.35692   7
  -8   4  -2 39.8875 4.82545   6
  -4   8   2 35.4485 6.05305   6
  -8   2   4 46.7037 5.19130   6
   2   8   4 44.7337 6.25897   7
   4  -2  -8 44.8536 5.32139  25
  -2  -4  -8 37.3475 6.13501  25
   2  -4   8 42.3846 4.09464  26
   4   8  -2 55.2721 5.42230  24
  -4   2  -8 44.3969 6.44763  25
   8   2  -4 43.6482 5.59890  24
   4  -2  -8 51.5912 6.14625  22
  -8   4  -2 58.3963 5.69322  23
  -8  -2  -4 39.1631 7.14758  23
  -4  -8  -2 32.5612 5.80124  23
  -4  -8  -2 41.6936 4.59008  20
   2  -8  -4 38.2530 6.63833  21
   4  -8   2 42.2476 5.26205  20
   4   2   8 38.2035 4.57177  20
  -4  -2   8 51.6457 5.05579  20
   2  -4   8 50.3397 5.02193  20
  -2  -8   4 44.0435 4.82631  20
   4  -8   2 49.6241 5.19428  16
  -4  -2   8 33.1766 4.44839  16
  -2   8  -4 44.2038 5.32717  18
  -8   4  -2 48.6907 5.25675  18
  -8  -2  -4 42.1310 4.42253  19
  -4   2  -8 49.1704 4.94612  19
  -2  -8   4 43.1234 5.21842  16
  -2  -4  -8 38.3978 4.92605  15
   2   4  -8 47.2652 5.25830  15
  -4   2  -8 43.0693 4.91531  15
   2  -8  -4 45.7177 6.08787  15
   4  -2  -8 50.5945 5.36836  15
  -2   8  -4 51.1110 5.11354   7
   8   4   2 44.4838 5.52776   7
  -2   4   8 45.3738 5.82697   8
   8   4   2 41.5077 6.08005   8
  -4   8   2 50.3292 5.74213   7
   8   2  -4 48.2806 5.43505   7
   2   8   4 42.7645 6.17232   8
   4   2   8 33.8615 6.12805   8
  -2   8  -4 39.3048 4.44206  11
   4   8  -2 38.1445 5.59191   8
  -4   2  -8 47.4529 5.05107   9
  -8  -2  -4 48.6808 4.92422   9
  -8  -4  -4 994.240 84.1835   5
  -4  -4   8 1082.83 84.7530   5
  -4  -8   4 975.363 84.0973   5
  -8  -4   4 905.192 84.5302   5
  -8   4   4 955.893 83.3636   5
  -4  -8   4 945.569 84.2053   4
  -4   4   8 1135.89 84.2834   2
  -8   4   4 1123.79 84.4762   2
   4  -8  -4 1047.33 84.9464   3
   8   4  -4 983.542 84.1437   1
   4   4  -8 989.089 84.0935   1
   8  -4  -4 1042.44 84.2679  29
   8   4   4 1067.18 83.6957  29
  -8   4  -4 947.917 84.8538  27
  -4   4  -8 849.114 84.4592  27
  -8   4   4 804.509 83.7365  27
   8  -4   4 909.883 83.8292  28
   8  -4  -4 1044.24 84.0779  28
  -4   8   4 874.239 84.2637  13
  -8   4   4 1120.18 84.4793  13
  -4   4   8 1110.55 84.8679  13
  -8  -4   4 980.994 83.8178  14
   4   8   4 876.219 84.1816   6
  -4   8  -4 921.784 84.7719   6
  -4   4   8 959.272 83.8496   6
  -8   4   4 1016.30 84.1650   6
  -8   4  -4 821.152 83.3159   6
  -4   8   4 1015.50 84.7840   6
   8   4  -4 946.526 84.4771  24
   4   8  -4 886.863 84.1995  24
  -4   4  -8 984.575 84.9788  25
   4  -4   8 973.651 83.2201  26
   8  -4   4 973.719 83.4994  26
  -4  -4  -8 1109.70 85.2730  21
   4  -4  -8 1024.71 84.6611  22
   4  -8  -4 899.226 84.7396  21
  -4  -8  -4 700.301 84.2341  23
  -8  -4  -4 850.512 85.1233  23
  -4  -8  -4 963.291 85.2106  21
  -8  -4  -4 897.520 83.8442  21
   4  -8   4 1012.69 84.1034  20
  -4  -8   4 940.776 83.4910  20
  -4  -4   8 917.938 83.6803  20
   4  -4   8 998.271 83.8079  20
   4  -4   8 986.486 84.4788  17
  -4  -8   4 1126.35 84.4044  16
  -4  -4  -8 966.746 83.8299  19
  -4   8  -4 978.639 84.2843  18
   4  -8   4 973.915 83.9617  16
  -4   4  -8 1005.34 83.8251  19
  -4  -4   8 866.610 83.5324  16
  -8  -4  -4 1004.31 83.3389  19
   4   4  -8 975.929 84.0113  15
  -4   4  -8 1012.25 84.0031  15
   4   8  -4 1016.10 84.1704  15
   4  -4  -8 1218.32 84.5476  15
   4  -8  -4 890.432 84.4588  15
  -4  -4  -8 883.143 83.5077  15
   4   8   4 921.938 84.7131   7
   8   4  -4 910.894 84.1012   7
   4   4   8 808.566 84.0319   7
  -4   8   4 1036.04 84.4869   7
   4   8  -4 923.627 84.2236   7
  -4  -8  -4 1011.97 83.4221   9
  -4   4  -8 1058.82 83.8447   9
  -4   4   8 1162.66 84.3898   8
   4   8   4 896.300 84.7564   8
  -8  -4  -4 987.279 83.7486   9
   8   4   4 879.703 84.7589   8
  -8   4   4 951.992 83.8683  11
  -4   8  -4 792.617 83.3908  11
  -8   4  -4 949.379 83.7744  10
   4   4   8 957.105 84.8574   8
  -8  -5  -3 36.1073 4.93782   5
  -8  -5  -3 32.9488 4.68073   4
  -5  -8   3 32.8758 4.80989   5
  -5   3   8 37.2135 4.73788   5
  -8  -3   5 41.3010 5.80218   5
  -5   3   8 28.4694 4.34200   6
  -3  -5   8 36.7393 5.33480   5
  -5   3   8 41.3456 5.05461   2
   5   3  -8 39.1624 5.12403   1
  -8  -3   5 30.5473 4.73190   2
  -5  -8   3 38.8174 5.37818   4
   3  -5  -8 33.6265 5.31930   3
   8   5  -3 27.7641 5.07711   1
   5  -8  -3 41.1333 6.30194   3
   8  -5   3 33.9955 4.87548  28
   8  -3  -5 37.6651 4.84674  28
  -8   5   3 28.3275 4.72409  27
  -8   3  -5 35.6367 6.09551  27
  -3   5  -8 37.8309 4.94948  15
  -5   3   8 51.1125 5.71926  13
   3   8  -5 33.4305 4.89794  15
  -3   8   5 38.0521 5.84869  13
  -8  -3   5 34.1115 4.50438  14
  -3   8   5 39.5584 5.75625   6
   5   8   3 35.9204 5.70887   7
  -3   8   5 46.8729 6.12510   7
  -5   8  -3 39.8832 6.22722   6
   3   5   8 35.4472 5.43870   7
  -3   5  -8 38.6062 6.42035  27
  -5   8  -3 53.6787 7.58951  27
   8   5  -3 48.7801 5.78461  24
   5  -3   8 38.4422 3.86383  26
   8  -3  -5 26.6065 4.62553  24
  -3   5  -8 40.7737 6.46681  25
  -8  -5  -3 33.2692 6.84459  23
   3  -5  -8 35.9196 6.07485  22
   8  -3  -5 34.6272 5.08358  22
   3  -8   5 39.7540 4.76096  20
  -5  -3  -8 41.8810 6.40045  21
   8  -5   3 43.1980 4.54964  20
   5  -3   8 37.5673 4.39243  20
   5  -8  -3 45.0504 6.06817  21
  -3  -8  -5 32.5885 6.36783  21
  -3  -5   8 39.9522 4.37360  20
  -5  -8   3 39.9331 3.97302  20
  -5  -3  -8 40.2298 4.52811  19
  -3  -5   8 34.3850 4.42506  16
  -3   5  -8 38.5068 4.41014  19
  -5   8  -3 32.8476 4.96624  18
   5  -3   8 42.8679 5.55681  17
   5  -8  -3 37.3233 5.55169  15
  -3  -8  -5 28.3675 4.92592  15
  -5  -3  -8 32.5738 4.01799  15
   5   3  -8 32.4933 4.80736  15
   3  -8   5 31.2226 4.61406  16
   3  -5  -8 53.3374 5.66901  15
  -3   8   5 37.5402 4.95918   8
   5   8   3 32.9744 5.70764   8
   3   5   8 38.0183 6.17840   8
   8   3   5 34.3924 6.26069   8
   8   5  -3 38.3358 5.09829   7
   3   8  -5 41.0778 5.14288   7
  -5  -3  -8 44.2918 4.95189   9
  -3   5  -8 35.1395 4.21534   9
  -5   3   8 42.1533 5.09336   8
  -8   5   3 42.7010 4.71962  11
  -5   8  -3 31.7419 4.20970  11
  -8   3  -5 35.5730 4.57593  10
  -5   1   8 22.3235 4.19083   5
  -8  -5  -1 17.1942 3.36509   4
  -5  -8   1 20.1708 3.39541   5
  -8  -5  -1 14.1482 3.38518   5
  -8  -1   5 27.3648 4.14833   5
  -8   5   1 25.9165 2.87586   5
  -8  -1   5 26.0287 3.68543   2
   5   1  -8 21.3367 3.85210   1
  -5   1   8 19.7121 3.40593   2
  -5  -8   1 15.6730 4.15701   4
   1  -5  -8 28.4326 4.26568   3
   5  -8  -1 24.1659 5.23899   3
   8  -5   1 19.4844 3.88801   3
   8  -5   1 20.8648 3.73414  28
  -8   5   1 26.0169 4.58128  27
  -5   8  -1 30.6718 5.56268  27
  -8   1  -5 23.6694 4.90975  27
  -1   5  -8 22.5797 3.64675  15
  -8  -1   5 22.2096 3.40880  14
  -5  -8   1 23.7103 4.18464  12
  -8   5   1 19.5275 3.04849  14
   1   8  -5 29.2071 3.94123  15
  -5   1   8 29.4106 3.91098  13
  -1   8   5 21.1308 4.71889  13
   1   5   8 19.0286 4.02738   7
  -8   5   1 19.7098 3.64857   6
   5   8   1 26.2199 4.50907   7
  -5   8  -1 29.6042 5.24401   6
  -1   8   5 16.4278 4.00918   6
  -1   8   5 25.1101 5.02685   7
   8  -1  -5 23.2734 3.97491  24
  -1   5  -8 21.9429 5.13650  25
  -1   5  -8 17.4047 4.90384  27
  -5  -1  -8 16.2325 4.91749  25
   8  -1  -5 22.2537 3.63237  22
   5   1  -8 19.8697 4.01625  22
  -8  -5  -1 11.9625 4.43458  23
   8  -5   1 21.1632 3.31320  20
  -1  -8  -5 27.6484 5.66184  21
  -5  -1  -8 30.6938 4.52466  21
   1  -8   5 24.1232 3.43184  20
   5  -1   8 19.4365 2.84423  20
  -1  -5   8 30.6874 3.27812  20
  -1   5  -8 22.7856 3.07039  19
   5  -1   8 20.9341 4.08072  17
  -8   1  -5 21.6924 2.89539  19
  -5   8  -1 16.4731 3.48853  18
  -5  -1  -8 25.4994 3.18617  19
  -5  -1  -8 20.5779 2.83439  15
  -1  -5   8 17.4789 3.10837  16
  -1  -8  -5 16.6404 3.71966  15
   5   1  -8 21.6138 3.67165  15
   1  -8   5 21.5126 3.48379  16
   1  -5  -8 16.5591 3.58112  15
   1   8  -5 21.2563 3.62985   7
   8   5  -1 24.6447 4.08434   7
   8   1   5 26.7700 5.11780   8
   5   8   1 14.4223 4.11988   8
  -1   8   5 21.1356 3.94117   8
   5  -1   8 15.8241 3.74201   8
  -8   5   1 22.0958 3.36151  11
   8   5  -1 21.6782 4.40290   8
  -8   1  -5 25.9336 3.25902   9
  -5  -1  -8 26.2976 3.59330   9
  -5   8  -1 19.1877 3.37929  11
  -5  -1   8 22.6371 4.50465   5
  -8   1   5 14.9743 3.19980   5
  -8  -5   1 20.7560 4.13974   5
  -5  -8  -1 13.7316 3.04047   5
  -1  -8   5 25.1428 3.43878   5
  -8  -1  -5 23.4807 3.96572   5
   8  -5  -1 24.6533 4.06365   3
   8   1  -5 21.9603 4.26602   1
  -5  -8  -1 20.6839 4.40728   4
  -1  -8   5 28.8426 4.02437   4
  -8   1   5 18.0881 3.53308   2
  -5  -1   8 18.0464 3.22320   2
  -5   1  -8 26.2419 4.54052  27
  -8  -1  -5 26.6932 4.99762  27
   8  -5  -1 35.8352 4.27370  28
   8  -5  -1 22.3857 3.51146  29
  -5   8   1 26.7490 4.65556  27
   5  -1  -8 20.4147 3.02767  28
   8   5   1 22.3929 3.09890  29
   5  -8   1 20.1898 3.77927  30
  -8   5  -1 34.2096 5.14654  27
  -8   5  -1 16.7472 2.84166  14
   1   5  -8 21.8513 3.61951  15
  -8  -5   1 23.6489 3.71955  14
  -5   1  -8 23.3220 3.03209  15
  -1   5   8 16.0367 4.40382  13
  -5   8   1 18.5748 3.06135  13
  -5  -1   8 28.8155 3.83957  13
  -5   8   1 29.8241 3.83248   7
  -8   5  -1 14.5831 3.36596   6
   1   8   5 17.6679 4.02725   6
   8   5   1 22.8441 4.09369   7
   1   8   5 22.5532 4.75117   7
   5   8  -1 25.4758 4.42598   7
  -1   8  -5 21.5574 5.13361   6
  -1  -5  -8 21.1549 4.48686  25
   8   1  -5 24.8747 4.02238  24
   8  -1   5 19.6302 2.74703  26
  -5   1  -8 18.5208 5.07283  25
  -5  -8  -1 19.3258 4.58065  23
  -8  -5   1 31.8704 5.49669  23
   5   8  -1 26.2195 3.77627  24
   5  -1  -8 25.7986 4.28762  22
   5  -8   1 20.0417 3.62553  20
  -1  -8   5 22.5753 3.07392  20
   1  -8  -5 17.7626 5.30779  21
   1  -5   8 22.1705 3.11677  20
  -8   5  -1 25.8924 3.65550  18
  -8  -1  -5 24.6834 2.85406  19
   8  -1   5 20.3054 3.69018  17
   1   5  -8 25.0203 2.97308  19
  -1  -5  -8 21.2822 3.52039  15
  -5  -1   8 16.9933 2.54314  16
   5  -8   1 23.2211 3.38037  16
   5  -1  -8 19.2432 3.65175  15
  -1   8  -5 21.9179 3.45919   7
  -1   5   8 25.0163 4.42408   8
   1   8   5 23.4594 4.72183   8
   5   1   8 19.4275 4.44386   8
   8   5   1 15.3566 4.30062   8
  -8  -1  -5 25.0267 3.27813   9
  -5  -8  -1 15.2160 3.72238  12
   5   8  -1 22.7584 4.19601   8
  -5   1  -8 30.4596 3.58086   9
   1  -8  -5 28.2039 3.83320  12
  -5   8   1 19.4496 3.58493  11
  -8  -5   3 31.3896 5.29173   5
  -3  -8   5 36.2356 4.78370   5
  -8   3   5 40.0829 4.19339   5
  -8  -3  -5 32.6102 5.03025   5
  -3  -8   5 37.5054 4.94639   4
  -8   3   5 34.5890 4.75209   6
  -5  -3   8 45.9131 5.86585   5
  -5  -3   8 26.3170 4.38094   2
  -8   3   5 40.6890 5.17139   2
  -5  -8  -3 32.0827 5.44761   4
   3  -8  -5 40.6593 6.57331   3
   8   3  -5 38.9758 5.46379   1
  -5   3  -8 32.6486 5.50719  27
   8  -5  -3 39.1710 4.81451  29
   8   5   3 37.0809 4.24339  29
   5  -3  -8 42.4769 4.63916  28
  -5   8   3 39.9086 5.12280  27
  -5   8   3 31.6411 5.00308  13
  -8   3   5 41.5810 5.24067  13
  -5  -3   8 40.1101 4.72560  13
  -8  -5   3 34.2666 4.46134  14
  -3   8  -5 44.6458 6.67044   6
  -8   5  -3 42.7446 4.45649   6
  -5   8   3 37.6568 5.23367   7
   3   8   5 31.3764 5.85415   7
   8   5   3 38.4410 5.37367   7
  -5   8   3 39.9431 5.93121   6
  -3   5   8 30.3352 4.49236   6
  -3   8  -5 29.2109 5.37398  25
   5   8  -3 35.8743 5.18989  24
  -3   8  -5 32.5718 7.58905  27
  -5   3  -8 32.2422 6.31217  25
   8  -3   5 35.7711 4.00021  26
   8   3  -5 39.4184 5.71609  24
   3  -5   8 37.3912 3.61532  26
  -8  -3  -5 27.6281 6.73196  23
  -5  -8  -3 31.1354 5.83156  21
   5  -3  -8 29.4776 5.35651  22
  -5  -8  -3 23.9580 5.56063  23
   5  -8   3 34.9733 4.74496  20
   3  -5   8 36.2738 4.39998  20
   3  -8  -5 33.9154 6.64661  21
  -3  -5  -8 39.9262 6.58764  21
  -5  -3   8 35.0845 4.34045  20
  -3  -8   5 36.3042 4.19910  20
  -3  -8   5 42.8992 4.84185  16
  -5  -3   8 34.0032 4.07360  16
  -8  -3  -5 40.3942 4.04371  19
  -5   3  -8 43.1172 4.50577  19
   5  -8   3 41.7088 4.69920  16
  -3  -5  -8 27.5098 4.28772  19
  -3  -5  -8 31.1157 4.42022  15
   3   5  -8 41.6190 4.96570  15
  -5   3  -8 41.8510 4.52710  15
   3  -8  -5 44.8787 5.74643  15
   5  -3  -8 45.4879 5.22957  15
   8   3  -5 30.1712 4.86786   7
   8   5   3 31.3834 5.82780   8
   3   8   5 40.5546 6.05475   8
   5   3   8 41.3117 6.37400   8
   5   8  -3 30.9228 5.47483   7
  -3   5   8 43.0081 5.20071   8
  -8  -5   3 28.0544 4.20460  12
  -8  -3  -5 41.6639 4.52802   9
  -8   3   5 36.6572 4.47105  11
  -5   3  -8 38.2322 4.55342   9
  -8  -5   5 4.66563 3.19979   5
  -5  -5   8 3.45195 2.89571   5
  -5  -8   5 6.72677 2.79669   5
  -5  -8   5-0.69966 2.88277   4
  -5   5   8 1.21663 2.44613   6
  -8  -5  -5 9.34738 2.99386   5
  -8   5   5 7.35324 3.16370   6
  -8   5   5 2.63391 3.26668   2
   8   5  -5 1.75574 3.30331   1
  -5  -8  -5-0.42961 3.67524   4
   5   5  -8 0.33575 3.32654   1
   5  -5  -8 4.51763 3.48447   3
   8  -5  -5 4.21765 2.93319  28
   8   5   5 5.62227 1.83208  29
  -8   5  -5 1.08296 4.07204  27
  -5   5  -8 5.23605 4.53776  27
  -8   5   5 3.58500 2.92802  13
   5   8  -5 4.88794 2.79359  15
   5   5  -8 1.85579 2.53920  15
  -5   8   5 7.47185 3.40800  13
  -5   5   8 2.30793 3.51613  13
  -5   5  -8 5.21506 2.65601  15
  -8  -5   5 2.56833 2.11419  14
   5   8   5 7.27728 3.58354   7
  -5   8  -5 4.35135 3.48786   6
  -5   8   5 6.92779 3.64086   6
   5   5   8 3.56460 3.32584   7
   8  -5   5 2.73474 1.52108  26
   5   8  -5 0.85693 3.22663  24
  -5   8  -5 0.68255 5.66191  27
   8   5  -5 3.32743 3.72588  24
  -5   5  -8 6.53966 4.97454  25
   5  -5   8 3.63943 1.28641  26
  -8  -5  -5 2.62905 5.11599  23
   5  -5  -8 2.19440 3.73641  22
  -8  -5  -5 3.19483 2.95427  21
  -5  -8  -5 1.57249 4.24200  23
   5  -5   8 3.71501 1.93679  20
  -5  -8  -5 4.72786 4.44265  21
  -5  -5  -8 9.93863 4.62857  21
  -5  -5   8 0.46851 1.80050  20
   8  -5   5 0.24631 1.69351  20
   5  -8   5 3.12436 2.28851  20
  -5  -8   5 3.50407 1.51514  20
  -5   5  -8 2.12843 2.06309  19
  -5  -5  -8 1.63109 1.78105  19
  -8  -5  -5 3.10846 1.49236  19
   8  -5  -5-0.32622 2.56503  15
   5  -5  -8 6.57641 2.78830  15
  -5  -5   8 3.94753 1.98168  16
  -5  -8   5 2.70901 2.47761  16
   5  -8  -5 5.29435 3.30164  15
  -5  -8  -5 2.35069 2.40153  15
   5  -8   5 3.11064 2.13984  16
   5   8  -5 4.19510 3.02707   7
   8   5  -5 4.06340 2.96462   7
   5   8   5 1.08995 4.19651   8
  -5   5   8 2.31288 2.61195   8
   8   5   5 8.41321 4.58526   8
   5   5   8-1.61828 4.43312   8
  -8  -5  -5 2.75508 1.89965   9
  -8   5  -5 2.46190 1.97618  10
  -5  -5  -8 1.91745 2.55487   9
  -5   5   8 3.94468 2.42145  11
  -5  -8  -5 4.13537 1.79065   9
  -8   5   5 4.61613 2.26901  11
  -5   5  -8 5.07015 1.96950   9
  -4  -6   8 25.4924 4.63503   5
  -8  -6  -4 21.9342 3.99856   5
  -6  -8   4 31.1203 4.56026   5
  -8  -6  -4 19.3580 3.91530   4
  -6  -8   4 26.9978 4.61080   4
  -6   4   8 26.4262 4.22661   6
  -8  -4   6 31.0949 4.28560   2
  -6   4   8 33.0222 4.56881   2
   6  -8  -4 34.3700 5.86291   3
   6   4  -8 27.9242 4.86429   1
   4  -6  -8 35.3259 5.32588   3
  -8   4  -6 24.9047 5.57148  27
   8  -4  -6 34.2733 4.45753  28
  -8   6   4 30.3008 4.68681  13
  -4   8   6 20.7589 4.95483  13
   4   8  -6 27.5870 4.28144  15
  -8  -4   6 31.1977 4.03596  14
   6   8   4 26.3635 5.46652   7
  -4   8   6 27.5173 5.02450   6
  -8   6   4 28.3505 4.63965   6
   4   6   8 24.1002 4.93576   7
  -6   8  -4 30.5812 4.82161   6
   8   6  -4 38.7932 5.53642  24
   6  -4   8 29.1121 3.23269  26
  -4   6  -8 32.1554 6.30526  25
  -4   6  -8 33.2062 6.64201  27
  -4  -8  -6 28.2063 5.88347  23
  -8  -6  -4 25.2587 4.67342  21
   8  -4  -6 26.1198 4.68808  22
  -8  -6  -4 11.9376 5.40497  23
  -6  -4  -8 27.8985 5.71960  21
  -4  -6   8 25.4534 3.54709  20
   4  -8   6 29.7123 4.01872  20
   8  -6   4 23.8170 3.77663  20
   6  -4   8 31.3089 3.87581  20
  -4  -8  -6 30.9204 6.04349  21
   6  -4   8 24.2112 4.86634  17
  -4   6  -8 29.8881 3.86492  19
  -6  -4  -8 33.8072 3.95240  19
  -6   8  -4 23.6802 4.54586  18
  -4  -6   8 28.8287 3.98936  16
   4  -6  -8 31.5940 4.84299  15
   6  -8  -4 29.6998 5.28286  15
   8  -4  -6 38.6388 4.65587  15
   4  -8   6 24.6607 3.98107  16
  -4   6  -8 36.7685 4.73904  15
  -4  -8  -6 27.3949 4.21155  15
   6   4  -8 25.9933 4.22485  15
   6   8   4 34.1130 5.76899   8
   4   6   8 21.6124 5.67112   8
  -4   8   6 23.9505 4.13164   8
   8   4   6 29.9499 6.28073   8
   4   8  -6 21.3010 4.46733   7
   8   6  -4 26.7022 4.72840   7
  -6   4   8 38.7330 4.81726   8
  -6   4   8 27.2607 3.94918  11
  -8   4  -6 28.3135 3.88443  10
  -8  -6  -4 28.5001 3.63589   9
  -6  -4  -8 27.6941 4.20882   9
  -8   6   4 33.9349 4.44752  11
  -8  -6  -2 20.4450 3.42498   5
  -6   2   8 17.2593 3.24147   5
  -8  -2   6 18.8108 3.88443   5
  -2  -6   8 6.05496 3.25165   5
  -6  -8   2 11.5909 3.21071   5
  -8  -6  -2 16.9361 3.32679   4
  -8  -2   6 11.3965 3.17609   2
   2  -6  -8 14.6232 3.99044   3
  -6  -8   2 13.6214 3.63446   4
  -6   2   8 16.8749 3.29858   2
   6   2  -8 25.2069 4.37074   1
   6  -8  -2 10.4716 4.45877   3
   8  -6   2 16.6986 3.92777  28
   8  -2  -6 15.8791 3.21961  28
  -6   8  -2 11.8821 5.23879  27
   8  -6   2 28.9224 4.08358  30
  -8   6   2 20.0554 4.01795  27
  -8   2  -6 10.7993 4.43380  27
  -2   6  -8 17.7853 3.38039  15
   2   8  -6 18.0768 3.50047  15
  -8  -2   6 16.0136 2.97003  14
  -6   2   8 23.2371 3.96320  13
  -6  -8   2 16.0796 3.73258  12
  -2   8   6 19.9035 4.60674  13
  -2   8   6 26.7678 5.08543   7
  -6   8  -2 17.7805 4.22166   6
   6   8   2 12.5161 3.97558   7
  -2   8   6 19.9350 4.22595   6
  -8   6   2 23.9084 4.02490   6
   2   6   8 12.3218 4.17644   7
  -2   6  -8 9.47044 4.56975  25
   8  -2  -6 14.8412 3.45770  24
  -2   6  -8 9.87265 5.12456  27
   6  -2   8 21.0737 2.38491  26
   8   6  -2 24.8574 4.02060  24
   6   2  -8 26.4009 4.37972  22
  -8  -6  -2 10.1111 4.76923  23
   8  -2  -6 11.8849 3.48691  22
   8  -6   2 16.6412 3.13566  20
   2  -8   6 21.2104 3.10455  20
   6  -2   8 24.0209 2.81034  20
  -2  -6   8 10.0198 2.53868  20
  -8   2  -6 14.4459 2.64353  19
  -2   6  -8 10.8794 2.63709  19
   6  -2   8 15.8910 3.95815  17
  -6   8  -2 6.73813 3.44580  18
  -6  -2  -8 22.8752 2.98388  19
  -2  -8  -6 16.5762 3.54394  15
   6  -8  -2 18.2041 3.84167  15
  -2  -6   8 11.4767 2.87964  16
   2  -8   6 20.0684 3.28304  16
   8  -2  -6 14.7652 3.10961  15
   6   2  -8 26.2990 3.88303  15
  -2   8   6 20.6539 3.71747   8
   8   2   6 12.7458 4.61012   8
   6   8   2 13.3141 4.44985   8
   2   8  -6 12.5868 3.15821   7
   8   6  -2 13.8447 3.88834   7
  -2   6  -8 13.0541 2.55649   7
   2   6   8 19.6430 4.97984   8
  -8   2  -6 15.5554 2.77007   9
  -8   6   2 25.2697 3.51887  11
  -6   8  -2 9.80614 2.67343  11
  -6   0   8 5.02422 2.78347   5
  -8   0   6 3.12084 2.59465   5
  -6  -8   0-0.58711 2.06068   5
  -8  -6   0 5.42889 2.47727   4
  -8  -6   0 2.74904 2.52366   5
   8  -6   0 1.76531 3.29058   3
  -6   0   8 0.79410 2.27876   2
   6  -8   0 9.62387 4.18011   3
  -8   0   6 1.73149 2.51691   2
  -6  -8   0 0.38019 2.68147   4
   8  -6   0-0.67592 3.16289  28
   6   0  -8 4.60839 1.91221  28
  -8   0  -6 3.45594 3.53163  27
   6  -8   0 2.61605 2.86282  30
  -6   8   0 4.25272 4.38237  27
  -8   6   0 10.1879 4.33218  27
  -6   0  -8 5.91039 3.58876  27
   0   8  -6 5.97542 2.96342  15
  -6   0   8 4.18827 2.65123  13
  -6  -8   0 2.80920 2.92559  12
  -8   6   0 1.39129 1.66076  14
  -8   6   0-1.62423 2.73998   6
  -6   8   0 3.97881 3.68738   6
   0   6   8 7.08478 3.66053   7
   6   8   0 2.49181 2.98765   7
   0   8   6 0.38439 2.94409   6
   8   6   0-1.11554 2.83182   7
   0   6  -8 2.52952 5.11129  27
   8   0  -6 1.47131 2.81793  24
   8   0   6 3.48414 1.49643  26
   6   0  -8 3.10060 2.89079  22
  -8  -6   0 0.54307 3.82399  23
   8   0  -6-0.90221 2.98738  22
   6   8   0 1.52482 2.40669  24
  -6  -8   0-0.50345 4.11380  23
   8   6   0 3.25951 2.50182  24
   0  -8   6 3.34981 2.07008  20
   0  -8  -6 4.15333 4.51065  21
   8  -6   0 0.33634 2.54786  20
   6  -8   0 0.72789 2.51398  20
  -8   0  -6 4.86692 1.71048  19
   0   6  -8 1.84439 1.74488  19
  -8   6   0 4.17557 2.67735  18
  -6   0  -8 3.62052 1.85625  19
   0  -6   8 5.00482 2.19303  16
   6   0  -8-2.29873 2.61679  15
   0  -8  -6 0.77943 2.87797  15
   0  -6  -8 4.03528 2.69544  15
   0   8  -6 4.45108 2.38610   7
   0   6   8 3.24748 3.48565   8
   6   8   0 6.64826 3.33225   8
   0   8   6-0.39020 2.95318   8
   0   6  -8 2.09641 2.00791   7
   6   0   8 3.25979 3.36202   8
  -8   0  -6 0.78965 1.79803   9
  -6   8   0 2.88647 2.26500  11
  -6   0  -8 5.55562 2.38342   9
   8   6   0-0.93206 3.60788   8
  -8   6   0 2.56122 2.05326  11
  -6  -2   8 13.4733 4.09542   5
  -8  -2  -6 25.3119 4.02434   5
  -8   2   6 18.7860 3.04206   5
  -8  -6   2 12.2493 3.71296   5
  -2  -8   6 13.5145 3.10757   5
  -6  -2   8 12.6167 3.10045   2
  -8   2   6 16.2195 3.39913   2
   8   2  -6 28.5958 4.23707   1
  -2  -8   6 7.79838 3.05244   4
   2  -8  -6 9.18339 4.43782   3
   8  -6  -2 16.4591 4.25380   3
  -6  -8  -2 17.9394 4.10260   4
   8  -6  -2 12.6956 3.76108  28
  -8  -2  -6 17.4156 4.28000  27
  -6   2  -8 14.7649 4.35455  27
  -8   6  -2 17.7626 5.11358  27
   8   6   2 17.7082 2.60417  29
   8  -6  -2 14.8292 3.05045  29
  -6   8   2 21.3084 4.04938  27
   6  -2  -8 13.3979 2.81047  28
  -8  -6   2 16.7913 3.11552  14
   2   6  -8 25.4905 3.67603  15
  -6  -2   8 15.9061 3.31766  13
  -6   8   2 20.2002 3.26202  13
  -6   2  -8 18.1737 2.85728  15
   2   8   6 12.8625 4.38637   7
  -8   6  -2 14.4623 3.14434   6
   8   6   2 16.7984 3.82389   7
  -2   8  -6 4.96150 4.50038   6
  -2   8  -6 16.8499 4.80814  25
  -2   8  -6 23.2432 6.90219  27
  -6   2  -8 20.4978 5.14189  25
   8  -2   6 24.8231 2.64176  26
   8   2  -6 13.4832 3.87579  24
   6   8  -2 32.0076 4.01816  24
  -6  -8  -2 6.52693 4.40538  23
  -6  -8  -2 15.3986 4.38983  21
   6  -2  -8 10.5314 3.77287  22
   2  -6   8 22.9806 3.23810  20
  -2  -8   6 16.7655 2.82810  20
  -2  -6  -8 20.0837 5.32193  21
   2  -8  -6 12.8726 5.22017  21
   6  -8   2 19.2991 3.42113  20
  -6   2  -8 12.9099 2.82575  19
  -8   6  -2 10.4973 3.00487  18
   8  -2   6 14.9382 3.45507  17
  -8  -2  -6 22.7709 2.70944  19
  -2  -6  -8 20.4251 3.39373  15
   2  -8  -6 18.4088 4.21002  15
   6  -2  -8 13.2681 3.37406  15
   2  -6   8 17.1609 3.10515  16
  -2  -8   6 11.1412 2.92334  16
   6   8  -2 22.8721 4.24507   7
   2   8   6 12.7710 4.49887   8
  -2   6   8 18.6347 3.92331   8
   8   6   2 21.2767 4.63484   8
   2   6  -8 13.4619 3.16035   7
   6   2   8 8.98717 4.72660   8
   6   8  -2 10.4970 3.78508   8
  -8  -6   2 14.7529 3.14208  12
  -6  -8  -2 18.8808 3.88133  12
  -6   8   2 23.3601 3.87732  11
  -6   2  -8 20.0845 3.18056   9
  -8   2   6 20.1562 2.92432  11
  -8  -2  -6 22.2788 3.08248   9
  -4  -8   6 27.9504 4.39795   5
  -8   4   6 23.4972 4.28353   6
  -8  -6   4 29.4721 4.96621   5
  -4  -8   6 22.8111 4.23102   4
  -8  -4  -6 31.3184 4.67975   5
   8   4  -6 29.3986 4.93872   1
  -6  -4   8 24.8086 4.03807   2
  -6  -8  -4 24.3532 4.89153   4
  -8   4   6 36.9142 4.96255   2
   4  -8  -6 23.5717 5.58483   3
   8  -6  -4 39.4369 5.32571   3
   8  -6  -4 32.8020 4.82495  28
  -6   4  -8 28.8088 5.47687  27
   6  -4  -8 34.9243 4.24973  28
   4   6  -8 25.1915 4.26995  15
  -6   8   4 25.2212 4.87409  13
  -8   4   6 30.2707 4.84167  13
  -8  -6   4 35.1963 4.11131  14
  -4   6   8 27.7562 5.28306  13
  -6   8   4 36.5392 5.42439   6
  -4   8  -6 31.3257 5.97535   6
   8   6   4 25.8342 4.89613   7
   4   8   6 33.1641 5.64295   7
  -4   6   8 24.1256 4.22049   6
  -8   6  -4 26.0183 3.79667   6
   8   4  -6 21.2661 5.00162  24
  -4   8  -6 30.6958 6.92388  27
  -6   4  -8 29.8596 6.19258  25
   8  -4   6 27.0990 3.35312  26
   6   8  -4 27.3147 4.86355  24
   4  -6   8 26.9984 3.00614  26
  -4   8  -6 34.7778 5.69074  25
  -8  -4  -6 18.1541 6.50016  23
   6  -4  -8 35.1009 5.21131  22
  -6  -8  -4 20.2209 5.56702  23
  -6  -8  -4 22.9880 5.42426  21
  -4  -6  -8 32.8305 6.34514  21
   6  -8   4 21.2270 3.93832  20
  -4  -8   6 27.1906 3.53658  20
  -6  -4   8 29.1109 3.85765  20
   4  -6   8 30.5449 3.94998  20
   8  -4   6 31.7631 4.56371  17
  -8  -4  -6 35.3000 3.67187  19
  -4  -6  -8 20.3584 3.64736  19
   4  -6   8 28.5753 4.01089  16
   4  -8  -6 30.8538 5.14774  15
  -4  -6  -8 17.2267 3.57470  15
   6  -4  -8 38.6222 4.90482  15
   6  -8   4 28.7842 3.97047  16
  -4  -8   6 33.6981 4.27077  16
   8  -6  -4 30.7847 4.69534  15
  -6   4  -8 36.0594 4.22043  15
  -4   6   8 30.9617 4.43739   8
   8   6   4 26.5791 5.62695   8
   6   8  -4 22.7391 4.58840   7
   4   8   6 20.4016 5.42611   8
   6   4   8 39.4252 6.26797   8
   4   6  -8 30.2509 4.63245   7
   8   4  -6 17.2022 4.39219   7
  -6   8   4 27.3708 4.60781  11
  -8   4   6 23.3295 3.85826  11
  -8  -4  -6 29.4889 3.99409   9
  -6   4  -8 25.3828 3.76213   9
  -8   6  -4 30.6844 3.97101  10
  -6  -6   8 4.61182 3.37308   5
  -6  -8   6 0.40777 3.02532   5
  -8  -6   6 3.96773 3.67085   5
  -8   6   6-0.79971 3.19887   6
  -6  -8   6 9.25722 3.01284   4
  -8  -6  -6 8.28297 3.14104   5
  -6   6   8 7.30892 2.89594   6
   6  -6  -8 8.39635 4.11005   3
  -6  -8  -6-1.30944 3.91227   4
   8  -6  -6 19.4417 4.48383   3
  -6   8  -6 1.53403 6.10652  27
  -6   6  -8 0.63211 5.22388  27
  -8   6  -6 9.42967 5.06320  27
   8  -6  -6 11.7928 3.47399  28
   6   8  -6 4.54458 2.91969  15
  -6   8   6 4.34890 3.68772  13
   6   6  -8-0.69079 3.06420  15
  -8  -6   6 4.30384 2.31318  14
  -8   6   6 5.13802 3.60771  13
  -6   6   8 1.03609 3.71056  13
  -6   8   6 10.9933 3.85706   6
   6   8   6 2.07235 3.88073   7
   6   6   8 6.40143 4.04391   7
   8  -6   6 4.48582 1.70396  26
  -6   6  -8 4.72870 4.83731  25
   6   8  -6-3.59562 4.05416  24
   8   6  -6 2.18907 3.94399  24
   6  -6   8 3.41966 1.33326  26
  -8  -6  -6-0.72615 5.84463  23
  -8  -6  -6 5.08060 3.44248  21
   6  -6  -8 2.88016 3.72786  22
  -6  -8  -6 1.25721 4.84385  21
  -6  -8  -6 0.62768 5.10872  23
   6  -8   6 3.30194 2.30212  20
  -6  -6   8 10.3926 2.16214  20
   6  -6   8 6.55256 2.27815  20
   8  -6   6 1.70743 1.93622  20
  -6  -6  -8 6.05990 4.82981  21
  -6   6  -8 9.73840 2.62194  19
  -6  -6  -8 1.79530 1.89137  19
   6  -6   8 2.95665 2.34016  16
  -6  -8  -6 2.01446 1.91319  19
   8  -6  -6 5.84875 3.51373  15
   6  -6  -8 7.88351 3.45739  15
   6  -8   6 1.19970 2.38602  16
  -6  -8   6 11.0005 3.00647  16
   6  -8  -6 7.12831 3.60592  15
   8   6  -6 0.42329 3.42010   7
  -6   6   8 6.85887 3.21458   8
   8   6   6 7.53758 4.78394   8
   6   6   8 9.62772 4.87319   8
  -8   6  -6 3.07048 2.15171  10
  -6  -6  -8 2.29573 2.36628   9
  -8   6   6 2.20024 2.56852  11
  -6   6   8 6.48737 2.83423  11
  -6   8   6 7.82693 3.41042  11
  -8  -6  -6 2.26967 2.16017   9
  -5  -7   8 8.90776 3.25463   5
  -7  -8   5 4.70268 3.39225   5
  -7   5   8 7.67120 3.25685   6
  -8  -7  -5 5.59131 2.83787   5
  -7  -8   5 5.02765 3.14479   4
  -7   5   8 1.94576 3.52138   2
   7   5  -8 6.76440 4.17190   1
   7  -8  -5 8.33883 4.74654   3
   5  -7  -8 2.84393 4.41188   3
   8  -5  -7 9.95140 3.30607  28
  -5   7  -8 7.23973 6.37480  27
  -8   5  -7 1.18165 4.97823  27
  -5   8   7 8.46868 4.22390  13
   5   8  -7 8.81468 3.51836  15
  -7   5   8 10.5867 3.98990  13
  -8  -5   7 6.92247 2.40048  14
   7   5  -8 8.45574 3.09962  15
  -8   7   5 9.61017 3.74142  13
  -8   7   5 7.97257 3.87555   6
  -5   8   7 5.03765 3.64674   6
   7   8   5 5.13490 3.96560   7
   5   7   8 6.95731 4.35764   7
   8   7  -5 3.73118 3.84364  24
  -5   7  -8 11.8737 5.90968  25
   7  -5   8 7.83727 1.74104  26
  -5  -8  -7 4.36171 5.24652  23
   8  -5  -7 6.18002 3.86088  22
  -8  -7  -5 7.57815 5.41639  23
  -8  -7  -5 5.95055 4.10891  21
  -5  -8  -7 18.8556 5.82763  21
   5  -8   7 7.21054 2.54196  20
  -5  -7   8 5.20953 2.14659  20
   7  -5   8 8.63093 2.26499  20
   8  -7   5 6.63711 2.44210  20
  -5  -8  -7 1.63121 2.01677  19
  -7  -5  -8 6.86469 2.22403  19
   8  -5  -7 6.39007 3.44716  15
   5  -8   7 6.27062 2.76205  16
   7  -8  -5 7.49729 3.96420  15
  -5  -7   8 9.89764 2.75911  16
   5  -7  -8 6.67811 3.56690  15
   7   5  -8 8.12370 3.71061   7
   5   8  -7 5.71827 3.53275   7
   8   5   7 7.84361 4.80432   8
  -5   8   7 14.5083 3.22750   8
   8   7  -5 3.07830 3.56187   7
  -7   5   8 6.07996 2.80353  11
  -5  -8  -7 3.67307 2.25084   9
  -7  -5  -8 10.6761 2.94035   9
  -8   7   5 8.84655 3.12665  11
  -8  -7  -3 21.7642 3.88123   5
  -8  -3   7 29.2260 5.21329   5
  -7  -8   3 23.3545 4.24668   5
  -7   3   8 24.1857 3.81853   6
  -7  -8   3 18.3282 3.92222   4
  -3  -7   8 16.1466 3.88442   5
  -8  -7  -3 18.5143 3.92623   4
  -7   3   8 21.9557 4.06692   2
   7   3  -8 27.9356 4.90656   1
  -8  -3   7 22.5520 3.94061   2
   3  -7  -8 17.9435 4.97730   3
   7  -8  -3 26.4485 5.49099   3
   8  -3  -7 21.6820 3.78375  28
  -7   8  -3 22.4323 6.24528  27
  -8   3  -7 15.9668 5.24515  27
  -8   7   3 19.1328 3.99072  27
  -3   8   7 16.5758 4.61658  13
  -3   7  -8 16.1238 3.90499  15
  -8   7   3 17.6337 3.87997  13
   3   8  -7 25.8739 4.30627  15
  -7  -8   3 28.9115 4.66275  12
  -7   3   8 14.4980 4.15388  13
  -8  -3   7 23.1539 3.70294  14
  -3   8   7 20.4108 5.03345   7
   3   7   8 24.9962 5.31206   7
   7   8   3 13.5540 4.34920   7
  -7   8  -3 26.4369 4.69972   6
  -3   8   7 19.3991 4.38435   6
  -3   7  -8 21.6506 6.29569  27
   7  -3   8 21.4999 2.81226  26
  -3   7  -8 22.5669 6.36221  25
   8  -3  -7 20.4777 4.49217  22
  -8  -7  -3 24.0448 4.68750  21
   8   7  -3 31.1835 4.87562  24
  -8  -7  -3 15.1486 5.33160  23
   8  -7   3 18.8418 3.52941  20
   3  -8   7 23.3267 3.54851  20
  -3  -7   8 16.7794 3.11714  20
  -3  -8  -7 17.7117 5.94781  21
  -8   3  -7 24.0486 3.40011  19
  -3   7  -8 18.6721 3.30858  19
   7  -3   8 23.9520 4.43304  17
  -7  -3  -8 23.9227 3.37584  19
   8  -3  -7 30.1243 4.36512  15
  -3  -7   8 27.9575 3.72186  16
   7   3  -8 26.4363 4.14154  15
   3  -8   7 11.7479 3.42645  16
   7  -8  -3 25.9635 4.87677  15
  -3  -8  -7 22.0476 4.27436  15
   3  -7  -8 22.2592 4.42466  15
   3   7   8 19.1908 5.44179   8
  -3   8   7 28.6104 4.41140   8
   3   8  -7 18.2853 3.91425   7
   8   3   7 22.8865 5.17774   8
   8   7  -3 19.7699 4.40280   7
  -7  -3  -8 28.5159 3.97678   9
  -8   3  -7 26.7536 3.51720   9
  -8   7   3 22.8398 3.95944  11
  -8  -7  -1 23.1200 4.60306   4
  -7   1   8 21.5227 4.15959   5
  -8  -1   7 34.2021 5.12688   5
  -7  -8   1 21.9784 4.43402   5
  -8  -7  -1 22.5275 4.11286   5
  -8  -1   7 33.7989 4.53847   2
   7   1  -8 30.9586 5.16954   1
  -7   1   8 19.6836 4.06472   2
   8  -7   1 25.5481 5.02222   3
   1  -7  -8 33.8816 5.40002   3
   7  -8  -1 38.3877 5.71846   3
  -7  -8   1 25.4650 4.59166   4
  -7   8  -1 30.6942 6.48451  27
   8  -1  -7 29.8869 4.11187  28
   8  -7   1 32.2686 4.88116  30
  -8   7   1 21.2015 5.22045  27
  -8   1  -7 22.4117 5.31573  27
   1   8  -7 26.1434 4.61025  15
  -1   7  -8 34.1680 4.72304  15
  -7  -8   1 28.3312 4.81692  12
  -1   8   7 16.9003 5.16371  13
  -7   1   8 33.6021 4.81402  13
   1   7   8 25.3360 5.44827   7
  -1   8   7 21.6004 4.55720   6
   8   7  -1 25.7704 5.13997   7
   7   8   1 28.9358 5.43443   7
  -7   8  -1 31.5374 5.16862   6
  -8   7   1 27.9185 5.02856   6
   8  -1  -7 23.4702 4.58363  24
  -1   7  -8 32.9890 5.95810  25
  -1   7  -8 37.8299 7.44102  27
   8  -1  -7 26.9623 4.82347  22
   7   1  -8 25.0268 4.79323  22
   8   7  -1 35.7533 4.89623  24
  -8  -7  -1 20.7905 5.60110  23
   8  -7   1 31.2307 4.44888  20
  -1  -7   8 28.0524 3.93426  20
  -1   7  -8 26.4619 3.73223  19
  -7  -1  -8 36.4079 4.04204  19
  -8   1  -7 31.5618 3.84972  19
   7  -1   8 25.6189 4.98022  17
  -7   8  -1 27.7493 4.67249  18
   8  -1  -7 32.5415 4.49608  15
  -1  -7   8 32.1043 4.23800  16
   1  -8   7 30.3589 4.26897  16
   7   1  -8 34.4299 4.56056  15
  -1  -8  -7 23.0131 4.65072  15
   1  -7  -8 21.6399 4.48246  15
  -1   8   7 26.1522 4.85908   8
   8   1   7 32.9716 5.59525   8
   7   8   1 27.3353 5.38538   8
  -1   7  -8 30.4742 3.91477   7
   1   8  -7 37.6975 4.42259   7
   1   7   8 28.9098 5.46907   8
  -8   1  -7 31.0719 4.07557   9
  -7   8  -1 32.8248 4.31022  11
  -8   7   1 24.5388 4.20376  11
  -8  -7   1 27.3761 4.39428   4
  -7  -1   8 31.5390 5.40838   5
  -8   1   7 27.8931 4.21075   5
  -8  -7   1 27.1692 4.60989   5
  -7  -8  -1 21.5578 3.96642   5
  -1  -8   7 30.0170 4.30244   5
   7  -8   1 25.9725 5.09460   3
  -7  -8  -1 23.8712 4.72091   4
  -8   1   7 16.1020 4.06202   2
   8  -7  -1 31.7271 5.32743   3
  -7  -1   8 22.9856 4.29415   2
  -8  -1  -7 18.5053 4.90699  27
   7  -8   1 29.3405 4.83766  30
  -8   7  -1 35.5403 6.30168  27
  -7   8   1 27.9349 5.45346  27
  -7   1  -8 21.8305 5.33005  27
   7  -1  -8 39.1586 4.14978  28
   8  -7  -1 29.2885 5.00393  28
  -7  -1   8 38.0229 4.69202  13
  -8   1   7 32.5531 4.71274  13
  -1   7   8 17.9187 5.20819  13
   1   7  -8 30.0491 4.48354  15
  -1   7   8 26.2156 5.34493   7
   7   8  -1 27.9432 5.04332   7
  -8   7  -1 28.2277 4.74269   6
   8   7   1 32.1957 5.08767   7
  -7   8   1 38.5389 5.59881   6
  -1   8  -7 21.5943 5.79235   6
   1   8   7 23.6374 5.46889   7
   8   1  -7 15.5091 4.80603  24
  -1   8  -7 32.8495 7.94851  27
   8  -1   7 28.2318 3.46500  26
   7  -1  -8 23.7032 4.78625  22
   8   1  -7 32.6433 5.03071  22
   7   8  -1 28.8616 4.60039  24
  -7  -8  -1 20.9572 5.57089  23
  -1  -8   7 27.8123 3.78330  20
   7  -8   1 26.8234 4.50031  20
  -1  -7  -8 31.5212 6.65121  21
   1  -8  -7 40.3261 6.92528  21
   8  -1   7 22.7528 4.62255  17
  -8  -1  -7 32.8166 3.85990  19
  -7   1  -8 36.2637 4.08495  19
  -8   7  -1 33.3402 4.72688  18
   8   1  -7 30.7434 4.31507  15
  -1  -8   7 32.4711 4.25143  16
   1  -8  -7 29.8712 4.97710  15
   7  -1  -8 35.9234 4.69555  15
  -1  -7  -8 31.8844 4.75635  15
   8   7   1 25.8240 5.28467   8
  -1   7   8 20.3713 4.73485   8
   1   8   7 26.7507 5.53241   8
   7   1   8 25.5125 5.34962   8
  -1   8  -7 27.5034 3.95385   7
   1   7  -8 22.0884 4.02936   7
   7   8  -1 22.7750 5.03964   8
  -8  -7   1 25.6734 4.34126  12
  -7  -8  -1 26.0492 4.63299  12
  -7   8   1 25.7169 4.29763  11
  -7   1  -8 32.1692 4.14439   9
  -3  -8   7 21.8788 3.98747   5
  -3  -8   7 24.9737 4.00557   4
  -8  -7   3 23.0743 4.44668   5
  -8   3   7 20.2980 3.82638   6
  -7  -3   8 23.6677 4.80123   5
  -8  -7   3 20.0967 3.96687   4
   8  -7  -3 22.4218 5.29389   3
  -7  -3   8 20.0023 3.78967   2
  -7  -8  -3 17.3828 4.22374   4
  -8   3   7 29.4506 4.46212   2
   3  -8  -7 29.3646 5.59639   3
   7  -3  -8 28.3719 3.80788  28
  -7   3  -8 19.7325 5.48856  27
  -8   7  -3 12.0009 5.73539  27
  -8  -7   3 25.6705 4.18152  12
  -8  -7   3 21.8422 3.57882  14
   3   7  -8 21.1715 4.16818  15
  -3   7   8 13.8371 4.54722  13
  -7   8   3 20.6303 4.04017  13
   8   7   3 26.7076 5.14162   7
   3   8   7 33.4219 5.61626   7
  -8   7  -3 25.1572 3.98896   6
  -3   7   8 22.6812 4.39320   6
  -7   8   3 28.3232 5.20985   6
  -3   8  -7 34.2020 6.07987   6
   8   3  -7 15.7673 4.73239  24
  -3   8  -7 13.4168 5.25857  25
  -7   3  -8 23.6779 5.91002  25
  -3   8  -7 17.3516 6.75111  27
   7   8  -3 29.5317 4.68341  24
   8  -3   7 21.6862 2.92019  26
   7  -3  -8 22.4494 4.80720  22
  -7  -8  -3 15.3855 5.39817  23
  -7  -8  -3 19.4074 4.83998  21
   3  -7   8 23.1781 3.63955  20
   7  -8   3 23.6449 3.82133  20
  -3  -7  -8 19.2669 5.85733  21
  -3  -8   7 19.6360 3.24862  20
  -7   3  -8 24.9787 3.55150  19
  -8  -3  -7 29.3715 3.43549  19
  -8   7  -3 23.1900 4.20777  18
   8  -3   7 24.9143 4.42452  17
   3  -7   8 14.7566 3.51018  16
  -3  -8   7 23.6825 3.71285  16
   7  -3  -8 30.1498 4.56337  15
   3  -8  -7 19.5701 4.51283  15
  -3  -7  -8 17.0510 3.71737  15
  -3   7   8 21.8767 4.51002   8
   8   7   3 23.1575 5.18594   8
   7   8  -3 33.4942 5.00314   7
   7   3   8 13.5902 5.04832   8
   3   8   7 22.4368 5.38150   8
   3   7  -8 21.5925 4.17179   7
  -8   3   7 25.2951 3.51339  11
  -8  -3  -7 21.0272 3.65113   9
  -7   3  -8 20.2750 3.45095   9
  -8   5   7 8.06844 3.07737   6
  -5  -8   7 5.94790 3.25318   5
  -8  -5  -7 4.50201 3.23236   5
  -8  -7   5 11.8007 3.47944   5
  -5  -8   7 8.51584 3.20445   4
  -8   5   7 15.1177 3.91441   2
  -7  -8  -5 5.97156 3.64940   4
   5  -8  -7 9.79466 4.88489   3
   8  -7  -5 9.54549 4.95646   3
  -7   5  -8 5.22891 4.65263  27
  -5   8  -7 7.27899 6.24062  27
  -8   7  -5 9.41401 5.40328  27
  -5   7   8 13.4129 4.18571  13
   5   7  -8 6.50454 3.03378  15
  -7   8   5 9.63613 4.02846  13
  -8   5   7 4.71003 3.49396  13
   8   7   5 1.46436 3.59490   7
  -5   7   8 5.51002 3.07799   6
   5   8   7 11.0601 4.55011   7
  -7   8   5 4.42587 3.75605   6
   5  -7   8 9.54826 1.66492  26
   7   8  -5 3.06371 3.89676  24
  -7   5  -8 8.76641 5.24662  25
   8  -5   7 7.69052 1.90111  26
   8   5  -7 10.6570 4.51816  24
  -7  -8  -5 1.92635 5.02360  23
  -8  -5  -7 10.8089 6.32613  23
  -7  -8  -5 3.47223 4.73277  21
   7  -5  -8 1.33378 3.85330  22
   5  -7   8 6.53756 2.40516  20
  -7  -5   8 6.53419 2.26112  20
  -5  -8   7 4.19816 2.09754  20
   7  -8   5 6.80350 2.44325  20
  -5  -7  -8 11.0768 5.40199  21
  -5  -7  -8 2.27600 2.07868  19
  -8  -5  -7 8.29862 2.19108  19
   7  -5  -8 8.21638 3.30801  15
   7  -8   5 9.03895 2.58667  16
   5  -7   8 2.76701 2.64815  16
  -5  -8   7 11.3925 2.99739  16
   5  -8  -7 5.31222 3.64653  15
   8  -7  -5 3.41844 3.35172  15
   5   7  -8 7.28098 3.57725   7
   7   8  -5 4.90756 3.74070   7
  -5   7   8 5.01142 3.13513   8
   8   7   5 4.34197 4.96264   8
   5   8   7 4.71781 4.38056   8
   7   5   8 6.60230 4.75248   8
   8   5  -7 12.7178 3.71164   7
  -8   7  -5 11.2759 2.60983  10
  -7   5  -8 4.85410 2.28006   9
  -8   5   7 3.36527 2.52850  11
  -5  -7  -8 4.69402 2.68072   9
  -7   8   5 7.58872 3.29579  11
  -8  -5  -7 3.86801 2.52822   9
  -8   7   7 53.6563 6.95731   6
  -7  -8   7 45.0503 6.76820   5
  -8  -7   7 61.0040 7.39869   5
  -7  -7   8 60.5241 7.25888   5
  -7   7   8 47.9127 6.78245   6
   7  -8  -7 42.9432 7.84898   3
   7  -7  -8 42.3998 7.41766   3
  -7   7  -8 52.9870 8.98101  27
  -8   7  -7 31.2864 8.13108  27
  -7   8  -7 39.9933 9.36457  27
  -7   8   7 68.8531 7.86495  13
  -7   7   8 72.9591 8.04676  13
  -8   7   7 65.2950 7.78439  13
   7   7  -8 42.3984 6.47160  15
   7   7   8 46.8065 7.44574   7
  -7   8   7 43.3706 7.02981   6
   7   8   7 54.3535 7.53745   7
   7   8  -7 45.9145 7.88767  24
   8   7  -7 51.7317 8.04899  24
   7  -7   8 51.2000 5.25083  26
   8  -7   7 45.1832 5.27181  26
   7  -8   7 51.3423 5.33068  26
  -7  -8  -7 38.0969 8.91105  23
  -8  -7  -7 39.2216 9.07372  23
  -7  -7  -8 45.4002 9.15851  23
  -7  -8  -7 40.7956 8.17686  21
  -8  -7  -7 57.4680 7.83713  21
  -7  -7  -8 51.9376 7.86546  21
   7  -7   8 46.5569 5.96108  20
   8  -7   7 46.8630 5.90880  20
   7  -8   7 43.6208 5.86692  20
  -7  -7  -8 49.2625 5.82247  19
   8  -7   7 40.4189 5.68855  16
   7  -8   7 51.1673 6.09102  16
   8  -7  -7 41.2124 6.74302  15
   7  -7   8 40.9111 5.72335  16
   7  -7  -8 46.9882 6.88267  15
   7  -8  -7 61.4468 7.42993  15
   8   7  -7 52.2740 7.29233   7
   7   7   8 56.8888 8.29960   8
   8   7   7 37.7377 7.97210   8
  -7  -7  -8 51.0814 6.13549   9
  -8  -7  -7 60.2675 6.19931   9
  -7   8   7 59.0706 7.05580  11
  -7   7   8 55.2956 6.75415  11
  -8   7   7 63.0686 6.90866  11
  -8   0   8 377.858 39.5689   5
  -8  -8   0 375.510 39.1830   5
  -8  -8   0 390.275 39.4078   4
   8   0  -8 468.994 39.8792   1
  -8   0   8 406.110 39.1107   2
   8  -8   0 430.441 39.8739   3
   0   8  -8 498.902 42.6600  27
  -8   8   0 420.762 40.2269  27
   8  -8   0 399.789 39.5719  30
  -8   0  -8 386.867 39.7320  27
   8   0  -8 455.919 39.0492  28
  -8  -8   0 358.397 39.3385  12
   0   8   8 391.410 40.0734  13
  -8   0   8 502.791 39.7841  13
  -8   8   0 497.306 40.0089   6
   8   8   0 571.013 40.0620  24
   8   0  -8 428.650 39.5861  22
  -8  -8   0 388.800 40.4637  23
   8  -8   0 454.449 39.6143  20
   0  -8   8 470.135 39.1340  20
  -8   8   0 462.770 40.0154  18
  -8   0  -8 509.847 39.1696  19
   8   0   8 334.737 39.3105  17
   0  -8   8 441.840 39.2181  16
   8   0  -8 508.273 39.4823  15
   0  -8  -8 431.633 39.7232  15
   8   8   0 441.691 39.9131   7
   0   8   8 460.379 40.2743   7
   0   8  -8 426.578 39.0105   7
  -8   0  -8 500.781 39.4266   9
  -8   8   0 433.699 39.3364  11
   0   8   8 466.359 39.8996   8
  -8  -8  -2 40.9500 6.52643   5
  -2  -8   8 58.4837 6.99815   5
  -8  -2   8 64.2425 8.01402   5
  -8   2   8 61.7377 6.74223   5
  -8  -8   2 56.8439 7.28425   5
  -8   2   8 51.5596 7.04110   2
  -8  -2   8 72.7329 7.21362   2
  -8  -8  -2 47.8036 7.09940   4
   8   2  -8 77.6524 8.09879   1
   2  -8  -8 55.0722 7.93066   3
   8  -8  -2 50.2327 7.83561   3
  -8   8  -2 75.0483 9.33718  27
  -8   2  -8 49.5304 7.94612  27
  -8   8   2 51.6919 7.49370  27
   8  -2  -8 60.4084 6.78710  28
  -8   2   8 64.1158 7.46416  13
  -8  -8   2 63.9646 7.50228  12
  -2   8   8 49.6501 7.65774  13
  -2   8   8 54.5007 7.95034   7
  -8   8   2 75.2998 8.11670   6
   8   8   2 55.8262 7.83325   7
  -8   8  -2 65.4827 7.43552   6
   2   8   8 49.6732 7.95704   7
  -2   8  -8 52.8421 9.10949  25
   8   2  -8 37.3841 7.62907  24
  -2   8  -8 62.8017 10.7450  27
   8   8  -2 74.9682 7.84657  24
   8  -2   8 62.0904 6.13417  26
   8  -2  -8 63.1959 7.45462  22
   8   2  -8 82.6317 7.95100  22
  -8  -8  -2 38.6240 7.92862  23
   8  -8   2 68.1469 7.11781  20
  -2  -8  -8 58.9850 8.95430  21
  -2  -8   8 54.8036 6.40737  20
   2  -8   8 61.7245 6.75993  20
   8  -2   8 60.4163 7.46274  17
  -8   8  -2 60.8040 7.43261  18
  -8  -2  -8 59.9075 6.50041  19
   2  -8   8 53.9429 6.76728  16
  -8   2  -8 69.1355 6.66748  19
  -2  -8   8 60.4761 6.86633  16
   8  -2  -8 68.4473 7.23296  15
   8   2  -8 72.9718 7.42254  15
   2   8  -8 60.2266 7.39976  15
  -2   8  -8 63.7374 7.50082  15
  -2  -8  -8 64.5982 7.42360  15
   8   8  -2 66.4143 7.90292   7
   2   8  -8 50.3184 6.83937   7
   8   2   8 46.4627 7.72075   8
   2   8   8 54.7930 7.98446   8
  -8  -2  -8 65.5099 6.99701   9
  -2   8   8 58.2346 7.47916   8
  -8   2  -8 61.1889 6.70111   9
   8   8  -2 54.3935 7.66533   8
  -8   8   2 47.5558 6.99535  11
  -8  -8   4 86.4282 11.2098   4
  -4  -8   8 119.667 11.6278   5
  -8  -4   8 128.687 12.5599   5
  -8  -8  -4 91.8256 11.4545   4
  -8  -8   4 110.659 11.8021   5
  -8   4   8 135.897 11.7879   2
   8  -8  -4 111.297 12.3980   3
  -8  -4   8 88.4588 10.9962   2
   4  -8  -8 118.218 12.3877   3
   8   4  -8 121.042 12.2447   1
  -8   4  -8 84.2852 12.8181  27
  -4   8  -8 127.309 14.6504  27
   8  -4  -8 117.637 11.2889  28
  -8   8  -4 141.781 14.0623  27
  -8   4   8 140.863 12.3854  13
  -4   8   8 95.6806 12.1107  13
  -8  -8   4 147.040 12.1597  12
  -8  -4   8 118.152 11.0358  14
  -8   8   4 118.181 11.8005  13
  -8   8   4 102.998 11.9900   6
  -8   8  -4 122.944 11.5519   6
  -4   8   8 104.381 11.6832   6
  -8   4   8 106.492 11.2079   6
   8   8  -4 120.900 12.3126  24
   8  -4   8 120.675 10.5551  26
  -4   8  -8 96.1757 13.0427  25
  -4  -8  -8 126.432 13.5589  21
   8  -4  -8 91.5812 11.5754  22
  -8  -8  -4 85.4589 12.6070  23
  -8  -8  -4 88.9601 11.9018  21
   8  -8   4 117.602 11.3288  20
  -4  -8  -8 60.7938 10.5816  19
  -4  -8   8 104.095 10.7487  20
   4  -8   8 113.173 11.1103  20
   8  -4   8 96.3848 12.1329  17
  -4  -8   8 115.746 11.0970  16
  -8   8  -4 121.674 11.9026  18
  -8  -4  -8 122.722 10.9561  19
   4  -8   8 103.022 11.0424  16
  -8   4  -8 129.914 11.4414  19
   4   8  -8 113.092 11.5509  15
   8  -8  -4 118.611 12.0692  15
   4  -8  -8 107.720 11.9758  15
  -4  -8  -8 95.0265 11.1104  15
   8  -4  -8 141.253 11.7623  15
   8   8   4 113.579 12.1900   7
   4   8  -8 93.8378 11.2783   7
   4   8   8 121.805 12.6087   7
   8   8  -4 100.041 11.7251   7
  -8   4   8 110.647 11.0818  11
  -4   8   8 112.512 11.3867   8
  -8  -4  -8 125.620 11.4752   9
  -8   4  -8 118.378 11.3091   9
  -8   8   4 125.767 11.9330  11
   8   4   8 109.751 12.6973   8
   4   8   8 123.723 12.8535   8
  -6  -8   8 4.51294 3.35727   5
  -8  -6   8 1.62175 3.92575   5
  -8  -8   6 2.43439 3.40503   5
  -8   6   8 15.1222 3.92270   6
   6  -8  -8 4.93893 5.33674   3
   8  -8  -6 11.5353 5.08357   3
   8  -6  -8 4.32191 4.48927   3
  -6   8  -8-0.86874 7.15102  27
  -8   6  -8 4.12823 5.35147  27
  -8   8  -6 8.88037 6.05020  27
  -6   8   8 10.0837 4.64974  13
  -8   8   6 4.80277 3.97611  13
  -8   6   8 14.2368 4.34628  13
   6   8  -8 6.49325 3.54632  15
  -6   8   8 5.11772 3.70662   6
  -8   8   6 2.01135 4.14757   6
   6   8   8 2.21572 4.32333   7
   8   8   6 4.36773 4.21412   7
   8   6  -8 10.3374 5.30672  24
   8  -6   8 6.92100 1.92914  26
   8   8  -6-0.59910 4.31264  24
  -6  -8  -8 12.6823 6.56924  23
  -8  -6  -8 28.8767 7.95310  23
  -8  -8  -6 10.8593 4.70135  21
   8  -6  -8 11.0964 4.54511  22
  -8  -8  -6 6.80056 5.80351  23
   8  -6   8 8.87802 2.65653  20
   6  -8   8 4.55085 2.58369  20
   8  -8   6 9.93826 2.83955  20
  -6  -8  -8 10.5992 5.39971  21
  -6  -8  -8 9.58520 2.69952  19
  -8  -6  -8 8.65252 2.52923  19
   8  -6   8 7.12582 2.81847  16
   8  -6  -8 0.43985 3.39440  15
  -6  -8   8 8.95153 2.95759  16
   6  -8   8 7.43304 2.93159  16
   8  -8  -6 9.49742 3.97531  15
   6  -8  -8 8.07684 4.16342  15
   8   6  -8 11.2253 4.04853   7
   6   8  -8 2.81502 3.67589   7
   8   8   6 5.48887 4.86135   8
   8   6   8 9.97363 5.54207   8
   8   8  -6 9.95499 4.18850   7
  -8  -6  -8 4.03368 3.03770   9
  -8   6   8 4.38108 3.08432  11
  -8   8   6 6.19444 3.23992  11
  -6   8   8 6.37145 3.54518  11
  -6  -8  -8 10.7254 2.89111   9
  -8  -8   8 134.232 12.8786   5
   8  -8  -8 104.618 12.9691   3
  -8   8  -8 97.9021 14.2622  27
  -8   8   8 141.127 13.2670  13
  -8   8   8 101.658 12.0799   6
   8  -8   8 109.948 10.7252  26
  -8  -8  -8 91.2991 14.5874  23
   8  -8   8 109.121 11.4041  20
   8  -8   8 105.845 11.3927  16
   8  -8  -8 108.449 12.4363  15
   8   8  -8 126.527 12.9586   7
  -8   8   8 123.496 12.2775  11
   8   8   8 114.282 13.5979   8
  -9   0   1 19.2577 3.09172   5
  -9  -1   0 18.2802 3.25789   5
  -9   1   0 17.8252 3.02165   5
  -9   0  -1 20.2803 3.29774   5
  -9  -1   0 17.5398 3.03727   2
   0   1  -9 20.1285 2.66107   1
   9   1   0 15.2374 3.06623   1
  -9   1   0 13.4666 3.10429   2
  -9   0  -1 14.0500 2.92100   2
   1   0  -9 16.0459 2.69800   1
   9   0  -1 17.1357 3.22761   1
  -9   0   1 17.0847 3.15954   2
   9   0  -1 23.5375 3.42338  29
   9   1   0 14.3703 3.14389  29
   9  -1   0 18.4098 3.28200  29
  -9   0  -1 14.9546 4.05521  27
  -9   1   0 14.6347 3.76281  27
  -9   1   0 14.7580 2.90567  14
  -9   0  -1 14.4529 2.97378  14
   1   0   9 13.1113 3.88914  13
   0   1   9 15.9934 3.90172  13
   0  -1   9 19.6187 3.54836  13
  -1   0   9 18.2239 3.54714  13
  -9   0   1 21.5616 3.11098  14
  -1   9   0 18.2365 3.71325   7
   0   9  -1 15.6784 3.60268   7
   1   9   0 12.6985 3.86706   7
   1   9   0 16.0938 4.11608   6
   0   9  -1 15.6909 4.21091   6
   0   9   1 18.8788 3.93878   7
  -1   9   0 11.0364 3.99906   6
   0   9   1 17.5321 4.37704   6
   9   0  -1 21.2921 2.47862  26
   0   1  -9 14.2137 3.90063  25
   1   0  -9 9.86414 3.50806  25
   9   1   0 16.1540 2.38572  26
   9  -1   0 20.7454 2.43297  26
  -1   0  -9 21.4472 4.12296  25
   0  -1  -9 7.47860 3.57260  25
   9   0   1 19.1678 2.42900  26
  -1  -9   0 13.9661 4.43537  21
   0  -9   1 18.3716 3.85795  21
   9   0  -1 20.2069 3.29661  24
   9  -1   0 25.3215 3.22219  24
  -9  -1   0 11.0192 3.78112  23
  -9   0   1 23.9977 3.90472  23
   0  -1  -9 15.9749 3.73263  22
  -1   0  -9 21.3525 3.68990  22
  -9   0  -1 9.21551 3.91693  23
   0   1  -9 19.9100 3.64542  22
  -9   1   0 15.7029 3.59619  23
   1   0  -9 16.8652 3.71909  22
   1  -9   0 17.3576 3.95899  21
   0  -1   9 16.6358 2.78507  20
   0   1   9 19.4195 2.78889  20
   1   0   9 16.5556 2.69081  20
  -1   0   9 16.1354 2.74085  20
   0  -9  -1 16.6133 4.04767  21
   0  -9   1 16.4228 2.98840  20
   1  -9   0 14.4068 3.16964  20
  -1  -9   0 16.5501 3.30381  20
   1   0   9 19.6664 3.83098  17
  -1   0   9 11.5593 3.51196  17
   0  -1   9 21.2587 3.97137  17
  -9   0  -1 19.6535 2.44382  18
  -9   1   0 17.1475 2.59686  18
   1   0  -9 17.9272 2.62721  19
   0  -1  -9 15.2899 2.65379  19
  -1   0  -9 13.7947 2.60798  19
   0   1  -9 19.6617 2.76650  19
   0  -1  -9 15.3744 2.95671  15
  -1   0  -9 15.8237 2.87201  15
   0  -9   1 14.1529 3.15512  16
   0   1  -9 17.5654 3.01630  15
   1   0   9 16.1181 3.76150   8
   0   1   9 15.6128 3.67470   8
   0   9  -1 16.5970 2.94910   8
   0  -1   9 15.7759 3.40404   8
   1   9   0 24.4782 3.73965   8
  -1   0   9 25.2710 3.69961   8
   0   9   1 17.2559 3.37806   8
  -9   1   0 15.5580 2.99164  10
  -9   0   1 23.0954 2.99633  10
  -9   0  -1 19.7164 3.07193  10
  -9  -1   0 19.9633 3.02868  10
   9   0   1 12.2384 3.56275   8
   9   1   0 15.0619 3.76729   8
  -9   2   1 93.7479 9.34064   5
  -9  -1   2 88.7106 9.62707   5
  -9  -2  -1 100.191 9.88638   5
  -9   1  -2 102.472 9.62214   5
  -9   2   1 78.4127 9.51631   2
  -9   1  -2 87.2964 9.39400   2
  -9  -1   2 87.0384 9.48979   2
  -9  -2  -1 78.8303 9.25664   2
   2   1  -9 100.867 9.34231   1
   9   2  -1 95.3881 9.66414   1
  -9   2   1 74.3797 9.85936  27
  -9   1  -2 81.6669 10.3208  27
   9  -1  -2 121.697 10.2204  29
   9   1   2 107.455 9.72712  29
   2  -9  -1 82.3911 9.62624  30
  -2   9  -1 111.768 11.6015  27
   9   2  -1 98.9767 9.77615  29
   9  -2   1 91.7923 9.48084  28
   1   2   9 86.3916 10.5500  13
  -2   1   9 120.788 10.3034  13
  -1  -2   9 89.4654 9.53830  13
  -1  -9  -2 98.1534 10.1047  12
  -9   2   1 98.4184 9.48712  14
  -9  -1   2 103.062 9.62566  14
   2   9   1 82.8480 10.0960   6
  -1   9   2 118.410 10.8784   6
   9   2  -1 143.673 10.5131  24
  -2  -1  -9 88.1573 10.3271  25
   1  -2  -9 78.3482 9.85795  25
  -1   2  -9 96.4535 10.3914  25
   2   1  -9 86.3938 9.99685  25
   9   2  -1 102.793 9.11333  26
   9   1   2 106.791 9.16797  26
   9  -1  -2 105.744 9.09938  26
   9  -1  -2 105.522 9.76056  24
   9  -2   1 105.559 9.12457  26
  -9   2   1 110.747 9.79488  23
  -2  -1  -9 91.0583 9.85278  22
   1  -2  -9 97.4415 10.2436  22
  -1   2  -9 90.7172 9.59741  22
   2  -9  -1 75.3342 10.0175  21
   2   1  -9 103.483 10.0168  22
   1  -9   2 85.0975 9.83758  21
  -9   1  -2 96.1766 10.6378  23
  -2  -9   1 83.4789 10.2385  21
  -9  -2  -1 90.0183 10.6623  23
  -1  -9  -2 81.2583 10.4162  21
  -2  -9   1 104.800 9.41602  20
   1  -9   2 102.964 9.75690  20
   1  -2  -9 96.4744 9.41600  19
   2  -1   9 100.954 9.34554  20
   1   2   9 88.1318 9.25134  20
  -1  -2   9 93.5728 9.36354  20
  -1  -2   9 90.9176 10.0023  17
  -2  -1  -9 101.330 9.40534  19
   2   1  -9 109.573 9.28112  19
   1   9  -2 97.2196 9.81028  18
  -1   2  -9 104.125 9.33506  19
  -2   9  -1 96.5819 9.94491  18
   1  -9   2 117.542 9.97394  16
  -2   1   9 78.7327 9.67927  17
   2   1  -9 97.4588 9.61888  15
  -1   2  -9 95.1378 9.52286  15
  -2  -1  -9 99.2085 9.41622  15
   1  -2  -9 94.7409 9.67962  15
   1   9  -2 96.0520 10.0074   7
  -1   9   2 99.8781 10.3515   7
   2   9   1 97.3416 10.3147   7
  -2   9  -1 79.5416 9.68913   7
   1   2   9 97.6514 10.2770   8
   2  -1   9 95.3720 9.78956   8
   1   9  -2 81.4096 9.45187   8
   9   1   2 68.8094 10.0631   8
  -2   1   9 106.903 10.0428   8
   2   9   1 93.0088 9.92655   8
  -1  -2   9 101.679 9.65962   8
  -1   9   2 100.238 9.64110   8
  -9  -1   2 109.965 9.47149  10
  -9   1  -2 103.557 9.59485  10
  -9   1   2 97.1891 9.40159   5
  -9   2  -1 110.129 9.49759   5
  -9   2  -1 84.0225 9.43425   2
   9   1  -2 120.389 9.92767   1
  -9   1   2 70.3222 9.32307   2
  -9  -1  -2 72.9739 9.08931   2
  -9  -2   1 78.8362 9.29660   2
   1   2  -9 95.5219 9.23469   1
   1  -9  -2 92.9355 9.57194  30
  -9  -1  -2 85.4515 10.2134  27
  -9   2  -1 85.1645 10.2379  27
   9  -2  -1 102.494 9.81176  29
   9   2   1 100.384 9.53002  29
   9  -2  -1 100.078 9.55142  28
  -2   9   1 89.4736 10.2848  27
  -2   9   1 63.5853 9.30162  13
  -1   2   9 102.584 10.3300  13
  -2  -1   9 92.6192 9.71222  13
   1  -9  -2 102.389 9.98468  12
  -2  -9  -1 91.0704 10.0618  12
  -9   1   2 88.4057 9.41004  14
  -9  -2   1 92.0600 9.45846  14
  -9   2  -1 83.8907 9.27771  14
  -1   9  -2 100.281 10.7924   6
   1   9   2 108.320 10.3957   6
  -2   9   1 100.009 10.6845   6
   9   1  -2 120.847 10.1247  24
  -2   1  -9 78.5289 10.0499  25
  -1  -2  -9 87.9391 10.3551  25
   2  -1  -9 90.8806 9.80970  25
   1   2  -9 95.6990 10.1617  25
   9   2   1 105.627 9.08811  26
   9   1  -2 113.185 9.03757  26
   9  -1   2 101.372 9.05080  26
   9  -2  -1 105.944 9.04509  26
   9  -2  -1 112.171 9.57320  24
  -1  -2  -9 89.3643 9.95007  22
  -9   2  -1 87.3821 9.87332  23
  -2   1  -9 91.0962 9.48414  22
   2  -1  -9 90.1681 10.0608  22
   1   2  -9 88.5301 9.67241  22
  -1  -9   2 96.0191 10.1016  21
  -9  -1  -2 85.1380 10.7653  23
   2  -9   1 89.0827 9.89087  21
  -2  -9  -1 86.6790 10.4011  21
  -9  -2   1 104.827 10.8625  23
   1  -9  -2 91.3653 10.5652  21
  -1  -9   2 89.1184 9.31216  20
   2  -9   1 98.0162 9.69184  20
  -2  -9  -1 101.363 9.38844  20
  -2  -1   9 103.220 9.38783  20
   2   1   9 92.3158 9.13055  20
   1  -2   9 104.667 9.34153  20
   2  -1  -9 102.132 9.25939  19
   1  -2   9 93.6926 10.1324  17
  -2  -1   9 94.1532 9.79201  17
  -1  -9   2 108.652 9.97480  16
  -1  -2  -9 103.540 9.37424  19
  -9   2  -1 92.3105 9.29190  18
  -1   9  -2 93.0623 9.73741  18
  -2   1  -9 109.632 9.36376  19
   1   2  -9 106.175 9.21634  19
   2  -9   1 99.8645 9.72447  16
  -1  -2  -9 93.8901 9.39453  15
   2  -1  -9 91.6053 9.56231  15
  -2   1  -9 87.3896 9.32877  15
   2   9  -1 100.584 10.1122   7
  -1   9  -2 99.1973 9.75107   7
   1   9   2 91.9741 10.1904   7
  -2   9   1 107.334 10.2090   7
  -1   2   9 101.835 10.0504   8
   9   2   1 85.3692 10.1522   8
   1  -2   9 95.6398 9.59949   8
   2   9  -1 90.2411 9.68418   8
   1   9   2 95.7204 9.89947   8
  -2  -1   9 102.020 9.64205   8
  -9   2  -1 97.9745 9.42790  10
  -9  -2   1 94.0550 9.29501  10
   2   1   9 91.4827 9.95758   8
  -9   3   2 54.4958 5.29971   5
  -9  -2   3 32.2944 5.71804   5
  -9  -3  -2 52.5408 5.98919   5
  -9   2  -3 54.4497 5.82303   5
  -9   2  -3 51.3983 5.56762   2
  -9   3   2 48.7882 6.04649   2
   9   3  -2 36.8119 5.72535   1
   2  -3  -9 55.7582 5.90547   3
  -3  -9   2 44.9487 6.39585   4
   3   2  -9 42.8431 5.64502   1
  -9   2  -3 46.2271 6.88365  27
   9  -3   2 59.4822 6.07071  30
   9  -2  -3 56.6112 6.14424  29
  -2   9   3 54.4808 6.09625  27
   9  -3   2 52.8994 5.69464  28
  -9   3   2 37.3371 5.86767  27
  -3   2   9 57.2134 6.51617  13
  -9  -2   3 55.2994 5.74970  14
  -9   3   2 46.5663 5.51947  14
  -2   9   3 34.3632 5.93350  13
  -2  -9  -3 45.2589 6.20850  12
  -3   9  -2 41.5064 6.89458   6
  -9   3   2 51.5919 5.61879   6
  -2   9   3 51.0666 6.82289   6
   3   9   2 38.0643 6.20791   6
  -3   9  -2 49.3946 7.80582  27
   9  -2  -3 48.7669 5.64125  24
   2  -3  -9 53.7111 6.29155  25
   9  -3   2 51.9620 5.12065  26
  -3  -2  -9 35.9351 6.52240  25
   9   3  -2 70.9293 6.61182  24
  -2   3  -9 44.2323 5.49178  22
  -9   2  -3 56.9179 7.08724  23
  -9  -3  -2 35.8626 6.96648  23
   3   2  -9 50.3821 6.24863  22
  -3  -9   2 48.0880 5.21761  20
   2  -9   3 48.5326 5.73964  20
  -2  -9  -3 46.9942 7.04265  21
   3  -9  -2 40.4752 6.32359  21
   2  -3  -9 45.6683 5.48919  19
   3  -2   9 50.7336 5.31677  20
   2  -9   3 56.4354 5.88505  16
  -3  -2  -9 47.1157 5.38844  19
  -3   9  -2 49.0269 6.04276  18
   3  -2   9 42.8185 6.28707  17
  -2   3  -9 53.1959 5.40575  19
  -3  -2  -9 53.1190 5.34356  15
   3   2  -9 52.8809 5.95786  15
  -2   3  -9 60.8445 5.88545  15
   2   3   9 48.7437 6.69224   8
  -3   9  -2 50.7858 5.61192   7
   9   3  -2 44.1867 5.70651   7
   9   2   3 35.7300 6.31031   8
  -2   9   3 57.8980 6.77385   7
   3   9   2 41.2123 6.33487   8
   2   9  -3 51.8550 6.24071   7
   2   9  -3 38.4754 5.64698   8
   3  -2   9 45.1229 5.68597   8
  -3   9  -2 40.7528 5.38802  11
  -2  -3   9 50.9381 5.71294   8
  -2   9   3 50.9695 5.64497   8
  -9   2  -3 48.7437 5.53479  10
  -9  -2   3 51.9861 5.46533  10
  -9   3   0 0.20149 1.74399   5
  -9   3   0 0.22307 1.85841   6
  -9   0   3 4.66703 2.18254   5
  -9  -3   0 4.30855 2.56199   5
  -9   3   0 1.44668 2.65936   2
   9   3   0 1.46753 2.44096   1
  -9   0  -3 2.11095 1.89567   2
   0  -3  -9 1.66197 2.42887   3
   3   0  -9 1.30636 2.32500   1
  -9   0  -3 2.96236 3.67791  27
  -9   3   0 1.93230 2.93524  27
   9  -3   0 0.53831 2.12818  28
   9   0  -3 1.01907 2.35550  29
   9   3   0 1.27886 1.95471  29
   9  -3   0 2.81810 2.40663  29
   0  -9  -3 2.22665 2.21806  30
   0  -9  -3-0.71991 2.47806  12
  -9  -3   0-2.53413 2.39127  14
  -3   0   9-0.96326 2.63425  13
  -3  -9   0 0.39103 2.86197  12
   0   3   9-0.91219 3.99965  13
  -9   3   0 0.23912 1.77304  14
   0   9   3 2.55401 3.27116   6
   0   9   3-1.24603 3.54349   7
   0   9  -3 5.56485 4.04845   6
   3   9   0 0.80247 3.15435   7
  -3   9   0 1.21337 2.67235   7
   0   9  -3 1.20697 2.56249   7
   0   3  -9-0.40490 3.47067  25
   0  -3  -9 4.01557 3.47548  25
   3   0  -9 1.26014 2.88364  25
  -3   0  -9 1.30027 3.96689  25
   9   0   3 2.59922 1.48635  26
  -3   9   0 3.21071 3.81966  27
  -3  -9   0-0.45409 3.14833  21
   0   3  -9 1.04604 2.41349  22
   3   9   0 1.38528 1.59086  24
  -9  -3   0 3.98989 3.98537  23
   0  -3  -9-0.75643 3.05488  22
   9   0  -3 1.90035 2.19638  24
  -9   3   0 2.01698 2.01540  23
  -3   0  -9-0.76924 2.24915  22
  -9   0  -3-2.09374 4.33722  23
   3   0   9-1.20201 1.71804  20
  -3  -9   0-0.60507 1.42907  20
   3  -9   0 2.23158 2.97235  21
   0  -3   9 0.92631 1.77001  20
   0  -9  -3 1.50125 3.39427  21
   0  -9   3 1.84533 2.03816  20
   0  -3   9-1.45743 2.92746  17
   3   0   9-2.74193 3.13031  17
   0  -3  -9 2.23694 1.78445  19
  -3   0   9-1.09231 2.39522  17
   0   9  -3-2.10893 2.28858  18
   3   0  -9 1.33863 1.40959  19
  -9   3   0-0.28124 1.79089  18
  -3   0  -9-0.22904 1.71950  19
   0   3  -9 0.79684 1.58430  19
   3   0  -9-1.37684 2.14111  15
   0  -3  -9-0.26341 2.01299  15
   0   3  -9 1.85517 2.15230  15
   0  -9   3 1.53707 1.97385  16
   3  -9   0 1.50159 2.36132  16
  -3   0  -9 1.88693 1.70308  15
   3   0   9 1.93996 2.86087   8
   0   3   9 0.73519 2.88999   8
   0   9   3 1.23321 2.85653   8
   0  -3   9-0.24668 2.34897   8
  -3   0   9 1.72913 2.59444   8
   3   9   0-1.07365 2.89071   8
   9   3   0-1.73978 3.36180   8
  -9   0   3-0.44490 1.91635  10
  -9   2   3 37.9666 5.11813   5
  -9  -2  -3 50.2046 5.81811   5
  -9   3  -2 61.3200 5.75438   5
  -9   3  -2 44.4810 5.69054   2
  -9  -2  -3 40.6255 5.09245   2
  -9  -3   2 33.5168 5.39199   2
  -2  -9   3 46.7514 6.34097   4
   9   2  -3 47.5344 6.05482   1
   2   3  -9 51.4956 5.62165   1
   9  -3  -2 52.1772 5.71456  28
   9  -3  -2 47.5717 5.92359  29
   9   3   2 52.6778 5.47431  29
  -3   9   2 54.3332 6.34685  27
   9  -2   3 44.4393 5.37453  28
  -3  -2   9 54.7783 5.80811  13
   2  -9  -3 38.7198 5.65924  12
  -3   9   2 45.6139 5.83158  13
  -9   2   3 41.3029 5.53835  14
  -9  -3   2 54.2111 5.77020  14
  -9   3  -2 38.2800 5.20041  14
  -3  -9  -2 50.1373 6.28882  12
  -2   3   9 48.9707 6.44270  13
  -3   9   2 58.6892 7.01818   6
  -9   3  -2 40.9521 5.04916   6
   2   9   3 45.0395 6.31569   6
  -2   9  -3 44.2631 7.22013   6
   3  -2  -9 46.0772 6.00182  25
  -2   9  -3 55.8687 8.55573  27
  -2  -3  -9 40.0253 6.42810  25
   3   9  -2 47.2598 5.54752  24
   9  -2   3 47.6467 5.03077  26
   9   2  -3 50.9802 6.13978  24
  -3  -9  -2 54.2201 7.11499  21
  -3   2  -9 47.1774 5.39188  22
   2   3  -9 54.9308 6.12692  22
  -9   3  -2 45.3802 6.07659  23
  -9  -2  -3 58.7743 7.88143  23
  -2  -9   3 45.8138 5.26360  20
  -3  -9  -2 46.7376 5.26464  20
  -2  -3  -9 60.3503 5.57085  19
   2  -9  -3 48.8259 6.92949  21
   3   2   9 43.7513 5.13316  20
  -3  -2   9 51.9619 5.47083  20
   2  -3   9 48.5469 5.32137  20
   3  -2  -9 59.1706 5.54552  19
  -9   3  -2 52.1035 5.52249  18
  -2   9  -3 50.1840 5.95385  18
   2   3  -9 57.5285 5.19887  19
  -3   2  -9 46.1618 5.31262  19
   3  -9   2 65.4392 5.98145  16
   2   3  -9 56.0083 5.84515  15
  -3   2  -9 52.2001 5.49597  15
  -2  -3  -9 39.7937 5.37255  15
   3  -2  -9 47.8313 5.83370  15
   3   2   9 49.6978 6.69672   8
   3   9  -2 54.2606 6.47465   7
  -2   9  -3 53.4877 5.76588   7
   9   3   2 47.3668 6.66278   8
   2   9   3 37.9806 6.14318   8
  -3   9   2 58.0609 6.71416   7
   9   2  -3 46.3322 5.72521   7
   3   9  -2 40.1390 5.89514   8
  -3   2  -9 62.8497 5.85756   9
   2  -3   9 48.3796 5.58349   8
  -2   9  -3 38.4324 5.11360  11
  -3  -2   9 55.8344 5.89796   8
  -9   3  -2 50.4318 5.60469  10
  -9  -3   2 49.4379 5.37350  10
  -9   4   3 1.62926 1.55889   5
  -4  -9   3 4.32296 2.43220   5
  -9  -4  -3 2.71919 2.73823   5
  -9  -3   4 0.85102 2.95690   5
  -3  -4   9 3.68628 3.15386   5
  -4   3   9 1.65745 2.38756   5
   4  -9  -3 5.92703 4.56165   3
  -9  -3   4 3.21841 2.27058   2
  -9   4   3 5.90750 3.14760   2
  -4  -9   3 2.78398 3.35063   4
   9   4  -3-0.31930 2.81979   1
   4   3  -9-2.54400 3.11389   1
   3  -4  -9 1.54351 3.07621   3
  -3   4  -9 1.74938 3.87440  27
   9  -4   3 2.84403 2.26964  28
   9  -3  -4 2.03830 2.62890  28
   9  -3  -4 3.65717 2.86607  29
  -9   3  -4 1.50271 4.37733  27
  -9   4   3 2.53914 2.81539  27
  -4   3   9 6.74902 3.46592  13
  -3   4  -9 2.63972 2.32742  15
  -9  -3   4 0.27204 2.18345  14
  -9   4   3 2.59787 2.30326  14
  -3   9   4-0.40952 3.31355  13
   3   4   9 1.76909 3.31011   7
  -3   9   4 6.80284 3.92949   6
  -4   9  -3 6.79949 4.02407   6
   4   9   3 0.47073 3.42862   7
   4   9   3 5.98371 3.29507   6
  -3   9   4 1.25483 3.78612   7
   9  -4   3 3.57612 1.56543  26
   3   9  -4 2.87571 2.78429  24
  -4  -3  -9 3.87261 4.47093  25
  -3   4  -9 1.51399 4.64188  25
  -4   9  -3 11.1641 5.44495  27
  -9   3  -4 8.22663 4.13313  23
   9   4  -3 0.83255 2.85164  24
   3  -4  -9-3.47827 4.08080  22
   4   3  -9-0.69863 3.31900  22
  -9  -4  -3-0.61954 4.81970  23
  -4  -9   3 0.18186 1.42862  20
  -3  -4   9 1.46980 1.99941  20
   4  -9  -3 1.42431 3.56804  21
  -4  -3  -9-6.87327 4.30020  21
   4  -3   9 1.68941 2.01034  20
   3  -9   4 3.46703 2.45847  20
  -3   4  -9 0.97385 1.89288  19
  -4   9  -3 1.16061 2.61225  18
  -4  -3  -9 4.20465 2.12113  19
   4  -3   9 4.13560 3.27520  17
   3  -4  -9 4.70559 2.86109  15
   3  -9   4 3.55294 2.41246  16
   4   3  -9 2.12543 2.49902  15
  -3  -4   9 1.53989 1.84344  16
  -4  -3  -9 3.58692 1.84280  15
   9   3   4 3.05605 4.07493   8
  -4   3   9 7.63321 3.00673   8
   9   4  -3-1.34733 2.74222   7
   4   9   3 8.36389 4.07955   8
   3   9  -4 6.30326 3.09429   7
   3   4   9 1.83225 3.85724   8
  -9   3  -4 0.79519 2.17286  10
  -3  -9  -4 3.78280 2.98258  12
  -3   4  -9 3.46671 2.06208   9
  -4   9  -3 6.68152 2.00750  11
  -9  -4  -1 6.25889 2.71116   5
  -9   1  -4 11.2268 3.00385   5
  -9   4   1 12.4159 2.19226   5
  -9  -1   4 11.4024 3.14445   5
  -9   4   1 10.7895 2.84365   6
  -4   1   9 11.6445 3.61263   5
  -9  -1   4 8.25693 2.95380   2
  -4  -9   1 10.0145 3.70026   4
   4   1  -9 8.16656 2.78257   1
   9   4  -1 13.1974 3.18191   1
  -9   4   1 13.5997 3.47854   2
   1  -4  -9 9.71268 2.93020   3
   4  -9  -1 8.59686 3.26974  30
   9  -4   1 7.50309 2.63578  28
  -9   4   1 8.25327 3.55257  27
  -9   1  -4 10.1112 4.33761  27
  -1  -9  -4 9.74336 2.55661  30
  -4   1   9 8.24264 3.15882  13
  -1   4  -9 12.3165 2.92265  15
  -9  -1   4 10.2451 2.53625  14
  -9   4   1 7.84027 2.34656  14
  -1   9   4 0.42847 3.42936  13
  -4   9  -1 3.49906 3.99769   6
  -1   9   4 2.67251 3.38229   6
   4   9   1 7.88126 3.68416   7
  -1   9   4 3.47363 3.72488   7
  -1   4  -9 5.03781 4.02972  25
   9  -1  -4 2.59307 2.52714  24
  -4  -1  -9 6.07611 3.92309  25
  -1   4  -9 9.42760 4.31880  27
   1  -4  -9 9.85443 3.87288  25
   9   1   4 13.7087 2.16231  26
  -4   9  -1 10.5511 4.98077  27
  -4  -9   1 6.74850 3.51496  21
   9   4  -1 16.4034 3.35161  24
  -1   4  -9 2.66783 2.56930  22
   1  -4  -9 6.81781 3.90541  22
  -9   1  -4 14.9543 4.78183  23
  -1  -9  -4 4.98493 4.39174  21
   4  -1   9 7.37580 1.98973  20
  -4  -9   1 14.3965 2.12529  20
   1  -9   4 7.10590 2.50138  20
  -1   4  -9 6.22722 1.99869  19
  -1  -4   9 7.81221 2.26426  16
  -9   1  -4 10.1057 1.88747  19
   4  -1   9 4.85220 3.31397  17
  -4   1   9 7.30118 2.63212  17
  -4   9  -1 5.56181 2.88879  18
   1  -9   4 7.80666 2.53453  16
   1  -4  -9 9.16837 2.92556  15
  -4  -1  -9 7.27002 2.10724  15
   4   1  -9 14.2267 2.88075  15
   1   4   9 6.19182 3.59766   8
   4  -1   9 8.56143 3.02399   8
   1   9  -4 5.21012 2.94907   7
   9   1   4 9.33574 3.82803   8
  -4   1   9 9.20851 3.18069   8
   4   9   1 4.47902 3.40360   8
   9   4  -1 8.12896 2.80624   7
  -1   9   4 11.0882 3.21138   8
  -9  -1   4 11.0130 2.28432  10
   9   4  -1 8.62247 3.64256   8
  -9   1  -4 9.30968 2.71000  10
  -1  -9  -4 2.69623 2.78845  12
  -4   9  -1 7.78336 2.58188  11
  -9   4  -1 8.80969 2.32165   5
  -9   4  -1 7.55136 2.35224   6
  -9   1   4 7.60154 2.29967   5
  -9  -1  -4 12.5652 3.05847   5
  -9  -4   1 4.38192 2.76056   5
  -4  -1   9 6.03535 3.37881   5
   9   1  -4 8.23621 3.45522   1
  -9   1   4 8.73263 2.94237   2
  -9   4  -1 14.0364 3.26460   2
  -4  -9  -1 5.72895 3.65661   4
  -1  -9   4 19.7385 3.77121   4
   9  -4  -1 7.05639 2.89925  28
  -9   4  -1 7.12730 4.17889  27
   9   4   1 6.85686 2.35831  29
   9  -4  -1 12.1876 2.98412  29
  -9  -1  -4 3.96378 3.81491  27
  -9   4  -1 7.14656 2.14144  14
  -9  -4   1 7.42033 2.53841  14
  -1   4   9 5.73506 3.89286  13
  -4  -1   9 8.68293 2.82087  13
   1   9   4 4.58936 3.45314   6
  -1   9  -4 7.67656 2.68863   7
  -1   9  -4 11.9128 4.44124   6
  -4   9   1 4.75221 3.10926   7
   9   1  -4 5.56912 2.66491  24
   4  -1  -9 8.99577 3.16485  25
  -4   9   1 9.97865 4.24461  27
  -1  -4  -9 6.79835 3.83851  25
   9  -1   4 6.98946 1.82447  26
  -9  -1  -4 4.84812 5.20033  23
  -4  -9  -1 10.3754 3.73869  21
   4   9  -1 22.6768 2.98435  24
   1   4  -9 6.52824 2.94995  22
   4  -1  -9 14.2672 3.81266  22
  -4  -9  -1 8.59339 3.75936  23
   4  -9   1 6.82438 2.66954  20
  -4  -1   9 12.5147 2.46583  20
   4   1   9 6.88196 1.88625  20
   1  -9  -4 5.90522 4.26377  21
  -1  -9   4 9.03421 2.24174  20
   1  -4   9 11.0793 2.34153  20
   1   4  -9 10.2241 2.11081  19
  -9  -1  -4 9.90863 1.69648  19
   4  -1  -9 10.8241 2.22372  19
  -1  -4  -9 5.98199 2.22203  19
  -9   4  -1 13.4467 2.54557  18
  -4   1  -9 13.1651 2.50696  19
  -1   9  -4 9.85474 2.87626  18
  -1  -4  -9 5.68976 2.49331  15
  -1  -9   4 4.38848 2.57744  16
  -4   1  -9 12.3167 2.46591  15
   4  -9   1 8.20298 2.61110  16
   4  -1  -9 10.1650 3.03711  15
   4   1   9 5.55876 3.51521   8
   1   9   4 4.46844 3.39392   8
   1  -9  -4 5.63549 2.62193  12
  -4   1  -9 13.3736 2.87160   9
  -4   9   1 8.94456 3.09917  11
   9   4   1 5.70414 3.33465   8
   4   9  -1 16.3822 3.71810   8
  -9   4  -3 3.87998 1.94623   6
  -3  -9   4 6.44722 2.44226   5
  -9   3   4-0.29681 2.47642   6
  -9  -3  -4 3.50207 2.84313   5
  -9  -4   3-1.27330 3.33033   5
  -9   3   4 3.73032 1.76583   5
  -4  -3   9 4.82371 3.36239   5
  -9  -3  -4 5.60553 1.96941   2
  -3  -9   4 6.15025 3.32258   4
   3   4  -9-0.56802 3.03668   1
  -9   3   4 4.92040 2.94168   2
   9   3  -4 2.63557 3.34461   1
   9  -4  -3 3.34213 2.68004  28
  -4   3  -9 1.60424 3.54433  27
  -4   9   3 0.32596 3.18593  27
   9  -4  -3 6.37152 2.73790  29
   9   4   3 3.17098 2.15950  29
  -4   3  -9 3.23842 2.51685  15
  -4   9   3 1.07321 3.07980  13
  -9  -4   3 3.05068 2.39473  14
  -4  -3   9 3.54211 2.35336  13
  -3   4   9 2.26659 3.61430  13
  -4   9   3 7.12404 3.98903   7
  -3   9  -4 8.20812 4.35842   6
   4   3   9 5.32159 3.04972   7
   3   9   4 5.73888 3.89325   7
   3   9   4 2.44925 3.54309   6
  -4   9   3 1.47331 3.76272   6
  -3  -4  -9-0.46078 3.97817  25
   4   9  -3 7.94914 2.98318  24
  -4   3  -9 8.28350 4.82372  25
   9   3  -4 2.89836 3.00489  24
  -9   4  -3 2.22067 3.21478  23
   4  -3  -9-2.85137 3.81452  22
   4  -9   3 1.32227 2.37408  20
  -3  -9   4 2.77157 1.72832  20
   3  -9  -4 3.16394 4.26839  21
  -3  -4  -9 2.98127 4.08584  21
   3  -4   9 5.61136 2.11231  20
  -4  -3   9 2.24851 1.95269  20
  -4   3  -9 5.01600 2.01439  19
   3  -4   9 4.59692 3.35179  17
  -3   9  -4-1.80810 2.77768  18
  -3  -4  -9 6.02348 2.27591  19
   3  -9  -4 1.74920 3.27388  15
   3   4  -9 1.83033 2.66687  15
   4  -3  -9 9.79991 2.97917  15
  -3  -4  -9 5.10945 2.19653  15
  -3  -9   4 0.68161 2.44650  16
   4  -9   3 4.38924 2.45394  16
  -4  -3   9 1.71411 1.82274  16
   9   3  -4 2.90540 2.87066   7
  -3   4   9 2.75391 3.15088   8
   9   4   3 7.10783 3.75016   8
   4   9  -3 0.80077 3.47564   7
   3   9   4 3.69618 3.91469   8
   4   3   9-0.92607 4.10651   8
  -9   4  -3 1.86447 2.18186  10
  -4  -9  -3 6.85100 3.08620  12
  -4   3  -9 5.49834 2.31890   9
   4   9  -3 6.90794 3.17282   8
  -5  -9   4 17.2023 3.52864   5
  -9  -5  -4 18.5955 3.68982   5
  -5   4   9 13.4125 3.19672   6
  -9   5   4 14.9303 3.92391   6
  -4  -5   9 18.1837 4.18108   5
   9   5  -4 18.1134 3.98770   1
   4  -5  -9 15.9961 4.33909   3
  -5   4   9 23.3498 3.81730   2
  -9  -4   5 22.2654 3.68095   2
  -5  -9   4 16.3407 4.01827   4
   5  -9  -4 28.5345 6.09779   3
   5   4  -9 10.4011 4.06414   1
   9  -4  -5 21.0647 3.71970  28
  -9   4  -5 26.0745 5.47497  27
  -4   5  -9 18.6949 5.78258  27
  -4   9   5 10.1096 4.11567  13
  -5   4   9 25.7824 4.76053  13
   4   9  -5 21.5347 3.94294  15
  -4   5  -9 19.9956 3.70598  15
  -9  -4   5 14.7059 3.22010  14
   4   5   9 19.0432 4.44587   7
  -4   9   5 14.3258 4.31259   7
  -4   9   5 15.9980 4.44956   6
  -5   9  -4 17.8306 5.10746   6
   5   9   4 20.7735 5.07306   7
   9  -5   4 17.3248 2.67836  26
  -5   9  -4 17.5947 6.46333  27
   5  -4   9 17.6524 2.31468  26
  -4   5  -9 25.4743 6.47108  25
   4  -5  -9 20.5495 5.17256  22
  -9  -5  -4 12.2302 5.85715  23
   5  -9  -4 16.7039 4.86020  21
  -4  -5   9 15.8544 2.85199  20
  -4  -9  -5 19.1102 5.59173  21
   4  -9   5 15.0123 3.23620  20
  -5  -4  -9 11.2524 4.73304  21
   5  -4   9 17.2062 3.02934  20
   5  -4   9 17.0691 4.56496  17
  -4   5  -9 16.3761 3.06698  19
  -5   9  -4 12.0088 3.59060  18
  -5  -4  -9 17.2400 3.07236  19
   4  -5  -9 23.2059 4.25374  15
  -4  -9  -5 22.7590 3.75239  15
   5  -9  -4 19.7755 4.53436  15
   4  -9   5 16.8649 3.40769  16
  -4  -5   9 19.7581 3.10990  16
   5   4  -9 22.5858 3.89517  15
   9   5  -4 16.1297 4.02103   7
   5   9   4 14.4475 5.04887   8
  -5   4   9 16.4052 3.72967   8
   9   4   5 13.7112 4.94764   8
   4   9  -5 11.4807 4.02205   7
   4   5   9 18.2545 5.54910   8
  -9   5   4 22.8525 3.52063  11
  -9   4  -5 8.57708 2.96893  10
  -5  -4  -9 25.1382 4.01461   9
  -4   5  -9 24.5547 3.27055   9
  -5   2   9 25.6598 4.60624   5
  -5  -9   2 31.2447 4.35906   5
  -9  -5  -2 24.3317 4.43406   5
  -9  -2   5 16.9099 4.62583   5
  -9   5   2 26.4815 4.58091   6
   5   2  -9 35.1596 4.93344   1
  -9  -2   5 35.2180 4.75460   2
   5  -9  -2 38.0340 6.35053   3
  -9   5   2 30.7973 5.13221   2
  -5   2   9 29.7261 4.38110   2
  -5  -9   2 36.6277 5.16719   4
   9   5  -2 28.8919 4.85587   1
   2  -5  -9 34.9960 5.11114   3
   9  -5   2 31.7931 4.63157  28
   9  -5   2 33.4754 4.82824  30
  -9   5   2 27.9039 4.80871  27
  -9   2  -5 36.4381 6.21588  27
   9  -2  -5 38.3690 4.53456  28
  -5   2   9 42.5902 5.28061  13
  -2   9   5 23.1217 5.20879  13
  -9   5   2 31.0516 4.26558  14
  -9  -2   5 31.7753 4.33515  14
   2   5   9 28.1815 5.28507   7
   5   9   2 31.7895 5.39550   7
  -2   9   5 42.5359 5.94248   7
  -5   9  -2 28.7102 5.51750   6
  -2   9   5 36.5397 5.65894   6
  -2   5  -9 25.8332 5.86954  25
  -5   9  -2 42.3493 7.35874  27
  -2   5  -9 37.1549 6.03435  27
  -5  -2  -9 17.9947 5.84840  25
   9  -2  -5 30.6589 4.51496  24
   9  -2  -5 26.3765 4.48104  22
   5   2  -9 22.9406 4.89794  22
  -2   5  -9 28.5329 4.05283  22
  -9  -5  -2 34.1854 6.24651  23
  -2  -9  -5 28.6132 6.18112  21
  -5  -2  -9 43.9432 5.87626  21
  -2  -5   9 30.9384 4.03581  20
   5  -2   9 30.4415 3.90445  20
  -5  -2  -9 35.2131 4.13278  19
  -2   5  -9 33.5825 4.02157  19
   5  -2   9 30.6305 5.10109  17
  -9   2  -5 34.0489 3.87501  19
  -5   9  -2 27.5782 4.75695  18
   5   2  -9 28.2966 4.52864  15
  -2  -9  -5 21.2214 4.60060  15
  -2   5  -9 36.6832 4.63531  15
   2   9  -5 42.9496 5.11540  15
   2  -9   5 22.8938 4.18431  16
  -5  -2  -9 34.5996 3.83242  15
  -2  -5   9 28.8645 4.14734  16
   9   2   5 34.8503 6.04870   8
  -2   9   5 23.4309 4.42924   8
   2   9  -5 35.8941 4.99112   7
   9   5  -2 35.4695 4.96051   7
   5   9   2 31.1036 5.54959   8
  -5   2   9 35.6808 4.74629   8
   2   5   9 32.0197 5.70904   8
  -5   9  -2 26.7101 4.09540  11
  -9   2  -5 38.1843 4.45937  10
  -9   0  -5 4.56162 3.06727   5
  -9   5   0 7.65008 2.15420   5
  -9   0   5 6.91055 2.62404   5
  -9   5   0 4.54232 2.48406   6
  -9  -5   0 2.59428 2.45788   5
  -5   0   9 2.64737 3.17565   5
   0  -9   5 2.18372 3.16476   4
   0  -5  -9 1.18285 2.84938   3
  -5   0   9 2.25073 2.23689   2
   9   0  -5 3.13429 3.28156   1
  -9   0   5 7.03312 2.91129   2
   5   0  -9 0.29174 3.20985   1
   9  -5   0 3.64994 3.30567   3
  -5   9   0 10.8017 4.38471  27
   9  -5   0 5.41801 3.03150  28
  -9   0  -5 0.93239 3.65025  27
  -9   5   0 7.07868 3.86977  27
   9  -5   0 8.49692 2.66213  29
   0   5  -9 9.06364 2.98535  15
   0   5   9 3.15275 4.28842  13
  -5  -9   0 8.60866 3.62875  12
  -5   0   9 5.02738 2.62754  13
  -9   0   5 6.20982 2.45915  14
  -9   5   0 6.35662 2.14686  14
   9   5   0 1.84783 2.90617   7
   5   9   0 5.75722 3.58480   7
  -5   9   0 3.06328 3.94757   6
   0   9   5 6.48889 3.50295   6
   0   9   5 6.60386 4.10414   7
  -5   0  -9-1.52023 4.13733  25
   0   5  -9 2.93407 4.03515  25
   9   0  -5 2.60386 3.03626  24
   0   5  -9 4.73999 4.65953  27
   5   0  -9 3.72384 3.32372  22
  -9   0  -5 8.38916 5.39145  23
   9   0  -5 6.83717 2.81766  22
  -5  -9   0 6.29411 3.61503  21
  -5  -9   0 6.79374 4.14349  23
  -9  -5   0 6.80973 4.35722  23
   5   9   0 6.93669 2.35226  24
   5  -9   0 8.22540 2.85655  20
   0  -9   5 4.69204 2.20214  20
   0  -5   9 5.15787 2.04143  20
   0  -9  -5 1.78063 4.19611  21
   0   5  -9 5.56353 1.95996  19
   5   0   9 3.83877 3.13233  17
  -9   0  -5 6.17930 1.58305  19
   0   9  -5 5.44995 2.40750  18
  -9   5   0 4.40724 2.37875  18
  -5   0  -9 9.83264 2.32141  19
   0  -9   5 7.39624 2.42225  16
   5   0  -9 5.57266 2.87891  15
   0  -5  -9 7.06170 2.94662  15
   0  -9  -5 2.86217 2.96693  15
  -5   0  -9 4.32903 2.02592  15
   0  -5   9 2.44675 2.21669  16
   0   5   9 8.35370 3.70515   8
   5   9   0 1.75291 3.29750   8
   0   9  -5 6.92972 2.75876   7
   0   9   5 2.96364 3.23480   8
   5   0   9 7.38198 3.36263   8
   9   5   0 9.29526 3.89182   8
   0  -9  -5 1.89384 2.75346  12
  -5   0  -9 4.61904 2.43908   9
  -5   9   0 5.34158 2.54224  11
  -5  -2   9 35.8530 5.45065   5
  -2  -9   5 26.1026 4.17660   5
  -9  -5   2 20.1798 4.60620   5
  -9   5  -2 30.0211 4.21422   6
  -9   2   5 33.6525 4.09516   5
  -9  -2  -5 35.0768 4.95092   5
  -5  -2   9 23.7035 4.07854   2
  -5  -9  -2 33.1729 5.56026   4
   9   2  -5 41.9572 5.50414   1
  -2  -9   5 34.4303 4.98856   4
  -9   2   5 25.9872 4.70670   2
   9  -5  -2 26.0041 4.51314  28
  -5   9   2 40.2348 5.69570  27
  -5   2  -9 21.5986 4.93188  27
   9   5   2 33.6677 4.11101  29
   9  -5  -2 39.2032 4.74882  29
  -9   5  -2 28.8218 5.97929  27
  -9  -2  -5 23.7953 5.19944  27
  -9  -5   2 29.9895 4.39492  14
   2   5  -9 37.1662 4.80003  15
  -5  -2   9 39.3328 4.76465  13
  -2   5   9 25.9817 5.27650  13
  -5   9   2 22.8417 4.61638   7
  -5   9   2 37.9745 5.94701   6
   2   9   5 29.1438 4.99660   6
   9   5   2 35.6929 5.19631   7
   2   9   5 43.7594 6.21160   7
  -2   9  -5 47.7108 6.94882   6
  -2  -5  -9 18.0344 5.46181  25
  -5   2  -9 23.2271 6.02251  25
  -2   9  -5 59.9101 8.65305  27
   9  -2   5 32.1136 3.73073  26
   5   9  -2 41.0257 4.88743  24
   9   2  -5 22.9886 4.89203  24
  -9  -2  -5 34.1930 7.38762  23
  -5  -9  -2 22.9572 5.39027  23
   5  -2  -9 33.5577 5.34512  22
   5  -9   2 33.7370 4.71057  20
  -2  -9   5 36.4878 4.16867  20
   2  -9  -5 29.2182 6.19094  21
  -5  -2   9 36.2889 4.33282  20
   2  -5   9 33.3325 4.21338  20
  -5   2  -9 33.7196 4.19088  19
   5  -9   2 42.3290 4.57154  16
  -2   9  -5 33.5932 4.79935  18
  -9  -2  -5 28.8082 3.58069  19
  -9   5  -2 33.1596 4.48308  18
  -5   2  -9 37.3903 4.23021  15
  -2  -5  -9 24.2887 4.18512  15
   2  -9  -5 32.1943 5.41126  15
   5  -2  -9 31.4789 4.68252  15
  -2  -9   5 27.7085 4.39158  16
   9   2  -5 31.8108 4.83036   7
  -2   5   9 32.4895 5.19615   8
   9   5   2 41.9973 5.88450   8
   2   9   5 27.6287 5.16343   8
   5   2   9 38.3318 5.79391   8
  -9  -2  -5 29.7532 4.17493   9
  -5  -9  -2 29.3499 5.06909  12
   2  -9  -5 26.8997 4.62023  12
  -5   9   2 29.2222 4.82374  11
  -5   2  -9 34.2211 4.39857   9
   5   9  -2 31.7048 5.38817   8
  -4  -9   5 12.3920 3.28591   5
  -9  -5   4 15.7426 4.10579   5
  -9  -4  -5 18.7999 3.93260   5
  -9   4   5 11.7997 3.50941   6
  -9   4   5 15.4481 3.96257   2
  -5  -9  -4 13.3863 4.42582   4
   9   4  -5 16.3070 4.15050   1
  -4  -9   5 19.9727 4.23374   4
   9   5   4 21.1527 2.95862  29
   9  -5  -4 14.1391 3.73104  28
  -5   4  -9 15.9512 5.12122  27
   9  -5  -4 21.3149 3.76798  29
  -9   5  -4 14.3097 5.77629  27
  -9  -5   4 20.3474 3.41051  14
   4   5  -9 19.1446 3.79598  15
  -5   9   4 12.5709 3.80825  13
  -9   4   5 20.5619 4.03237  13
  -5   4  -9 19.4358 3.52066  15
  -5   9   4 19.5479 4.27355   7
  -4   9  -5 14.6338 4.63309   6
  -5   9   4 25.3398 5.08205   6
   4   9   5 9.26064 4.60712   7
   5   9  -4 17.7980 3.88684  24
   9   4  -5 11.6964 4.25956  24
  -4   9  -5 20.6747 6.76272  27
  -5   4  -9 18.7299 6.09377  25
   9  -4   5 16.1303 2.61044  26
   5  -4  -9 20.4212 4.56765  22
  -9  -4  -5 16.4242 5.93574  23
  -5  -9  -4 18.4848 4.94054  23
  -5  -9  -4 26.5655 5.73213  21
  -4  -5  -9 20.1106 6.04572  21
   4  -9  -5 14.4401 5.37542  21
   4  -5   9 20.1982 3.33688  20
  -5  -4   9 22.7323 3.25232  20
   5  -9   4 20.8526 3.51593  20
  -4  -9   5 19.8354 2.83002  20
  -5   4  -9 23.4722 3.34261  19
  -4  -5  -9 13.2225 2.93092  19
  -4   9  -5 14.4398 3.39553  18
   5  -4  -9 25.1731 4.08333  15
   4  -9  -5 22.7700 4.73399  15
  -4  -5  -9 16.8489 2.97046  15
   5  -9   4 22.4876 3.56488  16
  -5  -4   9 14.0178 2.70456  16
  -4  -9   5 26.0197 3.89158  16
   9   4  -5 15.2465 3.85477   7
   5   9  -4 13.9725 3.92097   7
  -4   5   9 17.7584 4.00422   8
   9   5   4 22.6760 5.19974   8
   4   9   5 20.3828 5.01442   8
   5   4   9 15.3282 5.12846   8
  -9   5  -4 17.9005 3.23079  10
  -9  -4  -5 18.4156 3.23592   9
  -5   4  -9 13.9364 2.99877   9
  -9   4   5 16.8294 3.15102  11
  -5  -6   9 24.2429 4.82068   5
  -6  -9   5 19.2424 4.49625   4
  -6   5   9 26.5497 4.25017   6
  -6  -9   5 33.4063 4.62034   5
  -9  -6  -5 26.5177 4.47412   5
  -9   6   5 25.3307 4.77353   6
   6  -9  -5 21.4743 6.08379   3
   6   5  -9 24.3510 5.20794   1
  -5  -9  -6 25.9225 5.86696   4
   5  -6  -9 21.1049 5.38385   3
  -5   6  -9 20.0538 6.13213  27
   9  -5  -6 23.3741 4.33250  28
  -9   5  -6 20.5228 6.25157  27
  -5   9   6 17.1019 4.91021  13
  -9   6   5 40.9102 5.26417  13
   6   5  -9 17.8980 4.40508  15
  -6   5   9 28.0419 5.25670  13
  -5   6  -9 30.6609 4.52761  15
  -9  -5   6 23.9291 3.80168  14
   5   9  -6 24.4568 4.62927  15
   6   9   5 30.8305 5.85577   7
  -6   9  -5 32.3461 5.47785   6
   5   6   9 28.7318 5.17958   7
  -5   9   6 26.5397 5.36039   6
   9  -6   5 22.0223 3.29235  26
   5   9  -6 18.3632 5.00865  24
   6  -5   9 24.2762 2.99164  26
  -5   6  -9 33.9701 7.30505  25
   9   6  -5 29.7374 5.62410  24
  -9  -6  -5 26.1546 4.43854  21
  -9  -6  -5 14.1112 6.45559  23
   5  -9   6 26.1000 4.09623  20
  -5  -6   9 24.1022 3.63764  20
  -6  -5  -9 28.1706 6.15675  21
  -5  -9  -6 19.7932 5.96540  21
   6  -9  -5 20.4990 5.67156  21
   6  -5   9 25.6715 3.75366  20
  -5   6  -9 25.5409 3.97657  19
  -6   9  -5 23.6829 4.62891  18
  -6  -5  -9 26.7677 3.80879  19
   5  -6  -9 31.3311 5.23975  15
   5  -9   6 22.5342 4.05006  16
  -5  -6   9 23.3080 3.57807  16
   6  -9  -5 15.2021 4.74839  15
   5   9  -6 22.0355 4.60729   7
   9   6  -5 29.2721 4.94815   7
   9   5   6 20.3547 5.80780   8
   6   9   5 23.0566 6.47840   8
  -6   5   9 27.1056 4.76268   8
   5   6   9 35.9060 6.43760   8
  -9  -6  -5 27.1079 3.68743   9
  -9   5  -6 23.3332 3.95923  10
  -6  -5  -9 22.2750 4.28225   9
  -6   5   9 25.8732 4.19986  11
  -9   6   5 26.3227 4.14862  11
  -9  -6  -3 7.47821 2.92204   4
  -9  -6  -3 3.40956 3.01337   5
  -9  -3   6 9.47488 3.84057   5
  -6  -9   3 7.06456 3.08048   5
  -6   3   9 4.41725 2.47257   6
  -9   6   3 4.20284 3.30646   6
  -3  -6   9 6.60631 3.12615   5
  -9  -3   6 7.51757 2.91161   2
   6   3  -9 5.63447 3.60689   1
  -6   3   9 7.77881 3.15112   2
   6  -9  -3-0.52911 4.72426   3
  -6  -9   3 9.51907 3.68509   4
   3  -6  -9 6.66079 3.97446   3
   9  -6   3 4.94165 3.18757  28
  -9   6   3 15.9048 3.61226  27
   9  -3  -6 7.43522 2.96274  28
  -9   3  -6 10.8571 4.73923  27
  -6   9  -3 6.32560 5.56144  27
  -6   3   9 9.91525 3.62878  13
  -3   6  -9 9.80409 3.43728  15
   3   9  -6 6.56560 3.44651  15
  -3   9   6 2.45755 3.41868  13
  -9  -3   6 11.3290 2.86888  14
   3   6   9 15.7516 4.59640   7
  -3   9   6 6.68280 4.17846   7
  -3   9   6 12.9589 4.02787   6
   6   9   3 5.61506 3.95151   7
  -6   9  -3 7.43933 4.37638   6
  -3   6  -9-3.05660 4.95226  27
  -3   6  -9 4.28162 5.28114  25
   6  -3   9 9.45499 1.68626  26
  -9  -6  -3 12.5523 5.82806  23
   6   3  -9 7.28353 3.60540  22
   9   6  -3 8.43502 3.87721  24
   9  -3  -6 1.70923 3.12988  22
   3  -9   6 6.54184 2.70449  20
   9  -6   3 4.19240 2.36251  20
  -3  -9  -6-0.66126 4.91156  21
  -3  -6   9 8.42747 2.35640  20
   6  -3   9 12.4409 2.38338  20
  -3   6  -9 5.40583 2.29679  19
  -6   9  -3 4.88671 2.96817  18
   6  -3   9 4.82096 3.66935  17
  -6  -3  -9 9.19261 2.52165  19
   3  -6  -9 11.2895 3.60843  15
  -3  -6   9 7.91988 2.45813  16
  -3  -9  -6 8.47308 3.27029  15
   6  -9  -3 12.1633 3.92861  15
   6   3  -9 10.8078 3.21797  15
   3  -9   6 5.91797 2.71764  16
  -3   9   6 8.26686 3.18219   8
   3   9  -6 10.8068 3.32972   7
   9   6  -3 3.70290 3.27910   7
   6   9   3 8.08242 4.44329   8
   9   3   6 9.11033 4.69025   8
  -6  -3  -9 12.4475 3.14394   9
  -6   9  -3 4.52512 2.20412  11
  -9   6   3 7.23555 2.69369  11
  -9  -6  -1 35.2392 5.38891   5
  -6   1   9 32.3132 5.64195   5
  -9  -1   6 37.7355 5.68702   5
  -6  -9   1 36.0122 5.18511   5
   6   1  -9 39.6515 5.69478   1
  -6   1   9 28.5924 4.94652   2
   6  -9  -1 41.5476 6.64372   3
   1  -6  -9 45.6527 5.90298   3
  -9  -1   6 44.3614 5.52537   2
   9  -6   1 41.4367 5.57471  28
  -6   9  -1 49.0987 7.32589  27
  -9   1  -6 35.0009 6.42908  27
   9  -1  -6 40.9008 5.20917  28
   9  -6   1 41.5017 5.88404  30
  -9   6   1 35.7811 6.02808  27
  -6   1   9 49.2688 5.77277  13
   1   9  -6 40.2418 5.75323  15
  -9  -1   6 48.6253 5.39378  14
  -9   6   1 31.7341 4.69819  14
  -6  -9   1 56.3295 6.37587  12
  -1   9   6 37.3391 6.36957  13
  -6   9  -1 56.5098 6.92688   6
   1   6   9 38.0315 6.03787   7
  -9   6   1 48.5748 5.70692   6
  -1   9   6 44.6081 6.33803   6
   6   9   1 40.6968 6.30042   7
  -1   9   6 42.5199 6.61092   7
  -1   6  -9 48.2470 7.32387  25
  -6  -1  -9 34.8852 6.67619  25
  -1   6  -9 39.9901 7.75446  27
   9  -1  -6 34.6195 5.49882  24
   9   6  -1 51.5325 6.02373  24
   9  -1  -6 32.5245 5.50558  22
   6   1  -9 27.8834 5.72736  22
  -9  -6  -1 31.0329 6.62782  23
  -1  -9  -6 39.6573 7.55831  21
  -1  -6   9 50.7353 5.10448  20
   9  -6   1 39.2961 5.16701  20
   1  -9   6 43.0720 5.18818  20
   6  -1   9 40.5717 6.01631  17
  -1  -6   9 36.5587 4.95048  16
  -1   6  -9 45.6606 4.90418  19
  -9   1  -6 42.9689 4.70777  19
  -6  -1  -9 43.9760 4.98649  19
  -6   9  -1 38.5141 5.79476  18
   1  -9   6 44.7940 5.32838  16
   1  -6  -9 39.3645 5.56518  15
  -1   6  -9 49.9908 5.78809  15
  -1  -9  -6 32.0571 5.63820  15
   6   1  -9 46.3856 5.67694  15
  -1   9   6 42.5198 5.79150   8
   1   6   9 43.9813 6.40272   8
   6   9   1 43.1864 6.35947   8
   1   9  -6 35.6117 5.35772   7
   9   6  -1 32.6241 5.65871   7
   9   1   6 32.0770 6.48016   8
  -6  -1  -9 51.6610 5.62815   9
  -9   1  -6 40.7522 4.97079   9
   9   6  -1 33.2020 6.07242   8
  -6   9  -1 39.4968 5.25324  11
  -6  -1   9 50.9568 6.60358   5
  -1  -9   6 40.3284 5.17769   5
  -9   1   6 36.1572 5.36208   5
  -9  -6   1 33.6952 5.51182   5
  -9  -1  -6 51.8593 6.32102   5
   9   1  -6 42.2571 6.38773   1
  -6  -1   9 40.5848 5.38641   2
  -1  -9   6 41.0415 5.78173   4
  -6  -9  -1 39.3400 6.28402   4
  -9   1   6 28.8682 5.35507   2
   9  -6  -1 27.1616 5.73495   3
  -9  -1  -6 43.8398 6.62239  27
   9  -6  -1 47.3122 5.88545  28
  -6   9   1 50.8746 6.88799  27
   9  -6  -1 64.4430 5.86953  29
  -9   6  -1 36.0620 6.97046  27
   6  -1  -9 40.3130 4.95500  28
  -6  -1   9 47.9759 5.73914  13
   1   6  -9 43.3756 5.63261  15
  -1   6   9 41.6792 6.86580  13
  -6   9   1 51.1311 6.74976   6
   9   6   1 33.7655 5.71867   7
  -9   6  -1 54.2961 5.58790   6
  -1   9  -6 52.0852 7.74868   6
   6   9  -1 40.4553 6.13892   7
   1   9   6 33.5393 6.61939   7
   9   1  -6 50.1147 6.30259  24
  -6   1  -9 35.0844 7.12956  25
   9  -1   6 45.8448 4.74656  26
  -1   9  -6 41.7568 9.02334  27
   6   9  -1 57.4002 5.82805  24
  -9  -6   1 44.7962 7.38480  23
   9   1  -6 50.2086 5.92407  22
  -6  -9  -1 42.4420 6.55289  21
  -6  -9  -1 31.7398 6.49271  23
   6  -1  -9 53.4844 6.31131  22
   1  -9  -6 39.8754 7.27334  21
   1  -6   9 39.3078 5.04981  20
  -1  -9   6 42.2882 5.06631  20
   6  -9   1 38.2914 5.61526  20
  -1  -9   6 44.6670 5.40560  16
  -6   1  -9 50.4051 5.23066  19
  -9   6  -1 36.2452 5.49391  18
  -9  -1  -6 49.5380 4.79266  19
  -1  -6  -9 31.6512 5.39728  15
   1  -6   9 31.5704 4.99215  16
   1  -9  -6 43.4045 6.12186  15
   6  -1  -9 42.4262 5.62241  15
  -1   6   9 48.1800 6.29735   8
   9   6   1 25.6499 6.05569   8
   1   9   6 39.5238 6.21764   8
   6   1   9 28.1271 5.94481   8
  -1   9  -6 52.1956 5.50319   7
  -6  -9  -1 38.1578 5.95159  12
  -6   1  -9 48.9438 5.49525   9
  -6   9   1 49.9083 5.96508  11
   6   9  -1 28.4145 6.00722   8
  -9  -1  -6 38.9977 5.06565   9
  -9  -3  -6 7.36500 3.42238   5
  -3  -9   6 7.13934 2.71300   5
  -6  -3   9 18.9954 4.22961   5
  -9   3   6 5.55957 3.01353   6
  -9  -6   3 5.54710 3.52794   5
  -6  -3   9 10.6953 2.97165   2
  -3  -9   6 10.7006 3.47285   4
  -6  -9  -3 9.40989 4.13864   4
  -9   3   6 6.74806 3.19004   2
   3  -9  -6 10.7118 4.65194   3
   9   3  -6 5.83018 3.96304   1
   9  -6  -3 10.8014 4.02536   3
   6  -3  -9 7.99294 2.76254  28
   9  -6  -3 8.11836 3.56609  28
  -6   3  -9 6.97332 4.19834  27
  -9   6  -3 4.06051 4.74428  27
   9  -6  -3 6.94906 2.88222  29
  -9  -6   3 10.4337 2.98705  14
   3   6  -9 8.40649 3.16192  15
  -9   3   6 10.3823 3.50511  13
  -6  -3   9 5.46341 2.75392  13
  -3   9  -6 16.0751 5.44904   6
  -9   6  -3 9.54003 2.70540   6
  -6   9   3 18.0256 4.60543   6
   9   6   3 14.1243 4.26827   7
   3   9   6 7.38910 4.21604   7
   9   3  -6 6.36791 3.77305  24
  -6   3  -9 4.12464 4.56327  25
  -3   9  -6 16.4680 6.85395  27
   6   9  -3 3.64422 3.20064  24
   9  -3   6 8.40559 2.00687  26
  -6  -9  -3 3.77361 4.23332  23
  -6  -9  -3 6.87376 4.17824  21
   6  -3  -9 12.3588 4.21542  22
  -6  -3   9 6.98644 2.61484  20
   6  -9   3 6.99113 2.76196  20
   3  -9  -6 19.7365 5.85085  21
  -3  -6  -9 14.8662 5.69512  21
   3  -6   9 10.6820 2.61736  20
  -3  -9   6 10.9365 2.43076  20
   3  -6   9 8.05204 2.84088  16
  -3  -6  -9 1.30778 2.21230  19
  -9   6  -3 5.09634 2.85672  18
  -9  -3  -6 10.5799 2.13152  19
  -3  -6  -9 8.58945 2.74784  15
   6  -9   3 8.29340 2.70370  16
   3  -9  -6 3.35806 3.58987  15
   6  -3  -9 15.7320 3.62133  15
  -3  -9   6 19.0172 3.32163  16
  -3   6   9 9.04018 3.50037   8
   9   6   3 16.9411 4.64540   8
   6   9  -3 9.08996 3.94915   7
   9   3  -6 5.21654 3.38082   7
   3   9   6 10.1263 4.22027   8
   6   3   9 12.3549 4.80856   8
  -9  -3  -6 11.4841 2.73160   9
   6   9  -3 12.6664 4.07177   8
  -6   9   3 11.8051 3.68571  11
  -6   3  -9 10.3488 2.70481   9
  -9   3   6 6.67886 2.49000  11
  -9  -6   5 29.9081 5.42710   5
  -5  -9   6 25.5871 4.42175   4
  -5  -9   6 29.5837 4.44442   5
  -5   6   9 21.9193 4.17262   6
  -9   5   6 26.2511 4.52148   6
  -9  -5  -6 35.4527 4.85324   5
   5  -9  -6 26.8136 6.22258   3
  -9   5   6 32.2837 5.14365   2
  -6  -9  -5 19.7063 5.25412   4
  -6  -5   9 16.1608 3.72208   2
   9   5  -6 32.9465 5.27710   1
   9  -6  -5 19.5628 5.08792   3
   6  -5  -9 27.5687 5.07607   3
   9  -6  -5 29.1351 4.74395  28
  -9   6  -5 32.5827 6.32695  27
  -6   5  -9 16.7897 5.93964  27
   5   6  -9 18.9449 4.14004  15
  -9   5   6 32.4940 5.12024  13
  -5   6   9 17.3870 5.13166  13
  -6   9   5 26.0963 4.66253  13
  -6   5  -9 24.0458 4.28594  15
  -9  -6   5 23.4623 3.97108  14
  -6   9   5 34.9931 5.99010   6
   5   9   6 27.9842 5.77772   7
  -5   9  -6 36.4375 8.58371  27
   6   9  -5 24.8919 5.16003  24
  -6   5  -9 16.9335 6.18251  25
   9  -5   6 26.3714 3.28620  26
  -9  -5  -6 32.1819 7.40103  23
  -6  -9  -5 29.0095 6.17329  21
   6  -5  -9 18.2968 5.10792  22
  -6  -9  -5 21.0175 5.84390  23
   5  -6   9 20.7670 3.61751  20
  -6  -5   9 13.9944 3.39532  20
  -5  -6  -9 26.1597 6.27524  21
   5  -9  -6 24.4047 6.18998  21
   6  -9   5 29.7906 4.22567  20
  -6   5  -9 23.7937 3.85693  19
   5  -6   9 20.3636 3.96300  16
  -5  -6  -9 17.8448 3.62529  19
   6  -5  -9 25.6761 4.59284  15
   5  -9  -6 27.6494 5.22522  15
   6  -9   5 28.7470 4.15529  16
  -5  -9   6 23.7286 4.27324  16
   9   5  -6 26.0494 4.87085   7
   9   6   5 13.2389 5.53513   8
  -5   6   9 35.0698 5.02445   8
   5   9   6 24.2824 5.53215   8
   5   6  -9 25.5101 4.77653   7
   6   5   9 20.8353 5.71536   8
  -9  -5  -6 22.1280 3.69514   9
  -9   6  -5 31.2758 4.06555  10
  -6   9   5 32.1544 5.29265  11
  -9   5   6 27.3401 4.10779  11
  -6   5  -9 24.8864 3.79325   9
  -6  -7   9 14.9569 4.23304   5
  -7   6   9 7.73953 3.44785   6
  -9  -6   7 22.5461 5.13612   5
  -7  -9   6 20.7699 4.24930   5
  -9   7   6 10.6706 4.13631   6
  -7  -9   6 7.32049 3.92794   4
  -9  -7  -6 15.7890 3.98450   5
   6  -7  -9 17.8672 5.28719   3
   7  -9  -6 16.0901 5.89046   3
   9  -6  -7 12.0061 4.92504   3
  -9   6  -7 20.8467 6.06355  27
  -6   7  -9 10.1095 6.73076  27
  -7   9  -6 5.45197 9.41188  27
   9  -6  -7 17.8079 4.34057  28
  -9   7   6 21.4387 4.75354  13
  -7   6   9 16.2560 4.62161  13
   7   6  -9 5.64020 3.75664  15
   6   9  -7 17.8765 4.00139  15
  -6   9   7 17.4962 4.94110  13
  -9  -6   7 14.8485 3.33960  14
  -6   9   7 9.07557 4.65255   6
   6   7   9 7.84796 4.74690   7
   7   9   6 19.4975 5.19944   7
   9   7  -6 11.8020 5.06624  24
   9  -7   6 13.3696 2.51657  26
  -6   7  -9 3.64288 5.80774  25
   7  -6   9 16.9863 2.27686  26
  -9  -7  -6 12.9755 6.22663  23
  -6  -9  -7 4.87365 6.10221  23
   7  -6   9 16.7712 3.21995  20
   6  -9   7 16.3930 3.43233  20
  -6  -9  -7 12.9581 6.01359  21
  -6  -7   9 11.8097 2.75598  20
   7  -6   9 10.8776 3.15458  16
  -7   9  -6 7.29135 5.06253  18
  -6  -9  -7 4.93483 2.63226  19
  -7  -6  -9 13.4583 3.07801  19
   6  -7  -9 16.4150 4.27319  15
   9  -6  -7 11.0381 3.97181  15
   6  -9   7 13.6233 3.36914  16
   7  -9  -6 12.4557 4.49709  15
   9   7  -6 11.4028 4.30228   7
   7   9   6 16.2681 5.81254   8
   9   6   7 15.3809 5.62948   8
   6   7   9 10.5250 5.48748   8
   7   6  -9 10.8401 4.48688   7
   6   9  -7 10.5859 4.44252   7
  -7   6   9 17.6758 3.89194  11
  -7  -6  -9 15.7773 3.65616   9
  -9   7   6 11.7624 3.60898  11
  -6   9   7 13.8658 4.45497  11
  -4  -7   9 1.28984 2.96310   5
  -9  -4   7 2.77813 3.65724   5
  -9  -7  -4 2.96853 2.77132   5
  -7  -9   4-1.63148 3.49906   5
  -7   4   9-0.32484 2.58622   6
  -7  -9   4 5.96822 3.22159   4
  -9  -7  -4 4.41973 2.91516   4
  -9  -4   7 4.59425 2.75116   2
   4  -7  -9 6.50503 4.65422   3
  -7   4   9 0.74996 3.07953   2
   7  -9  -4 5.08722 5.11115   3
   7   4  -9 3.27293 3.50972   1
   9  -4  -7 3.05387 2.85745  28
  -7   9  -4 0.78525 5.89350  27
  -9   4  -7 4.77732 4.74818  27
  -4   9   7 3.79911 3.92319  13
  -4   7  -9-2.92535 3.00263  15
   4   9  -7-1.62092 3.11745  15
  -9   7   4 5.82759 3.22026  13
  -9  -4   7-0.91449 2.38773  14
  -7   9  -4 0.93803 3.86957   6
   7   9   4-4.31116 4.35461   7
  -4   9   7 9.95439 4.16768   6
   4   7   9-0.50735 4.43141   7
   9   7  -4 7.58182 4.06609  24
  -4   7  -9 0.73970 6.00677  27
  -4   7  -9 2.79800 6.13539  25
   7  -4   9-0.89479 1.58384  26
  -9  -7  -4 0.90850 3.34876  21
   9  -4  -7 5.56666 3.64208  22
  -9  -7  -4 2.85808 5.64944  23
  -4  -9  -7-5.75971 5.30416  21
   4  -9   7-0.69923 2.41120  20
  -4  -7   9 2.47755 1.94159  20
   9  -7   4-0.66574 2.19456  20
   7  -4   9 4.65622 2.28593  20
   7  -4   9 3.22921 3.50650  17
  -4   7  -9 0.61229 2.24557  19
  -7   9  -4 2.37817 3.34746  18
  -7  -4  -9 2.49848 2.10793  19
   4  -7  -9 4.11547 3.63727  15
   7   4  -9 8.46339 3.24461  15
  -4  -9  -7 0.38424 3.02419  15
   4  -9   7 3.10716 2.59489  16
   7  -9  -4-2.50938 3.45754  15
  -4  -7   9-0.30708 2.40529  16
   9   7  -4 4.16378 3.59914   7
   9   4   7 7.87817 4.94753   8
   7   9   4-0.60904 4.07123   8
   4   9  -7 5.35038 3.30973   7
  -7  -4  -9 2.77910 2.63610   9
  -9   7   4 9.31672 3.30909  11
  -9  -7  -2 0.37953 2.84720   5
  -7   2   9 4.55598 2.66366   5
  -7  -9   2 4.45532 2.86966   5
  -9  -2   7 9.51982 3.70287   5
  -9  -7  -2 2.27590 2.91418   4
  -2  -7   9 5.59807 3.12343   5
  -9  -2   7 3.08500 2.89909   2
  -7  -9   2-1.72494 3.45966   4
  -7   2   9 6.95509 3.08372   2
   7   2  -9 6.13607 3.59432   1
   2  -7  -9 10.2763 3.85064   3
   7  -9  -2 5.25183 5.06532   3
   9  -2  -7 3.68688 2.79433  28
  -9   7   2-2.11985 3.81233  27
  -7   9  -2 3.33614 5.70011  27
  -9   2  -7 3.21697 4.62701  27
   9  -7   2 3.88890 3.29595  30
  -7  -9   2 5.00123 3.42534  12
  -9   7   2 4.94138 2.42837  14
  -2   7  -9 3.94548 3.18464  15
  -2   9   7 1.56033 3.76963  13
  -7   2   9 0.42388 3.32781  13
  -9  -2   7 3.63711 2.51799  14
   2   9  -7 4.46532 3.57301  15
  -2   9   7 3.61056 4.30610   7
  -2   9   7 11.4402 3.87901   6
   7   9   2 0.51453 3.52916   7
  -7   9  -2 3.47094 4.09951   6
  -9   7   2 8.33401 3.61794   6
   2   7   9 0.49584 3.88813   7
  -2   7  -9 8.46765 5.94450  25
   9  -2  -7 2.30664 3.05442  24
  -2   7  -9 12.6602 6.87789  27
   7   2  -9 0.42509 3.78977  22
   9   7  -2 10.6702 3.93219  24
  -9  -7  -2-1.29728 4.69541  23
   9  -2  -7 10.4324 3.67881  22
   9  -7   2 4.26918 2.63838  20
  -2  -9  -7 8.43128 5.40741  21
  -2  -7   9 1.69383 2.03607  20
  -9   2  -7 3.24606 2.30676  19
  -2   7  -9 0.54366 2.13562  19
   7  -2   9 1.34923 3.50940  17
  -7  -2  -9 2.96882 2.15290  19
   2  -7  -9 7.75505 3.72270  15
   7   2  -9-0.35047 2.97756  15
   2  -9   7 3.09615 2.73679  16
  -2  -9  -7 1.26844 3.22575  15
   7  -9  -2 11.1434 4.26047  15
  -2  -7   9 3.39103 2.68477  16
  -2   9   7 6.25122 3.28200   8
   7   9   2 4.94821 4.06077   8
   9   2   7 0.52713 4.08555   8
   9   7  -2 8.14086 3.76012   7
   2   7   9-0.51024 4.25997   8
   2   9  -7 2.47606 2.99062   7
  -9   2  -7 3.74898 2.26324   9
   9   7  -2 2.69423 3.98034   8
  -7  -2  -9 6.19878 2.85200   9
  -7   9  -2 1.00861 2.44831  11
  -7   0   9 5.07377 3.43969   5
  -9   0   7 4.79586 3.04109   5
  -9  -7   0 3.83169 3.27570   4
  -7  -9   0 3.57294 2.63736   5
  -9  -7   0 1.18401 3.07413   5
   0  -9   7 6.38990 2.81528   5
  -7  -9   0 0.44503 3.49967   4
   7  -9   0 7.21421 4.61152   3
  -7   0   9 12.3947 3.23976   2
  -9   0   7 1.00979 2.82896   2
   7   0  -9 2.25679 3.53294   1
   9  -7   0 0.41921 3.93302   3
  -9   0  -7 2.50399 4.61777  27
   7   0  -9 3.85811 2.41982  28
   7  -9   0 4.76405 3.51852  30
   9  -7   0 3.30939 2.67202  29
  -9   7   0 2.10368 4.70877  27
  -7   9   0 5.00031 4.99395  27
   9  -7   0 3.62287 3.58167  28
  -7   0   9 0.38054 3.09701  13
   0   9  -7 7.52966 3.97033  15
   9   7   0 6.25792 3.64895   7
   0   7   9 6.34315 4.17990   7
  -7   9   0 4.65334 4.44783   6
  -9   7   0 9.85457 3.46144   6
   7   9   0 2.93986 4.11797   7
   0   7  -9 0.78099 6.64162  27
   9   0  -7 4.34641 3.53093  24
   7   0  -9-0.41659 3.81617  22
   7   9   0 7.94157 3.00057  24
   9   0  -7 4.05845 3.30058  22
  -9  -7   0 8.85429 5.35758  23
   9   7   0 7.66130 3.54734  24
  -7  -9   0 4.09940 4.64453  23
   0  -9   7 8.02702 2.50963  20
   0  -7  -9 4.69563 5.89435  21
   7  -9   0 4.65659 3.19925  20
   9  -7   0 8.32649 3.15729  20
   0  -7   9 5.35014 2.41838  20
   0  -9  -7 10.5002 5.48498  21
  -9   0  -7 5.23063 2.02695  19
   9   0   7 6.56457 3.43785  17
   7   0   9 1.38959 3.60017  17
   0   7  -9 3.18157 2.26338  19
  -9   7   0 4.59312 3.11544  18
  -7   0  -9 4.14467 2.18644  19
   0  -7  -9 3.20305 3.43691  15
   7   0  -9 2.08395 2.95975  15
   0  -7   9 5.38834 2.71829  16
   0  -9  -7-1.82179 3.35477  15
   0   7   9 3.64705 4.03348   8
   7   9   0 6.30232 4.14593   8
   0   9  -7 8.27669 3.12397   7
   0   7  -9 2.75366 2.39111   7
   0   9   7 4.98556 3.44649   8
  -7   0  -9 3.28801 2.75121   9
   9   7   0 2.20898 4.16108   8
  -7  -9   0 1.83487 3.29192  12
  -7   9   0 8.56166 3.27905  11
  -7  -2   9 3.12760 3.41028   5
  -9   2   7 3.13413 2.25412   5
  -9  -7   2 4.46600 3.42102   5
  -2  -9   7 1.67605 2.57334   5
  -9   2   7 3.18812 3.29134   2
   9  -7  -2 4.50936 4.26752   3
  -7  -9  -2 3.25267 4.04591   4
  -7  -2   9 4.68824 2.61505   2
  -9   7  -2-3.59675 4.79652  27
   7  -2  -9-1.03069 2.53000  28
  -7   9   2 3.95945 4.77334  27
  -7   2  -9-1.43765 4.28396  27
  -9  -2  -7-4.28292 4.10546  27
   9  -7  -2-0.40692 3.74787  28
   2   7  -9 3.75733 3.12357  15
  -2   7   9 7.67519 4.12111  13
  -7  -2   9 5.34768 2.89038  13
  -9   7  -2 0.33421 2.86238   6
   7   9  -2 9.00715 3.99441   7
   9   7   2 7.51006 3.85835   7
  -7   9   2 16.6224 5.16820   6
  -2   9  -7 5.41215 5.41145   6
   2   9   7 3.80064 4.46061   7
  -2   9  -7 11.9383 5.25117  25
  -7   2  -9 0.61567 5.47616  25
  -2   9  -7 11.2475 7.53346  27
   9   2  -7 1.48351 3.53373  24
   9  -2   7 3.96239 1.78062  26
   7   9  -2 3.25811 3.24662  24
   9   2  -7-0.76898 3.30514  22
  -7  -9  -2-2.19603 4.48722  21
  -7  -9  -2 1.75014 4.56706  23
   7  -2  -9 5.52464 3.92918  22
   7  -9   2 3.57902 2.76850  20
  -2  -7  -9 11.4582 5.47753  21
   2  -9  -7 0.69635 5.68800  21
   2  -7   9 6.89983 2.45104  20
  -2  -9   7 0.56334 2.19178  20
  -9  -2  -7 5.02707 2.09589  19
  -7   2  -9 2.40784 2.21723  19
   9  -2   7 1.17651 3.24306  17
  -9   7  -2 10.2091 3.25805  18
  -2  -7  -9 3.97495 2.91403  15
  -2  -9   7 7.31517 2.56762  16
   2  -7   9-2.59619 2.75396  16
   7  -2  -9 2.53345 3.03926  15
   9   7   2 2.84926 4.23067   8
  -2   7   9 5.02877 3.65052   8
   7   2   9 0.49810 4.09339   8
   2   9   7-5.49781 4.21043   8
   2   7  -9 1.33240 2.87952   7
  -9  -2  -7 2.99056 2.18285   9
  -7   9   2 3.97012 3.29930  11
  -9  -7   2 5.52657 2.54044  12
  -7   2  -9 3.43778 2.49627   9
   7   9  -2-1.00784 4.18295   8
  -4  -9   7 4.08255 2.73633   5
  -7  -4   9 2.67085 3.70520   5
  -9  -4  -7 0.44859 3.62500   5
  -4  -9   7 2.26543 2.81857   4
  -9  -7   4-0.49379 3.59243   5
  -9   4   7 5.06649 3.04589   6
  -7  -4   9 2.89648 2.44744   2
  -9   4   7 1.97325 3.08755   2
  -7  -9  -4-0.97004 3.93954   4
   9  -7  -4-0.47894 3.97031   3
   4  -9  -7 3.85124 4.84740   3
  -9   7  -4 4.71033 5.63220  27
  -7   4  -9 1.09389 4.39550  27
   9  -7  -4 0.41677 3.62401  28
   7  -4  -9-1.22421 2.78091  28
  -4   7   9 0.56323 4.25345  13
  -9  -7   4-0.30556 2.50972  14
  -9   4   7 3.31382 3.72334  13
   4   7  -9 3.87098 3.20994  15
  -7  -4   9 1.95854 2.14133  14
  -7   9   4-5.49959 4.39616   6
   9   7   4 1.97006 3.67493   7
   4   9   7 5.05358 4.51245   7
  -7   4  -9 3.25150 4.99828  25
  -4   9  -7 3.72798 6.90786  27
   7   9  -4-0.97252 3.49156  24
   9   4  -7 1.12760 3.79723  24
   9  -4   7-0.82053 1.75484  26
  -7  -9  -4 3.64347 4.35914  21
  -9  -4  -7 9.16758 6.44197  23
   7  -4  -9 0.45879 3.70728  22
  -7  -9  -4-1.23254 4.54018  23
   4  -7   9 2.96018 2.44100  20
   4  -9  -7-2.74009 5.56248  21
  -4  -7  -9 11.6151 5.46070  21
  -4  -9   7 4.38141 2.01885  20
   7  -9   4 1.90974 2.57429  20
  -7   4  -9 0.64255 2.35460  19
  -9   7  -4 0.88284 2.74005  18
  -4  -7  -9-0.35865 2.43590  19
  -9  -4  -7 3.70690 1.93616  19
  -4  -7  -9 2.48140 2.59883  15
   7  -4  -9 3.94136 3.45843  15
   4  -7   9-0.99084 2.52636  16
  -4  -9   7 4.86422 2.59418  16
   4  -9  -7 1.55474 3.79449  15
   7   9  -4-1.45692 3.75535   7
   9   7   4-0.62572 4.33947   8
  -4   7   9 1.55935 3.13431   8
   4   9   7 2.29534 4.22785   8
   7   4   9 3.52220 4.93791   8
   9   4  -7-3.87722 3.76283   7
   4   7  -9 2.80627 3.25710   7
  -7   4  -9 4.24201 2.46661   9
  -7   9   4-1.46355 3.08112  11
  -9   4   7 2.22973 2.43676  11
  -9   7  -4-0.31276 2.37863  10
  -9  -4  -7 3.77156 2.57582   9
  -9  -6  -7 24.2436 4.33832   5
  -7  -6   9 14.1426 4.15425   5
  -6  -9   7 16.6029 3.91243   5
  -6   7   9 12.2306 3.90930   6
  -9  -7   6 22.5734 4.80220   5
  -6  -9   7 9.09959 3.50545   4
  -9   6   7 10.6532 3.96338   6
   6  -9  -7 10.6648 5.99579   3
   9  -7  -6 18.3247 5.02595   3
   7  -6  -9 7.22391 4.70166   3
  -9   7  -6 16.3251 6.33888  27
  -6   9  -7 17.3179 7.76801  27
  -7   6  -9 12.4143 6.09639  27
  -9   6   7 10.8444 4.69427  13
   6   7  -9 15.2162 3.94067  15
  -6   7   9 17.9917 4.97031  13
  -7   9   6 10.7165 4.17253  13
   6   9   7 9.29223 4.60008   7
  -7   9   6 18.2552 4.95644   6
   7   9  -6 13.6147 5.24753  24
   9   6  -7 13.3287 5.16625  24
  -7   6  -9 15.3092 6.01263  25
   9  -6   7 11.3356 2.45186  26
  -9  -6  -7 11.1656 6.76841  23
  -6  -7  -9 11.9443 7.13224  23
   7  -6  -9 8.32217 4.69562  22
  -7  -9  -6 8.46927 5.89561  23
  -7  -9  -6 2.03510 4.96236  21
   6  -7   9 12.0138 3.00223  20
  -6  -7  -9 17.3651 6.11140  21
   7  -9   6 15.5617 3.91044  20
  -6  -7  -9 6.15586 2.84425  19
   6  -7   9 13.8376 3.33185  16
   7  -6  -9 12.7479 4.23045  15
   7  -9   6 13.1997 4.14870  16
  -6  -9   7 17.5016 3.71073  16
   6  -9  -7 12.0630 4.54414  15
   6   7  -9 13.8327 4.41840   7
   9   6  -7 16.1423 4.54211   7
   9   7   6 28.4934 5.86537   8
  -6   7   9 24.7788 4.47003   8
   7   6   9 15.8413 5.86901   8
   6   9   7 7.74188 5.51293   8
  -6   7   9 7.64029 3.61034  11
  -6  -7  -9 13.0085 3.55362   9
  -7   9   6 11.5413 4.09149  11
  -9   6   7 8.39358 3.30143  11
  -9  -6  -7 16.1697 3.24212   9
   7  -8  -9 7.57230 5.52727   3
  -7   8  -9-1.85346 6.95577  27
  -9   7  -8 16.2110 6.51411  27
  -8   9  -7 2.94744 8.14256  27
  -9   8   7 3.05740 4.50745  13
  -7   9   8 10.6037 4.65540  13
  -8   7   9-2.50488 4.34554  13
  -7   9   8 3.76706 3.86657   6
   8   9   7 8.45588 4.61802   7
   7   8   9 5.80583 5.16234   7
   9   8  -7 2.07472 4.55235  24
   9  -8   7 4.87995 1.99087  26
  -8  -7  -9-2.78673 7.58258  23
  -7  -9  -8-4.48249 5.36423  21
  -9  -8  -7 9.72071 7.54079  23
  -7  -9  -8-3.28694 6.67373  23
   8  -7   9 3.93253 2.67334  20
   7  -9   8 0.78605 2.69271  20
   9  -8   7 1.85337 2.63163  20
   8   7  -9-0.55834 4.48950   7
   9   7   8-6.53735 5.96105   8
   7   9  -8 7.07326 4.37524   7
   9   8  -7-2.80460 4.41342   7
   7   8   9 0.71389 5.85871   8
   7  -8  -9 3.24467 4.32547  15
   9  -7  -8-0.98563 4.04704  15
   8  -7   9 0.69812 2.52919  16
   7  -9   8 2.22839 2.67241  16
   8  -9  -7 5.02859 4.37181  15
  -9   8   7 1.55605 4.19340   6
  -8  -9   7 5.97071 3.76103   5
  -7  -8   9-0.50875 3.58229   5
  -8   7   9 4.05815 3.79679   6
  -9  -7   8 5.19035 3.97409   5
  -7   9   8-1.65091 3.32535  11
  -8   7   9-0.46458 3.18046  11
  -9   8   7 4.06037 3.59847  11
  -8  -7  -9 4.48377 3.13830   9
  -5  -8   9-0.90166 2.94111   5
  -9  -5   8 5.30297 4.17102   5
  -9   8   5 1.02085 3.75882   6
  -8  -9   5 4.49294 3.22378   4
  -8  -9   5 0.92851 3.10110   5
  -8   5   9-4.92012 3.25873   6
  -9  -5   8 2.29615 2.92324   2
   8   5  -9 1.88502 4.60329   1
  -8   5   9-1.27633 3.62910   2
   5  -8  -9-2.16170 4.90489   3
   8  -9  -5 2.37903 5.44283   3
   9  -5  -8-1.91615 3.57821  28
  -5   8  -9 10.0229 7.16184  27
  -9   5  -8 2.68030 5.46782  27
  -8   9  -5-1.73158 6.69078  27
  -5   9   8-0.60095 3.95195  13
  -9   8   5 2.06700 3.85325  13
   5   9  -8 1.30766 3.30992  15
  -8   5   9-1.64920 3.94446  13
  -9  -5   8-1.28454 2.56587  14
  -5   9   8-1.52605 3.90842   6
   8   9   5-0.57174 3.99146   7
   5   8   9 10.1547 4.76669   7
   9   8  -5 1.81307 4.36520  24
   8  -5   9-1.38577 1.60707  26
   9  -5  -8 4.59906 4.24311  22
  -9  -8  -5 1.66727 3.68366  21
  -9  -8  -5 0.77407 5.59100  23
   5  -9   8 0.74555 2.29052  20
  -5  -9  -8 1.51547 5.13876  21
  -5  -8   9-0.28818 2.04001  20
   9  -8   5-2.57912 2.71327  20
  -5  -9  -8 1.96288 2.45565  19
  -8  -5  -9 0.33830 2.18911  19
   5  -8  -9-2.06120 4.07273  15
   9  -5  -8-4.17151 3.64133  15
   5  -9   8-2.19592 2.71216  16
  -5  -8   9 0.33465 2.41718  16
   8  -9  -5 6.94440 3.62271  15
   9   8  -5 2.59658 4.19371   7
   5   9  -8 0.92816 3.58640   7
   9   5   8-0.66718 5.15595   8
   8   5  -9-1.01350 3.98309   7
  -9   8   5-1.90810 2.93108  11
  -8  -5  -9-0.42051 3.09669   9
  -9  -8  -3 8.49046 3.06354   5
  -8  -9   3 10.2525 3.73628   4
  -9  -3   8 6.81843 3.90124   5
  -8  -9   3 9.01344 3.53267   5
  -9  -8  -3 7.32627 3.49201   4
  -3  -8   9 12.3853 3.50605   5
  -9  -3   8 12.8804 3.71401   2
   8   3  -9 4.40692 4.44858   1
  -8   3   9 6.41420 3.45375   2
   3  -8  -9 6.27990 4.59309   3
   8  -9  -3 8.99160 5.03059   3
   9  -3  -8 9.59648 3.32280  28
  -9   3  -8 9.86518 5.05553  27
  -8   9  -3 0.75039 6.20265  27
   3   9  -8 9.39741 3.69034  15
  -3   8  -9 13.1433 3.94189  15
  -9  -3   8 7.00047 2.78417  14
  -8  -9   3 11.0729 3.72686  12
  -3   9   8 9.60450 4.25691  13
  -8   3   9 8.15828 4.10803  13
  -8   9  -3 16.4018 4.39152   6
  -9   8   3 1.96112 3.92976   6
  -3   9   8 13.1929 4.20249   6
   8   9   3 7.14672 4.26928   7
   3   8   9 8.81623 4.60716   7
  -3   8  -9 12.4383 7.68840  27
   8  -3   9 7.33869 2.01810  26
  -3   8  -9 19.5386 7.03118  25
   8   3  -9 13.5453 4.13110  22
   9  -3  -8 11.8760 4.32964  22
  -9  -8  -3 2.07644 5.52435  23
   9   8  -3 14.4061 4.26833  24
   9  -8   3 7.66669 2.76650  20
   3  -9   8 6.34953 2.74069  20
  -3  -9  -8 7.46993 5.72431  21
  -3  -8   9 9.44578 2.49296  20
  -9   3  -8 5.06727 2.38487  19
  -8   9  -3 13.7814 4.21442  18
   8  -3   9 6.54854 3.81579  17
  -8  -3  -9 9.88380 2.75147  19
   3  -9   8 12.3815 3.40699  16
   8  -9  -3 9.91159 3.97061  15
  -3  -8   9 10.2551 2.98910  16
  -3  -9  -8 16.4654 3.59868  15
   8   3  -9 12.8260 3.76444  15
   3   9  -8 6.32372 3.56504   7
  -3   9   8 8.22390 3.45865   8
   8   9   3 10.5093 4.89292   8
   9   3   8 5.31720 4.83267   8
   9   8  -3 11.0484 4.25187   7
   3   8   9 8.69754 5.00564   8
  -9   3  -8 8.55675 2.68080   9
   9   8  -3 2.86380 4.28751   8
  -9   8   3 11.9684 3.49177  11
  -8  -3  -9 6.63387 3.20453   9
  -8   1   9 12.2899 3.53615   5
  -9  -8  -1 4.28668 3.35499   4
  -9  -1   8 10.3673 3.69118   5
  -8  -9   1 13.1057 3.96096   4
  -8  -9   1 5.30512 2.94751   5
  -1  -8   9 5.54871 2.95141   5
  -9  -8  -1 5.44391 3.03818   5
   8   1  -9 11.4733 4.28733   1
  -8   1   9 2.09803 2.77671   2
   8  -9  -1 9.86481 4.90855   3
  -9  -1   8 4.36416 3.33488   2
   8   1  -9 8.32830 2.70892  28
   9  -1  -8 8.99600 2.89840  28
  -9   1  -8 1.06468 4.36839  27
   9  -8   1 11.7630 4.17478  30
  -8   9  -1 8.93804 5.55927  27
  -9   8   1 7.27262 4.79659  27
  -8   1   9 10.2666 3.75499  13
  -1   8  -9 6.85514 3.60678  15
   1   9  -8 16.4203 4.13168  15
  -1   9   8 3.97281 4.12204  13
   1   8   9 3.78479 4.63455   7
  -9   8   1 9.26670 4.02196   6
   8   9   1-0.52594 3.94949   7
   9   8  -1 8.31352 4.00045   7
  -8   9  -1 6.54806 4.24242   6
  -1   8  -9 8.93653 6.03446  25
  -1   8  -9 7.21793 6.88091  27
   9  -1  -8 5.39159 3.64391  22
   8   1  -9 6.25524 4.17141  22
   8   9   1 9.43709 3.13912  24
  -9  -8  -1 0.66530 4.84766  23
   9   8  -1 11.9125 3.79288  24
   8  -9  -1 1.84838 3.44109  20
   1  -9   8 7.11266 2.66486  20
   1  -8  -9 8.85569 6.05565  21
   9  -8   1 4.57614 3.14835  20
  -1  -8   9 7.48612 2.41201  20
  -9   1  -8 7.93640 2.58744  19
   8  -1   9 5.18735 3.69987  17
  -8   9  -1 7.25825 3.57352  18
  -8  -1  -9 9.40808 2.67563  19
   8   1  -9 7.33102 3.40117  15
  -1  -8   9 10.3702 3.01703  16
  -1  -9  -8 9.23362 3.85918  15
   1  -8  -9 6.44143 3.77003  15
   1   8   9 6.43840 4.35078   8
  -1   9   8 10.5075 3.92997   8
   8   9   1 8.24963 4.54621   8
   1   9  -8 9.49572 3.10565   7
  -9   1  -8 10.9304 2.67394   9
  -8  -9   1 4.65205 3.28741  12
  -9   8   1 5.72208 3.16867  11
  -8   9  -1 9.32852 3.34568  11
  -8  -1   9 8.72714 3.83505   5
  -9   1   8 10.1749 3.09509   5
  -9  -8   1 10.2169 3.44397   4
  -9  -8   1 6.67490 3.25130   5
  -1  -9   8 8.34168 3.02895   5
  -8  -9  -1 7.70966 2.87333   5
   9   1  -8 9.73378 5.13331   1
  -8  -9  -1 6.97254 3.82818   4
  -9   1   8 6.16850 3.32878   2
   9  -8  -1 3.40677 4.58968   3
  -8  -1   9 7.31800 3.10948   2
   8  -9   1 0.46096 3.53873  30
  -9  -1  -8 15.4276 4.97271  27
  -9   8  -1 0.61163 5.05788  27
  -8   9   1 5.76226 4.97148  27
   8  -1  -9 5.08157 2.63180  28
  -8   1  -9 4.48427 4.35789  27
  -9   1   8 9.87275 3.70089  13
   1   8  -9 14.5081 3.98339  15
  -1   8   9 4.10316 4.36449  13
  -1   9  -8 4.04853 3.99667  15
  -8  -1   9 7.92289 3.37697  13
  -1   9  -8 7.58275 5.45651   6
  -8   9   1 21.2726 4.92911   6
  -1   8   9 9.56578 4.86622   7
   8   9  -1 3.05468 3.89664   7
   9   8   1 5.54143 3.74221   7
  -9   8  -1 8.47042 3.81782   6
   1   9   8 18.0107 5.39629   7
   9   1  -8 16.6037 4.57403  24
  -1   9  -8 3.98849 8.28652  27
  -1   9  -8 6.42381 5.28136  25
   9   1  -8 5.92731 4.15612  22
   8   9  -1 8.09708 3.37444  24
  -8  -9  -1 5.72317 4.69763  23
   9   8   1 7.30618 3.47575  24
   8  -1  -9 3.52801 4.08697  22
   9  -8  -1 6.34811 3.14200  20
  -1  -8  -9 10.3097 6.10487  21
   1  -9  -8 11.2950 5.92091  21
   8  -9   1 7.79820 3.35240  20
  -1  -9   8 8.18928 2.59796  20
  -9  -1  -8 11.0092 2.60024  19
  -8   1  -9 10.0612 2.70881  19
   9  -1   8 1.33039 3.44829  17
  -9   8  -1 14.0424 3.79487  18
   8  -1  -9 5.19340 3.28737  15
   1  -9  -8 9.89511 4.00536  15
  -1  -9   8 4.34032 2.82125  16
  -1  -8  -9 8.52108 3.65718  15
  -1   8   9 11.5914 4.26061   8
   1   8  -9 7.82246 3.16892   7
   1   9   8 3.80356 4.16288   8
  -9  -1  -8 5.87878 2.76483   9
   8   9  -1 2.80636 3.86067   8
  -9  -8   1 7.74900 2.97748  12
  -8  -9  -1 5.16943 3.38866  12
  -8   9   1 9.16521 3.17676  11
  -8   1  -9 5.63005 2.69853   9
  -3  -9   8 12.5764 3.35641   5
  -8  -3   9 7.33782 4.13523   5
  -9  -8   3 12.2800 3.90444   5
  -8  -3   9 5.27911 3.01907   2
  -8  -9  -3 3.84681 3.82944   4
  -9   3   8 7.38160 3.52211   2
   3  -9  -8 10.5109 4.80310   3
   9  -8  -3 4.67829 4.55293   3
   9   3  -8 14.1421 5.11140   1
   8  -3  -9 13.8455 3.36965  28
  -9   8  -3 11.9649 6.36252  27
  -8   3  -9 3.32658 4.82446  27
   3   8  -9 7.47262 3.43775  15
  -3   8   9 9.84018 4.55047  13
   9   8   3 3.69045 3.97118   7
  -9   8  -3 9.39311 3.52461   6
   3   9   8 16.6826 5.39377   7
  -3   9  -8 16.7472 6.41417  25
  -3   9  -8 2.98775 7.65310  27
   9   3  -8 6.28722 4.71441  24
   9  -3   8 12.5737 2.38700  26
   8   9  -3 15.5026 4.27294  24
  -8  -9  -3 9.80407 4.58441  21
   9   3  -8 9.38381 4.09072  22
   8  -3  -9 5.44054 4.21551  22
  -8  -9  -3 7.18348 5.28421  23
   3  -8   9 10.1086 2.92188  20
   8  -9   3 9.76070 3.14548  20
  -3  -8  -9 15.4191 6.40588  21
   3  -9  -8 17.1358 6.32009  21
  -3  -9   8 10.2047 2.63461  20
  -8   3  -9 11.9193 2.91946  19
  -3  -8  -9 10.3315 2.95265  19
  -9   8  -3 10.8159 3.53232  18
   9  -3   8 6.13462 3.72528  17
  -9  -3  -8 13.2260 2.70865  19
  -3  -8  -9 7.25171 3.16179  15
   3  -8   9 6.04537 3.06236  16
  -3  -9   8 12.8693 3.10904  16
   8  -3  -9 7.86215 3.40933  15
   3  -9  -8 9.99037 4.30548  15
   8   9  -3 11.3920 4.22078   7
   3   8  -9 10.4852 3.69291   7
  -3   8   9 3.59927 3.46488   8
   9   8   3 3.13896 4.46161   8
   8   3   9 12.6579 5.37356   8
   3   9   8 9.61405 4.66622   8
  -8   3  -9 16.0767 3.33519   9
   8   9  -3 4.97542 4.30458   8
  -9  -3  -8 11.4725 3.33732   9
  -5  -9   8 6.31438 2.92075   5
  -8  -5   9 2.27943 3.71975   5
  -9   5   8 0.79739 3.32213   6
  -9  -8   5 4.61274 3.65505   5
  -5  -9   8 3.56879 2.94120   4
  -8  -5   9 0.36641 2.94596   2
  -9   5   8 3.04290 3.76226   2
   5  -9  -8 2.32393 5.42606   3
   9   5  -8 9.17552 4.78629   1
   9  -8  -5-0.54835 5.24101   3
  -8   5  -9 1.92465 4.87326  27
  -5   9  -8-1.02228 7.80979  27
  -9   5   8 2.17426 3.97942  13
  -5   8   9 9.16510 4.32708  13
   5   8  -9 2.15183 3.11102  15
  -5   8   9 3.94453 3.44721   6
  -8   9   5-0.56486 4.18783   6
   9   8   5 2.19172 3.85414   7
   5   9   8-2.94943 4.66391   7
   8   9  -5 2.29200 4.05817  24
  -8   5  -9-0.69530 5.34378  25
   9  -5   8 3.65588 1.83007  26
  -9  -5  -8 2.72586 7.10312  23
  -8  -9  -5-5.07102 5.72700  23
  -8  -9  -5 7.02750 4.73599  21
   8  -5  -9-2.46385 4.04363  22
   5  -8   9 1.09462 2.32546  20
  -5  -8  -9-1.46497 5.39555  21
  -5  -9   8 1.92814 2.01946  20
   8  -9   5 3.15457 2.53376  20
  -8   5  -9-2.50932 2.69241  19
  -9   8  -5-0.49652 3.02558  18
  -5  -8  -9 3.52527 2.41005  19
   8  -5  -9-2.17729 3.73412  15
   5  -8   9-1.07741 2.61403  16
  -5  -9   8 0.36350 2.54076  16
   5  -9  -8 1.08139 3.80330  15
   5   8  -9-2.77316 3.88842   7
  -5   8   9 1.63031 2.98502   8
   9   8   5 2.06825 4.98116   8
   8   5   9 1.97324 5.28505   8
   5   9   8 5.75428 4.82769   8
   8   9  -5 1.58335 4.26392   7
   9   5  -8 2.97803 3.68027   7
  -9   8  -5-2.27043 2.76959  10
  -8   5  -9 0.34317 2.11237   9
  -5  -8  -9 2.44456 2.83771   9
  -8   9   5 2.08518 3.26323  11
  -9   5   8 2.21732 2.72432  11
  -9  -5  -8 1.55783 2.97756   9
  -7  -9   8 1.91801 3.44586   5
  -8  -7   9 1.10817 3.92699   5
  -7   8   9 1.90602 3.53633   6
  -9   7   8 3.30788 3.69857   6
  -9  -8   7 0.54805 3.98903   5
   9  -8  -7-0.57887 4.98788   3
   7  -9  -8 4.36015 5.58542   3
   8  -7  -9 1.64529 4.89764   3
  -7   9  -8-5.14969 8.23142  27
  -8   7  -9-3.26877 6.24514  27
  -9   8  -7 1.75605 6.50944  27
   7   8  -9 5.02557 3.61599  15
  -7   8   9 4.42552 4.51002  13
  -8   9   7 3.65237 4.10179  13
  -9   7   8 9.28873 4.50616  13
   7   9   8 8.54383 4.98351   7
  -8   9   7 0.55913 4.32519   6
   8  -9   7 1.43943 1.88490  26
   9   7  -8 10.7406 5.72435  24
   8   9  -7 12.5547 5.50529  24
   9  -7   8-1.37616 2.07312  26
  -9  -7  -8-0.93520 7.18807  23
  -7  -8  -9 4.38049 7.33341  23
  -8  -9  -7 6.32823 4.80776  21
  -8  -9  -7 9.92015 6.28033  23
   7  -8   9-0.38078 2.49147  20
   8  -9   7 10.7063 3.13984  20
  -7  -8  -9-5.11265 5.31349  21
  -7  -8  -9-0.39245 2.37486  19
   9  -8  -7 0.51675 4.02085  15
   8  -7  -9 2.54026 4.02000  15
   7  -8   9 4.02573 2.80208  16
   7  -9  -8 1.70278 4.21053  15
   8   9  -7 5.04566 4.53138   7
   9   7  -8 2.78195 4.61379   7
   7   8  -9 3.26284 4.23093   7
   9   8   7-7.22280 5.64878   8
   8   7   9 15.8558 6.00417   8
  -7   8   9 0.50671 3.61651  11
  -8   9   7 1.65618 3.14158  11
  -9   7   8 6.05035 3.11473  11
  -9  -9   0 6.65428 3.64763   4
   0  -9   9 7.60210 3.23713   5
  -9  -9   0 11.2851 3.52256   5
  -9   0   9 9.48197 3.80461   5
   9   0  -9 7.08629 4.40823   1
  -9   0   9 0.37891 3.15456   2
   9  -9   0 12.3112 5.15743   3
  -9   9   0 15.8769 5.16699  27
   9   0  -9 7.92079 3.03350  28
   9  -9   0 5.54683 3.81477  30
   0   9   9 6.06306 4.53032  13
   0   9   9 14.5571 5.18545   7
   9   9   0 10.9021 4.30559   7
  -9   9   0 11.8470 4.31498   6
   0   9  -9 9.37606 8.44778  27
   9   9   0 9.51387 3.44384  24
   9   0  -9 13.1368 4.37885  22
  -9  -9   0 7.63763 5.80362  23
   9  -9   0 7.55966 3.36385  20
   0  -9   9 8.01061 2.76886  20
  -9   0  -9 12.4743 2.87784  19
   9   0   9 7.54444 4.04859  17
   0  -9   9 12.3119 3.64562  16
   0  -9  -9 10.2383 3.97025  15
   0   9   9 6.18614 3.97766   8
   9   9   0 6.86167 4.79850   8
  -9   9   0 14.5217 3.70792  11
  -9   0  -9 7.76032 3.14076   9
  -9  -9  -2 7.76636 3.84060   4
  -9  -9   2 0.46904 3.18600   4
  -9  -2   9 3.42059 3.75338   5
  -9  -9   2 1.80603 3.28750   5
  -2  -9   9 2.43121 2.85433   5
  -9   2   9 2.74869 3.25833   2
   9   2  -9 3.86136 4.47467   1
   9  -9  -2-5.02362 5.09029   3
  -9  -2   9 1.16240 2.85900   2
   9  -2  -9-0.65473 2.67735  28
  -9   9  -2 7.23394 5.84449  27
  -9   2  -9 3.98402 4.92642  27
   2   9  -9 2.73213 3.60343  15
  -9   2   9 2.41731 3.49662  13
  -2   9  -9-2.93981 3.54355  15
  -9  -2   9 0.67997 2.34675  14
  -2   9   9 3.54041 4.15222  13
  -9   9   2-0.54618 3.92306   6
  -2   9   9-2.27806 4.60259   7
  -9   9  -2-3.80353 3.92351   6
   9   9  -2 3.21846 4.14925   7
   9   9   2-0.56173 4.34474   7
   2   9   9 7.70937 4.81746   7
  -2   9  -9 7.89350 6.54242  25
  -2   9  -9 4.20494 8.26473  27
   9   2  -9 2.43631 3.85532  22
   9   9  -2 8.00889 3.80524  24
  -9  -9  -2 2.79947 4.92353  23
   9  -2  -9 4.17835 3.96431  22
  -2  -9  -9 9.50342 5.90809  21
   9  -9   2 3.95966 2.98912  20
   2  -9  -9-3.20752 5.87037  21
  -2  -9   9 3.26612 2.31903  20
  -9  -2  -9 4.30875 2.53813  19
  -9   2  -9 3.07484 2.55391  19
  -9   9  -2 3.29598 3.19099  18
   9  -2   9 1.45413 3.77157  17
  -2  -9   9 0.76149 2.60751  16
   2  -9   9 1.54941 2.78515  16
   2  -9  -9 2.07867 3.47590  15
  -2  -9  -9 6.73776 3.57415  15
   9  -2  -9 3.17557 3.43830  15
  -2   9   9 5.24180 3.65956   8
   2   9  -9-3.83043 3.36342   7
   9   2   9-0.56080 4.85425   8
   2   9   9 3.21874 4.12573   8
  -9   2  -9 1.94798 2.48590   9
   9   9  -2 4.87055 4.57125   8
  -9  -9   2 1.39576 3.23011  12
  -9   9   2 0.48238 2.91514  11
  -9  -2  -9 3.42434 2.72999   9
  -4  -9   9 8.59779 3.26856   5
  -9  -4   9 7.31932 4.17051   5
  -9  -9  -4 0.98164 3.47840   4
  -9  -9   4 2.93353 3.71632   5
  -9  -4   9 4.35719 2.92164   2
  -9   4   9 2.13834 3.11364   2
   4  -9  -9 3.39856 4.71927   3
   9  -9  -4 8.29081 4.98231   3
   9   4  -9 7.55746 4.90653   1
   9  -4  -9 0.73567 3.21508  28
  -9   9  -4 0.83325 6.25375  27
  -9   4  -9 2.55665 4.91373  27
  -4   9   9-0.61726 3.99765  13
  -9   4   9 6.54294 4.33616  13
   4   9  -9 0.92071 3.45780  15
  -9  -4   9 2.68689 2.57082  14
   9   9   4-2.30681 4.35619   7
   4   9   9-3.62693 4.88431   7
   9   9  -4 2.33550 4.02176  24
  -4   9  -9-3.16612 7.91975  27
   9  -4   9 0.22511 1.70715  26
  -9  -4  -9 11.4429 7.62082  23
  -9  -9  -4 0.59948 4.18836  21
   9   4  -9 2.58345 4.01923  22
   9  -4  -9 5.31213 3.90330  22
  -9  -9  -4 7.40859 5.52684  23
   4  -9   9 0.77413 2.74498  20
  -4  -9   9 3.08154 2.28955  20
  -4  -9  -9-1.56336 5.64841  21
   9  -9   4 4.16757 2.89365  20
   9  -4   9-1.47404 3.88692  17
  -9   4  -9 1.09741 2.43023  19
  -4  -9  -9-1.28990 2.78721  19
  -9   9  -4 2.18041 3.19777  18
  -9  -4  -9-0.34016 2.34686  19
   9  -4  -9-2.14039 3.42432  15
   4  -9   9 8.14989 3.34564  16
  -4  -9   9 1.09394 2.55105  16
   4  -9  -9 4.94000 3.96800  15
   4   9  -9 1.80267 3.71884   7
   9   4  -9-1.55377 4.35813   7
   9   4   9 1.95781 5.32779   8
   9   9  -4 5.01391 4.02727   7
   4   9   9 0.62977 4.95281   8
   9   9  -4 2.44675 4.33322   8
  -9   4  -9 1.87582 2.22592   9
  -9   9   4 0.52145 3.56649  11
  -9  -4  -9 3.52150 2.96748   9
  -6  -9   9 17.5205 4.34390   5
  -9   9   6 20.0374 5.18191   6
  -9   6   9 18.7802 4.71113   6
  -9  -9   6 22.4458 5.09257   5
  -9  -6   9 9.95384 3.94238   2
   6  -9  -9 19.7207 6.24923   3
   9  -9  -6-1.86197 5.92274   3
   9  -6  -9 16.8025 5.54556   3
  -9   6  -9 27.0448 7.24775  27
  -6   9  -9 21.6623 8.89141  27
   6   9  -9 17.2521 4.65071  15
  -6   9   9 18.5777 5.50955  13
  -9   6   9 14.2732 5.08110  13
   9   9   6 23.5091 5.69962   7
   6   9   9 20.3867 5.96355   7
  -6   9   9 18.9015 4.83055   6
   9   9  -6 25.2224 5.95969  24
   9  -6   9 24.2391 3.08844  26
  -9  -9  -6 16.4947 5.82500  21
  -9  -6  -9 17.7245 8.35338  23
   9  -6  -9 26.4170 5.76303  22
  -9  -9  -6 20.1395 7.68820  23
   6  -9   9 17.3967 3.81787  20
  -6  -9  -9 26.6864 6.85255  21
   9  -9   6 19.1250 3.86561  20
  -9   9  -6 20.0148 4.63012  18
  -6  -9  -9 18.1785 3.89747  19
   9  -6   9 18.3369 3.71631  16
   6  -9  -9 10.9516 4.78033  15
   9  -6  -9 21.6651 5.12462  15
   6  -9   9 10.1501 3.63659  16
   9   6  -9 21.6290 5.44842   7
   9   9  -6 18.5937 5.36123   7
   6   9  -9 19.1195 5.55183   7
   9   6   9 10.8601 6.14956   8
   6   9   9 30.1369 6.76117   8
  -6   9   9 23.2087 4.84920  11
  -9   9   6 14.4184 4.36117  11
  -9   6   9 22.2978 4.39783  11
  -9  -6  -9 22.6556 4.23432   9
   8  -9  -9 7.83146 5.75762   3
   9  -8  -9 4.92527 5.18767   3
  -9   8  -9 9.61370 7.97222  27
  -9   9  -8 6.31356 7.55765  27
  -8   9  -9 5.46027 7.46863  27
  -8   9   9 9.66825 5.03195  13
  -9   8   9 4.85387 4.60827  13
  -9   9   8-8.18529 5.25163  13
   9   9  -8 0.75725 5.44380  24
   9  -9   8 6.63191 2.03275  26
  -9  -9  -8 0.95712 7.27562  23
  -8  -9  -9 7.62499 7.49912  23
  -9  -8  -9 2.02289 6.71242  23
   8  -9   9 2.53297 2.63884  20
   9  -9   8 1.65392 2.67471  20
   9   9  -8 10.0975 5.13410   7
   9   8  -9-1.89251 4.85856   7
   9   9   8 3.09458 5.63458   8
   8   9  -9 1.86244 4.99815   7
   9   8   9 1.55283 5.83478   8
   9  -9  -8 5.29984 4.32198  15
   8  -9  -9 7.20854 4.46421  15
   9  -8  -9 2.25439 3.89328  15
   8  -9   9 2.38427 2.63467  16
  -8  -9   9 8.57562 4.08375   5
  -9  -8   9 6.42710 3.97662   5
  -8   9   9 6.00750 4.13597   6
  -9  -9   8 3.32526 4.12066   5
  -9   9   8 3.98677 4.23389   6
  -9   8   9 6.20347 3.74895   6
  -8   9   9 8.59106 3.75144  11
  -9   9   8 3.47464 3.23604  11
  -9   8   9 1.59903 3.20212  11
 -10   0   0 1.19367 2.20033   5
  10   0   0 3.18759 2.40625   1
 -10   0   0 2.68214 2.62226   2
 -10   0   0 1.45569 2.23964  14
   0   0  10-0.71551 3.16670  13
   0  10   0 0.37981 2.93718   7
   0  10   0 3.36140 3.53794   6
  10   0   0 0.90443 1.53232  26
   0   0 -10-1.19224 3.37576  25
   0 -10   0 1.35678 3.15926  21
  10   0   0 1.66298 2.18999  24
 -10   0   0 3.88542 3.57853  23
   0   0 -10 3.65737 2.79792  22
   0   0  10 3.14118 1.87053  20
   0 -10   0-0.29225 2.12761  20
   0   0  10 0.38366 2.94984  17
   0   0 -10 0.46769 1.73641  19
   0   0 -10-0.27143 2.20618  15
   0   0  10-0.31947 2.96138   8
 -10   0   0 1.82837 2.15603  10
 -10  -1   1 28.8203 4.41328   5
 -10   1   1 31.8870 4.26603   5
 -10  -1  -1 33.3612 4.63285   5
 -10   1  -1 29.9952 4.14622   5
  10   1  -1 33.3140 4.59138   1
 -10   1  -1 21.8480 4.15234   2
 -10   1   1 33.1632 4.42242   2
 -10  -1  -1 24.8742 4.07797   2
 -10  -1   1 27.1493 4.25636   2
  10   1  -1 38.3184 4.76179  29
  10  -1   1 43.3308 4.86905  29
  10  -1  -1 36.3774 4.74041  29
  10   1   1 27.0622 4.28122  29
  -1  -1  10 33.3807 4.66875  13
 -10   1  -1 25.4765 4.18504  14
 -10  -1  -1 34.9240 4.54126  14
  -1 -10  -1 28.0385 4.76248  12
   1   1  10 25.0483 5.05902  13
 -10   1   1 31.8911 4.39785  14
  -1   1  10 33.9228 5.00049  13
  -1  10   1 23.6458 5.39060   6
   1  10  -1 36.2517 5.15354   7
   1  10   1 29.6930 5.14667   7
  -1  10   1 32.6892 4.92087   7
   1  10  -1 28.0632 5.36148   6
   1  10   1 32.8354 5.41552   6
  -1  10  -1 28.8238 4.67641   7
   1   1 -10 28.8277 5.21405  25
  10   1   1 36.3017 3.80797  26
  10   1  -1 37.2293 3.81273  26
  10  -1   1 33.8409 3.71214  26
  10  -1  -1 32.0586 3.62605  26
  -1  -1 -10 25.1636 5.22132  25
  -1   1 -10 21.0906 5.12196  25
   1  -1 -10 22.0664 4.74572  25
  10  -1  -1 39.6339 4.59686  24
  10   1  -1 48.5323 5.11309  24
  -1 -10  -1 24.7868 5.18614  21
  -1  -1 -10 23.1022 4.58519  22
   1 -10   1 28.3965 4.84099  21
 -10   1   1 35.4744 4.85308  23
 -10  -1   1 43.6848 5.62695  23
   1  -1 -10 28.2893 5.03180  22
 -10  -1  -1 30.5605 5.72737  23
  -1   1 -10 27.9135 4.56346  22
 -10   1  -1 27.1570 5.03263  23
   1   1 -10 31.7259 4.92781  22
  -1 -10   1 25.4453 5.07570  21
   1  -1  10 27.9600 3.87492  20
  -1   1  10 28.4897 3.99657  20
   1 -10  -1 24.6975 5.03426  21
   1   1  10 23.3306 3.76107  20
  -1 -10   1 31.5780 4.19972  20
  -1  -1  10 27.1005 3.99159  20
  -1 -10  -1 29.4346 4.17659  20
   1 -10   1 28.8636 4.25071  20
   1 -10  -1 24.4522 4.24580  20
  -1   1  10 32.0143 4.89551  17
   1  -1 -10 32.4095 3.98771  19
  -1  -1 -10 37.8068 4.20096  19
   1   1 -10 35.3755 3.93878  19
  -1   1 -10 31.5642 3.97730  19
   1  -1  10 28.7259 5.02490  17
  -1  -1  10 36.8553 5.01538  17
   1 -10   1 43.5515 4.92350  16
  -1  -1 -10 35.0532 4.31158  15
   1  -1 -10 32.5587 4.45723  15
   1   1 -10 43.9422 4.65337  15
  -1   1 -10 27.1523 4.16874  15
  -1   1  10 39.2092 4.91109   8
   1   1  10 36.6637 5.32215   8
   1  -1  10 34.0627 4.66498   8
   1  10  -1 21.7541 4.12896   8
  -1  -1  10 23.8960 4.36778   8
 -10   1  -1 31.3408 4.28752  10
 -10  -1   1 34.4886 4.25516  10
  10   1   1 18.2158 4.92358   8
 -10   1   1 37.7283 4.30287  10
 -10  -1  -1 37.8815 4.38162  10
 -10   0   2 68.1895 6.99682   5
 -10   2   0 61.1960 6.65208   5
 -10   0  -2 68.0009 7.10464   5
 -10   2   0 62.7088 6.97133   2
 -10   0  -2 54.1342 6.61910   2
 -10   0   2 60.9160 7.08231   2
 -10  -2   0 59.0205 6.78616   2
  10   2   0 57.7149 6.92529   1
   2   0 -10 57.0330 6.52672   1
  10   0  -2 79.2582 7.36622   1
  10   0  -2 80.9328 7.55142  29
  10   2   0 65.3301 7.07476  29
  10  -2   0 67.1105 7.30941  29
  10   0   2 70.3259 7.22829  29
  -2  10   0 64.6667 8.64625  27
 -10   0  -2 52.5954 7.97868  27
  10  -2   0 62.6367 6.87211  28
 -10   2   0 47.7647 7.39082  27
   0   2  10 63.8347 7.81723  13
  -2   0  10 67.0857 7.37363  13
   0 -10  -2 60.9841 7.24216  12
   2   0  10 56.1578 7.51050  13
 -10   0   2 63.6050 6.94241  14
 -10   2   0 47.4846 6.61265  14
  -2  10   0 53.2705 8.06686   6
   0  10   2 58.6798 7.88867   6
   2  10   0 57.5696 7.64792   7
   2  10   0 58.0410 7.76439   6
  10  -2   0 78.0693 7.03703  24
   0   2 -10 52.9814 7.72626  25
  10   2   0 89.0104 7.77921  24
   2   0 -10 51.8966 7.33576  25
  10   2   0 73.1382 6.47777  26
  10   0   2 70.9721 6.38738  26
  10   0  -2 70.6492 6.36545  26
  -2   0 -10 44.2721 7.58198  25
  10  -2   0 70.1212 6.38678  26
   0  -2 -10 42.5849 7.46929  25
  10   0  -2 75.7310 7.40923  24
 -10  -2   0 52.7604 7.87970  23
   0  -2 -10 62.4671 7.62958  22
  -2   0 -10 57.7077 7.03710  22
   0   2 -10 64.8551 7.20423  22
 -10   2   0 63.9203 7.27319  23
   0 -10   2 42.1119 7.12161  21
  -2 -10   0 63.8353 7.92283  21
   2 -10   0 55.4631 7.32391  21
 -10   0  -2 50.2783 7.92049  23
   2   0 -10 47.7121 7.19560  22
   0 -10   2 63.6158 6.87519  20
  -2 -10   0 55.9141 6.59444  20
   2 -10   0 57.8697 6.97257  20
   0 -10  -2 56.9079 8.05827  21
  -2   0  10 64.9776 6.75114  20
   2   0  10 57.0457 6.46031  20
   0  -2  10 67.8366 6.67081  20
  -2   0  10 60.0697 7.23185  17
   0  -2  10 67.3997 7.60525  17
   0 -10   2 82.1185 7.43014  16
   2   0 -10 67.8444 6.59950  19
  -2   0 -10 71.1996 6.76537  19
 -10   2   0 64.2684 6.75417  18
   0   2 -10 67.9220 6.55103  19
   0  10  -2 55.7000 7.02997  18
   0  -2 -10 62.8356 6.64657  19
   2   0  10 52.0282 7.44145  17
   0  -2 -10 63.7204 6.87829  15
  -2   0 -10 58.7673 6.64704  15
   0   2 -10 66.1929 6.97055  15
   0  10  -2 50.4012 7.00667   7
  -2  10   0 55.9543 7.17055   7
   0  10   2 61.8733 7.77610   7
   2   0  10 60.4626 7.39999   8
   0   2  10 66.7995 7.55734   8
  10   2   0 63.7144 7.83873   8
   2  10   0 63.2163 7.24246   8
   0  -2  10 67.4522 7.08646   8
  -2   0  10 61.1433 7.13122   8
   0  10   2 58.5129 6.97800   8
 -10   2   0 68.8190 6.90437  10
 -10   0   2 71.9453 6.81982  10
 -10   0  -2 63.8594 6.95687  10
 -10  -2   0 69.0923 6.84852  10
 -10  -2   2 284.055 33.3889   5
 -10   2   2 386.514 33.2246   5
 -10  -2  -2 365.899 33.5888   5
 -10   2  -2 419.281 33.4845   5
 -10   2  -2 343.596 33.2538   2
 -10   2   2 330.529 33.4098   2
 -10  -2  -2 298.828 32.9668   2
 -10  -2   2 311.800 33.2659   2
  10   2  -2 396.249 33.6330   1
   2   2 -10 391.270 33.1931   1
  10   2  -2 445.275 33.9272  29
  10  -2  -2 432.857 33.9427  29
  10   2   2 426.646 33.5656  29
   2 -10  -2 318.454 33.3803  30
  -2  10   2 447.986 34.2218  27
  -2  10  -2 360.714 35.2247  27
 -10   2   2 292.816 33.4882  27
  10  -2   2 376.865 33.3353  28
  10  -2  -2 376.273 33.3838  28
  -2   2  10 403.958 34.2074  13
   2 -10  -2 364.038 33.6587  12
 -10   2   2 340.412 33.3073  14
  -2 -10  -2 387.148 34.0383  12
 -10  -2   2 375.500 33.4182  14
   2  10   2 337.097 33.9131   6
  -2  10  -2 371.677 34.6013   6
  -2  10   2 390.664 34.4314   6
  -2  -2 -10 319.792 34.0254  25
  -2   2 -10 324.693 34.0236  25
   2  -2 -10 324.280 33.5819  25
   2   2 -10 342.836 33.9732  25
  10  -2   2 424.023 33.0179  26
  10  -2  -2 387.608 32.9069  26
  10  -2  -2 412.712 33.5612  24
  10   2  -2 529.236 34.5398  24
   2  -2 -10 370.424 33.9518  22
  -2   2 -10 308.584 33.1658  22
 -10   2  -2 348.327 33.9686  23
   2   2 -10 373.123 33.7179  22
 -10  -2  -2 331.962 34.6051  23
  -2 -10   2 347.151 33.9932  21
  -2 -10  -2 358.435 34.4350  21
   2 -10  -2 316.660 34.0292  21
  -2 -10   2 388.314 33.2529  20
   2  -2 -10 381.176 33.2487  19
   2 -10   2 390.930 33.6100  20
  -2 -10  -2 356.646 33.1650  20
   2   2  10 319.366 32.9522  20
   2  -2  10 400.530 33.2426  20
   2  -2  10 388.254 34.1160  17
 -10   2  -2 372.247 33.2379  18
  -2  -2 -10 406.240 33.3572  19
   2   2 -10 415.146 33.1262  19
  -2   2 -10 405.527 33.2658  19
   2 -10   2 478.074 33.9786  16
  -2  10  -2 345.759 33.7423  18
  -2  -2 -10 359.639 33.1789  15
   2   2 -10 425.863 33.6975  15
  -2   2 -10 374.985 33.3516  15
   2  10  -2 391.405 33.9986   7
  -2  10  -2 378.787 33.5057   7
   2  10   2 390.544 34.2933   7
  -2  10   2 405.351 34.0834   7
   2   2  10 381.258 34.0053   8
   2  -2  10 380.770 33.4189   8
   2  10  -2 374.296 33.5208   8
  10   2   2 329.980 34.1298   8
  -2   2  10 421.408 33.9301   8
   2  10   2 335.906 33.7004   8
  -2  -2  10 379.866 33.5204   8
 -10  -2   2 386.594 33.2509  10
  -3 -10   1 66.3331 7.60849   4
 -10  -1   3 49.2749 6.17473   5
 -10  -3  -1 50.5003 6.36636   5
 -10   3   1 51.4830 5.66193   5
 -10   1  -3 62.4267 6.34110   5
 -10   3   1 48.4218 6.34111   2
 -10   1  -3 55.4286 5.95118   2
 -10  -1   3 57.2447 6.32507   2
 -10  -3  -1 37.4045 5.65645   2
  10   3  -1 45.6647 6.24652   1
   3   1 -10 48.7058 5.93767   1
 -10   3   1 46.3943 6.82065  27
 -10   1  -3 51.4175 7.48934  27
  10   3  -1 56.9409 6.37453  29
  10  -1  -3 68.0688 6.85361  29
  10  -3   1 68.6346 6.85289  29
  10  -3   1 53.2320 6.23869  28
  -1 -10  -3 48.4752 6.65961  12
  -3   1  10 61.0790 6.96181  13
  -1  10   3 49.3677 7.18049  13
   1   3  10 44.6015 7.25701  13
 -10  -1   3 50.4632 6.02314  14
 -10   3   1 47.5569 5.92788  14
  -3  10  -1 57.1117 7.65706   6
  -1  10   3 55.6170 7.40877   6
   3  10   1 35.4468 6.62300   6
   3  10   1 47.3222 6.99190   7
 -10   3   1 46.0543 5.85517   6
   1  10  -3 59.7718 7.40891   6
  -1  10   3 62.9132 7.40156   7
  -1   3 -10 54.2117 7.58542  25
   3   1 -10 45.8638 6.79645  25
  -3  10  -1 54.9624 7.98539  27
  -3  -1 -10 48.4512 7.32816  25
  10   1   3 59.6960 5.66244  26
   1  -3 -10 42.9499 6.64275  25
  10  -3   1 59.7446 5.56641  26
  10  -1  -3 49.9012 6.18949  24
  10   3  -1 82.8618 7.27781  24
   1  -3 -10 54.3854 7.10518  22
  -1   3 -10 50.8577 6.13888  22
   3   1 -10 52.2630 6.77442  22
  -3 -10   1 58.3730 7.35907  21
 -10  -3  -1 45.3535 7.52163  23
 -10   1  -3 61.1087 7.76657  23
  -3 -10   1 59.4955 5.84868  20
   1 -10   3 49.7593 6.03640  20
  -1 -10  -3 38.9389 7.36582  21
   3 -10  -1 32.0423 6.44817  21
   1  -3 -10 53.7357 5.96997  19
  -1  -3  10 52.7721 5.82725  20
   3  -1  10 50.3854 5.70825  20
  -3   1  10 45.9545 6.20163  17
  -3  -1 -10 49.7063 5.80978  19
  -3  10  -1 53.6709 6.61711  18
  -1   3 -10 55.3006 5.82243  19
   1 -10   3 63.0963 6.48763  16
  -3  -1 -10 50.9502 5.80050  15
   3   1 -10 57.8418 6.35572  15
  -1   3 -10 56.2238 6.28846  15
   1  -3 -10 58.6362 6.40099  15
   1  10  -3 51.5971 6.57374   7
   1   3  10 46.7205 6.81251   8
   3  10   1 48.4470 6.72005   8
  10   1   3 50.0843 7.15356   8
  -3  10  -1 48.4714 6.31172   7
   3  -1  10 53.3922 6.55603   8
  10   3  -1 42.3280 6.79303   8
  -3   1  10 63.7887 6.79796   8
  -3  10  -1 34.2592 5.93160  11
  -1  -3  10 66.3874 6.41397   8
 -10  -1   3 65.1582 6.09077  10
 -10   1   3 51.6535 5.85390   5
 -10   3  -1 66.1769 5.98657   5
 -10   3  -1 46.9741 6.32494   2
  10   1  -3 58.9509 6.75513   1
 -10  -1  -3 44.2154 5.61399   2
 -10  -3   1 35.3920 5.80080   2
 -10   1   3 47.7417 6.21746   2
 -10   3  -1 52.4094 7.35729  27
   1 -10  -3 57.9182 6.47874  30
  10   3   1 55.2321 5.98489  29
  10  -3  -1 71.9934 6.69652  29
 -10  -1  -3 40.7225 6.98872  27
  10  -3  -1 46.2786 5.85904  28
  -3 -10  -1 52.3369 6.83533  12
  -3  -1  10 65.0369 6.52428  13
 -10   1   3 47.5924 6.03927  14
   1 -10  -3 44.6099 6.46446  12
 -10   3  -1 51.1058 5.90226  14
 -10  -3   1 49.0199 6.09283  14
  -1   3  10 48.6481 7.03197  13
   1  10   3 46.0463 6.84343   6
  -3  10   1 61.8016 7.61873   6
   3  10  -1 40.4550 6.66552   7
 -10   3  -1 52.7332 5.68658   6
   1  10   3 45.9399 7.31868   7
  -1  10  -3 39.7208 7.56286   6
   3  -1 -10 46.0231 6.43006  25
   1   3 -10 46.9554 7.26226  25
  -3  10   1 52.9872 7.33480  27
  -1  -3 -10 52.5006 7.17023  25
  10  -1   3 50.7858 5.46145  26
  -3   1 -10 32.3531 6.89634  25
  10  -3  -1 54.2970 5.51938  26
  10   1  -3 66.3550 6.82412  24
   1   3 -10 50.6963 6.37527  22
 -10   3  -1 51.4673 6.28950  23
  -3 -10  -1 41.3901 7.04150  21
  -3   1 -10 36.9955 5.79874  22
 -10  -3   1 53.7618 7.86593  23
   3  -1 -10 51.5667 6.92701  22
 -10  -1  -3 45.3233 7.88925  23
  -1 -10   3 57.0731 5.98908  20
  -3 -10  -1 55.9392 5.75615  20
   3   1  10 45.7087 5.52753  20
  -1  -3 -10 59.2808 6.09353  19
   1  -3  10 48.2493 5.74366  20
   1 -10  -3 55.3946 7.95258  21
  -1 -10   3 57.2044 6.40159  16
   3 -10   1 66.4816 6.46784  16
   1  -3  10 55.2893 7.11014  17
  -3  -1  10 59.8315 6.50273  17
   3  -1 -10 59.4475 5.86931  19
 -10   3  -1 55.3288 6.05232  18
  -1  10  -3 59.1476 6.47099  18
  -3   1 -10 61.0649 5.95602  19
   1   3 -10 48.9306 5.56601  19
   3  -1 -10 67.0894 6.49220  15
  -3   1 -10 65.6262 6.06315  15
  -1  -3 -10 59.4547 6.14147  15
  -1  10  -3 47.7287 6.27344   7
  -3  10   1 55.7645 6.58433   7
  -1   3  10 49.3533 6.91603   8
   3  10  -1 42.8517 6.41626   8
   1  10   3 42.2624 6.44059   8
  10   3   1 48.2043 6.97430   8
   1  -3  10 50.8465 6.04510   8
  -3  -1  10 53.6403 6.36500   8
   3   1  10 53.6194 6.85526   8
 -10   3   3 22.5464 2.92228   5
 -10   3  -3 16.2661 3.71322   5
 -10   3   3 17.5087 3.62636   6
 -10  -3   3 12.0146 3.61583   5
  -3  -3  10 20.0704 4.11854   5
 -10  -3  -3 21.1761 3.88048   5
  10   3  -3 17.8084 4.19723   1
 -10  -3  -3 17.8515 3.04458   2
 -10  -3   3 11.7043 3.35898   2
 -10   3  -3 12.9987 3.58075   2
   3   3 -10 17.9092 3.80725   1
 -10   3   3 12.1404 3.80356   2
  -3 -10   3 22.1835 4.57507   4
  10  -3   3 17.7724 3.49531  28
  10  -3  -3 23.2451 3.79551  28
  10  -3  -3 21.6068 3.88566  29
  10   3   3 19.8281 3.36050  29
 -10  -3   3 13.4313 3.26335  14
  -3   3  10 12.4510 4.17206  13
 -10   3   3 20.2983 3.56541  14
  -3   3 -10 12.4516 3.24019  15
   3  10  -3 23.6177 4.31016   7
  -3  10  -3 22.0619 5.46298   6
  -3  10   3 15.3155 4.66888   6
   3  10   3 14.9035 4.07913   6
  -3  10   3 13.9444 4.45542   7
  -3  10  -3 18.7385 6.46534  27
  -3  -3 -10 12.2839 4.84328  25
  -3   3 -10 20.8473 5.50666  25
  10  -3   3 16.5457 2.64521  26
   3   3 -10 17.1727 4.14655  22
  10   3  -3 22.7527 4.25580  24
 -10  -3  -3 7.33082 5.26196  23
  -3 -10  -3 13.0620 5.12607  21
 -10   3  -3 33.2500 4.91059  23
  -3 -10   3 22.4805 2.95015  20
   3 -10  -3 11.4372 4.48044  21
  -3  -3  10 12.7054 2.95805  20
   3  -3  10 20.0746 3.05910  20
  -3   3 -10 20.4327 3.14784  19
   3  -3 -10 15.3731 3.13233  19
  -3  -3  10 15.3260 2.83508  16
  -3  10  -3 15.6620 3.69088  18
   3  -3  10 17.9993 4.44191  17
   3 -10   3 15.0399 3.45975  16
  -3 -10   3 14.6982 3.68520  16
   3   3 -10 10.3072 3.41176  15
  -3  -3 -10 14.5602 2.95389  15
   3  -3 -10 18.4741 3.85213  15
   3   3  10 14.4121 4.30215   8
  10   3   3 14.3468 4.56931   8
  10   3  -3 8.47382 3.16918   7
  -3   3  10 12.1838 3.85976   8
   3  10   3 16.6809 4.28980   8
 -10   3  -3 12.6212 3.24579  10
 -10  -3   3 23.0156 3.15744  10
  -3 -10  -3 22.4515 4.32286  12
  -3   3 -10 19.9333 3.38215   9
  -3  10  -3 13.2683 2.81647  11
   3  10  -3 19.4989 3.97450   8
 -10   4   2 33.2899 4.52967   6
 -10  -4  -2 25.3045 4.72734   5
 -10   2  -4 38.2520 5.00376   5
 -10  -2   4 25.4631 4.76238   5
 -10   4   2 34.7085 3.97296   5
  -4   2  10 28.8180 4.93493   5
  10   4  -2 33.2961 5.25379   1
  -4 -10   2 39.1810 5.91610   4
 -10   4   2 34.4319 5.08293   2
   2  -4 -10 42.4704 5.22009   3
   4   2 -10 28.2834 4.79848   1
  10  -4   2 30.3930 4.59453  28
 -10   2  -4 34.9804 6.41362  27
   4 -10  -2 32.6042 4.99360  30
  10  -2  -4 42.1239 5.46454  29
  10  -2  -4 37.8770 4.73207  28
 -10   4   2 33.1578 5.45783  27
  -4   2  10 50.5657 5.88536  13
  -2   4 -10 29.3546 4.66583  15
  -2  10   4 21.0469 5.11257  13
 -10   4   2 30.3495 4.45919  14
 -10  -2   4 30.6415 4.53919  14
   2  10  -4 22.2961 4.93978   7
  -2  10   4 29.0463 5.70677   6
   4  10   2 37.1014 5.97907   7
   4  10   2 27.7830 5.45411   6
  -4  10  -2 34.8609 6.16525   6
  -2  10   4 38.7392 5.77685   7
  -4  -2 -10 34.6491 6.40421  25
  -4  10  -2 26.8860 6.88145  27
  10  -4   2 37.5301 4.01050  26
  -2   4 -10 32.1904 6.56267  25
  10  -2  -4 30.6098 4.65034  24
 -10   2  -4 36.2549 6.36946  23
  -2   4 -10 29.2676 4.43939  22
   4   2 -10 27.7424 5.20119  22
  10   4  -2 40.0858 5.52934  24
   2 -10   4 38.3056 4.72892  20
  -2  -4  10 31.4634 4.30969  20
  -2 -10  -4 30.3494 6.35288  21
   2  -4 -10 32.1150 4.52189  19
   4  -2  10 35.1110 4.26117  20
  -2   4 -10 33.5109 4.26445  19
  -4  10  -2 30.9352 5.11870  18
   2 -10   4 46.6731 5.03981  16
   4  -2  10 22.2372 5.06360  17
   4   2 -10 32.2097 4.84092  15
  -2  -4  10 26.7687 4.25019  16
  -4  -2 -10 30.8642 4.11559  15
   2   4  10 39.4238 6.05110   8
  10   4  -2 34.8154 5.06593   7
  10   2   4 31.5894 5.91503   8
   4  10   2 33.7811 5.61140   8
 -10   2  -4 37.4108 4.72821  10
  -2   4 -10 40.4673 4.55691   9
  -2 -10  -4 26.3920 5.02336  12
  -4  10  -2 33.1281 4.44086  11
   2  10  -4 28.2440 4.68197   8
 -10   4   0 7.90542 2.61275   6
 -10   0   4 9.84794 2.87903   5
 -10   4   0 6.81560 2.30987   5
  -4   0  10 4.94057 3.24042   5
 -10  -4   0 0.39358 2.89252   5
   4   0 -10 10.5234 3.14962   1
 -10   4   0 8.32687 3.32431   2
  10   4   0 6.20523 3.01366   1
  10   0  -4 3.22360 3.65200   1
 -10   0  -4 5.58984 4.61614  27
  10  -4   0 10.8046 2.93950  28
 -10   4   0 9.62537 4.30840  27
   0 -10  -4 7.69316 2.61098  30
  10   4   0 9.90575 2.90386  29
  10  -4   0 9.85641 3.24740  29
 -10   4   0 6.96681 2.40325  14
   0   4 -10 9.40649 3.10417  15
  -4   0  10 4.64472 3.04004  13
   0   4  10 12.2334 4.66405  13
   0  10   4 6.60120 3.73822   6
  -4  10   0 4.95254 4.32244   6
   0  10  -4-3.89002 4.46033   6
   0  10   4 11.9959 4.21629   7
   0  10  -4 3.05600 2.93644   7
  -4  10   0 5.81557 4.20236  27
  -4   0 -10 3.10246 4.32955  25
   0  -4 -10 6.27714 4.00239  25
  10   0   4 7.76115 2.17733  26
   4   0 -10 5.86304 3.59545  25
  10   0  -4 12.8112 3.40070  24
 -10   0  -4 7.70107 4.99877  23
   0   4 -10 3.06720 3.01823  22
  10   4   0 6.79269 3.48500  24
  -4 -10   0 8.41576 4.42411  21
 -10  -4   0 2.96587 4.46715  23
   4 -10   0 3.82010 2.70250  20
   4   0  10 7.00462 2.16038  20
   0 -10  -4 13.5209 4.98257  21
   0 -10   4 7.50437 2.55242  20
   0  -4  10 6.25232 2.27151  20
   0   4 -10 11.1525 2.41636  19
   4   0  10 12.7468 4.11024  17
   0  -4 -10 6.69753 2.56175  19
   0  10  -4 9.33375 2.98714  18
 -10   4   0 14.2370 3.00010  18
  -4   0 -10 13.0425 2.63557  19
  -4   0  10 5.65836 2.84320  17
   4   0 -10 7.00470 3.18864  15
  -4   0 -10 6.12938 2.40768  15
   0  -4 -10 9.54849 2.99080  15
   4 -10   0 5.66567 2.92399  16
   0 -10   4 4.15674 2.76401  16
   4   0  10 9.08284 3.54021   8
   0   4  10 9.87248 4.14882   8
   4  10   0 5.01964 3.50467   8
   0  -4  10 7.99332 2.87513   8
  -4   0  10 4.38718 2.86521   8
   0  10   4 9.79907 3.45103   8
  10   4   0 5.74263 3.84672   8
   0 -10  -4 4.43012 3.06759  12
  -4   0 -10 13.6603 3.06361   9
  -4  10   0 2.00019 2.80383  11
 -10   0   4 7.39634 2.58602  10
 -10   4  -2 25.2219 4.07419   6
 -10   2   4 36.4498 4.33359   5
 -10  -4   2 23.6809 4.99437   5
 -10  -2  -4 45.9663 5.37446   5
 -10   4  -2 48.3319 4.82466   5
  -4  -2  10 44.1929 5.82467   5
 -10  -4   2 33.6152 4.81365   2
  10   2  -4 42.4056 5.80678   1
  -2 -10   4 37.2423 5.83454   4
  10  -4  -2 36.4802 4.82759  28
 -10   4  -2 38.4253 6.54104  27
  10   4   2 28.9742 4.38928  29
  10  -4  -2 41.3333 5.22032  29
 -10  -4   2 36.9132 4.81224  14
 -10   4  -2 31.0736 4.44485  14
  -4  -2  10 31.1985 4.84658  13
 -10   2   4 33.4193 4.70501  14
  -2   4  10 27.8999 5.61893  13
   2  10   4 35.1868 5.58848   6
   4  10  -2 40.2560 5.76075   7
  -4  10   2 41.2207 6.42614   6
  -4  10   2 36.6857 5.49479   7
  -2  10  -4 34.6296 6.76257   6
  10   2  -4 30.6047 5.23088  24
  -2  -4 -10 25.9488 5.68078  25
  -4  10   2 33.6374 5.56045  27
  -4   2 -10 38.1099 6.93602  25
  10  -2   4 35.1549 4.05940  26
   2   4 -10 31.0573 5.19153  22
  -4 -10  -2 31.1138 6.02620  21
   4  -2 -10 37.7422 5.68795  22
 -10  -2  -4 34.7840 7.52200  23
  -2 -10   4 34.4623 4.39709  20
   4  -2 -10 42.2184 4.51056  19
   4 -10   2 30.6513 4.79270  20
   2 -10  -4 26.4632 6.14979  21
  -4  -2  10 35.1247 4.47374  20
   2  -4  10 36.2952 4.54415  20
  -4  -2  10 31.1940 4.08102  16
 -10   4  -2 41.7117 4.89657  18
  -4   2 -10 40.5707 4.58856  19
  -2  10  -4 24.3816 4.84177  18
  -2  -4 -10 28.5406 4.42285  19
  -4   2 -10 39.6141 4.67129  15
   4 -10   2 34.2514 4.74129  16
   2 -10  -4 27.7138 5.39419  15
   4  -2 -10 42.9128 5.27963  15
   2   4 -10 38.6574 5.15566  15
  -2  -4 -10 37.6192 4.67611  15
   4   2  10 34.6048 5.77936   8
  -2   4  10 32.2137 5.41458   8
  10   4   2 47.4642 6.34932   8
   2  10   4 29.0999 5.53129   8
  10   2  -4 29.3099 4.70544   7
   4  10  -2 27.4822 5.04447   8
   2 -10  -4 27.8216 4.85496  12
  -4 -10  -2 33.6042 5.56742  12
  -4   2 -10 39.3107 4.82956   9
 -10   4  -2 30.2719 4.55689  10
 -10  -4  -4 18.9207 3.79926   5
   4   4 -10 11.3344 3.61015   1
  -4 -10   4 3.56420 3.49234   4
  10   4  -4 17.2688 4.37601   1
   4  -4 -10 7.05749 3.62563   3
  10  -4  -4 8.82142 3.17418  28
  10  -4  -4 9.74067 3.45620  29
 -10   4  -4 4.65154 4.62660  27
  10   4   4 12.0935 2.79649  29
 -10  -4   4 9.09300 2.91755  14
  -4  10   4 4.79961 3.53736  13
  -4   4  10 10.0663 4.02834  13
  -4   4 -10 6.40277 3.12948  15
 -10   4   4 14.2374 3.30642  14
  -4  10   4 13.6980 4.35647   7
  -4  10   4 13.6702 4.70073   6
   4   4  10 9.38147 3.40257   7
  -4  10  -4 6.15832 4.38575   6
   4  10   4 12.2747 4.39600   7
   4  10   4 9.51239 3.70256   6
  10   4  -4 20.5927 4.42304  24
  -4   4 -10 5.69489 5.51677  25
  -4  10  -4-2.50606 6.55015  27
   4   4 -10 12.2049 3.89617  22
   4  -4 -10 6.75011 4.12650  22
  -4 -10   4 9.48638 2.31810  20
  -4  -4  10 7.01985 2.39381  20
   4 -10  -4 13.0709 4.74105  21
  -4  -4 -10 5.49839 4.65956  21
   4  -4  10 13.6711 2.78698  20
   4 -10   4 10.6334 3.18820  20
   4  -4  10 9.98570 4.16638  17
  -4   4 -10 6.98915 2.45938  19
  -4  10  -4 9.61473 3.61599  18
  -4  -4 -10 18.5190 2.98902  19
   4   4 -10 12.6423 3.35108  15
  -4  -4  10 6.37496 2.43252  16
   4  -4 -10 4.60069 3.29257  15
   4 -10  -4 14.4576 4.28065  15
   4 -10   4 12.4498 3.10017  16
  -4 -10   4 7.91772 3.23010  16
  -4  -4 -10 15.3910 2.69540  15
   4  10  -4 9.80605 3.93447   7
  10   4  -4 14.2507 3.53008   7
  10   4   4 5.27733 3.95226   8
   4  10   4 8.35353 4.55767   8
  -4   4  10 14.0211 3.82099   8
   4   4  10 0.50729 3.94844   8
  -4 -10  -4 11.0439 3.50781  12
 -10   4  -4 8.60219 2.88643  10
  -4   4 -10 10.6900 2.76892   9
   4  10  -4 13.4502 3.69351   8
 -10  -5  -3 7.45372 3.10374   5
 -10   5   3 13.8600 3.48903   6
 -10  -3   5 10.8479 3.99123   5
  -3  -5  10 14.9054 3.99009   5
  10   5  -3 6.00844 3.96149   1
 -10  -3   5 13.6088 3.59790   2
 -10   5   3 10.1585 4.10250   2
   5   3 -10 13.4006 3.62654   1
   5 -10  -3 12.4050 5.48664   3
  -5 -10   3 13.8079 4.02486   4
   3  -5 -10 10.1747 3.79480   3
  10  -5   3 15.1847 3.63197  28
  10  -3  -5 16.2411 3.63560  28
  -3   5 -10 8.81692 5.18882  27
 -10   3  -5 18.9370 5.81835  27
 -10   5   3 13.9522 3.63037  27
  -5   3  10 12.9112 4.19021  13
  -3   5 -10 14.4987 3.65259  15
 -10   5   3 11.1937 3.03499  14
  -3  10   5 14.3154 4.23757  13
 -10  -3   5 10.3065 3.04053  14
  -3  10   5 7.90801 4.11239   6
  -3  10   5 6.29367 4.38823   7
   3   5  10 16.7805 4.19843   7
   5  10   3 13.2832 4.56540   7
  -5  10  -3 11.3113 5.01616   6
   5  10   3 12.6717 4.03236   6
  10  -5   3 11.2874 2.35543  26
  -5  10  -3 8.38672 6.27559  27
  -3   5 -10 9.57754 5.71837  25
 -10   3  -5 13.7747 5.51143  23
   3  -5 -10 2.07241 4.37423  22
 -10  -5  -3 14.2064 5.79941  23
  -3  -5  10 12.9586 2.64839  20
   5  -3  10 13.7601 2.91060  20
  -3   5 -10 13.3488 2.86689  19
  -5  10  -3 12.6112 3.85407  18
  -5  -3 -10 15.2292 2.92727  19
   5  -3  10 15.1614 4.31772  17
   5 -10  -3 9.42041 3.94822  15
   3  -5 -10 21.0325 4.03963  15
  -3  -5  10 11.0228 2.79711  16
  -3 -10  -5 11.6383 3.49893  15
   3 -10   5 9.24430 3.20148  16
   5   3 -10 15.0004 3.92557  15
   3  10  -5 8.74612 3.81194   7
  10   5  -3 11.0027 3.67442   7
   5  10   3 16.9969 4.77141   8
  -5   3  10 8.07575 3.44046   8
  10   3   5 5.85398 4.74161   8
   3   5  10 8.26328 4.48528   8
 -10   3  -5 15.2664 3.28701  10
  -5  -3 -10 16.9475 3.88274   9
  -5  10  -3 9.12775 2.69543  11
 -10  -5  -1 45.9735 6.67801   5
  -5   1  10 70.5594 7.39906   5
 -10  -1   5 40.5311 6.55751   5
 -10   5   1 47.2552 7.25016   2
 -10  -1   5 59.2541 6.77299   2
   5   1 -10 44.4227 6.66741   1
   1  -5 -10 54.1687 6.71579   3
  -5 -10   1 58.1443 7.54945   4
 -10   1  -5 49.2240 7.95699  27
   5 -10  -1 44.3323 6.71604  30
 -10   5   1 47.9060 7.52093  27
  10  -5   1 55.2812 6.66493  28
  10  -1  -5 49.2398 6.40900  28
  -1 -10  -5 58.4921 7.14475  12
  -5   1  10 60.7163 7.17014  13
   1   5  10 52.8662 8.12370  13
  -1  10   5 46.9898 7.16064  13
  -5 -10   1 64.0849 7.46091  12
 -10  -1   5 52.7701 6.41871  14
 -10   5   1 56.1687 6.35276  14
  -1  10   5 63.7147 7.63384   6
 -10   5   1 62.1337 6.67051   6
  -5  10  -1 55.2799 7.90567   6
   5  10   1 65.7302 6.46621  24
  -1   5 -10 48.2311 8.08851  25
  -5  -1 -10 58.0382 8.29394  25
  10  -1  -5 50.1652 6.85359  24
  -5  10  -1 55.8889 8.49431  27
 -10   1  -5 51.6027 9.22494  23
   5   1 -10 68.6004 7.48314  22
   1 -10   5 64.6782 6.56072  20
   1  -5 -10 65.3080 6.64240  19
  -1 -10  -5 65.8381 8.74603  21
   5  -1  10 62.0494 6.06264  20
   1 -10   5 60.0967 6.74162  16
  -1  -5  10 44.0031 6.08070  16
   5  -1  10 50.9921 7.36807  17
  -5  -1 -10 59.5678 6.33754  19
  -5  10  -1 66.4545 7.36892  18
  -1   5 -10 60.7344 6.14269  19
   5   1 -10 52.8521 6.79825  15
  -1   5 -10 60.4111 6.83067  15
  -1 -10  -5 38.4126 6.58865  15
   1  -5 -10 57.0334 6.91108  15
   1  10  -5 53.8629 6.83600   7
   5  10   1 68.3831 7.84479   7
   5  10   1 45.5324 7.31466   8
  -1  10   5 71.0098 8.07358   7
  10   5  -1 51.5374 6.81426   7
  -5  -1 -10 57.0051 6.92335   9
  10   5  -1 53.7153 7.60291   8
  -5  10  -1 41.6975 6.31068  11
  -1  10   5 51.9048 6.55684   8
  -5  -1  10 60.2725 7.46830   5
 -10   1   5 49.0538 6.14177   5
 -10  -1  -5 58.6693 7.11201   5
 -10  -5   1 46.1091 6.75290   5
  10   1  -5 75.3518 7.75126   1
  -1 -10   5 51.8305 7.08792   4
  -5 -10  -1 47.8369 7.50457   4
 -10   1   5 48.0229 6.62194   2
  10   5   1 69.1229 6.40112  29
 -10   5  -1 50.5377 7.87169  27
  10  -5  -1 64.2241 6.86831  29
  -5  10   1 54.0653 7.74919  27
  10  -5  -1 51.2100 6.61956  28
 -10  -1  -5 56.0210 7.82145  27
   1 -10  -5 47.1849 6.68223  12
  -5  -1  10 76.3404 7.02135  13
 -10   5  -1 51.8136 6.08556  14
  -1   5  10 54.2831 7.54348  13
  -5 -10  -1 61.0333 7.37014  12
   1  10   5 42.0663 6.85522   6
  -1  10  -5 51.0947 6.50416   7
 -10   5  -1 43.3715 6.08135   6
  -1  10  -5 59.1493 8.57688   6
  -1  10  -5 57.0759 10.3508  27
   5  -1 -10 58.8268 6.89478  25
  -1  -5 -10 55.3369 7.48989  25
  10   1  -5 60.2042 7.36776  24
   5  10  -1 64.1466 6.56872  24
 -10  -1  -5 42.6662 8.80638  23
  10   1  -5 59.8641 6.83526  22
   1   5 -10 52.7205 6.65895  22
  -5 -10  -1 50.3981 7.82080  21
   5  -1 -10 58.6409 7.40780  22
  -1  -5 -10 55.6722 6.31214  19
   5 -10   1 58.9617 6.90637  20
   1 -10  -5 48.8801 8.27044  21
   1  -5  10 55.6432 6.22962  20
  -1 -10   5 48.8990 6.11411  20
   1  -5  10 43.6570 6.23851  16
  -1  10  -5 45.5778 6.38373  18
 -10   5  -1 62.2566 6.75815  18
 -10  -1  -5 55.9949 5.68293  19
   5  -1 -10 68.8649 7.18722  15
  -5   1 -10 70.7433 6.44779  15
   1 -10  -5 46.0749 7.09262  15
  -1  -5 -10 51.2696 6.39439  15
   5   1  10 49.0642 7.10236   8
  -1   5  10 52.5526 7.23551   8
   5  10  -1 47.7161 7.18902   8
  10   5   1 56.1390 7.70807   8
   1  10   5 64.9729 7.94926   7
  -5   1 -10 67.5722 6.98521   9
  -5  10   1 40.0711 6.66216  11
   1  10   5 60.4660 7.21055   8
 -10   5  -3 6.26255 2.51525   6
 -10  -5   3 16.1154 4.04122   5
 -10  -3  -5 11.3817 3.69743   5
  -5  -3  10 7.97767 3.56532   5
  -3 -10   5 12.4779 4.07569   4
 -10   3   5 11.5205 3.55991   2
  -5 -10  -3 6.83599 4.62783   4
  10   3  -5 8.85331 4.08292   1
  10  -5  -3 14.9377 3.82788  28
  10  -5  -3 12.8622 3.59102  29
  10   5   3 12.3635 2.73614  29
 -10   5  -3 11.2583 5.39117  27
 -10  -5   3 11.6096 3.15583  14
  -5  -3  10 19.9025 3.53644  13
   3   5 -10 5.86002 3.19731  15
  -5   3 -10 16.8346 3.51878  15
  -3   5  10 7.46373 4.13586  13
  -5  10   3 10.2162 3.88546   7
  -3  10  -5 12.3660 5.44087   6
  -5  10   3 10.1984 4.67125   6
   5  10  -3 16.7165 4.47798   7
   3  10   5 14.1104 5.01661   7
  10   3  -5 11.5303 4.03591  24
   5  10  -3 16.0837 3.58433  24
  -5   3 -10 22.9382 6.50110  25
  10  -3   5 12.5133 2.38907  26
  -5 -10  -3 3.11057 4.37867  21
   5  -3 -10 16.1681 4.71174  22
 -10  -3  -5 13.1596 6.40363  23
  -3 -10   5 14.0304 2.81406  20
   5 -10   3 11.9519 3.17587  20
  -5  -3  10 16.3775 3.00550  20
   3 -10  -5 13.8227 5.43694  21
  -3  -5 -10 10.6637 5.11497  21
   3  -5  10 17.3808 3.14992  20
  -5   3 -10 12.3840 2.90418  19
 -10   5  -3 12.9215 3.13557  18
  -3  10  -5 13.2101 3.44518  18
  -3  -5 -10 8.27311 2.75169  19
  -3 -10   5 17.5453 3.47964  16
  -3  -5 -10 8.84870 2.93283  15
   3 -10  -5 10.5402 4.22861  15
   5 -10   3 15.3727 3.21039  16
   5  -3 -10 24.0133 4.19077  15
  10   3  -5 9.80671 3.58132   7
  -3   5  10 10.0555 3.61949   8
  10   5   3 15.2334 4.82260   8
   3  10   5 9.31435 4.15620   8
   5   3  10 12.2660 4.66122   8
 -10   5  -3 9.79801 2.96432  10
  -5  10   3 13.7419 4.00543  11
   5  10  -3 8.83734 4.08093   8
  -5   3 -10 13.0019 3.05023   9
  -5 -10   5 16.4357 3.60738   5
 -10   5   5 24.1145 4.28137   6
 -10  -5  -5 19.0494 4.09555   5
 -10   5   5 33.8505 5.16641   2
 -10  -5   5 12.1579 3.64995   2
  -5 -10  -5 22.8659 5.54250   4
  10   5  -5 28.3580 5.01717   1
  -5 -10   5 14.2595 4.16706   4
   5  -5 -10 20.3520 4.62802   3
  10  -5  -5 17.0970 3.97424  28
  -5   5 -10 13.4323 5.33447  27
 -10   5  -5 23.2229 6.04257  27
 -10  -5   5 17.8088 3.56958  14
  -5   5 -10 14.8294 3.81328  15
   5   5 -10 17.3572 4.13310  15
  -5  10   5 19.5833 5.26689   6
  -5  10  -5 6.24738 5.18487   6
   5  10   5 10.2432 4.57247   7
  -5   5 -10 28.7346 7.17454  25
  10  -5   5 23.9096 3.04782  26
  -5 -10  -5 18.0196 5.37977  21
   5  -5 -10 23.4961 5.60613  22
 -10  -5  -5 28.9130 6.94865  23
   5 -10  -5 14.2740 5.75917  21
  -5  -5 -10 22.3776 5.97108  21
   5 -10   5 16.5436 3.67598  20
  -5  -5  10 23.1035 3.31392  20
   5  -5  10 12.3720 3.11780  20
  -5   5 -10 12.8810 3.27188  19
  -5  10  -5 16.8107 4.49405  18
  -5  -5 -10 16.8068 3.24844  19
   5  -5 -10 14.8892 4.11010  15
   5 -10   5 22.3358 3.89260  16
   5 -10  -5 9.16096 4.81299  15
  -5 -10  -5 10.7824 3.41012  15
  -5 -10   5 18.2906 3.98034  16
  10   5   5 17.4393 5.65840   8
  -5   5  10 29.7655 4.78356   8
   5  10   5 14.8582 5.23941   8
   5  10  -5 15.1266 4.61024   7
   5   5  10 7.67054 5.20470   8
  10   5  -5 21.8562 4.50944   7
 -10   5  -5 9.30893 3.40159  10
 -10   5   5 19.8000 3.75190  11
  -5   5 -10 15.7122 3.26187   9
  -6 -10   4 31.2059 4.72490   5
 -10  -6  -4 20.2581 4.54930   5
 -10  -4   6 21.3153 5.31754   5
  -4  -6  10 32.2642 5.17129   5
 -10  -4   6 27.3275 4.71072   2
   6   4 -10 25.6180 5.34575   1
   6 -10  -4 42.6731 7.27801   3
   4  -6 -10 30.6930 5.91792   3
  -6 -10   4 25.8511 5.04829   4
  10  -4  -6 40.1836 4.97622  28
  -6  10  -4 43.8324 8.66823  27
 -10   4  -6 24.3814 6.54100  27
  -4   6 -10 26.0579 6.54245  27
  -4  10   6 17.9742 5.05944  13
  -6   4  10 30.4678 5.45423  13
   4  10  -6 19.1766 4.90140  15
  -4   6 -10 31.6204 5.08182  15
 -10  -4   6 27.8560 4.34986  14
   4   6  10 21.7859 5.49577   7
  -4  10   6 26.0744 5.80045   7
   6  10   4 24.8904 5.71049   7
  -4  10   6 33.2850 5.76900   6
  -6  10  -4 35.2138 6.40292   6
  10   6  -4 29.6699 5.55854  24
  10  -6   4 32.4963 3.84668  26
  -4   6 -10 49.8814 8.40657  25
 -10  -6  -4 7.68825 6.33350  23
  -4 -10  -6 29.0121 6.84368  21
   4 -10   6 27.3295 4.44837  20
  -4  -6  10 27.5431 4.01345  20
   6  -4  10 28.3661 4.03769  20
   6  -4  10 30.8088 5.51706  17
  -4   6 -10 33.1107 4.31157  19
  -6  10  -4 31.7846 5.19848  18
  -6  -4 -10 29.7762 4.30418  19
   4  -6 -10 36.9443 5.46171  15
  -4  -6  10 28.0377 4.08490  16
   4 -10   6 29.8899 4.70182  16
   6 -10  -4 31.5399 5.49166  15
  -4 -10  -6 17.9007 4.54823  15
   6   4 -10 30.5982 5.02157  15
  10   6  -4 39.8253 5.50811   7
   4  10  -6 20.4806 5.02158   7
   6  10   4 27.0633 6.24909   8
  10   4   6 21.3592 5.99480   8
  -6   4  10 31.4847 5.16202   8
   4   6  10 26.7269 6.29986   8
 -10   4  -6 31.4388 4.44193  10
  -6  -4 -10 37.1573 5.33428   9
 -10   6   4 24.0538 4.40896  11
  -2  -6  10 188.480 18.9663   5
  -6   2  10 196.448 18.7881   5
 -10  -2   6 191.266 19.2591   5
 -10  -6  -2 157.408 18.4911   5
  -6 -10   2 190.814 19.1843   4
 -10  -2   6 226.280 18.8835   2
   6 -10  -2 212.715 19.9429   3
   2  -6 -10 197.592 18.8679   3
   6   2 -10 197.588 18.8263   1
  10  -6   2 179.935 18.8251  30
 -10   6   2 192.437 19.0646  27
 -10   2  -6 203.136 19.9487  27
  -6  10  -2 191.338 20.3812  27
  -2   6 -10 211.736 20.5086  27
  10  -6   2 209.244 18.7939  28
  10  -2  -6 212.520 18.5429  28
  -2  10   6 156.595 18.9330  13
  -6   2  10 228.127 19.2811  13
  -6 -10   2 247.068 19.5783  12
 -10   6   2 170.358 18.2250  14
 -10  -2   6 191.332 18.4678  14
  -6  10  -2 196.208 19.6796   6
  -2  10   6 197.068 19.3120   6
 -10   6   2 188.178 18.6645   6
  -2   6 -10 199.396 20.5675  25
  10  -2  -6 187.041 18.7299  24
  10   6  -2 279.364 20.0368  24
  -2 -10  -6 188.680 20.3908  21
   6   2 -10 184.221 19.1826  22
 -10  -6  -2 148.440 19.7759  23
   2 -10   6 209.192 18.5934  20
  -2  -6  10 206.858 18.2768  20
   6  -2  10 160.307 18.8794  17
   2 -10   6 201.952 18.5982  16
  -6  10  -2 212.556 19.5198  18
  -6  -2 -10 213.258 18.4808  19
  -2   6 -10 225.639 18.3380  19
  -2  -6  10 188.090 18.2931  16
   6   2 -10 221.540 19.0165  15
  -2   6 -10 224.878 19.0424  15
  -2 -10  -6 144.889 18.5426  15
   2  -6 -10 222.567 19.1866  15
   6  10   2 199.887 19.5321   7
  -2  10   6 213.202 19.6981   7
   2   6  10 201.160 19.2585   7
  10   6  -2 202.779 19.0490   7
   2  10  -6 179.250 18.6808   7
  10   6  -2 166.095 19.2392   8
   6  10   2 205.027 19.6191   8
  -6  10  -2 174.838 18.3563  11
  10   2   6 161.705 19.2812   8
  -6   0  10 45.8892 6.32399   5
 -10   6   0 40.5310 5.55094   6
 -10   0   6 34.6249 5.54743   5
 -10  -6   0 23.1287 5.43882   5
   6   0 -10 33.4232 6.20012   1
  -6 -10   0 35.7211 6.40024   4
 -10   0   6 31.6009 5.64480   2
  10   0  -6 34.2877 6.56482   1
 -10   0  -6 47.0192 7.13997  27
  -6  10   0 27.5479 7.38846  27
 -10   6   0 37.7342 6.81590  27
  10  -6   0 62.2898 6.12638  29
  10  -6   0 49.5848 6.07884  28
   0   6  10 29.5455 7.01979  13
 -10   0   6 44.9466 5.65493  14
  -6   0  10 42.7733 5.88628  13
  -6 -10   0 41.7763 6.37349  12
  -6  10   0 40.3616 6.81205   6
  10   6   0 42.1076 6.09462   7
   6  10   0 40.8413 6.77676   7
   0  10   6 48.3882 6.60687   6
   0  10  -6 45.0897 7.60090   6
   0  10   6 38.7926 6.83819   7
  10   6   0 58.1331 6.65989  24
   0   6 -10 33.9257 7.16151  25
   6  10   0 59.3860 5.83142  24
  10   0  -6 31.5955 5.87357  24
   6   0 -10 52.1893 6.74200  22
 -10   0  -6 60.1810 9.29867  23
  10   0  -6 30.5594 5.51785  22
 -10  -6   0 46.9536 7.81782  23
   6 -10   0 51.0370 6.18494  20
   0  -6 -10 45.8678 5.61190  19
   0 -10   6 38.8590 5.29033  20
   0 -10  -6 47.9606 7.84252  21
 -10   0  -6 47.6896 4.93743  19
   6   0  10 27.0714 5.90509  17
  -6   0 -10 46.8872 5.40315  19
   0   6 -10 45.8038 5.03510  19
 -10   6   0 50.9418 6.04346  18
   0 -10  -6 34.4481 6.22612  15
   0   6 -10 54.5129 6.14623  15
   0  -6 -10 38.7381 5.82987  15
   6   0 -10 43.5387 5.94371  15
   0  -6  10 35.0303 5.37467  16
   0 -10   6 43.4187 5.63713  16
   6   0  10 38.7065 5.97908   8
   0  10  -6 52.2107 5.97787   7
   0   6  10 45.8962 6.74616   8
   6  10   0 37.2835 6.59206   8
   0  10   6 51.8814 6.39700   8
  -6   0 -10 50.4524 5.98209   9
  -6  10   0 33.6702 5.48704  11
  10   6   0 36.4339 6.69078   8
  -6 -10  -2 177.182 19.7252   4
  -6  -2  10 246.134 20.5185   5
 -10   2   6 188.902 18.6210   5
 -10  -6   2 173.387 19.3226   5
 -10  -2  -6 233.012 19.7926   5
  -2 -10   6 194.861 19.4035   4
 -10   2   6 168.268 18.9924   2
  10   2  -6 254.588 20.2071   1
  10  -6  -2 196.721 19.5078   3
 -10  -2  -6 172.833 19.6968  27
  10  -6  -2 236.105 19.4003  29
 -10   6  -2 199.451 20.3345  27
  -2  10  -6 219.801 22.7928  27
  10  -6  -2 200.617 19.2979  28
  -6 -10  -2 189.579 19.7018  12
  -2   6  10 158.005 19.7304  13
  -6  -2  10 230.789 19.3739  13
 -10  -6   2 207.815 19.1049  14
  -2  10  -6 207.557 21.0645   6
 -10   6  -2 193.656 18.7174   6
  -6   2 -10 181.899 20.4435  25
  10  -2   6 210.990 18.4658  26
   6  10  -2 210.309 19.2592  24
  10   2  -6 184.274 19.8101  24
   2 -10  -6 205.900 20.8560  21
  -2  -6 -10 180.612 20.4092  21
   6  -2 -10 198.773 19.7235  22
  -6 -10  -2 156.948 19.7290  23
 -10  -2  -6 211.946 21.7254  23
  10   2  -6 230.843 19.5050  22
  -6 -10  -2 219.329 20.4959  21
   6 -10   2 195.525 19.2232  20
   2  -6  10 182.288 18.7698  20
  -2 -10   6 199.351 18.7905  20
  -2  10  -6 206.313 19.2808  18
 -10   6  -2 220.620 19.5286  18
  -2 -10   6 237.018 19.3417  16
   6  -2 -10 240.064 19.7049  15
   2   6 -10 180.675 19.1120  15
  -2  -6 -10 195.909 18.9705  15
   6  10  -2 178.360 19.6179   7
   2  10   6 225.616 20.4471   7
  10   2  -6 239.404 19.6343   7
  -2   6  10 187.215 19.5356   8
  10   6   2 214.448 20.4467   8
   6  10  -2 180.159 19.6219   8
  -6   2 -10 237.779 19.4402   9
  -6  10   2 159.548 19.2957  11
 -10  -2  -6 245.444 19.1595   9
   2  10   6 206.620 19.9023   8
   6   2  10 193.685 19.7105   8
  -6  -4  10 36.9507 5.63557   5
  -4 -10   6 32.2325 4.46550   5
 -10   4   6 25.5404 4.60925   6
 -10  -6   4 25.0503 5.43544   5
 -10  -4  -6 29.8693 5.16450   5
  -6 -10  -4 24.4011 5.60363   4
  -4 -10   6 29.6208 5.00982   4
 -10   4   6 27.3944 5.10100   2
  10   4  -6 31.7431 5.47034   1
   4 -10  -6 21.7226 6.22297   3
  10  -6  -4 30.6621 5.79285   3
  -6   4 -10 19.3845 5.79876  27
  10  -6  -4 28.7221 4.76289  29
 -10  -6   4 26.7905 4.32785  14
   4   6 -10 27.6720 4.93493  15
  -4  10  -6 35.7732 6.85253   6
  -6  10   4 33.2673 6.13052   6
   4  10   6 32.4395 5.98076   7
   6  10  -4 32.0558 5.35083  24
  10   4  -6 27.2729 5.65304  24
  -4  10  -6 51.2560 9.73689  27
  -6   4 -10 30.6363 7.36781  25
  10  -4   6 24.0232 3.52538  26
  -6 -10  -4 17.2980 5.95354  21
   6  -4 -10 26.7737 5.83531  22
  -6  -4  10 19.2330 3.87610  20
  -4  -6 -10 36.4273 6.76118  21
   4 -10  -6 34.8413 7.01818  21
   4  -6  10 19.2652 3.89502  20
  -4 -10   6 24.6734 3.74467  20
   6 -10   4 24.5709 4.42942  20
   4  -6  10 24.7912 4.32558  16
  -6   4 -10 32.2329 4.30729  19
  -4  10  -6 25.2973 4.80377  18
 -10   6  -4 27.3812 4.52122  18
  -4  -6 -10 12.3013 3.71622  19
   6  -4 -10 34.7608 5.09267  15
   6 -10   4 28.8742 4.35755  16
   4 -10  -6 34.7741 5.70260  15
  -4 -10   6 36.8840 4.86874  16
  10   4  -6 17.6933 4.76965   7
  -4   6  10 33.4672 5.13685   8
  10   6   4 30.8385 6.22882   8
   4  10   6 26.8525 5.78848   8
   6   4  10 31.2659 6.29701   8
   6  10  -4 22.9534 5.22517   8
 -10   6  -4 24.9238 4.23649  10
 -10  -4  -6 27.6013 4.10201   9
  -6   4 -10 37.2611 4.64717   9
  -6 -10  -6 77.7912 10.3997   4
  -6  -6  10 99.4964 10.2995   5
  -6 -10   6 89.2640 9.56632   5
 -10  -6   6 87.2916 10.4247   5
 -10  -6  -6 111.273 10.1347   5
  -6 -10   6 71.9961 9.47345   4
   6  -6 -10 77.5463 10.2071   3
  10  -6  -6 77.3894 10.2123   3
  10   6  -6 81.7258 10.3291   1
  -6   6 -10 72.6643 11.1918  27
  10  -6  -6 76.2938 9.50444  28
 -10   6  -6 70.3936 11.1697  27
  -6   6  10 109.103 11.1086  13
  -6  10   6 76.4914 9.92769  13
 -10   6   6 112.347 10.7807  13
 -10  -6   6 77.2174 9.03916  14
  -6  10   6 93.6548 10.5447   6
 -10   6   6 85.4035 9.71397   6
  -6   6 -10 91.6244 12.0798  25
  10   6  -6 92.5548 11.1366  24
  10  -6   6 92.8203 8.55946  26
   6  10  -6 75.7837 10.1788  24
  -6 -10  -6 91.8120 11.6673  21
 -10  -6  -6 77.7215 11.8288  23
   6 -10   6 89.4545 9.42144  20
   6 -10  -6 80.9127 11.4811  21
  -6  -6  10 81.5740 8.84738  20
   6  -6  10 104.521 9.23600  20
   6  -6  10 71.4329 8.91446  16
  -6  10  -6 71.3490 9.68244  18
  -6  -6 -10 72.0935 8.98549  19
  -6   6 -10 83.7818 9.12615  19
   6 -10   6 88.8724 9.29433  16
   6   6 -10 89.5097 9.74686  15
   6 -10  -6 81.5255 10.3225  15
   6  -6 -10 82.1518 9.85665  15
   6  10   6 75.9161 10.3619   7
   6  10   6 67.9915 10.4260   8
   6   6 -10 84.7030 10.1505   7
  10   6  -6 77.3435 9.93802   7
   6  10  -6 90.4145 10.3834   7
  -6  -6 -10 96.7695 9.85431   9
  -6  10   6 70.9673 9.95076  11
 -10  -6  -6 79.4762 8.96352   9
 -10   6   6 98.8605 9.58290  11
  10   6   6 83.4730 11.1492   8
  -6   6  10 126.749 10.4389   8
   6   6  10 82.9435 10.9012   8
 -10   6  -6 84.4314 9.07129  10
  -5  -7  10 23.8456 4.52644   5
  -7 -10   5 14.1922 4.32552   4
  -7 -10   5 16.8916 4.14432   5
  -7   5  10 17.4377 3.84852   6
 -10  -7  -5 12.5864 3.81206   5
 -10  -5   7 17.6070 5.33240   5
 -10   7   5 16.9053 4.57042   6
   7   5 -10 11.5460 5.08312   1
 -10  -5   7 9.25364 3.63733   2
   7 -10  -5 13.4234 6.18867   3
   5  -7 -10 26.2409 6.00259   3
  10  -5  -7 19.6095 4.38964  28
  -5   7 -10 24.9401 7.56390  27
  -7  10  -5 38.7584 8.50698  27
 -10   5  -7 18.6664 6.59232  27
  -5  10   7 2.93670 4.58942  13
   7   5 -10 8.65546 4.30989  15
  -7   5  10 26.5610 5.39295  13
   5  10  -7 12.7766 4.13839  15
  -5   7 -10 20.1985 4.67001  15
 -10  -5   7 22.6376 3.82843  14
   5   7  10 22.8538 5.20886   7
  -5  10   7 18.3615 5.55172   6
   7  10   5 20.3328 5.18785   7
  10  -7   5 15.7502 2.84587  26
  -5   7 -10 23.9239 7.69729  25
  10   7  -5 23.3007 5.49169  24
 -10  -7  -5 3.32403 6.93548  23
   5 -10   7 13.0576 3.70485  20
  -5 -10  -7 12.2844 6.14226  21
  -5  -7  10 18.0212 3.29065  20
   7  -5  10 17.1769 3.35958  20
  -5   7 -10 24.6595 3.74766  19
  -7  10  -5 18.5802 4.77680  18
  -7  -5 -10 13.6526 3.37213  19
   5  -7 -10 13.4289 4.65260  15
   5 -10   7 15.7189 3.74493  16
   7 -10  -5 10.3035 4.65692  15
  10   7  -5 21.5912 5.14077   7
   7  10   5 24.1918 6.01804   8
   5  10  -7 14.0868 4.60772   7
  10   5   7 12.7751 6.02910   8
   5   7  10 16.9296 5.81740   8
  -7  -5 -10 24.3242 4.50962   9
 -10   7   5 23.4384 4.25374  11
 -10  -7  -3 8.17091 3.36587   5
 -10   7   3 13.2152 4.04758   6
 -10  -3   7 17.5462 4.75988   5
  -7 -10   3 15.1947 3.40676   5
  -7 -10   3 4.79184 3.66501   4
  -3  -7  10 5.40285 3.49495   5
 -10  -3   7 8.52405 3.59558   2
   7 -10  -3 14.5780 5.83923   3
   7   3 -10 19.2029 4.54591   1
  -7   3  10 8.45148 3.59161   2
   3  -7 -10 16.1613 4.49127   3
  10  -3  -7 5.30036 3.13626  28
 -10   3  -7 9.17442 5.87892  27
  -7  10  -3 4.89128 6.42390  27
  -3   7 -10 11.9173 3.63811  15
   3  10  -7 1.36046 3.51882  15
  -7   3  10 12.8478 4.09346  13
 -10   7   3 11.8779 3.38023  14
  -7 -10   3 11.0375 3.98013  12
 -10  -3   7 4.02642 2.81596  14
  -3  10   7 9.92486 4.26561  13
   3   7  10 11.9664 4.30155   7
  -3  10   7 7.61429 4.81705   7
  -7  10  -3 13.1647 4.90448   6
  -3  10   7 12.2206 4.32295   6
   7  10   3 12.5143 4.80611   7
  -3   7 -10 12.4234 6.19078  27
  -3   7 -10 11.8330 6.58661  25
  10   7  -3 10.3257 4.27825  24
   7   3 -10 17.1643 4.50677  22
 -10  -7  -3 5.90559 5.42850  23
  -3 -10  -7 17.5880 6.13143  21
  -3  -7  10 6.43049 2.56646  20
  -3   7 -10 7.51466 2.69449  19
  -7  10  -3 9.56481 3.69480  18
   7  -3  10 11.0215 4.33068  17
  -7  -3 -10 6.20241 2.78496  19
   3 -10   7 14.9366 3.54210  16
  -3  -7  10 6.55723 2.81004  16
   7 -10  -3 10.0571 4.26230  15
  -3 -10  -7 12.8989 3.86324  15
   7   3 -10 22.0012 4.24093  15
  10   7  -3 5.89858 3.79887   7
   7  10   3 6.11306 4.54685   8
   3  10  -7 9.28333 3.58996   7
  10   3   7 6.69481 5.23103   8
   3   7  10 5.67301 4.95222   8
  10   7  -3 1.20068 4.29862   8
  -7  -3 -10 13.7016 3.85236   9
[truncated: 257,466 more chars]
